# Supplementary material for: Hordein Accumulation in Developing Barley Grains
Source: PubMed Central journal article supplement (PMC6532529; doi:10.3389/fpls.2019.00649), 2019-05-16
Supplement: Data_Sheet_1.pdf [file Data_Sheet_1.pdf]

## Supplementary Figures

### Avenin-like protein A (F2EGD5):

MKTMLIILALIAFAATSAVAQLD<sup>TTC</sup> **SGY**GQCQQPQQQMNTCAAF**LQ**CSRTPYVQ**SQ**MWQASGC**QL**MRQCC**Q**PLAQIS  
**EQ**ARCQAVCSMAQVIMRQ**Q**Q**Q**SFTQ**P**Q**Q**Q**S**S**F**G**Q**P**Q**Q**V**VEVMR**VL**Q**T**LP**SMC**SV**NI**P**Q**Y**C**TTTTPCSTITPTIYSI  
PMAATCAGGV

### B1-hordein (I6SJ22):

MKTFLIFALLAIAATSTIA**QQ**Q**PL**Q**Q**PI**P**Q**K**P**Q**Y**P**Q**Q**P**F**P**Q**Q**P**F**Q**Q**P**V**P**Q**Q**P**Q**Y**P**Q**Q**P**Q**P**F**P**Q**Q**P**F**Q**Q**P**F**Q**L  
**Q**Q**F**P**Q**Q**P**F**Q**L**Q**R**IL**S**Q**Q**P**C**T**P**Q**Q**T**PL**Q**G**Q**L**Y**Q**T**LL**Q**L**Q**IP**V**H**PS**IL**Q**Q**L**NP**CK**V**L**Q**Q**C**S**P**V**R**MP**Q**L**I**AR**L**Q**M**L**  
**Q**L**S**S**CH**V**L**Q**Q**C**Q**Q**L**P**Q**I**SE**Q**R**H**E**A**IR**A**IV**Y**S**I**F**L**Q**E**Q**P**Q**S**V**Q**G**V**S**Q**T**Q**Q**Q**L**Q**Q**E**K**V**G**Q**C**S**F**Q**Q**P**Q**Q**L**G**Q**P**Q**V**P**Q  
SV**FL**Q**PH**Q**IA**Q**LE**AT**T**S**I**AL**R**T**L**PR**MC**N**V**N**V**PL**Y**D**IM**P**P**D**FW**H

### B3-hordein (I6SJ26)

MKTFLIFALLAIVATSTIA**QQ**Q**Y**P**Q**Q**P**F**Q**Q**P**IP**Q**Q**P**F**Q**Q**P**Q**Y**P**Q**Q**P**F**Q**Q**P****Q**Q**PI**P**Q**Q**P**Y**P**Q**Q**P**Q**F**Q**Q**PI**  
**P**Q**Q**P**Q**Y**P**Q**Q**P**Q**F**PL**Q**P**F**PS**Q**Q**P**F**Q**Q**P**P**F**W**Q**Q**P**V**L**S**Q**Q**Q**P**C**T**P**Q**Q**T**PL**Q**G**Q**D**Q**M**L**V**Q**V**Q**I**P**F**V**H**PS**IL**Q**Q**L**NP**CK**V  
**FL**Q**Q**C**S**P**V**A**MS**Q**R**I**AR**S**Q**M**L**Q**Q**S**SC**Y**V**L**Q**Q**C**Q**Q**L**P**Q**I**PE**Q**R**H**E**A**V**R**A**IV**Y**S**I**V**L**Q**E**Q**P**Q**L**V**Q**G**V**S**Q**P**Q**Q**S**Q**L**H**Q**V**  
G**Q**C**S**F**Q**Q**P**Q**Q**G**Q**Q**Q**V**P**Q**S**V**FL**Q**PL**Q**LA**Q**LE**AT**S**I**AL**R**T**L**P**M**MC**S**V**N**V**P**F**Y**R**I**L**P**F**G**ID**T**R**V**G**V

### B3-hordein (I6TRT5):

MKTFLIFALLAIVATSTIA**QQ**Q**Y**P**Q**Q**P**F**Q**Q**P**Q**Y**P**Q**Q**P**F**Q**Q**P**IP**Q**Q**P**Q**Y**P**Q**Q**P**F**Q**Q**P****Q**Q**PI**P**Q**Q**P**Y**P**Q**Q**P**Q**F**Q**Q**PI**  
**W**Q**Q**Q**P**V**L**S**Q**Q**Q**P**C**T**Q**E**Q**T**PL**L**Q**E**Q**D**Q**M**L**L**Q**V**Q**I**P**F**V**H**PS**IL**Q**Q**L**NP**CK**V**L**Q**Q**C**S**P**V**A**MS**Q**R**I**AR**S**Q**M**L**Q**Q**S**S**CH**V**L**Q**Q  
**Q**C**Q**Q**L**P**Q**I**PE**Q**L**R**H**E**A**V**R**A**IV**Y**S**I**V**L**RE**Q**S**L**Q**L**V**Q**G**V**S**Q**P**Q**Q**S**Q**Q**Q**V**G**Q**C**S**F**Q**Q**P**Q**Q**G**Q**Q**V**P**Q**S**V**LL**Q**PH**Q**IA**Q  
**LE**AT**T**S**I**AL**R**T**L**P**T**M**C**S**V**N**V**PL**Y**R**IV**PL**A**ID**T**R**V**G**V**

### C-hordein (Q41210):

MKTFLTFVLLAMVMSIVTTA**R**Q**L**NP**SS**Q**EL**Q**S**P**Q**Q**S**Y**L**Q**Q**Y**P**Q**N**P**Y**L**P**Q**Q**P**F**V**Q**Q**P**F**HT**P**Q**Q**Y**F**P**Y**L**PE**EL**S**P**Q**Y**Q**I**P**T**  
**PL**Q**P**Q**Q**P**F**Q**Q**P**Q**PL**RP**Q**Q**P**F**W**Q**P**Q**P**F**Q**P**Q**Q**PI**P**Y**Q**P**Q**P**F**N**Q**P**Q**Q**I**S**Q**Q**P**Q**P**F**Q**Q**P**Q**Q**P**F**Q**P**Q**Q**P**F**W**Q**P  
**Q**Q**P**F**Q**P**Q**P**F**PL**Q**P**Q**P**F**W**Q**P**Q**P**F**Q**P**Q**Q**PI**A**H**Q**P**Q**P**F**S**F**S**Q**Q**P**Q**P**F**PL**Q**P**Q**P**F**Q**Q**P**Q**P**Q**P**Q**P**Q**Q**PI**I**F**Q**Q**P**Q  
**Q**S**Y**P**V**Q**P**Q**P**F**Q**P**Q**P**V**Q**Q**R**P**Q**Q**AS**PL**Q**P**Q**P**F**Q**G**SE**Q**I**I**P**Q**Q**P**Q**P**F**PL**Q**P**Q** H**Q**P**Y**T**Q**Q**T**I**W**S**M**V

### C-hordein (Q40053):

MKTFLTFVLLAMVMSIVTTA**R**Q**L**NP**SS**Q**EL**Q**S**P**Q**Q**S**Y**L**Q**Q**Y**P**Q**N**P**Y**L**P**Q**K**P**F**V**Q**Q**P**F**HT**P**Q**Q**Y**F**P**Y**L**PE**EL**F**P**Q**Y**Q**I**P**T**  
**PL**Q**P**Q**Q**P**F**Q**Q**P**Q**PL**RP**Q**Q**P**F**W**Q**P**Q**P**F**Q**P**Q**Q**PI**P**Q**Q**P**Q**P**F**Q**Q**P**Q**P**F**Q**Q**P**Q**Q**P**Q**P**Q**P**Q**Q**PI**I**F**Q**Q**P**Q**S**Y**P**V**Q**P**Q**P**F**Q**P**  
**Q**P**V**Q**Q**R**P**Q**Q**AS**PL**Q**P**Q**P**Q**Q**AS**PL**Q**P**Q**P**F**Q**G**SE**Q**I**I**P**Q**Q**P**F**PL**Q**P**Q**P**F**Q**Q**P**Q**PL**Q**P**Q**P**F**R**Q**Q**A**E**L**I**I**P**Q**Q**P**Q**Q**PL  
**PL**Q**PH**Q**P**Y**T**Q**Q**T**I**W**S**M**V**

### D-hordein (I6TRS8):

MA**K**R**L**V**L**F**V**A**V**I**V**A**L**V**A**L**T**T**A**ERE**I**NG**N**I**F**L**D**S**R**S**R**Q**L**Q**C**ER**E**L**Q**ESS**L**E**A**C**R**R**V**D**Q**Q**L**V**G**Q**L**P**W**S**T**G**L**Q**M**Q**C**C**Q**Q**L**R**D**  
**V**S**PE**CR**P**V**A**L**S**Q**V**R**Q**Y**E**Q**Q**T**E**V**P**S**K**G**S**F**Y**P**G**G**T**A**P**PL**Q**G**G**W**G**T**S**V**K**W**Y**P**D**Q**T**S**S**Q**S**W**G**Q**Q**G**Y**H**Q**S**V**T**S**S**Q**P**G**Q  
**G**Q**Q**S**Y**P**G**S**T**F**P**Q**P**G**Q**G**Q**P**G**Q**R**P**W**S**Y**P**S**A**T**F**P**Q**P**G**Q**G**Q**G**Q**G**Y**P**G**A**T**S**L**L**Q**P**G**Q**G**Q**P**Y**Q**S**A**T**S**P**Q**P**G**Q**G**Q**Q**  
**E**T**Y**P**I**A**T**S**PH**Q**P**G**Q**W**Q**Q**P**G**Q**Q**Q**G**Y**Y**P**S**V**T**S**P**Q**Q**S**G**Q**G**Q**G**Y**P**S**T**T**S**P**Q**Q**S**G**Q**Q**L**G**Q**Q**P**G**Q**Q**G**Y**P**S**A**T**F**P**Q**P**G**Q**  
**W**Q**Q**S**Y**P**S**T**T**S**P**Q**Q**S**G**Q**Q**G**Q**G**Y**N**P**S**G**T**S**T**Q**P**G**Q**V**Q**Q**L**G**Q**Q**Q**Q**G**Y**P**I**A**T**S**P**Q**P**G**Q**G**Q**L**G**Q**Q**P**G**H**G**Q**Q**L**V**Q**G**Q**Q**G**Q**  
**G**Q**Q**G**H**Y**P**S**M**T**S**PH**Q**T**G**Q**G**Q**K**G**Y**P**S**A**I**S**P**Q**S**G**Q**G**Q**G**Y**Q**P**S**G**A**S**S**Q**S**V**Q**G**A**C**Q**H**S**T**S**S**P**Q**Q**A**Q**G**C**Q**A**S**S**P**K**Q**L**G**S**L**Y  
**Y**P**S**G**A**Y**T**Q**Q**K**P**G**Q**G**Y**N**P**G**G**T**S**PL**H**Q**Q**G**G**G**F**G**G**L**T**T**E**Q**P**Q**G**K**Q**P**F**H**C**Q**Q**T**T**V**S**PH**Q**G**Q**Q**T**T**V**S**PH**Q**G**Q**Q**T**T**V**S**PH**Q**G**Q**Q**T**

TVSPHQGQQTTVSPHPGQQTTVSPHQGQQTTVSPHPGQQTTVSPHQGQQTTVSPHQGQQTTVSPHQGQQTTVSPHQGQQT  
 VSPHQGQQPGEQPCGFPGQQTTVSLHHGQQSNELYGSPYHVSVEQPSASLKVAKAQQLAQLPAMCRLEGGGGLLASQ

Gamma-1-hordein (I6TMV6):

MKILIIILTIILAMATTFATSEMQVNPSSVQVQPTQQQYPESQQPFISQSPQQFPLPQQPFPPQQPQQPFQSSQQQCLQQPQH  
 FPQPTQQFPQRPLLPFTHPFLPFDPQLLPQPPHQSFPQPPQSYQPPLQPFPPQQKYPEQPPQPPFWQQPTIQLYLQQ  
 LNSCKEFLQCRPVSLLSYLWSKILQQSSCRVMQQCCCLQLAQIPEQYKCTAIDSIVHAIQFMQQGQRQGVQIVQQQPQP  
 QVGQCVLVQGGVAQPQQLAQMEAIRTLVLQSVPSMCNFNVPNCSTIKAPFVGVVTGVGGQ

Gamma-1-hordein (M0XYT2):

MKILIIILIIILAMATSFATSEMQVNPSSVQVQPTQQQTHPESQQPFIHHSQQQFPQPPQSSFPQQPQQPFQSSQQPCLQQPQH  
 FPQPSQPFPRQPLQPFPRPFLPFPEQLPQPPQESFPQPPQSYQPPLQPFPPQESFPQPPQSYQPPLQPFPPQPPQ  
 YPEQPPQPFPRPPQEQFPNQPPQPPFWQQPSIQLYLQQQLNPKKEFLQCRPVSLSYLWSKIVQSNQVMQEQCCCLQL  
 AQIPEQYKCTTIDSIVHAIQFMQQGQRQGVQIVQQQPQPQEVGQCVLVQGRDIVQQPQLAQMEAIRSLVLQSVPMCNFNVP  
 PNCSTMRAFFSLVNAGML

Gamma-3-hordein (I6TEV2):

MKIFLLFSLLGVATAITTTTQMNFNSGLELERPQQLFQWQPLPQQPPFLQQEPEQYPQQQPLPQQQPFPPQQPLPHQH  
 FPQQLPQQQFPQQMPLQPPQQPFPQQKPFQYQQPLTQQPYPQQQPLAQQQPSIEEQHQLNLCKEFLQCTLDEKVPLL  
 QSVISFLRPHISQQNSCQLKRQCCQQLANINEQSRCPAIQTIVHAIQVMQQQQQVQQQVDHGFVQSLLQQLGQGMPIQLQ  
 QPQGAQFVLPQQQAQFKVVGSLVIQTLPLMLCNVHVPPYCSFPGSMATGSGGQ

**Figure S1.** Amino acid sequence coverage of representative hordeins from each class as analysed using liquid chromatography mass spectrometry. The discovery data presented here was derived from a previous study of barley cv Sloop (Colgrave *et al*, 2016, *Anal. Chem.*, 88, 9127). Legend: amino-acids in green were confidently identified ( $\geq 95\%$ ), while amino acids in yellow were identified with 50-95% confidence and those in red with  $< 50\%$  confidence. Residues in grey were not detected. There was no evidence of signal peptides (predicted by SignalP server, underlined).

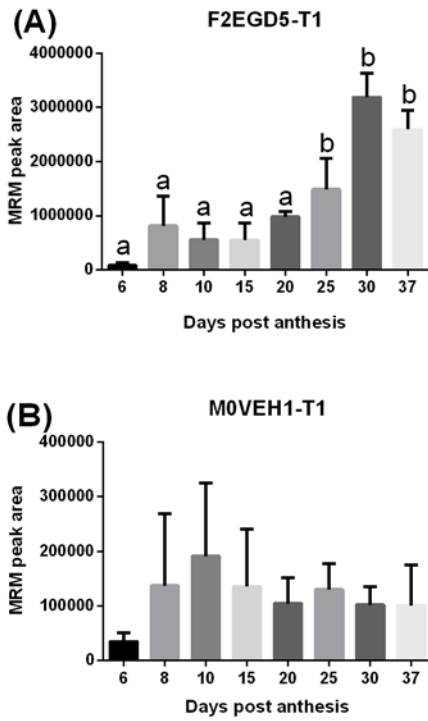

**Figure S2.** The effect of maturity (days post anthesis, DPA) on the accumulation of the indicated avenin-like protein (ALP) specific peptides following trypsin cleavage. The mean multiple reaction monitoring (MRM) peak area  $\pm$  SE (n=3) from 5  $\mu$ g extracted protein is shown for the indicated peptide. Within A, points with different letters were significantly different at  $p < 0.05$  by one-way ANOVA and Tukey's test. No points were significantly different in B.

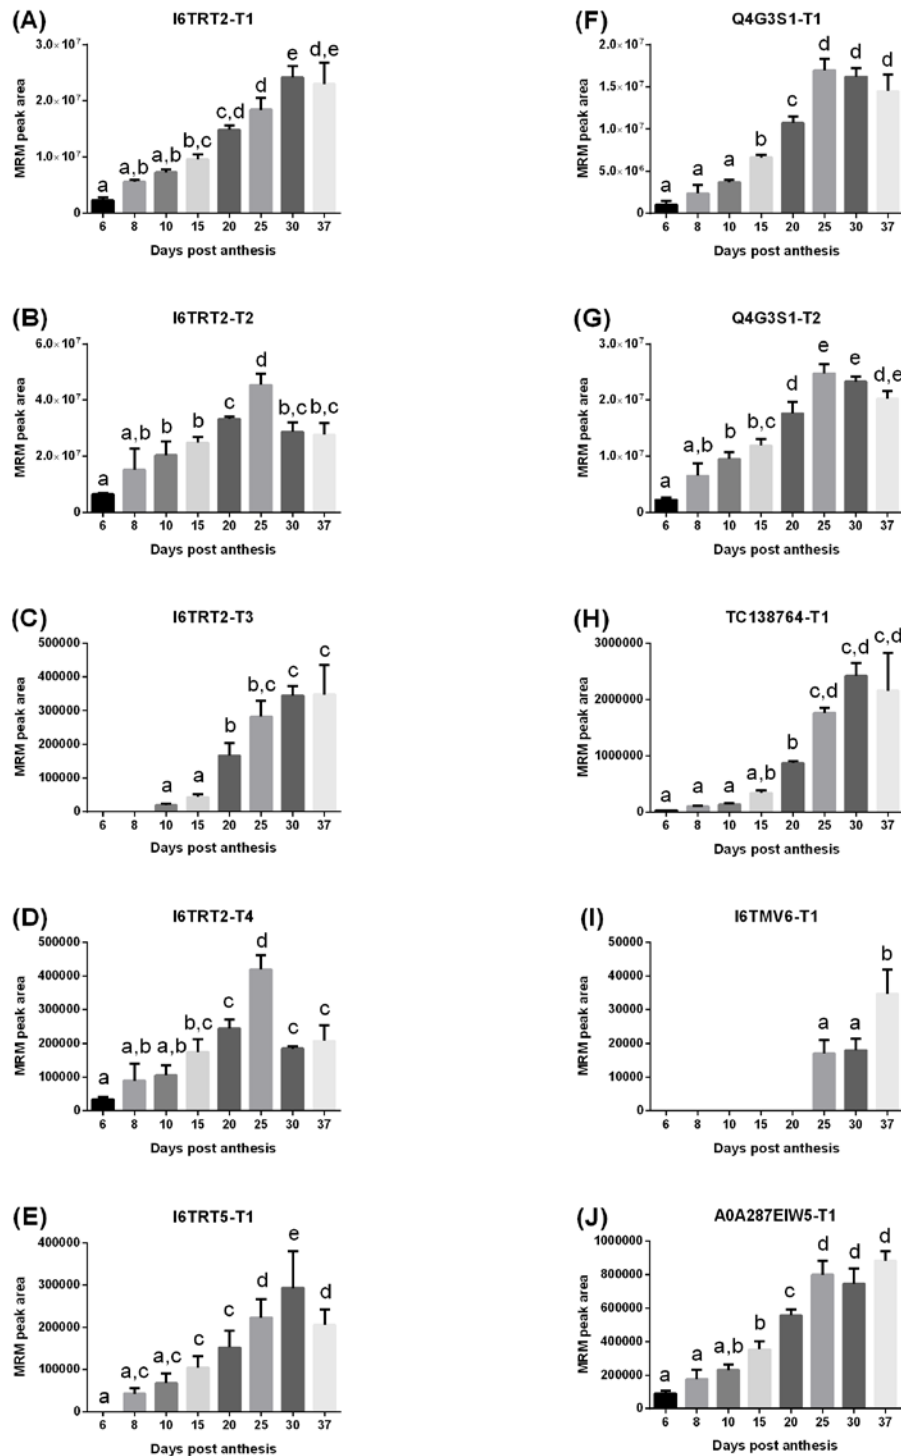

**Figure S3.** The effect of maturity (days post anthesis, DPA) on the accumulation of the indicated B1-hordein specific peptides following trypsin cleavage. The mean multiple reaction monitoring (MRM) peak area  $\pm$  SE (n=3) from 5  $\mu$ g extracted protein is shown for the indicated peptide. Within each graph, points with different letters were significantly different at  $p < 0.05$  by one-way ANOVA and Tukey's test.

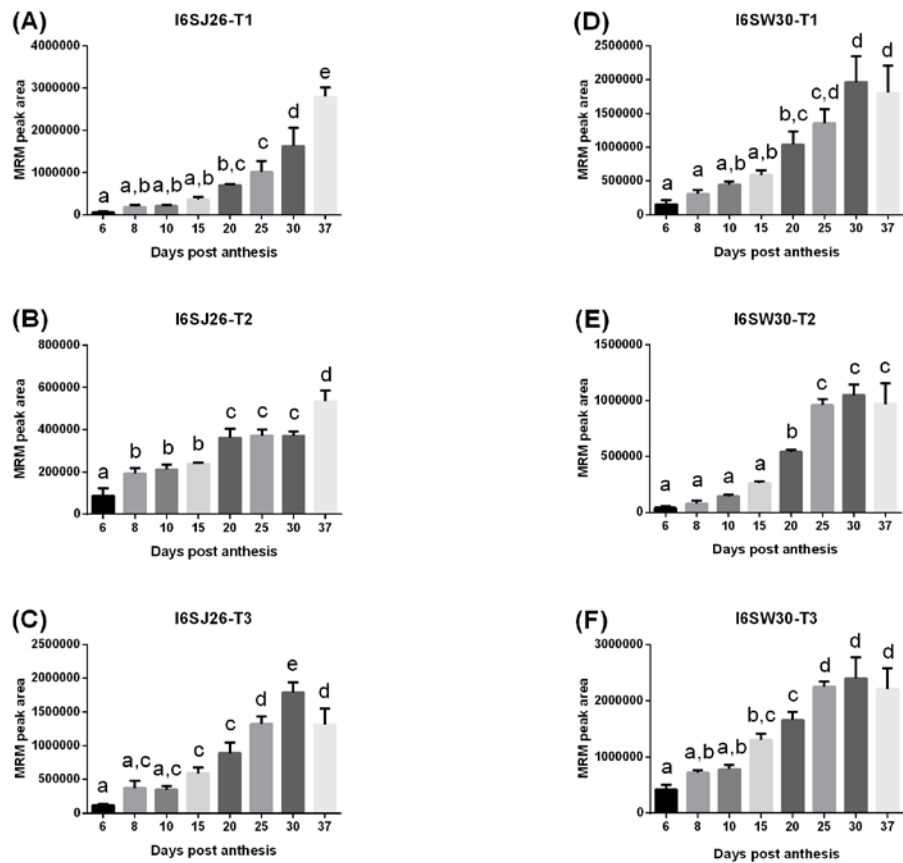

**Figure S4.** The effect of maturity (days post anthesis, DPA) on the accumulation of B3-hordein specific peptides following trypsin cleavage. The mean multiple reaction monitoring (MRM) peak area  $\pm$  SE (n=3) from 5  $\mu$ g extracted protein is shown for the indicated peptide. Within each graph, points with different letters were significantly different at  $p < 0.05$  by one-way ANOVA and Tukey's test.

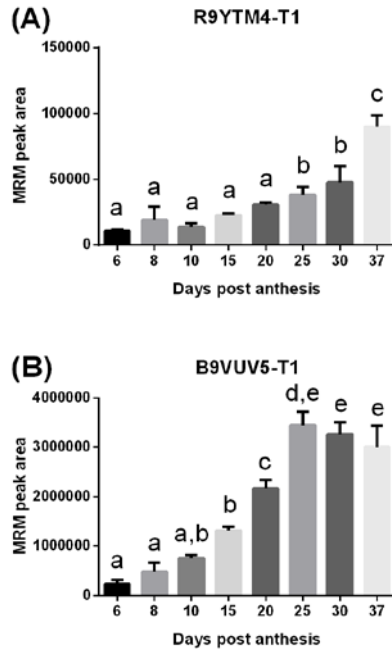

**Figure S5.** The effect of maturity (days post anthesis, DPA) on the accumulation of the indicated B-hordein (identified by mapping peptides to low molecular weight glutenin subunits, LMW-GS) specific peptides following trypsin cleavage. The mean multiple reaction monitoring (MRM) peak area  $\pm$  SE (n=3) from 5  $\mu$ g extracted protein is shown for the indicated peptide. Within each graph, points with different letters were significantly different at  $p < 0.05$  by one-way ANOVA and Tukey's test.

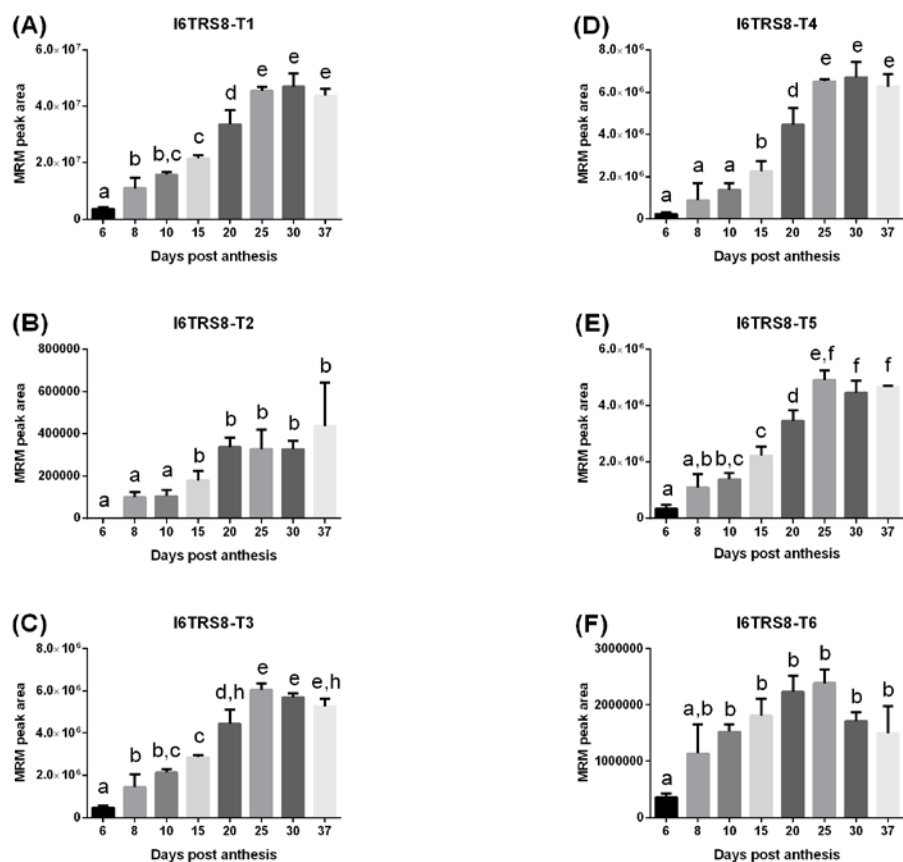

**Figure S6.** The effect of maturity (days post anthesis, DPA) on the accumulation of the indicated D-hordein specific peptides following trypsin cleavage. The mean multiple reaction monitoring (MRM) peak area  $\pm$  SE ( $n=3$ ) from 5  $\mu$ g extracted protein is shown for the indicated peptide. Within each graph, points with different letters were significantly different at  $p<0.05$  by one-way ANOVA and Tukey's test.

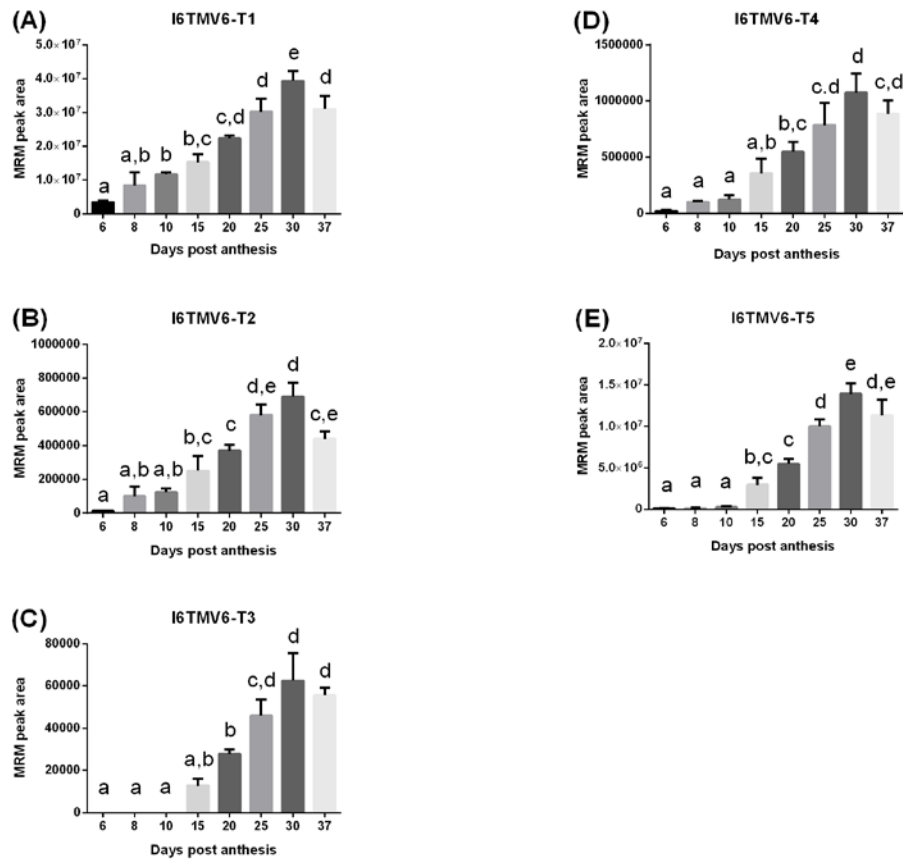

**Figure S7.** The effect of maturity (days post anthesis, DPA) on the accumulation of the indicated gamma-1-hordein specific peptides following trypsin cleavage. The mean multiple reaction monitoring (MRM) peak area  $\pm$  SE (n=3) from 5  $\mu$ g extracted protein is shown for the indicated peptide. Within each graph, points with different letters were significantly different at  $p < 0.05$  by one-way ANOVA and Tukey's test.



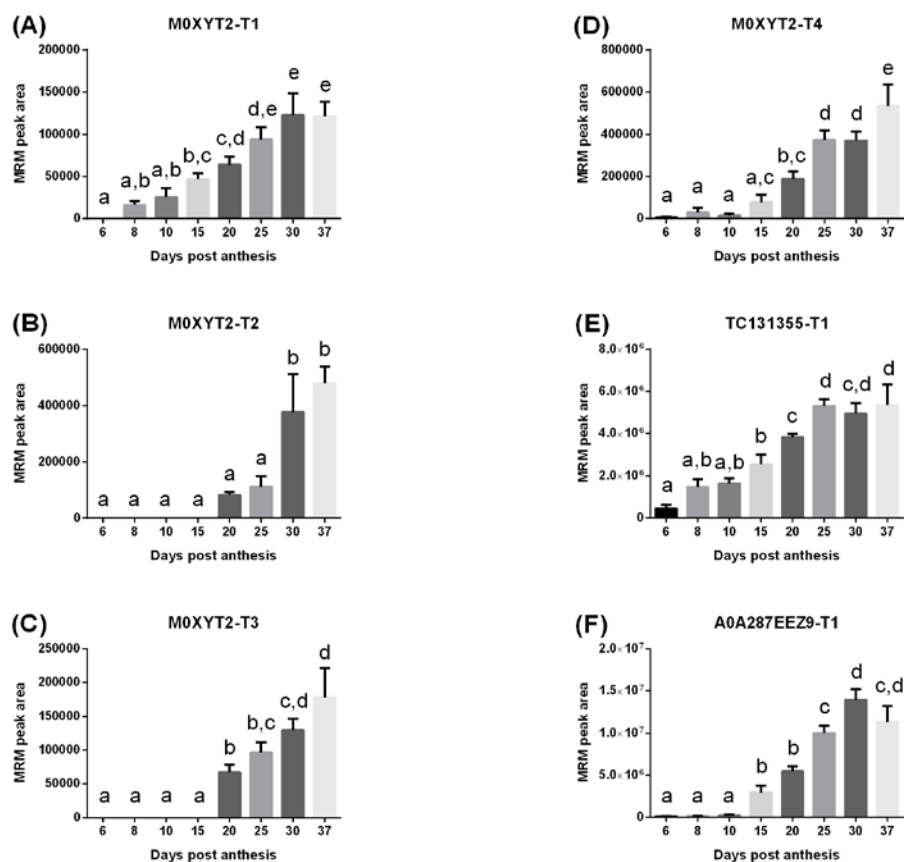

**Figure S8.** The effect of maturity (days post anthesis, DPA) on the accumulation of the indicated gamma-1-hordein specific peptides following trypsin cleavage. The mean multiple reaction monitoring (MRM) peak area  $\pm$  SE (n=3) from 5  $\mu$ g extracted protein is shown for the indicated peptide. Within each graph, points with different letters were significantly different at  $p < 0.05$  by one-way ANOVA and Tukey's test.

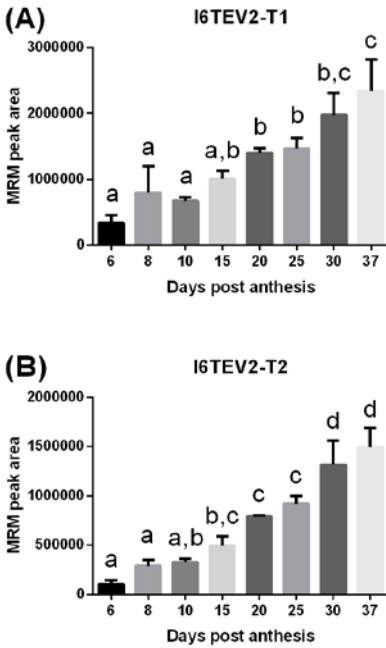

**Figure S9.** The effect of maturity (days post anthesis, DPA) on the accumulation of the indicated gamma-3-hordein specific peptides following trypsin cleavage. The mean multiple reaction monitoring (MRM) peak area  $\pm$  SE (n=3) from 5  $\mu$ g extracted protein is shown for the indicated peptide. Within each graph, points with different letters were significantly different at  $p < 0.05$  by one-way ANOVA and Tukey's test.

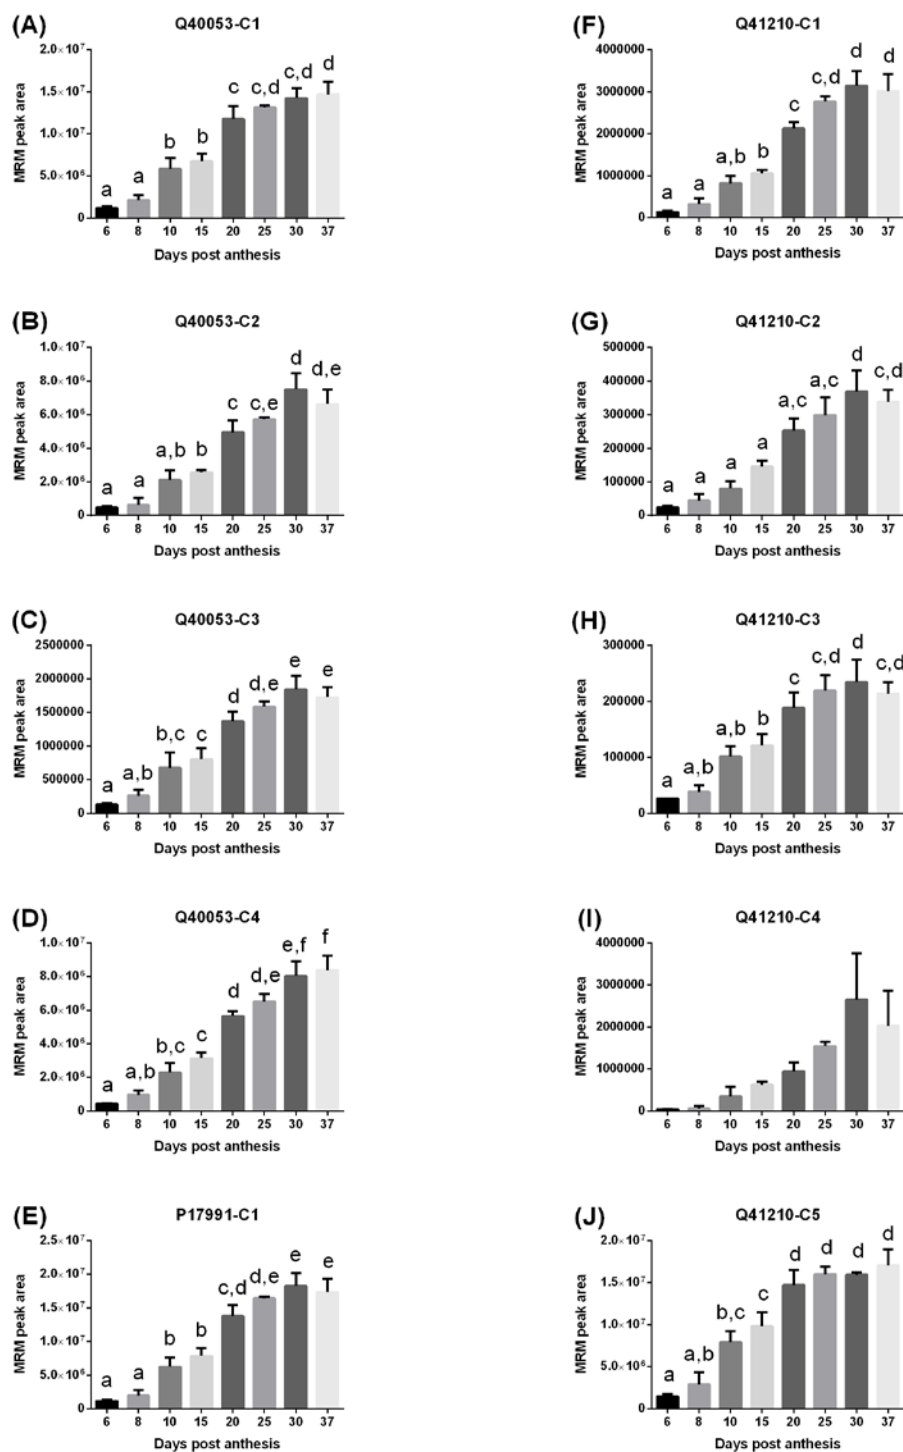

**Figure S10.** The effect of maturity (days post anthesis, DPA) on the accumulation of the indicated C-hordein specific peptides following chymotrypsin cleavage. The mean multiple reaction monitoring (MRM) peak area  $\pm$  SE (n=3) from 5  $\mu$ g extracted protein is shown for the indicated peptide. Within each graph, points with different letters were significantly different at  $p < 0.05$  by one-way ANOVA and Tukey's test.
