# Supplementary material for: Hordein Accumulation in Developing Barley Grains
Source: PubMed Central journal article supplement (PMC6532529; doi:10.3389/fpls.2019.00649), 2019-05-16
Supplement: Data_Sheet_2.pdf [file Data_Sheet_2.pdf]

**Table S1.** Proteins identified in developing endosperm of barley cv Sloop after trypsin digestion.

| N  | Unused | Total | % Cov (95) | Accession     | Name                                                                   | Species                        | Peptides (95%) | Alternate Accession | Alternate Accession | Alternate Accession |
|----|--------|-------|------------|---------------|------------------------------------------------------------------------|--------------------------------|----------------|---------------------|---------------------|---------------------|
| 1  | 24.63  | 24.63 | 38.10      | sp P06293     | Serpin-Z4                                                              | <i>Hordeum vulgare</i>         | 22             |                     |                     |                     |
| 2  | 18.26  | 18.26 | 18.21      | tr Q03678     | Embryo globulin                                                        | <i>Hordeum vulgare</i>         | 16             |                     |                     |                     |
| 3  | 17.02  | 17.14 | 28.61      | tr I6TRS8     | D-hordein                                                              | <i>Hordeum vulgare</i>         | 16             |                     |                     |                     |
| 4  | 16.21  | 16.21 | 32.51      | sp TRY1_B     | Trypsin                                                                | <i>Bos taurus</i>              | 23             |                     |                     |                     |
| 5  | 15.04  | 15.10 | 21.43      | tr A9Q2Q5     | Putative late embryogenesis abundant protein                           | <i>Hordeum vulgare</i>         | 9              |                     |                     |                     |
| 6  | 14.87  | 15.02 | 27.67      | tr I6TMW0     | B1-hordein                                                             | <i>Hordeum vulgare</i>         | 17             | tr I6TRT2           | tr I6SW25           | tr I6SJ22           |
| 7  | 13.10  | 13.10 | 8.67       | sp P31922     | Sucrose synthase 1                                                     | <i>Hordeum vulgare</i>         | 9              |                     |                     |                     |
| 8  | 12.89  | 12.91 | 15.70      | tr F2D5B2     | ATP synthase subunit beta                                              | <i>Hordeum vulgare</i>         | 12             |                     |                     |                     |
| 9  | 12.30  | 12.31 | 26.26      | tr F2CXT7     | Fructose-bisphosphate aldolase                                         | <i>Hordeum vulgare</i>         | 13             |                     |                     |                     |
| 10 | 11.93  | 11.93 | 13.03      | tr Q7YMS3     | Ribulose biphosphate carboxylase large chain                           | <i>Hordeum chilense</i>        | 10             |                     |                     |                     |
| 11 | 11.88  | 11.96 | 23.95      | tr A0A287SR97 | Uncharacterized protein (Serpin Z7)                                    | <i>Hordeum vulgare</i>         | 9              |                     |                     |                     |
| 12 | 11.09  | 11.15 | 27.21      | tr I6TMV6     | Gamma-1-hordein                                                        | <i>Hordeum vulgare</i>         | 6              |                     |                     |                     |
| 13 | 11.05  | 11.14 | 44.66      | tr F2EHF8     | Predicted protein (Triosephosphate isomerase)                          | <i>Hordeum vulgare</i>         | 6              |                     |                     |                     |
| 14 | 10.15  | 10.16 | 16.18      | sp P80284     | Protein disulfide-isomerase                                            | <i>Hordeum vulgare</i>         | 9              |                     |                     |                     |
| 15 | 9.62   | 9.63  | 11.51      | tr A0A287XP46 | Uncharacterized protein (Elongation factor 2)                          | <i>Hordeum vulgare</i>         | 11             |                     |                     |                     |
| 16 | 8.66   | 8.67  | 10.36      | tr F2CS69     | Pyrophosphate-fructose 6-phosphate 1-phosphotransferase subunit beta   | <i>Hordeum vulgare</i>         | 4              |                     |                     |                     |
| 17 | 8.26   | 8.32  | 18.32      | tr U5NIU3     | Beta-amylase                                                           | <i>Hordeum vulgare</i>         | 5              |                     |                     |                     |
| 18 | 8.26   | 8.27  | 7.40       | tr A0A287     | Sucrose synthase                                                       | <i>Hordeum vulgare</i>         | 5              |                     |                     |                     |
| 19 | 8.23   | 8.23  | 20.05      | tr M0XUU4     | Uncharacterized protein (Globulin-1 S allele)                          | <i>Hordeum vulgare</i>         | 10             |                     |                     |                     |
| 20 | 8.01   | 8.01  | 18.26      | tr A0A287M898 | Uncharacterized protein (Thiamine thiazole synthase, chloroplastic)    | <i>Hordeum vulgare</i>         | 7              |                     |                     |                     |
| 21 | 7.78   | 7.94  | 17.58      | tr F2CSK4     | Predicted protein (Glucose and ribitol dehydrogenase-like protein)     | <i>Hordeum vulgare</i>         | 5              |                     |                     |                     |
| 22 | 7.77   | 7.91  | 20.64      | tr M0XLC4     | Uncharacterized protein (Adenosine kinase 2)                           | <i>Hordeum vulgare</i>         | 6              |                     |                     |                     |
| 23 | 7.16   | 7.44  | 15.03      | tr M0USC9     | Aspartate aminotransferase                                             | <i>Hordeum vulgare</i>         | 5              |                     |                     |                     |
| 24 | 6.61   | 6.77  | 4.65       | tr F2EBM4     | Predicted protein (Vicilin-like antimicrobial peptides 2-2)            | <i>Hordeum vulgare</i>         | 6              |                     |                     |                     |
| 25 | 6.22   | 6.23  | 7.18       | tr F2D4A4     | Predicted protein (60S ribosomal protein L4)                           | <i>Hordeum vulgare</i>         | 3              |                     |                     |                     |
| 26 | 6.14   | 12.22 | 51.45      | TC138764_F1   | B1-hordein                                                             | <i>Hordeum vulgare</i>         | 16             | tr Q40022           | tr A0A287EFE1       | sp P06470           |
| 27 | 6.12   | 6.20  | 17.04      | tr I1H7F9     | Uncharacterized protein (Enolase)                                      | <i>Brachypodium distachyon</i> | 5              |                     |                     |                     |
| 28 | 6.08   | 6.16  | 8.51       | tr F2DCE3     | Pyruvate, phosphate dikinase                                           | <i>Hordeum vulgare</i>         | 4              |                     |                     |                     |
| 29 | 6.01   | 6.01  | 4.98       | tr F2EFW5     | Predicted protein (Pyrophosphate-energized vacuolar membrane proton pu | <i>Hordeum vulgare</i>         | 4              |                     |                     |                     |
| 30 | 6.00   | 6.00  | 10.58      | tr Q40069     | Peroxidase                                                             | <i>Hordeum vulgare</i>         | 3              |                     |                     |                     |
| 31 | 6.00   | 6.00  | 13.16      | tr F2EC88     | Predicted protein (Rab28 protein)                                      | <i>Hordeum vulgare</i>         | 7              |                     |                     |                     |
| 32 | 5.51   | 5.62  | 12.89      | tr Q4LB20     | Adenosylhomocysteinase                                                 | <i>Hordeum vulgare</i>         | 4              |                     |                     |                     |
| 33 | 5.39   | 5.46  | 11.11      | tr F2D4W6     | Malate dehydrogenase                                                   | <i>Hordeum vulgare</i>         | 3              |                     |                     |                     |
| 34 | 5.29   | 5.43  | 18.80      | tr I1IRI1     | Uncharacterized protein (60S ribosomal protein L32-1)                  | <i>Brachypodium distachyon</i> | 4              |                     |                     |                     |
| 35 | 5.20   | 5.27  | 8.99       | tr U6A1T2     | Glucose-1-phosphate adenylyltransferase                                | <i>Hordeum vulgare</i>         | 3              |                     |                     |                     |
| 36 | 4.79   | 4.84  | 6.14       | tr M0XQ24     | Uncharacterized protein (Phosphoglucomutase, cytoplasmic)              | <i>Hordeum vulgare</i>         | 4              |                     |                     |                     |
| 37 | 4.48   | 4.52  | 19.18      | sp P16968     | Alpha-amylase inhibitor BMAI-1 (Fragment)                              | <i>Hordeum vulgare</i>         | 6              |                     |                     |                     |
| 38 | 4.20   | 4.23  | 4.54       | tr A0A287V373 | Uncharacterized protein (Putative aspartic peptidase A1 family)        | <i>Hordeum vulgare</i>         | 2              |                     |                     |                     |
| 39 | 4.09   | 4.10  | 4.66       | tr M0Z2X3     | Phosphoglycerate kinase                                                | <i>Hordeum vulgare</i>         | 2              |                     |                     |                     |
| 40 | 4.07   | 4.09  | 4.61       | tr Q40058     | HSP70                                                                  | <i>Hordeum vulgare</i>         | 3              |                     |                     |                     |
| 41 | 4.05   | 4.06  | 9.77       | tr A0A287SBS0 | Uncharacterized protein (Late embryogenesis protein D-34-like)         | <i>Hordeum vulgare</i>         | 3              |                     |                     |                     |
| 42 | 4.02   | 4.02  | 3.99       | tr F2DCS7     | Ketol-acid reductoisomerase                                            | <i>Hordeum vulgare</i>         | 3              |                     |                     |                     |
| 43 | 4.02   | 4.02  | 4.77       | sp P52894     | Alanine aminotransferase 2                                             | <i>Hordeum vulgare</i>         | 2              |                     |                     |                     |
| 44 | 4.00   | 4.00  | 7.16       | tr M0XTF9     | Uncharacterized protein (T-complex protein 1 subunit alpha)            | <i>Hordeum vulgare</i>         | 2              |                     |                     |                     |
| 45 | 4.01   | 4.01  | 6.13       | tr M0YIA7     | Isocitrate dehydrogenase [NADP]                                        | <i>Hordeum vulgare</i>         | 2              |                     |                     |                     |
| 46 | 4.00   | 18.26 | 18.21      | tr Q03678     | Embryo globulin                                                        | <i>Hordeum vulgare</i>         | 16             |                     |                     |                     |

|    |      |      |       |               |                                                                         |                            |   |               |               |
|----|------|------|-------|---------------|-------------------------------------------------------------------------|----------------------------|---|---------------|---------------|
| 47 | 4.00 | 8.00 | 18.08 | tr A0A287EJ06 | Uncharacterized protein (B-hordein)                                     | <i>Hordeum vulgare</i>     | 6 | tr A0A287EI23 | tr A0A287EIW5 |
| 48 | 4.00 | 4.00 | 7.73  | tr M0X5Z1     | Uncharacterized protein (Eukaryotic initiation factor 4A)               | <i>Hordeum vulgare</i>     | 2 |               |               |
| 49 | 4.00 | 4.00 | 11.87 | tr F2DH85     | 60S acidic ribosomal protein P0                                         | <i>Hordeum vulgare</i>     | 2 |               |               |
| 50 | 4.00 | 4.00 | 7.64  | tr M0XSQ4     | Uncharacterized protein (Succinate-semialdehyde dehydrogenase)          | <i>Hordeum vulgare</i>     | 2 |               |               |
| 51 | 4.00 | 4.00 | 8.39  | tr F2E520     | Predicted protein (Uridine 5'-monophosphate synthase)                   | <i>Hordeum vulgare</i>     | 2 |               |               |
| 52 | 4.00 | 4.00 | 19.25 | tr M0UL57     | Eukaryotic translation initiation factor 5A                             | <i>Hordeum vulgare</i>     | 2 |               |               |
| 53 | 4.00 | 4.00 | 4.29  | sp P29114     | Linoleate 9S-lipoxygenase 1                                             | <i>Hordeum vulgare</i>     | 2 |               |               |
| 54 | 4.00 | 4.00 | 11.88 | tr F2EEQ1     | Predicted protein                                                       | <i>Hordeum vulgare</i>     | 2 |               |               |
| 55 | 4.00 | 4.00 | 6.63  | tr F2ECH4     | Predicted protein (Late embryogenesis abundant protein)                 | <i>Hordeum vulgare</i>     | 2 |               |               |
| 56 | 4.00 | 4.00 | 8.07  | tr F2DIC8     | Predicted protein (Hydroxyproline-rich glycoprotein family protein)     | <i>Hordeum vulgare</i>     | 2 |               |               |
| 57 | 4.00 | 4.00 | 14.49 | tr F2D4L0     | Predicted protein (Glutathione transferase F5)                          | <i>Hordeum vulgare</i>     | 3 |               |               |
| 58 | 4.00 | 4.00 | 11.06 | tr F2CVV8     | Superoxide dismutase                                                    | <i>Hordeum vulgare</i>     | 2 |               |               |
| 59 | 2.00 | 2.00 | 6.55  | tr M0YB08     | 4-hydroxy-4-methyl-2-oxoglutarate aldolase                              | <i>Hordeum vulgare</i>     | 1 |               |               |
| 60 | 4.00 | 4.00 | 17.01 | sp K1C9_HUMAN | Keratin                                                                 | <i>Homo sapiens</i>        | 3 |               |               |
| 61 | 3.75 | 4.03 | 14.54 | tr F2CUE9     | Glyceraldehyde-3-phosphate dehydrogenase                                | <i>Hordeum vulgare</i>     | 4 |               |               |
| 62 | 3.68 | 3.90 | 22.16 | tr M0XYT2     | Uncharacterized protein (Gamma-1-hordein)                               | <i>Hordeum vulgare</i>     | 3 |               |               |
| 63 | 3.62 | 3.77 | 7.56  | tr F2CQP8     | Predicted protein (Lactoylglutathione lyase)                            | <i>Hordeum vulgare</i>     | 2 |               |               |
| 64 | 3.53 | 3.68 | 5.72  | tr M0Z4F0     | Uncharacterized protein (Nucleoredoxin)                                 | <i>Hordeum vulgare</i>     | 2 |               |               |
| 65 | 3.47 | 3.62 | 3.42  | sp K2C1_HUMAN | Keratin                                                                 | <i>Homo sapiens</i>        | 2 |               |               |
| 66 | 3.35 | 3.42 | 14.71 | tr A0A287H7K0 | Uncharacterized protein (Ricin B-like lectin R40G3)                     | <i>Hordeum vulgare</i>     | 2 |               |               |
| 67 | 3.21 | 3.31 | 5.26  | tr F2EGL4     | Predicted protein (Eukaryotic peptide chain release factor subunit 1-3) | <i>Hordeum vulgare</i>     | 2 |               |               |
| 68 | 3.17 | 3.28 | 8.02  | sp Q43470     | 14-3-3-like protein B                                                   | <i>Hordeum vulgare</i>     | 2 |               |               |
| 69 | 2.99 | 3.10 | 9.13  | tr F2E7Q3     | Predicted protein                                                       | <i>Hordeum vulgare</i>     | 2 |               |               |
| 70 | 2.92 | 3.06 | 11.94 | tr V9SHG4     | Starch synthase, chloroplastic/amyloplastic                             | <i>Hordeum vulgare</i>     | 4 |               |               |
| 71 | 2.80 | 2.89 | 23.31 | tr F2ELX8     | Predicted protein (Chitinase)                                           | <i>Hordeum vulgare</i>     | 4 |               |               |
| 72 | 2.80 | 2.89 | 19.05 | tr M0WF11     | Uncharacterized protein (Defensin Tm-AMP-D1.2)                          | <i>Hordeum vulgare</i>     | 4 |               |               |
| 73 | 2.62 | 2.70 | 6.81  | tr F2D807     | D-3-phosphoglycerate dehydrogenase                                      | <i>Hordeum vulgare</i>     | 2 |               |               |
| 74 | 2.60 | 2.63 | 12.84 | tr F2EG53     | Predicted protein (Elongation factor 1-beta)                            | <i>Hordeum vulgare</i>     | 2 |               |               |
| 75 | 2.44 | 2.47 | 8.08  | tr F2CUW7     | Predicted protein (Universal stress protein A-like protein)             | <i>Hordeum vulgare</i>     | 2 |               |               |
| 76 | 2.41 | 2.53 | 7.01  | tr F2E9N0     | Predicted protein (12S seed storage globulin 1)                         | <i>Hordeum vulgare</i>     | 3 |               |               |
| 77 | 2.41 | 2.44 | 6.60  | tr F2D6B1     | Predicted protein (Dehydroascorbate reductase)                          | <i>Hordeum vulgare</i>     | 1 |               |               |
| 78 | 2.32 | 2.35 | 6.22  | tr R7W2E9     | ATP synthase subunit alpha                                              | <i>Aegilops tauschii</i>   | 2 |               |               |
| 79 | 2.19 | 2.21 | 2.59  | tr A0A287VFE1 | Uncharacterized protein (Chaperonin 60-like protein)                    | <i>Hordeum vulgare</i>     | 1 |               |               |
| 80 | 2.17 | 2.18 | 3.64  | tr F2DMV0     | Aminopeptidase                                                          | <i>Hordeum vulgare</i>     | 2 |               |               |
| 81 | 2.11 | 2.12 | 22.22 | sp P07597     | Non-specific lipid-transfer protein 1                                   | <i>Hordeum vulgare</i>     | 2 |               |               |
| 82 | 2.11 | 2.12 | 12.67 | tr Q96458     | 17 kDa class I small heat shock protein                                 | <i>Hordeum vulgare</i>     | 1 |               |               |
| 83 | 2.09 | 2.10 | 2.34  | tr F2CS40     | Aconitate hydratase                                                     | <i>Hordeum vulgare</i>     | 1 |               |               |
| 84 | 2.08 | 5.82 | 7.34  | tr A0A1W6S456 | Ribulose bisphosphate carboxylase large chain                           | <i>Nassella trichotoma</i> | 4 |               |               |
| 85 | 2.08 | 2.09 | 11.41 | tr Q43769     | Oleolin                                                                 | <i>Hordeum vulgare</i>     | 5 |               |               |
| 86 | 2.03 | 2.04 | 2.82  | tr Q6E5A5     | Plastidial ADP-glucose transporter                                      | <i>Hordeum vulgare</i>     | 1 |               |               |
| 87 | 2.03 | 2.03 | 1.63  | tr M0WX05     | Uncharacterized protein (Selenium-binding protein 1)                    | <i>Hordeum vulgare</i>     | 1 |               |               |
| 88 | 2.02 | 2.03 | 6.76  | tr F2EDI8     | Predicted protein                                                       | <i>Hordeum vulgare</i>     | 1 |               |               |
| 89 | 2.00 | 2.00 | 8.40  | tr F2EC14     | Predicted protein (60S ribosomal protein L22-2)                         | <i>Hordeum vulgare</i>     | 1 |               |               |
| 90 | 2.02 | 2.02 | 5.78  | tr B5TWK6     | rRNA N-glycosidase                                                      | <i>Hordeum vulgare</i>     | 1 |               |               |
| 91 | 2.00 | 7.13 | 10.04 | tr S4Z8E1     | ATP synthase subunit beta, chloroplastic                                | <i>Hordeum vulgare</i>     | 4 |               |               |
| 92 | 2.01 | 4.01 | 3.96  | tr M0YC50     | Uncharacterized protein (Cullin-associated NEDD8-dissociated protein 1) | <i>Hordeum vulgare</i>     | 3 |               |               |
| 93 | 2.01 | 2.02 | 2.13  | tr F2E4C2     | Predicted protein (HSP70)                                               | <i>Hordeum vulgare</i>     | 1 |               |               |
| 94 | 2.01 | 2.01 | 20.27 | sp P01086     | Trypsin inhibitor CMe                                                   | <i>Hordeum vulgare</i>     | 3 |               |               |
| 95 | 2.01 | 2.01 | 6.71  | tr A5CFZ1     | Tubulin beta chain                                                      | <i>Hordeum vulgare</i>     | 3 |               |               |

|     |      |       |       |               |                                                                                  |                          |   |
|-----|------|-------|-------|---------------|----------------------------------------------------------------------------------|--------------------------|---|
| 96  | 2.01 | 2.01  | 7.90  | tr F2DHH7     | Superoxide dismutase [Cu-Zn]                                                     | <i>Hordeum vulgare</i>   | 1 |
| 97  | 2.01 | 2.01  | 1.75  | tr M0YIZ9     | Uncharacterized protein (2-isopropylmalate synthase A)                           | <i>Hordeum vulgare</i>   | 1 |
| 98  | 2.00 | 12.91 | 15.79 | tr F2DJJ2     | ATP synthase subunit beta                                                        | <i>Hordeum vulgare</i>   | 7 |
| 99  | 2.00 | 7.91  | 20.87 | tr A0A1D6AK65 | Uncharacterized protein (Adenosine kinase 2)                                     | <i>Triticum aestivum</i> | 5 |
| 100 | 2.00 | 6.00  | 13.46 | sp P82993     | Beta-amylase                                                                     | <i>Hordeum vulgare</i>   | 4 |
| 101 | 2.00 | 2.06  | 3.36  | tr Q850M2     | Phosphoglycerate kinase (Fragment)                                               | <i>Hordeum vulgare</i>   | 1 |
| 102 | 2.00 | 4.00  | 6.10  | tr A0A287GN26 | Uncharacterized protein (Aspartic proteinase)                                    | <i>Hordeum vulgare</i>   | 2 |
| 103 | 2.00 | 4.00  | 5.20  | tr A0A1Z5R0W2 | Uncharacterized protein (NADPH-dependent aldehyde reductase 1)                   | <i>Sorghum bicolor</i>   | 3 |
| 104 | 2.00 | 2.44  | 6.57  | tr A0A2C9PGJ2 | Dehydroascorbate reductase 2                                                     | <i>Eleusine coracana</i> | 1 |
| 105 | 2.00 | 2.12  | 12.58 | tr F2DGA8     | Predicted protein (Small heat shock protein 16.9 kDa)                            | <i>Hordeum vulgare</i>   | 1 |
| 106 | 2.00 | 2.04  | 6.08  | tr A0A287VKP6 | Uncharacterized protein (Enolase 1)                                              | <i>Hordeum vulgare</i>   | 1 |
| 107 | 2.00 | 2.00  | 1.84  | tr W5GD60     | Uncharacterized protein (RuBisCO large subunit-binding protein subunit beta)     | <i>Triticum aestivum</i> | 1 |
| 108 | 2.00 | 2.00  | 2.97  | tr M0XJL4     | Uncharacterized protein (Alpha-1,4-glucan-protein synthase)                      | <i>Hordeum vulgare</i>   | 1 |
| 109 | 2.00 | 2.00  | 2.58  | tr M0Z8C6     | Predicted protein (Heat shock protein 70)                                        | <i>Hordeum vulgare</i>   | 1 |
| 110 | 2.00 | 2.00  | 5.38  | tr F2EL01     | Predicted protein (LEA protein)                                                  | <i>Hordeum vulgare</i>   | 1 |
| 111 | 2.00 | 2.00  | 4.74  | tr A0A287I5P1 | Uncharacterized protein (Oxygen-evolving enhancer protein 2)                     | <i>Hordeum vulgare</i>   | 1 |
| 112 | 2.00 | 2.00  | 3.93  | tr M0USG5     | Uncharacterized protein (ATP-dependent 6-phosphofructokinase)                    | <i>Hordeum vulgare</i>   | 1 |
| 113 | 2.00 | 2.00  | 3.25  | tr F2D7C4     | 3-ketoacyl-CoA synthase                                                          | <i>Hordeum vulgare</i>   | 1 |
| 114 | 2.00 | 2.00  | 2.51  | tr F2CYL7     | Predicted protein (Vicilin-like antimicrobial peptides 2-2)                      | <i>Hordeum vulgare</i>   | 4 |
| 115 | 2.00 | 2.00  | 36.00 | tr Q5S741     | Chloroplast acetyl-CoA carboxylase (Fragment)                                    | <i>Hordeum vulgare</i>   | 1 |
| 116 | 2.00 | 2.00  | 7.43  | tr F2E2L5     | Predicted protein (Putative calcium-binding protein CML7)                        | <i>Hordeum vulgare</i>   | 1 |
| 117 | 2.00 | 2.00  | 5.73  | tr F2CQY1     | Predicted protein (Putative 40S ribosomal protein)                               | <i>Hordeum vulgare</i>   | 2 |
| 118 | 2.00 | 2.00  | 4.12  | sp P35266     | 60S ribosomal protein L17-1                                                      | <i>Hordeum vulgare</i>   | 1 |
| 119 | 2.00 | 2.00  | 9.04  | tr F2DEP3     | Predicted protein (60S ribosomal protein L12)                                    | <i>Hordeum vulgare</i>   | 1 |
| 120 | 2.00 | 2.00  | 2.99  | tr F2D1P1     | Predicted protein (60S ribosomal protein L5)                                     | <i>Hordeum vulgare</i>   | 1 |
| 121 | 2.00 | 2.00  | 4.74  | tr F2DHU6     | Pyruvate kinase                                                                  | <i>Hordeum vulgare</i>   | 1 |
| 122 | 2.00 | 2.00  | 4.66  | tr F2CRK4     | Predicted protein (Enoyl-[acyl-carrier-protein] reductase)                       | <i>Hordeum vulgare</i>   | 1 |
| 123 | 2.00 | 2.00  | 3.30  | tr M0YNH1     | Uncharacterized protein (Cinnamyl alcohol dehydrogenase)                         | <i>Hordeum vulgare</i>   | 1 |
| 124 | 2.00 | 2.00  | 1.59  | tr Q9XEI3     | Beta-D-glucan exohydrolase isoenzyme Exol                                        | <i>Hordeum vulgare</i>   | 1 |
| 125 | 2.00 | 2.00  | 9.09  | tr M0WDD3     | Predicted protein (Triosephosphate isomerase, chloroplastic)                     | <i>Hordeum vulgare</i>   | 1 |
| 126 | 2.00 | 2.00  | 6.78  | tr F2DC21     | Predicted protein (Wal17 protein)                                                | <i>Hordeum vulgare</i>   | 1 |
| 127 | 2.00 | 2.00  | 21.21 | tr A0A287XZK0 | Uncharacterized protein                                                          | <i>Hordeum vulgare</i>   | 1 |
| 128 | 2.00 | 2.00  | 6.17  | tr F2EI14     | Predicted protein (17.5 kDa heat shock protei)                                   | <i>Hordeum vulgare</i>   | 1 |
| 129 | 2.00 | 2.00  | 3.93  | tr F2EAD0     | Predicted protein (Calcium-dependent lipid-binding (CaLB domain) family protein) | <i>Hordeum vulgare</i>   | 1 |
| 130 | 2.00 | 2.00  | 7.20  | tr O23983     | Ascorbate peroxidase                                                             | <i>Hordeum vulgare</i>   | 1 |
| 131 | 2.00 | 2.00  | 6.64  | tr F2DCF7     | Predicted protein (Sapasin-like type B, region 1 family protein)                 | <i>Hordeum vulgare</i>   | 1 |
| 132 | 2.00 | 2.00  | 3.68  | tr F2CRB4     | Eukaryotic translation initiation factor 3 subunit I                             | <i>Hordeum vulgare</i>   | 1 |
| 133 | 2.00 | 2.00  | 1.28  | tr M0X5Q3     | Uncharacterized protein (Carbamoyl-phosphate synthase large chain)               | <i>Hordeum vulgare</i>   | 1 |
| 134 | 2.00 | 2.00  | 12.96 | tr F2EFB1     | Predicted protein                                                                | <i>Hordeum vulgare</i>   | 1 |
| 135 | 2.00 | 2.00  | 4.81  | tr F2CQQ1     | Predicted protein (2-dehydro-3-deoxyphosphooctonate aldolase,)                   | <i>Hordeum vulgare</i>   | 1 |
| 136 | 2.00 | 2.00  | 4.30  | tr A0A287IB81 | Eukaryotic translation initiation factor 3 subunit H                             | <i>Hordeum vulgare</i>   | 1 |
| 137 | 2.00 | 2.00  | 2.19  | tr F2E7L1     | Histone H4                                                                       | <i>Hordeum vulgare</i>   | 1 |
| 138 | 2.00 | 2.00  | 9.18  | tr A0A287LGK8 | Uncharacterized protein (26S protease regulatory subunit 6B)                     | <i>Hordeum vulgare</i>   | 1 |
| 139 | 2.00 | 2.00  | 15.28 | tr O82688     | Amino acid selective channel protein                                             | <i>Hordeum vulgare</i>   | 1 |
| 140 | 2.00 | 2.00  | 8.85  | tr F2DAK8     | Predicted protein (60S acidic ribosomal protein P2A)                             | <i>Hordeum vulgare</i>   | 1 |
| 141 | 2.00 | 2.00  | 15.60 | tr M0WY98     | 40S ribosomal protein S7                                                         | <i>Hordeum vulgare</i>   | 1 |
| 142 | 2.00 | 2.00  | 26.53 | tr Q50J89     | Putative eukaryotic translation initiation factor (Iso)4E (Fragment)             | <i>Hordeum vulgare</i>   | 1 |
| 143 | 2.00 | 2.00  | 2.53  | tr M0UL82     | Uncharacterized protein (Argininosuccinate synthase)                             | <i>Hordeum vulgare</i>   | 1 |
| 144 | 2.00 | 2.00  | 9.43  | tr B5TWD1     | Late embryogenesis abundant protein                                              | <i>Hordeum vulgare</i>   | 1 |

|     |      |      |       |               |                                                                       |                          |   |
|-----|------|------|-------|---------------|-----------------------------------------------------------------------|--------------------------|---|
| 145 | 2.00 | 2.00 | 12.90 | trjH2E688     | Late embryogenesis abundant protein                                   | <i>Hordeum vulgare</i>   | 1 |
| 146 | 2.00 | 2.00 | 9.45  | trjA0A287VV58 | Uncharacterized protein (40S ribosomal protein S20)                   | <i>Hordeum vulgare</i>   | 1 |
| 147 | 2.00 | 2.00 | 13.58 | trjM0VAW5     | Uncharacterized protein (Thioredoxin)                                 | <i>Hordeum vulgare</i>   | 1 |
| 148 | 2.00 | 2.00 | 4.58  | spjP29305     | 14-3-3-like protein A                                                 | <i>Hordeum vulgare</i>   | 1 |
| 149 | 2.00 | 2.00 | 4.33  | trjM0YTH4     | Proline iminopeptidase                                                | <i>Hordeum vulgare</i>   | 1 |
| 150 | 2.00 | 2.00 | 5.34  | trjM0UF14     | GTP-binding nuclear protein                                           | <i>Hordeum vulgare</i>   | 1 |
| 151 | 2.00 | 2.00 | 2.88  | trjF2D6W5     | Ribosomal protein                                                     | <i>Hordeum vulgare</i>   | 1 |
| 152 | 2.00 | 2.00 | 5.69  | trjF2CPR3     | Pyruvate dehydrogenase E1 component subunit beta                      | <i>Hordeum vulgare</i>   | 1 |
| 153 | 2.00 | 2.00 | 6.22  | trjF2D483     | 40S ribosomal protein S8                                              | <i>Hordeum vulgare</i>   | 1 |
| 154 | 2.00 | 2.00 | 2.64  | trjQ94L27     | Alcohol dehydrogenase                                                 | <i>Hordeum vulgare</i>   | 1 |
| 155 | 2.00 | 2.00 | 7.04  | trjQ8S409     | Hordoindoline A-1 (Fragment)                                          | <i>Hordeum vulgare</i>   | 1 |
| 156 | 2.00 | 2.00 | 1.50  | trjQ8H1Y8     | Starch synthase, chloroplastic/amyloplastic                           | <i>Hordeum vulgare</i>   | 1 |
| 157 | 2.00 | 2.00 | 2.19  | trjQ7XZK6     | Starch branching enzyme I (Fragment)                                  | <i>Hordeum vulgare</i>   | 1 |
| 158 | 2.00 | 2.00 | 4.36  | trjF2DZ70     | Aminomethyltransferase                                                | <i>Hordeum vulgare</i>   | 2 |
| 159 | 2.00 | 2.00 | 3.55  | trjM0V752     | Obg-like ATPase 1                                                     | <i>Hordeum vulgare</i>   | 1 |
| 160 | 2.00 | 2.00 | 5.66  | trjF2CWL1     | Predicted protein (Glutathione-S-transferase)                         | <i>Hordeum vulgare</i>   | 1 |
| 161 | 2.00 | 2.00 | 3.01  | trjQ6BCT3     | Methionine synthase                                                   | <i>Hordeum vulgare</i>   | 1 |
| 162 | 2.00 | 2.00 | 6.37  | trjF2CTC0     | Predicted protein (Thioredoxin family Trp26)                          | <i>Hordeum vulgare</i>   | 1 |
| 163 | 2.00 | 2.00 | 3.00  | trjQ4LB12     | Methionine synthase 2 enzyme                                          | <i>Hordeum vulgare</i>   | 1 |
| 164 | 2.00 | 2.00 | 7.59  | trjQ43770     | Oleosin                                                               | <i>Hordeum vulgare</i>   | 1 |
| 165 | 2.00 | 2.00 | 9.02  | trjF2EG29     | Predicted protein (Late embryogenesis abundant protein)               | <i>Hordeum vulgare</i>   | 1 |
| 166 | 2.00 | 2.00 | 3.27  | trjF2EJY5     | 4-alpha-glucanotransferase                                            | <i>Hordeum vulgare</i>   | 1 |
| 167 | 2.00 | 2.00 | 1.89  | trjF2CY68     | Predicted protein (Mitochondrial processing peptidase beta subunit)   | <i>Hordeum vulgare</i>   | 1 |
| 168 | 2.00 | 2.00 | 1.94  | trjA0A287SNS5 | Uncharacterized protein (DEAD-box ATP-dependent RNA helicase 37)      | <i>Hordeum vulgare</i>   | 1 |
| 169 | 2.00 | 2.00 | 1.80  | trjN1QRM3     | Mitochondrial outer membrane porin                                    | <i>Aegilops tauschii</i> | 1 |
| 170 | 2.00 | 2.00 | 2.70  | trjF2CWJ3     | Glyceraldehyde-3-phosphate dehydrogenase                              | <i>Hordeum vulgare</i>   | 1 |
| 171 | 2.00 | 2.00 | 3.94  | trjF2E941     | Predicted protein (Seryl-tRNA synthetase)                             | <i>Hordeum vulgare</i>   | 1 |
| 172 | 2.00 | 2.00 | 2.15  | trjF2E9B5     | Predicted protein                                                     | <i>Hordeum vulgare</i>   | 1 |
| 173 | 2.00 | 2.00 | 0.63  | trjM0WSS9     | Uncharacterized protein (E3 ubiquitin-protein ligase UPL1)            | <i>Hordeum vulgare</i>   | 1 |
| 174 | 2.00 | 2.00 | 6.15  | trjM8BM34     | Uncharacterized protein                                               | <i>Aegilops tauschii</i> | 1 |
| 175 | 2.00 | 2.00 | 6.29  | trjF2DMM2     | Predicted protein (Cytochrome c oxidase subunit 5B)                   | <i>Hordeum vulgare</i>   | 1 |
| 176 | 2.00 | 2.00 | 6.91  | trjM0V0Z2     | Pyruvate kinase                                                       | <i>Hordeum vulgare</i>   | 1 |
| 177 | 2.00 | 2.00 | 1.55  | trjM0XYY6     | Uncharacterized protein (Clathrin heavy chain)                        | <i>Hordeum vulgare</i>   | 1 |
| 178 | 2.00 | 2.00 | 2.43  | trjF2DL78     | Predicted protein (Ubiquitin-like protein)                            | <i>Hordeum vulgare</i>   | 1 |
| 179 | 2.00 | 2.00 | 2.92  | trjM7YC77     | Uncharacterized protein                                               | <i>Triticum urartu</i>   | 1 |
| 180 | 2.00 | 2.00 | 2.25  | trjM0WUE1     | Uncharacterized protein                                               | <i>Hordeum vulgare</i>   | 1 |
| 181 | 2.00 | 2.00 | 4.99  | trjM0VXR8     | Uncharacterized protein                                               | <i>Hordeum vulgare</i>   | 1 |
| 182 | 2.00 | 2.00 | 3.44  | trjF2CRU2     | Predicted protein (11-beta-hydroxysteroid dehydrogenase-like protein) | <i>Hordeum vulgare</i>   | 1 |
| 183 | 2.00 | 2.00 | 13.04 | trjF2EKY7     | Predicted protein                                                     | <i>Hordeum vulgare</i>   | 1 |
| 184 | 2.00 | 2.00 | 1.61  | trjF2ECB2     | Predicted protein (Cytosolic factor-like protein)                     | <i>Hordeum vulgare</i>   | 1 |
| 185 | 2.00 | 2.00 | 4.66  | trjF2E9J4     | Predicted protein                                                     | <i>Hordeum vulgare</i>   | 1 |
| 186 | 2.00 | 2.00 | 2.86  | trjF2E9C4     | Predicted protein                                                     | <i>Hordeum vulgare</i>   | 1 |
| 187 | 2.00 | 2.00 | 7.67  | trjF2E8B4     | Predicted protein (Arabinogalactan protein AGP1)                      | <i>Hordeum vulgare</i>   | 1 |
| 188 | 2.00 | 2.00 | 14.13 | trjF2DPX6     | Predicted protein                                                     | <i>Hordeum vulgare</i>   | 1 |
| 189 | 2.00 | 2.00 | 7.03  | spjQ40066     | Serpin-ZX                                                             | <i>Hordeum vulgare</i>   | 1 |
| 190 | 2.00 | 2.00 | 5.79  | trjA1X809     | 14-3-3D                                                               | <i>Hordeum vulgare</i>   | 1 |
| 191 | 2.00 | 2.00 | 4.72  | trjF2D692     | Predicted protein (Caffeic acid 3-O-methyltransferase)                | <i>Hordeum vulgare</i>   | 1 |
| 192 | 2.00 | 2.00 | 10.74 | spjP04464     | Calmodulin                                                            | <i>Triticum aestivum</i> | 1 |
| 193 | 2.00 | 2.00 | 2.76  | trjB9G8U7     | Uncharacterized protein (Serine/threonine-protein kinase CTR1)        | <i>Oryza sativa</i>      | 1 |

|     |      |      |       |               |                                                                   |                                |   |
|-----|------|------|-------|---------------|-------------------------------------------------------------------|--------------------------------|---|
| 195 | 2.00 | 2.00 | 16.67 | trjA8V4D2     | Chymotrypsin inhibitor-2                                          | <i>Hordeum vulgare</i>         | 1 |
| 196 | 2.00 | 2.00 | 4.07  | trjA0A2T7DFZ0 | Uncharacterized protein                                           | <i>9POAL</i>                   | 1 |
| 198 | 2.00 | 2.00 | 5.35  | trjA0A287P882 | Uncharacterized protein                                           | <i>Hordeum vulgare</i>         | 1 |
| 199 | 2.00 | 2.00 | 3.74  | trjA0A287KCZ7 | Uncharacterized protein                                           | <i>Hordeum vulgare</i>         | 1 |
| 200 | 2.00 | 2.00 | 29.55 | trjA0A1D6F166 | 40S ribosomal protein S3-1                                        | <i>Zea mays</i>                | 1 |
| 201 | 2.00 | 2.00 | 2.97  | trjA0A1B6Q140 | Uncharacterized protein                                           | <i>Sorghum bicolor</i>         | 1 |
| 202 | 2.00 | 2.00 | 4.74  | trjA0A0Q3FXQ0 | Uncharacterized protein                                           | <i>Brachipodium distachyon</i> | 1 |
| 203 | 2.00 | 2.00 | 16.67 | trjA0A0A9E7A7 | Uncharacterized protein                                           | <i>Arundo dorax</i>            | 1 |
| 204 | 2.00 | 2.00 | 2.65  | sp K1C15      | Keratin                                                           | <i>Ovis aries</i>              | 1 |
| 205 | 1.85 | 2.00 | 12.34 | trjM0VKU8     | 6,7-dimethyl-8-ribityllumazine synthase                           | <i>Hordeum vulgare</i>         | 1 |
| 206 | 1.72 | 2.00 | 3.75  | trjF2DFP6     | Predicted protein                                                 | <i>Hordeum vulgare</i>         | 1 |
| 207 | 1.72 | 2.00 | 33.77 | trjA0A1B6P9M1 | Uncharacterized protein                                           | <i>Sorghum bicolor</i>         | 1 |
| 208 | 1.68 | 2.00 | 4.39  | trjF2D2W7     | Predicted protein                                                 | <i>Hordeum vulgare</i>         | 1 |
| 209 | 1.68 | 2.00 | 2.52  | trjM0XNU3     | Uncharacterized protein (HSP70)                                   | <i>Hordeum vulgare</i>         | 1 |
| 210 | 1.68 | 2.00 | 5.00  | trjA0A287VI11 | Uncharacterized protein                                           | <i>Hordeum vulgare</i>         | 1 |
| 211 | 1.66 | 2.00 | 3.49  | trjA0A2S3H2Q0 | Uncharacterized protein                                           | <i>9POAL</i>                   | 1 |
| 212 | 1.62 | 2.00 | 4.46  | trjF2EHX7     | Predicted protein                                                 | <i>Hordeum vulgare</i>         | 1 |
| 213 | 1.62 | 2.00 | 5.93  | trjF2DN06     | Predicted protein                                                 | <i>Hordeum vulgare</i>         | 1 |
| 214 | 1.46 | 1.96 | 3.81  | trjM0Z0Z6     | Uncharacterized protein (Auxin-induced protein)                   | <i>Hordeum vulgare</i>         | 1 |
| 215 | 1.43 | 1.92 | 3.21  | trjM0Y7A8     | Uncharacterized protein (Phosphoethanolamine methyltransferase)   | <i>Hordeum vulgare</i>         | 1 |
| 216 | 1.42 | 1.92 | 1.47  | trjA0A1Z5R7G5 | Uncharacterized protein                                           | <i>Sorghum bicolor</i>         | 1 |
| 217 | 1.41 | 1.85 | 2.39  | trjQ94IC1     | Betaine aldehyde dehydrogenase                                    | <i>Hordeum vulgare</i>         | 1 |
| 218 | 1.25 | 1.72 | 2.47  | trjF2E6I5     | Predicted protein (ATP phosphoribosyltransferase)                 | <i>Hordeum vulgare</i>         | 1 |
| 219 | 1.24 | 1.72 | 5.00  | trjF2CXK6     | Predicted protein (3-ketoacyl-CoA thiolase-like protein)          | <i>Hordeum vulgare</i>         | 1 |
| 220 | 1.22 | 1.70 | 1.69  | sp K1C10      | Keratin                                                           | <i>Homo sapiens</i>            | 1 |
| 221 | 1.17 | 1.66 | 4.63  | trjU5ID99     | Maturase K (Fragment)                                             | <i>9POAL</i>                   | 1 |
| 222 | 1.14 | 1.62 | 4.56  | trjK3XT21     | Uncharacterized protein                                           | <i>Setaria italica</i>         | 1 |
| 223 | 1.13 | 1.60 | 4.82  | trjF2DM63     | Predicted protein (Exonuclease 3'-5' domain-containing protein 1) | <i>Hordeum vulgare</i>         | 1 |
| 224 | 1.13 | 1.60 | 5.75  | trjA0A1D6D7T0 | Uncharacterized protein                                           | <i>Triticum aestivum</i>       | 1 |
| 226 | 0.99 | 1.44 | 2.41  | trjM0W5Z0     | Uncharacterized protein (T-complex protein 1 subunit theta)       | <i>Hordeum vulgare</i>         | 1 |
| 227 | 0.99 | 1.44 | 23.58 | trjA0A1D6MI07 | GDSL esterase/lipase                                              | <i>Zea mays</i>                | 1 |
| 228 | 0.98 | 1.44 | 5.40  | trjQ8H2M5     | Uncharacterized protein                                           | <i>Oryza sativa</i>            | 1 |
| 229 | 0.97 | 1.42 | 13.39 | trjM0Y8U3     | 40S ribosomal protein S12                                         | <i>Hordeum vulgare</i>         | 1 |
| 230 | 0.86 | 1.30 | 3.01  | trjF2D3M9     | Predicted protein                                                 | <i>Hordeum vulgare</i>         | 1 |
| 231 | 0.82 | 1.26 | 1.18  | trjK4A546     | Uncharacterized protein                                           | <i>Setaria italica</i>         | 1 |
| 232 | 0.78 | 1.21 | 3.39  | trjA0A1E5W6Y7 | Shugoshin-1                                                       | <i>9POAL</i>                   | 1 |
| 233 | 0.77 | 1.22 | 11.45 | trjA0A1E5UZM9 | Tubulin beta chain                                                | <i>9POAL</i>                   | 2 |
| 234 | 0.75 | 1.03 | 4.98  | trjA0A287VEF2 | Uncharacterized protein                                           | <i>Hordeum vulgare</i>         | 1 |
| 235 | 0.74 | 1.17 | 4.43  | trjA0A287P659 | Uncharacterized protein (27K protein)                             | <i>Hordeum vulgare</i>         | 1 |
| 236 | 0.64 | 1.60 | 3.91  | trjI1UFL8     | Maturase K (Fragment)                                             | <i>9POAL</i>                   | 1 |
| 237 | 0.61 | 1.01 | 1.54  | trjM8BQ64     | Putative RING finger protein                                      | <i>Aegilops tauschii</i>       | 1 |
| 239 | 0.52 | 0.90 | 16.88 | trjA0A0D3HV86 | Histone H2A                                                       | <i>Oryza sativa</i>            | 1 |
| 240 | 0.50 | 0.90 | 5.20  | trjM0YJN2     | Uncharacterized protein (MLP-like protein 34)                     | <i>Hordeum vulgare</i>         | 1 |
| 241 | 0.47 | 0.85 | 3.26  | trjW5EIH4     | Uncharacterized protein                                           | <i>Triticum aestivum</i>       | 1 |
| 242 | 0.47 | 0.85 | 9.09  | trjA0A0N7KQ06 | Os08g0476050 protein (Fragment)                                   | <i>Oryza sativa</i>            | 1 |
| 243 | 0.47 | 0.84 | 2.37  | sp Q2QNK7     | Solute carrier family 40 member 2, chloroplastic                  | <i>ORYSJ</i>                   | 1 |
| 244 | 0.45 | 0.82 | 1.60  | trjW5FHY4     | Uncharacterized protein                                           | <i>Triticum aestivum</i>       | 1 |
| 245 | 0.44 | 2.02 | 10.98 | trjM0YRV8     | Glyceraldehyde-3-phosphate dehydrogenase                          | <i>Hordeum vulgare</i>         | 3 |

**Table S2.** Proteins identified in developing endosperm of barley cv Sloop after chymotrypsin digestion.

| N  | Unused | Total | % Cov<br>(95) | Accession     | Name                                                      | Species                      | Peptides<br>(95%) | Alternate<br>Accession | Alternate<br>Accession |
|----|--------|-------|---------------|---------------|-----------------------------------------------------------|------------------------------|-------------------|------------------------|------------------------|
| 1  | 35.03  | 35.03 | 63.37         | tr A0A287EIM7 | Uncharacterized protein (C-hordein)                       | <i>Hordeum vulgare</i>       | 67                |                        |                        |
| 2  | 18.13  | 18.13 | 25.45         | tr I6TRS8     | D-hordein                                                 | <i>Hordeum vulgare</i>       | 27                |                        |                        |
| 3  | 16.86  | 16.91 | 41.63         | sp CTRA       | Chymotrypsin                                              | <i>Bos taurus</i>            | 27                |                        |                        |
| 4  | 13.15  | 13.15 | 34.47         | tr A0A287EFE1 | Uncharacterized protein (B1-hordein)                      | <i>Hordeum vulgare</i>       | 32                | sp P06470              |                        |
| 5  | 11.78  | 12.19 | 19.62         | tr Q7YMR9     | Ribulose biphosphate carboxylase large chain              | <i>Hordeum vulgare</i>       | 8                 |                        |                        |
| 6  | 10.49  | 13.16 | 34.96         | tr A0A287EEX5 | Uncharacterized protein (C-hordein)                       | <i>Hordeum vulgare</i>       | 24                |                        |                        |
| 7  | 9.37   | 9.53  | 22.82         | tr A0A287NA39 | Uncharacterized protein (Serpin Z7)                       | <i>Hordeum vulgare</i>       | 17                |                        |                        |
| 8  | 8.99   | 9.33  | 17.60         | tr F2CXT7     | Fructose-bisphosphate aldolase                            | <i>Hordeum vulgare</i>       | 6                 |                        |                        |
| 9  | 8.64   | 9.37  | 23.93         | tr I6TMV6     | Gamma-1-hordein                                           | <i>Hordeum vulgare</i>       | 12                |                        |                        |
| 10 | 8.45   | 8.94  | 19.30         | tr F2D284     | Protein disulfide-isomerase                               | <i>Hordeum vulgare</i>       | 13                |                        |                        |
| 11 | 8.39   | 8.47  | 10.37         | tr M0XUU4     | Uncharacterized protein (Globulin-1 S allele)             | <i>Hordeum vulgare</i>       | 8                 |                        |                        |
| 12 | 6.89   | 6.89  | 8.37          | tr Q6BCT3     | Methionine synthase                                       | <i>Hordeum vulgare</i>       | 5                 |                        |                        |
| 13 | 5.62   | 5.63  | 3.68          | tr S4UAT5     | Sucrose synthase                                          | <i>Saccharum officinarum</i> | 3                 |                        |                        |
| 14 | 5.61   | 5.62  | 10.09         | tr U5NIU3     | Beta-amylase                                              | <i>Hordeum vulgare</i>       | 4                 |                        |                        |
| 15 | 5.39   | 5.42  | 7.68          | sp P42210     | Phytopsin                                                 | <i>Hordeum vulgare</i>       | 3                 |                        |                        |
| 16 | 5.37   | 5.41  | 8.39          | tr F2CWX1     | Predicted protein (Elongation factor 2)                   | <i>Hordeum vulgare</i>       | 4                 |                        |                        |
| 17 | 5.36   | 5.39  | 7.86          | tr A0A287PR32 | 40S ribosomal protein SA                                  | <i>Hordeum vulgare</i>       | 3                 |                        |                        |
| 18 | 4.28   | 4.28  | 4.40          | tr Q03678     | Embryo globulin                                           | <i>Hordeum vulgare</i>       | 2                 |                        |                        |
| 19 | 4.23   | 4.23  | 15.12         | tr F2CWRO     | Formate dehydrogenase, mitochondrial                      | <i>Hordeum vulgare</i>       | 4                 |                        |                        |
| 20 | 4.22   | 4.23  | 9.62          | tr A0A287U7R7 | Glyceraldehyde-3-phosphate dehydrogenase                  | <i>Hordeum vulgare</i>       | 3                 |                        |                        |
| 21 | 4.13   | 4.17  | 14.77         | tr F2D629     | Ribulose biphosphate carboxylase small chain              | <i>Hordeum vulgare</i>       | 2                 |                        |                        |
| 22 | 4.08   | 4.09  | 10.81         | tr A0A287TT80 | Phosphoglycerate kinase                                   | <i>Hordeum vulgare</i>       | 2                 |                        |                        |
| 23 | 4.00   | 4.00  | 3.73          | tr Q40025     | Beta-glucosidase                                          | <i>Hordeum vulgare</i>       | 2                 |                        |                        |
| 24 | 4.00   | 4.00  | 2.77          | tr F2DLM4     | Predicted protein (Phospholipase A1-II 7)                 | <i>Hordeum vulgare</i>       | 2                 |                        |                        |
| 25 | 4.00   | 4.00  | 3.86          | tr Q9ZTB6     | Starch branching enzyme IIb                               | <i>Hordeum vulgare</i>       | 2                 |                        |                        |
| 26 | 3.96   | 4.06  | 20.69         | tr F2CRF1     | Predicted protein (14-3-3 protein)                        | <i>Hordeum vulgare</i>       | 4                 |                        |                        |
| 27 | 3.69   | 3.73  | 3.86          | tr M0X5Z1     | Uncharacterized protein (Eukaryotic initiation factor 4A) | <i>Hordeum vulgare</i>       | 3                 |                        |                        |
| 28 | 3.60   | 3.66  | 10.41         | tr A0A0U2L8B1 | Eukaryotic elongation factor 1 gamma                      | <i>Hordeum vulgare</i>       | 3                 |                        |                        |
| 29 | 3.37   | 3.56  | 5.32          | tr Q42847     | Lipoxygenase                                              | <i>Hordeum vulgare</i>       | 4                 |                        |                        |
| 30 | 3.33   | 3.38  | 4.72          | sp P11955     | 26 kDa endochitinase 1                                    | <i>Hordeum vulgare</i>       | 2                 |                        |                        |
| 31 | 3.27   | 3.35  | 7.11          | tr F2DCS7     | Ketol-acid reductoisomerase                               | <i>Hordeum vulgare</i>       | 4                 |                        |                        |
| 32 | 3.24   | 3.30  | 15.42         | tr F2DD97     | Predicted protein (NAP1-related protein 2)                | <i>Hordeum vulgare</i>       | 2                 |                        |                        |
| 33 | 3.15   | 3.22  | 7.03          | tr Q9MDQ1     | ATP synthase subunit alpha (Fragment)                     | <i>Sorghum bicolor</i>       | 2                 |                        |                        |
| 34 | 3.11   | 3.19  | 4.68          | tr F2DCE3     | Pyruvate, phosphate dikinase                              | <i>Hordeum vulgare</i>       | 3                 |                        |                        |
| 35 | 3.10   | 3.17  | 6.68          | tr F2D5B2     | ATP synthase subunit beta                                 | <i>Hordeum vulgare</i>       | 2                 |                        |                        |
| 36 | 3.06   | 3.22  | 5.93          | tr Q4L1B2     | Glucose-1-phosphate adenyltransferase                     | <i>Hordeum vulgare</i>       | 2                 |                        |                        |
| 37 | 3.05   | 3.21  | 14.12         | sp Q43470     | 14-3-3-like protein B                                     | <i>Hordeum vulgare</i>       | 3                 |                        |                        |
| 38 | 3.02   | 3.11  | 12.95         | tr F2EI64     | Predicted protein (Late embryogenesis abundant protein)   | <i>Hordeum vulgare</i>       | 2                 |                        |                        |
| 39 | 2.96   | 3.03  | 23.32         | sp P34937     | Triosephosphate isomerase, cytosolic                      | <i>Hordeum vulgare</i>       | 4                 |                        |                        |
| 40 | 2.90   | 3.06  | 5.31          | tr V9SHG9     | Starch synthase, chloroplastic/amyloplastic               | <i>Hordeum vulgare</i>       | 2                 |                        |                        |
| 41 | 2.88   | 3.05  | 6.23          | tr F2D714     | Glyceraldehyde-3-phosphate dehydrogenase                  | <i>Hordeum vulgare</i>       | 2                 |                        |                        |
| 42 | 2.77   | 2.93  | 18.47         | tr Q7XUY5     | OSJNBb0048E02.12 protein (Major latex protein)            | <i>Oryza sativa</i>          | 2                 |                        |                        |

|    |      |      |       |               |                                                                          |                                |    |                         |
|----|------|------|-------|---------------|--------------------------------------------------------------------------|--------------------------------|----|-------------------------|
| 43 | 2.74 | 4.98 | 24.15 | tr A0A287EFF7 | Uncharacterized protein (B-hordein)                                      | <i>Hordeum vulgare</i>         | 12 |                         |
| 44 | 2.73 | 2.80 | 12.88 | tr I6TEV2     | Gamma-3-hordein                                                          | <i>Hordeum vulgare</i>         | 3  | tr A0A287EEZ5 sp P80198 |
| 45 | 2.64 | 2.78 | 2.91  | tr Q6LAA4     | Elongation factor 1-alpha                                                | <i>Hordeum vulgare</i>         | 2  |                         |
| 46 | 2.58 | 3.60 | 16.67 | tr A0A287W082 | Uncharacterized protein (Protein disulfide-isomerase)                    | <i>Hordeum vulgare</i>         | 3  |                         |
| 47 | 2.48 | 2.48 | 5.10  | tr M0WQY8     | Uncharacterized protein (Heat shock cognate 70 kDa protein 1)            | <i>Hordeum vulgare</i>         | 3  |                         |
| 48 | 2.47 | 2.62 | 11.02 | sp P01545     | Alpha-hordothionin                                                       | <i>Hordeum vulgare</i>         | 2  |                         |
| 49 | 2.38 | 2.58 | 5.11  | tr Q4LB20     | Adenosylhomocysteinase                                                   | <i>Hordeum vulgare</i>         | 2  |                         |
| 50 | 2.23 | 2.25 | 2.96  | tr M0YIA7     | Isocitrate dehydrogenase [NADP]                                          | <i>Hordeum vulgare</i>         | 1  |                         |
| 51 | 2.16 | 2.18 | 3.90  | tr Q40069     | Peroxidase                                                               | <i>Hordeum vulgare</i>         | 1  |                         |
| 52 | 2.05 | 2.05 | 10.16 | tr Q945R5     | Ascorbate peroxidase                                                     | <i>Hordeum vulgare</i>         | 3  |                         |
| 53 | 2.03 | 2.03 | 4.68  | tr M0Z903     | Pyruvate kinase                                                          | <i>Hordeum vulgare</i>         | 1  |                         |
| 54 | 2.01 | 2.16 | 11.79 | tr F2D6B1     | Predicted protein (Dehydroascorbate reductase 2)                         | <i>Hordeum vulgare</i>         | 2  |                         |
| 55 | 2.01 | 2.01 | 18.52 | tr F2E931     | 40S ribosomal protein S21                                                | <i>Hordeum vulgare</i>         | 2  |                         |
| 56 | 2.01 | 2.01 | 6.87  | tr M0YMF1     | Tubulin alpha chain                                                      | <i>Hordeum vulgare</i>         | 2  |                         |
| 58 | 2.00 | 2.01 | 6.42  | tr F2EG53     | Predicted protein (Elongation factor 1-beta)                             | <i>Hordeum vulgare</i>         | 1  |                         |
| 59 | 2.00 | 2.00 | 23.89 | tr M0VMI2     | Predicted protein (Calmodulin)                                           | <i>Hordeum vulgare</i>         | 2  |                         |
| 60 | 2.00 | 2.00 | 0.85  | tr A0A1D6JEH2 | Putative leucine-rich repeat receptor-like protein kinase family protein | <i>Zea mays</i>                | 1  |                         |
| 61 | 2.00 | 2.00 | 2.43  | tr F2D9S0     | Predicted protein (Leucine-rich repeat/extensin 2)                       | <i>Hordeum vulgare</i>         | 1  |                         |
| 62 | 2.00 | 2.00 | 2.09  | tr F2EB61     | Pyrophosphate--fructose 6-phosphate 1-phosphotransferase subunit alpha   | <i>Hordeum vulgare</i>         | 1  |                         |
| 63 | 2.00 | 2.00 | 16.99 | tr Q945R6     | Ascorbate peroxidase (Fragment)                                          | <i>Hordeum vulgare</i>         | 2  |                         |
| 64 | 2.00 | 2.00 | 29.69 | tr A0A287P3F1 | Uncharacterized protein (NADH dehydrogenase (Ubiquinone) 1 alpha subcc   | <i>Hordeum vulgare</i>         | 1  |                         |
| 65 | 2.00 | 2.00 | 19.67 | sp P69693     | Photosystem II reaction center protein K                                 | <i>Hordeum vulgare</i>         | 1  |                         |
| 66 | 2.00 | 2.00 | 5.63  | tr Q9SAT0     | NADPH-dependent reductase (Fragment)                                     | <i>Zea mays</i>                | 1  |                         |
| 67 | 2.00 | 2.00 | 7.96  | tr K7R153     | Superoxide dismutase [Cu-Zn]                                             | <i>Hordeum vulgare</i>         | 1  |                         |
| 68 | 2.00 | 2.00 | 5.58  | tr Q8W0V1     | Cold acclimation WCOR413-like protein gamma form                         | <i>Hordeum vulgare</i>         | 1  |                         |
| 69 | 2.00 | 2.00 | 1.87  | tr F2DIQ9     | Predicted protein (Methylmalonate semialdehyde dehydrogenase)            | <i>Hordeum vulgare</i>         | 1  |                         |
| 70 | 2.00 | 2.00 | 2.27  | tr F2D807     | D-3-phosphoglycerate dehydrogenase                                       | <i>Hordeum vulgare</i>         | 1  |                         |
| 71 | 2.00 | 2.00 | 3.93  | tr F2DYM4     | Predicted protein (Branched-chain amino acid aminotransferase-like)      | <i>Hordeum vulgare</i>         | 1  |                         |
| 72 | 2.00 | 2.00 | 2.74  | tr F2DT07     | Predicted protein (Plastid phosphate/phosphoenolpyruvate translocator2)  | <i>Hordeum vulgare</i>         | 1  |                         |
| 73 | 2.00 | 2.00 | 7.90  | tr M8D9R7     | Uncharacterized protein                                                  | <i>Aegilops tauschii</i>       | 1  |                         |
| 74 | 2.00 | 2.00 | 7.14  | tr M8BBK0     | Uncharacterized protein (Bifunctional epoxide hydrolase 2)               | <i>Aegilops tauschii</i>       | 1  |                         |
| 75 | 2.00 | 2.00 | 3.20  | tr M8ABK3     | Uncharacterized protein                                                  | <i>Triticum urartu</i>         | 1  |                         |
| 76 | 2.00 | 2.00 | 10.00 | tr F2CR57     | Predicted protein (Fragment)                                             | <i>Hordeum vulgare</i>         | 1  |                         |
| 77 | 2.00 | 2.00 | 2.82  | tr M0UFT6     | Inosine-5'-monophosphate dehydrogenase                                   | <i>Hordeum vulgare</i>         | 1  |                         |
| 78 | 2.00 | 2.00 | 4.76  | tr J3LC80     | Uncharacterized protein                                                  | <i>Oryza brachyantha</i>       | 1  |                         |
| 79 | 2.00 | 2.00 | 6.72  | tr I1GQ99     | Uncharacterized protein (Dof zinc finger protein 7)                      | <i>Brachypodium distachyon</i> | 1  |                         |
| 80 | 2.00 | 2.00 | 12.11 | tr F2DYN8     | ATP-dependent Clp protease proteolytic subunit                           | <i>Hordeum vulgare</i>         | 1  |                         |
| 81 | 2.00 | 2.00 | 10.85 | tr F2DVW7     | Acyl carrier protein                                                     | <i>Hordeum vulgare</i>         | 1  |                         |
| 82 | 2.00 | 2.00 | 4.14  | tr A1C0L3     | UCW116, putative lipase                                                  | <i>Hordeum vulgare</i>         | 1  |                         |
| 83 | 2.00 | 2.00 | 9.66  | sp P28041     | Alpha-amylase/trypsin inhibitor CMa                                      | <i>Hordeum vulgare</i>         | 1  |                         |
| 84 | 1.92 | 2.00 | 9.40  | tr A1X810     | 14-3-3E                                                                  | <i>Hordeum vulgare</i>         | 1  |                         |
| 85 | 1.91 | 2.00 | 4.01  | tr F2D4W3     | Predicted protein (Enolase)                                              | <i>Hordeum vulgare</i>         | 1  |                         |
| 86 | 1.85 | 2.00 | 14.81 | tr F2E5D0     | Predicted protein (Protease)                                             | <i>Hordeum vulgare</i>         | 1  |                         |
| 87 | 1.72 | 1.85 | 4.91  | tr F2DB00     | Predicted protein (Prohibitin)                                           | <i>Hordeum vulgare</i>         | 1  |                         |
| 88 | 1.64 | 1.86 | 7.90  | tr F2CQP8     | Predicted protein (Lactoylglutathione lyase)                             | <i>Hordeum vulgare</i>         | 2  |                         |

|    |      |      |       |               |                                                    |                        |   |
|----|------|------|-------|---------------|----------------------------------------------------|------------------------|---|
| 89 | 1.62 | 1.74 | 3.37  | tr A5CFY9     | Tubulin beta chain                                 | <i>Hordeum vulgare</i> | 1 |
| 90 | 1.57 | 1.70 | 2.24  | tr Q42835     | Beta-D-glucan exohydrolase, isoenzyme ExoII        | <i>Hordeum vulgare</i> | 1 |
| 91 | 1.55 | 1.68 | 8.87  | sp P12940     | Bowman-Birk type trypsin inhibitor                 | <i>Hordeum vulgare</i> | 1 |
| 92 | 1.48 | 1.60 | 17.20 | tr A0A287VGJ2 | Uncharacterized protein (Acyl-CoA-binding protein) | <i>Hordeum vulgare</i> | 1 |
| 93 | 1.47 | 1.59 | 4.00  | tr Q6E5A5     | Plastidial ADP-glucose transporter                 | <i>Hordeum vulgare</i> | 1 |
| 94 | 1.43 | 1.55 | 5.58  | tr F2DDU3     | Predicted protein (20 kDa chaperonin)              | <i>Hordeum vulgare</i> | 1 |
| 95 | 1.43 | 1.55 | 10.69 | tr F2E5Q1     | Profilin                                           | <i>Hordeum vulgare</i> | 1 |
| 96 | 1.40 | 1.51 | 2.23  | tr F2E0T2     | Predicted protein (Leucine aminopeptidase 2)       | <i>Hordeum vulgare</i> | 1 |
| 97 | 1.38 | 1.49 | 2.56  | tr S4Z2B0     | Photosystem II CP47 reaction center protein        | <i>Hordeum vulgare</i> | 1 |
| 98 | 1.36 | 1.54 | 25.36 | tr F2DY31     | Predicted protein (Actin-depolymerizing factor 3)  | <i>Hordeum vulgare</i> | 3 |
| 99 | 1.32 | 1.48 | 6.48  | tr F2E9N0     | Predicted protein (12S seed storage globulin 1)    | <i>Hordeum vulgare</i> | 2 |



**Table S3.** Homology searching (using BLASTp analysis) of the barley gluten peptides monitored in this study.

| Peptide sequence                | Protein type | BLASTp results <sup>a</sup>                                                                                                                                                                                                   | Peptide No. | Species           |
|---------------------------------|--------------|-------------------------------------------------------------------------------------------------------------------------------------------------------------------------------------------------------------------------------|-------------|-------------------|
| <i>Trypsin-derived peptides</i> |              |                                                                                                                                                                                                                               |             |                   |
| QQCCQPLAQISEQAR                 | ALP          | <b>F2EGD5</b> ; A0A287F854; A0A287JK80                                                                                                                                                                                        | F2EGD5-T1   | <i>H. vulgare</i> |
| MVLQTLPSMCR                     | ALP          | <b>M0VEH1</b> ; A0A287JK04; M0VKM6                                                                                                                                                                                            | M0VEH1-T1   | <i>H. vulgare</i> |
| VFLQQQCSPVR                     | B-hordein    | A0A0K2GS22; A0A0K2GRU1; A0A0K2GSM3;<br>Q3YAF9; A0A0K1Z5E8; A0A0K2GRS6;<br>A0A287EFB3; A0A287EFH8; A0A287EFF7;<br>I6SJ13; Q40026; I6TMV2; I6QP72; I6SJ22;<br><b>I6TRT2</b> ; Q40021; I6R4A7; I6SW25; I6QM99;<br>I6TMW0; Q40020 | I6TRT2-T1   | <i>H. vulgare</i> |
| MPQLIAR                         | B-hordein    | Q2XQF0; I6SJ13; Q40026; I6TMV2; Q3LTR1;<br>I6QP72; I6SJ22; <b>I6TRT2</b> ; I6SW25; I6QM99;<br>I6TMW0                                                                                                                          | I6TRT2-T2   | <i>H. vulgare</i> |
| LQMLQLSSCHVLQQCCQQLPQISEQFR     | B-hordein    | I6SJ22; <b>I6TRT2</b> ; I6SW25; I6TMW0                                                                                                                                                                                        | I6TRT2-T3   | <i>H. vulgare</i> |
| MCNVNVPLYDIMPPDFWH              | B-hordein    | A0A287EFB3; Q44026; I6TMV2; I6QP72;<br>I6SJ22; <b>I6TRT2</b> ; I6SW25; C7FB15; I6QM99;<br>I6TMW0                                                                                                                              | I6TRT2-T4   | <i>H. vulgare</i> |
| VFLQQQCSPVAMSQR                 | B-hordein    | I6TEV5; <b>I6SJ26</b> ; Q0PIV6; I6SW30; I6TRT5;<br>I6TMW4; A0A287EF93; A0A287EFF5; C7FB14;<br>C7FB17; C7FB17; C7FB13; C7FB16; Q2XQF1;<br>C7FB15; A0A287EF96; A0A287EFB7;<br>A0A287EF74; A0A287EFC4                            | I6SJ26-T1   | <i>H. vulgare</i> |
| TLPMMSVNVPFYR                   | B-hordein    | <b>I6SJ26</b> ; Q3YAF9                                                                                                                                                                                                        | I6SJ26-T2   | <i>H. vulgare</i> |
| ILPFGIDTR                       | B-hordein    | <b>I6SJ26</b> ; A0A287EIW5; Q3YAF9; A0A287EIZ3;<br>C7FB14; C7FB16; A0A287EF74                                                                                                                                                 | I6SJ26-T3   | <i>H. vulgare</i> |
| SQMLQQSSCHVLQQCCQQLPQIPEQLR     | B-hordein    | P06471; <b>I6SW30</b> ; I6TRT5; I6TMW4;<br>A0A287EF93; A0A287EFF5; A0A287EF96;<br>A0A287EFB7                                                                                                                                  | I6SW30-T1   | <i>H. vulgare</i> |
| TLPTMCSVNVPLYR                  | B-hordein    | P06471; Q9SAT9; I6TEV5; A0A287EFG2;<br><b>I6SW30</b> ; I6TRT5; I6TMW4; A0A287EF93;<br>A0A287EFF5; C7FB17; C7FB13; Q2XQF1;<br>A0A287EF96; A0A287EFB7; A0A287EFB8;<br>A0A287EFB1                                                | I6SW30-T2   | <i>H. vulgare</i> |

|                             |                    |                                                                                                                                    |               |                    |
|-----------------------------|--------------------|------------------------------------------------------------------------------------------------------------------------------------|---------------|--------------------|
| IVPLAIDTR                   | B-hordein          | P06471; Q9SAT9; I6TEV5; <b>I6SW30</b> ; I6TRT5; I6TMW4; A0A287EF93; A0A287EFF5; C7FB13; Q2XQF1; A0A287EF96; A0A287EFB7; A0A287EFB1 | I6SW30-T3     | <i>H. vulgare</i>  |
| AIVYSIVLR                   | B-hordein          | <b>I6TRT5</b>                                                                                                                      | I6TRT5-T1     | <i>H. vulgare</i>  |
| VFLQQQCSPVMPQR              | B-hordein          | Q4GST9; A0A0K2GRS0; A0A287EFG2; A0A0K2GRQ1; Q4G3S6; <b>Q4G3S1</b> ; Q4G3S5; Q4G3S3; A0A287EFB4; Q4G3S7; Q4G3S8; Q1LZV2; Q4G3T0     | Q4G3S1-T1     | <i>H. vulgare</i>  |
| QLPQIPEQFR                  | B-hordein          | Q4G3S6; <b>Q4G3S1</b> ; Q4G3S7; Q4G3S8                                                                                             | Q4G3S1-T2     | <i>H. vulgare</i>  |
| SLLQQSSCHVLQQCCQQLPQIPEQFR  | B-hordein          | <b>TC138764</b>                                                                                                                    | TC138674-T1   | <i>H. vulgare</i>  |
| LQMLQQSSCHVLQQCCQQLPQISEQFR | B-hordein          | A0A287EFB3; I6SJ13; Q40026; <b>I6TMV2</b> ; I6QP72; I6QM99                                                                         | I6TMV2-T1     | <i>H. vulgare</i>  |
| VFLQQQCSPVAMPQR             | B-hordein          | <b>A0A287EIW5</b> ; A0A287EIZ3; A0A287EJ06                                                                                         | A0A287EIW5-T1 | <i>H. vulgare</i>  |
| VFLQQQCIPVAMSQR             | B-hordein          | <b>R9YTM4</b>                                                                                                                      | R9YTM4-T1     | <i>T. aestivum</i> |
| VFLQQQCNPVAMPQR             | B-hordein          | <b>B9VUV5</b>                                                                                                                      | B9VUV5-T1     | <i>T. macha</i>    |
| ELQESSLEACR                 | D-hordein          | Q84LE9; I6SW23; I6SW34; F2EA67; A0A287G115; <b>I6TRS8</b> ; Q40054; A0A287FYP1; A0A287FYQ0; A0A287G127; Q40045                     | I6TRS8-T1     | <i>H. vulgare</i>  |
| DVSPECRPVALSQVVR            | D-hordein          | Q84LE9; I6SW23; I6SW34; F2EA67; A0A287G115; <b>I6TRS8</b> ; Q40054; A0A287FYP1; A0A287FYQ0; A0A287G127; Q40045                     | I6TRS8-T2     | <i>H. vulgare</i>  |
| QYEQQTEVPSK                 | D-hordein          | Q84LE9; I6SW23; I6SW34; F2EA67; A0A287G115; <b>I6TRS8</b> ; Q40054; A0A287FYP1; A0A287FYQ0; A0A287G127; Q40045                     | I6TRS8-T3     | <i>H. vulgare</i>  |
| GGSFYPGGTAPPLQGGWWGTSVK     | D-hordein          | Q84LE9; I6SW23; I6SW34; F2EA67; A0A287G115; <b>I6TRS8</b> ; Q40054; A0A287FYP1; A0A287FYQ0; A0A287G127; Q40045                     | I6TRS8-T4     | <i>H. vulgare</i>  |
| AQLLAAQLPAMCR               | D-hordein          | Q84LE9; I6SW23; I6SW34; F2EA67; A0A287G115; <b>I6TRS8</b> ; Q40054; Q02056                                                         | I6TRS8-T5     | <i>H. vulgare</i>  |
| LEGGGGLLASQ                 | D-hordein          | Q84LE9; I6SW23; I6SW34; F2EA67; A0A287G115; <b>I6TRS8</b> ; Q40054; Q02056; A0A287G119; A0A287G118                                 | I6TRS8-T6     | <i>H. vulgare</i>  |
| ILQQSSCR                    | $\gamma$ 1-hordein | <b>I6TMV6</b> ; A0A287EEZ9                                                                                                         | I6TMV6-T1     | <i>H. vulgare</i>  |
| VMQQQCCLQLAQIPEQYK          | $\gamma$ 1-hordein | P17990; <b>I6TMV6</b> ; I6SJ17; H8Y0M8; A0A287EEZ9                                                                                 | I6TMV6-T2     | <i>H. vulgare</i>  |

|                                         |                    |                                                                                                                                                                                                                 |               |                   |
|-----------------------------------------|--------------------|-----------------------------------------------------------------------------------------------------------------------------------------------------------------------------------------------------------------|---------------|-------------------|
| CTAIDSIVHAIFMQQGQR                      | $\gamma$ 1-hordein | P17990; <b>I6TMV6</b> ; I6SJ17; H8Y0M8; Q70IB4; A0A287EEZ9                                                                                                                                                      | I6TMV6-T3     | <i>H. vulgare</i> |
| QGVQIVQQQPQPQQVGGQCVLVQGGVAQPQQLAQMEAIR | $\gamma$ 1-hordein | <b>I6TMV6</b>                                                                                                                                                                                                   | I6TMV6-T4     | <i>H. vulgare</i> |
| APFVGVVTVGGGQ                           | $\gamma$ 1-hordein | P17990; <b>I6TMV6</b> ; I6SJ17; Q70IB4                                                                                                                                                                          | I6TMV6-T5     | <i>H. vulgare</i> |
| CTTIDSIVHAIFMQQGQR                      | $\gamma$ 1-hordein | <b>M0XYT2</b>                                                                                                                                                                                                   | M0XYT2-T1     | <i>H. vulgare</i> |
| QGVQIVQQQPQPQEVGGQCVLVQGR               | $\gamma$ 1-hordein | <b>M0XYT2</b>                                                                                                                                                                                                   | M0XYT2-T2     | <i>H. vulgare</i> |
| DIVQPQLAQMEAIR                          | $\gamma$ 1-hordein | <b>M0XYT2</b>                                                                                                                                                                                                   | M0XYT2-T3     | <i>H. vulgare</i> |
| APFFSLVNAGML                            | $\gamma$ 1-hordein | <b>M0XYT2</b>                                                                                                                                                                                                   | M0XYT2-T4     | <i>H. vulgare</i> |
| DVVQPQLAQMEAIR                          | $\gamma$ 1-hordein | <b>TC131355</b>                                                                                                                                                                                                 | TC131355-T1   | <i>H. vulgare</i> |
| APFVGVVSGVGGQ                           | $\gamma$ 1-hordein | <b>A0A287EEZ9</b>                                                                                                                                                                                               | A0A287EEZ9-T1 | <i>H. vulgare</i> |
| EFLQOCTLDEK                             | $\gamma$ 3-hordein | P80198; A0A287EEZ5; <b>I6TEV2</b>                                                                                                                                                                               | I6TEV2-T1     | <i>H. vulgare</i> |
| QQCCQQLANINEQSR                         | $\gamma$ 3-hordein | P80198; A0A287EEZ5; <b>I6TEV2</b>                                                                                                                                                                               | I6TEV2-T2     | <i>H. vulgare</i> |
| <i>Chymotrypsin-derived peptides</i>    |                    |                                                                                                                                                                                                                 |               |                   |
| VQGVSQPQQSQL                            | B-hordein          | <b>I6SJ26</b> ; A0A287EIW5; A0A287EIZ3; C7FB16; A0A287EJ06                                                                                                                                                      | I6SJ26-C1     | <i>H. vulgare</i> |
| GIDTRVGV                                | B-hordein          | <b>I6SJ26</b> ; A0A287EIW4; Q3YAF9; A0A287EIZ3; C7FB14; C7FB16; A0A287EF74                                                                                                                                      | I6SJ26-C2     | <i>H. vulgare</i> |
| AIDTRVGV                                | B-hordein          | P06471; Q9SAT9; I6TEV5; <b>I6SW30</b> ; I6TRT5; I6TMW4; A0A287EF93; A0A287EFF5; C7FB17; C7FB13; Q2XQF1; A0A287EF96; A0A287EFB7; A0A287EFB1                                                                      | I6SW30-C1     | <i>H. vulgare</i> |
| QQEKVGCSEF                              | B-hordein          | <b>I6SJ22</b> ; <b>I6TRT2</b> ; I6SW25; I6TMW0                                                                                                                                                                  | I6TRT2-C1     | <i>H. vulgare</i> |
| GQPQQVPQSVF                             | B-hordein          | A0A0K2GS22; A0A0K2GRU1; A0A0K2GSM3; A0A0K1Z5E8; A0A0K2GRS6; A0A287EFB3; A0A287EFD4; A0A287EFF7; I6SJ13; I6SJ22; <b>I6TRT2</b> ; Q40021; I6R4A7; I6SW25; I6TMW0; Q40020                                          | I6TRT2-C2     | <i>H. vulgare</i> |
| QQKPFPPQPPF                             | B-hordein          | <b>P06470</b> ; A0A287EFG2; A0A287EFE1; Q3LTR1; Q40022; A0A287EFB4                                                                                                                                              | P06470-C1     | <i>H. vulgare</i> |
| RHEAIRAIVY                              | B-hordein          | <b>P06470</b> ; A0A0K2GS22; A0A0K2GRU1; A0A0K2GSM3; A0A0K2GRS0; Q3YAF9; A0A287EFG2; A0A0K1Z5E8; A0A0K2GRS6; Q2XQF0; A0A287EFB3; A0A287EFD4; A0A287EFH8; A0A287EFF7; I6SJ13; A0A287EFE1; Q40026; I6TMV2; Q3LTR1; | P06470-C2     | <i>H. vulgare</i> |

|                                 |                    |                                                                                                                        |             |                   |
|---------------------------------|--------------------|------------------------------------------------------------------------------------------------------------------------|-------------|-------------------|
|                                 |                    | I6QP72; I6SJ22; I6TRT2; Q40021; I6R4A7; I6SW25                                                                         |             |                   |
| RGVGPSVGV                       | B-hordein          | <b>P06470</b> ; A0A287EFG2; A0A287EFH8; A0A287EFE1; Q0PIV6; Q40022                                                     | P06470-C3   | <i>H. vulgare</i> |
| LPQKFPVQQPF                     | C-hordein          | <b>Q40053</b> ; A0A287EIM7                                                                                             | Q40053-C1   | <i>H. vulgare</i> |
| QPQQPFPQGSEQIIPQQPFPL           | C-hordein          | P06472; A0A287EIM7; I6TEV8; <b>Q40053</b>                                                                              | Q40053-C2   | <i>H. vulgare</i> |
| QPQPFQPPQQPLPQPQQPF             | C-hordein          | P06472; A0A287EIM7; I6TEV8; <b>Q40053</b>                                                                              | Q40053-C3   | <i>H. vulgare</i> |
| IIPQQPQQPLPL                    | C-hordein          | P06472; I6TEV8; <b>Q40053</b>                                                                                          | Q40053-C4   | <i>H. vulgare</i> |
| LPQQPFPVQQPF                    | C-hordein          | <b>Q41210</b>                                                                                                          | Q41210-C1   | <i>H. vulgare</i> |
| QPQQPFPQQPQQPLPRPQQPFPW         | C-hordein          | A0A287EIM7; <b>Q41210</b> ; Q40053                                                                                     | Q41210-C2   | <i>H. vulgare</i> |
| QPQQPFPQPQQPIAHQPQQPF           | C-hordein          | A0A287EIM7; <b>Q41210</b> ; I6TEV8                                                                                     | Q41210-C3   | <i>H. vulgare</i> |
| SQQPQQPFPL                      | C-hordein          | A0A287EIM7; Q40055; <b>Q41210</b> ; I6TEV8                                                                             | Q41210-C4   | <i>H. vulgare</i> |
| QPQQPFPQQPQQPFPQQPQQIIF         | C-hordein          | <b>Q41210</b> ; Q40053                                                                                                 | Q41210-C5   | <i>H. vulgare</i> |
| IIPQQPQQPFPL                    | C-hordein          | <b>P17991</b>                                                                                                          | P17991-C1   | <i>H. vulgare</i> |
| EQQTEVPSKGGSF                   | D-hordein          | Q84LE9; I6SW23; I6SW34; F2EA67; A0A287G115; <b>I6TRS8</b> ; Q40054; A0A287FYP1; A0A287FYQ0; A0A287G127; Q40045         | I6TRS8-C1   | <i>H. vulgare</i> |
| QSATSPQQPGQGQGQQETYPIATSPHQPGQW | D-hordein          | I6SW23; I6SW34; F2EA67; <b>I6TRS8</b> ; Q40054; Q40045                                                                 | I6TRS8-C2   | <i>H. vulgare</i> |
| YPIATSPQQPGQGQQL                | D-hordein          | Q84LE9; I6SW23; I6SW34; F2EA67; A0A287G115; <b>I6TRS8</b> ; Q40054; A0A287FYP1; A0A287FYQ0; A0A287G127; Q40045; Q02056 | I6TRS8-C3   | <i>H. vulgare</i> |
| GQGQQPGHGQQL                    | D-hordein          | Q84LE9; I6SW23; I6SW34; F2EA67; A0A287G115; <b>I6TRS8</b> ; Q40054; A0A287FYP1; A0A287FYQ0; A0A287G127; Q40045; Q02056 | I6TRS8-C4   | <i>H. vulgare</i> |
| TQKPGQGY                        | D-hordein          | Q84LE9; I6SW23; I6SW34; F2EA67; A0A287G115; <b>I6TRS8</b> ; Q40054; A0A287FYP1; A0A287FYQ0; A0A287G127; Q02056         | I6TRS8-C5   | <i>H. vulgare</i> |
| HVSVEQPSASL                     | D-hordein          | Q84LE9; I6SW23; I6SW34; F2EA67; A0A287G115; <b>I6TRS8</b> ; Q40054; Q02056; A0A287G119; A0A287G118                     | I6TRS8-C6   | <i>H. vulgare</i> |
| VGVVTGVGGQ                      | $\gamma$ 1-hordein | P17990; <b>I6TMV6</b> ; I6SJ17                                                                                         | I6TMV6-C1   | <i>H. vulgare</i> |
| VQGRDVVQPQQL                    | $\gamma$ 1-hordein | <b>TC131355</b>                                                                                                        | TC131355-C1 | <i>H. vulgare</i> |
| QPQQQPFPQQKPF                   | $\gamma$ 1-hordein | P80198; A0A287EEZ5; <b>I6TEV2</b>                                                                                      | I6TEV2-C1   | <i>H. vulgare</i> |
| AQQQPSIEEQHQL                   | $\gamma$ 1-hordein | P80198; A0A287EEZ5; <b>I6TEV2</b>                                                                                      | I6TEV2-C2   | <i>H. vulgare</i> |

|           |                    |                                   |           |                   |
|-----------|--------------------|-----------------------------------|-----------|-------------------|
| VLPQQQAQF | $\gamma$ 1-hordein | P80198; A0A287EEZ5; <b>I6TEV2</b> | I6TEV2-C3 | <i>H. vulgare</i> |
|-----------|--------------------|-----------------------------------|-----------|-------------------|

a. Uniprot accession used in paper is shown in bold typefont.

**Table S4.** Barley gluten peptides monitored in this study. Three MRM transitions were used for each peptide with relative quantitation based on the summed peak area. The protein sequence in the row below each prototypic peptide shows the full protein sequence of the accession; N-terminal sequence (as predicted by SignalP server) identified as missing from mature proteins is italicised. The position of the prototypic peptides are shown in bold.

| Peptide Sequence                                                                                                                                                                                                                                                                                                            | Peptide marker | RT (min) | Q1 m/z (z)   | Q3 m/z (fragment, z)                                       | CE (V) |
|-----------------------------------------------------------------------------------------------------------------------------------------------------------------------------------------------------------------------------------------------------------------------------------------------------------------------------|----------------|----------|--------------|------------------------------------------------------------|--------|
| QQCCQLAQISEQAR                                                                                                                                                                                                                                                                                                              | F2EGD5-T1      | 4.32     | 908.90 (2+)  | 1112.61 (y10, 1+)<br>1240.67 (y11, 1+)<br>1015.55 (y9, 1+) | 45.5   |
| <i>MKTMLILALIAFAATSAVAQLDTTCSQGYGQCQQQPQQQMNTCAAFLQQCSRTPYVQSQMWQASGCQLMR<b>QQCCQLAQISEQAR</b>CQAVCSMAQVIMRQQQGQSFTQPQQQSSQSF</i><br><i>GQPQQQVPVEVMRMVLQTLPSMCSVNIPQYCTTTTPCSTITPTIYSIPMAATCAGGVC</i>                                                                                                                      |                |          |              |                                                            |        |
| MVLQTLPSMCR                                                                                                                                                                                                                                                                                                                 | M0VEH1-T1      | 5.54     | 668.32 (2+)  | 763.34 (y6, 1+)<br>864.39 (y7, 1+)<br>992.44 (y8, 1+)      | 33.4   |
| <i>MKTMFIVALIALAVISSVAQLDTTTCIQGYGQCQQQPQHMTCAAFLQQCSPTPYVQSQMWQASGCQLMRQQCCQLAQISEQNRCQAVCSVAQVIMQKQQQQQGQSFVQPQQQVPV</i><br><i>EITRMVLQTLPSMCRVNIPQHCVDTPCSTITQSPYNIPMAATCVGGTC</i>                                                                                                                                       |                |          |              |                                                            |        |
| VFLQQQCSPVR                                                                                                                                                                                                                                                                                                                 | I6TRT2-T1      | 4.17     | 681.34 (2+)  | 746.34 (y6, 1+)<br>874.40 (y7, 1+)<br>1002.46 (y8, 1+)     | 34.1   |
| MPQLIAR                                                                                                                                                                                                                                                                                                                     | I6TRT2-T2      | 4.32     | 414.74 (2+)  | 472.32 (y4, 1+)<br>600.38 (y5, 1+)<br>697.44 (y6, 1+)      | 20.7   |
| LQMLQLSSCHVLQQQCCQLPQISEQFR                                                                                                                                                                                                                                                                                                 | I6TRT2-T3      | 6.70     | 872.67 (4+)  | 1004.52 (y8, 1+)<br>1117.60 (y9, 1+)<br>1242.58 (b20, 2+)  | 31.4   |
| MCNVNVPLYDIMPPDFWH                                                                                                                                                                                                                                                                                                          | I6TRT2-T4      | 8.95     | 1124.51 (2+) | 1157.51 (y9,1+)<br>1320.57 (y10, 1+)<br>1530.71 (y12, 1+)  |        |
| <i>MKTFLIFALLVIAATSTIAQQQPYPQQPFQPPQPPFPQQTIPQQPQPYPQQPQPYPQQPFPPQQEFPQQPPFWPQQPFPQQPPFGLQQRILSQQQPCTPQQTPLPQGQLYQTLLQLQ</i><br><i>IPYVHPSILQQLNPCK<b>VFLQQQCSPVRMPQLIARLQMLQLSSCHVLQQQCCQLPQISEQFR</b>RHEAIRAIVYSIFLQEQPQQSVQGVSTQQQQLQEQKVGQCSFQQPQPQLGQPQQ</i><br><i>VPQSVFLQPHQIAQLEATTSTIALRTLPRMCNVNVPLYDIMPPDFWH</i> |                |          |              |                                                            |        |
| VFLQQQCSPVAMSQR                                                                                                                                                                                                                                                                                                             | I6SJ26-T1      | 4.81     | 889.93 (2+)  | 1035.45 (y9, 1+)<br>1163.51 (y10, 1+)<br>1291.57 (y11, 1+) | 44.5   |
| TLPMMCSVNVPFYR                                                                                                                                                                                                                                                                                                              | I6SJ26-T2      | 7.14     | 857.91 (2+)  | 981.52 (y8, 1+)<br>1141.55 (y9, 1+)<br>1272.59 (y10, 1+)   | 42.9   |
| ILPFGIDTR                                                                                                                                                                                                                                                                                                                   | I6SJ26-T3      | 6.20     | 516.30 (2+)  | 561.30 (y5, 1+)<br>708.37 (y6, 1+)                         | 25.8   |

|                                                                                                                                                                                                                                                                                                                               |             |      |             |                                                           |      |
|-------------------------------------------------------------------------------------------------------------------------------------------------------------------------------------------------------------------------------------------------------------------------------------------------------------------------------|-------------|------|-------------|-----------------------------------------------------------|------|
|                                                                                                                                                                                                                                                                                                                               |             |      |             | 805.42 (y7, 1+)                                           |      |
| MKTFLIFALLAIVATSTIAQQQPYPQQPQPFPPQQPIPQQPQPFPPQQPYPQQPQPFPPQQPIPQQPQYPQQPQPFPPQQPIPQQPQYPQQPQPFPPQQPVLQPFPSQQPFPQQPFFWQQQPVLSQQQPCTPQQTPLPQGGQDQMLVQVQIPFVHPSILQQLNPKVFLQQQCSPVAMSQR IARSQMLQQSSCYVLQQQCCQQLPQIPEQFRHEAVRAIVYSIVLQEQPQQLVQGVSPQQQSSQLHQVGCFSFQQPQPQQGQQQQVPPQSVFLQPLQLAQLEATASIALRTLTPMCSVNVPPFYRILPFGIDTRVGV |             |      |             |                                                           |      |
| SQMLQQSSCHVLQQCCQQLPQIPEQLR                                                                                                                                                                                                                                                                                                   | I6SW30-T1   | 5.67 | 863.91 (4+) | 980.55 (y8, 1+)<br>1093.64 (y9, 1+)<br>1221.70 (y10, 1+)  | 31.1 |
| TLPTMCSVNVPLYR                                                                                                                                                                                                                                                                                                                | I6SW30-T2   | 6.25 | 825.91 (2+) | 947.53 (y8, 1+)<br>1107.54 (y9, 1+)<br>1238.58 (y10, 1+)  | 41.3 |
| IVPLAIDTR                                                                                                                                                                                                                                                                                                                     | I6SW30-T3   | 5.26 | 499.31 (2+) | 575.32 (y5, 1+)<br>688.40 (y6, 1+)<br>785.45 (y7, 1+)     | 25.0 |
| MKTFLIFALLAIVATSTIAQQQPYPQQPQPFPPQQPIPQQPQPFPPQQPYPQQPQPFPPQQPIPQQPQYPQQPQPFPPQQPFFWQQQPVLSQQQPCTQEQTPLLQEQDQMLLQVQIPFVHPSILQQLNPKVFLQQQCSPVAMSQR IARSQMLQQSSCHVLQQCCQQLPQIPEQLRHEAVRAIVYSIVLQEQSLQLVQGVSPQQQSSQQQVGCFSFQQPQPQQGQQQVQVLLQPHQIAQLEATT SIALRTLPTMCSVNVPLYRIVPLAIDTRVGV                                          |             |      |             |                                                           |      |
| AIVYSIVLR                                                                                                                                                                                                                                                                                                                     | I6TRT5-T1   | 6.13 | 517.32 (2+) | 587.39 (y5, 1+)<br>750.45 (y6, 1+)<br>849.52 (y7, 1+)     | 25.9 |
| MKTFLIFALLAIVATSTIAQQQPYPQQPQPFPPQQPYPQQPQPFPPQQPIPQQPQYPQQPQPFPLQPFPSQQPFPQQPFFWQQQPVLSQQQPCTQEQTPLLQEQDQMLLQVQIPFVHPSILQQLNPKVFLQQQCSPVAMSQR IARSQMLQQSSCHVLQQCCQQLPQIPEQLRHEAVRAIVYSIVLREQSLQLVQGVSPQQQSSQQQVGCFSFQQPQPQQGQQQVQVLLQPHQIAQLEATT SIALRTLPTMCSVNVPLYRIVPLAIDTRVGV                                             |             |      |             |                                                           |      |
| VFLQQQCSPVMPQR                                                                                                                                                                                                                                                                                                                | Q4G3S1-T1   | 5.36 | 907.95 (2+) | 628.32 (y5, 1+)<br>1071.49 (y9, 1+)<br>1199.55 (y10, 1+)  | 45.4 |
| QLPQIPEQFR                                                                                                                                                                                                                                                                                                                    | Q4G3S1-T2   | 5.51 | 628.34 (2+) | 676.34 (y5, 1+)<br>789.43 (y6, 1+)<br>1014.54 (y8, 1+)    | 31.4 |
| MKTFLIFALLAIAATNTIAQQQFPFPQQPQYPQQPQYPQQPQPFPPQQPFPQQPFFWQQQPVQSQQQPCQQQQTPLPQGGQYQPLLQQQIPFVHPSVLQQLNPKVFLQQQCSPVAMPQR IARSQMLQQSSCHVLQQCCQQLPQIPEQFRHEAIRAI IYSIILQEQQQVQDFVQPPQQQPPQSSVQGVSSQSSQQPQLGQCSFQQPQLQQLGQQPQQQQVPLWAFLLQPPQMAQLEVMTSVALRTLPTMCMNVNPLYGITTSVPLSVGTGVPY                                            |             |      |             |                                                           |      |
| SQLLQQSSCHVLQQCCQQLPQIPEQFR                                                                                                                                                                                                                                                                                                   | TC138764-T1 | 5.95 | 867.92 (4+) | 917.48 (y7, 1+)<br>1014.54 (y8, 1+)<br>1127.62 (y9, 1+)   | 31.3 |
| MPQRIARSQLLQQSSCHVLQQCCQQLPQIPEQFRHEAIRAIVYSIFLQEQQLQSVQGVSPQQQLGQQQVGCFSFQQPQPQQVGGQQQVPPQSAFLQPHQIAQLEATT SIALRTLPTMCSVNVPLYRILRGVGPVGV                                                                                                                                                                                     |             |      |             |                                                           |      |
| LQMLQQSSCHVLQQCCQQLPQISEQFR                                                                                                                                                                                                                                                                                                   | I6TMV2-T1   | 5.92 | 876.42 (4+) | 1004.52 (y8, 1+)<br>1117.60 (y9, 1+)<br>1250.07 (b20, 2+) | 31.6 |

|                                                                                                                                                                                                                                                                                                                                                                               |               |      |                |                                                             |      |
|-------------------------------------------------------------------------------------------------------------------------------------------------------------------------------------------------------------------------------------------------------------------------------------------------------------------------------------------------------------------------------|---------------|------|----------------|-------------------------------------------------------------|------|
| MKTFLIFALLVIAATSTIAQQQPFPPQPPFPQQPQPYPQQPQPYPQQPFPQPPFPQQTIPQQPQPYPQQPFPQQAFPQQPPFWQQPFPQQPPFGLQQPILSQQQPCTPQQTPLP<br>QGQLYQTLQLQIPYVHPSILQQLNPKVFLQQQCSPVRMPQLIARLQMLQQSSCHVLQQQCCQQLPQISEQFRHEAIRAIVYSIFLQEQPQQSVQGVSTQQQLQQEQVQCSFQ<br>QPQPQQLGQAQQVPQSVFLQPHQIAQLEATT'SIALRTLPRMCNVNPLYDIMPDPFWH                                                                          |               |      |                |                                                             |      |
| VFLQQQCSPVAMPQR                                                                                                                                                                                                                                                                                                                                                               | A0A287EIW5-T1 | 5.11 | 894.95 (2+)    | 1045.47 (y9, 1+)<br>1173.53 (y10, 1+)<br>1301.59 (y11, 1+)  | 44.8 |
| MKTFLIFALLAIVATSTIAQQQPYPQQPQPFPQQPQPYPQQPQPFPFLQQPRPQQPQPYPQQPQPFPFSQQPIPKQPQPYPQQPQPFPQRPFPSQQPFPQQPPFWQQQPILSKQQ<br>PCTPQQPPLPQGQQDQMLVQVQIPFVHPSILQQLNPKVFLQQQCSPVAMPQR IARSQMLQQSSCHVLQQQCCQQLPQIPEQFRHEAVRAIVYSIILQEQPQQLVQGVSTPQQQSQ<br>LQQVGQCSFQQPQPQQGKQQQVPQSVFLQPHQIAQLEATASIALRTLPMMSVNLPLYRILPFGIDTRVGV                                                         |               |      |                |                                                             |      |
| VFLQQQCIPVAMSQR                                                                                                                                                                                                                                                                                                                                                               | R9YTM4-T1     | 4.41 | 902.95 (2+)    | 1189.56 (y10, 1+)<br>1317.62 (y11, 1+)<br>1445.68 (y12, 1+) | 45.2 |
| MKTFLIFALLAIAAASAI AQMETSRVPGLEKWPQQQPLPPQQPPCSQQQQPFPQQQP I I I LQQSPFSQQQQPVL PQQQPVI I LQQPPFSQQQQQQQQQQPFTQQQPPFSQQPP<br>ISQQQQQQQQQQPFTQQQPPFSQQPPISQQQQPPFSQQQQTPFSQQQQIPVIHPSVLQQLNPKVFLQQQCIPVAMSQR LARPMWQQSSCHVMQQCCQQLPQIPEQSRSEAIR<br>AIVYSIILQEQQGFVQPPQQQPQQSGQGVSTQHQQSSQQQQQLGQCSFQQPQQLQQLGQQPQQQIPQGI FLQPHQISQLEVMTSIALCTLPTMCGVNVPLYSSTTIMPFSIGTGV<br>GAY |               |      |                |                                                             |      |
| VFLQQCNPVAMPQR                                                                                                                                                                                                                                                                                                                                                                | B9VUV5-T1     | 5.36 | 908.44 (2+)    | 912.47 (y8, 1+)<br>1072.48 (y9, 1+)<br>1200.54 (y10, 1+)    | 45.4 |
| MKTFLV FALLAVAATSAIAQMETRCIPGLERPQQQPLPPQQTFPQQPLFSQQQQQLFPQQPSFSQQQPPFWQQQPPFSQQQPILPQQPPFSQQQQPVL PQQSPFSQQQLVLPQQ<br>QYQQLLQKVP IVQPSILQQLNPKVFLQQQCNPVAMPQR LARSQMWWQQSSCHVMQQCCQQLPQIPEQFRYEAIRAIYSIILQEQQVQGSIQSQQQPQQLGQCVSQQPQQSQ<br>QQLGQQPQQQQLAQGTFLQPHQIAQLEVMTSIALRILPTMCSVNVPLYRTTTT'SVPFVGTGVGAY                                                               |               |      |                |                                                             |      |
| ELQESSLEACR                                                                                                                                                                                                                                                                                                                                                                   | I6TRS8-T1     | 3.15 | 661.30 (2+)    | 735.33 (y6, 1+)<br>822.36 (y7, 1+)<br>951.40 (y8, 1+)       | 33.1 |
| DVSPECRPVALSQVVR                                                                                                                                                                                                                                                                                                                                                              | I6TRS8-T2     | 4.86 | 604.65 (3+)    | 642.85 (y11, 2+)<br>799.42 (y14, 2+)<br>755.90 (y13, 2+)    | 21.8 |
| QYEQQTEVPSK                                                                                                                                                                                                                                                                                                                                                                   | I6TRS8-T3     | 2.32 | 668.82 (2+)    | 788.42 (y7, 1+)<br>916.47 (y8, 1+)<br>1045.52 (y9, 1+)      | 33.4 |
| GGSFYPGGTAPPLQGGWWGTSVK                                                                                                                                                                                                                                                                                                                                                       | I6TRS8-T4     | 6.90 | 812.40<br>(3+) | 920.46 (y8, 3+)<br>977.49 (y8, 3+)<br>1105.54 (y10, 3+)     | 29.3 |
| AQLLAAQLPAMCR                                                                                                                                                                                                                                                                                                                                                                 | I6TRS8-T5     | 4.90 | 729.36 (2+)    | 747.34 (y6, 1+)<br>946.44 (y8, 1+)<br>1017.48 (y9, 1+)      | 36.5 |
| LEGGGGLLASQ                                                                                                                                                                                                                                                                                                                                                                   | I6TRS8-T6     | 4.50 | 501.27 (2+)    | 584.30 (b7, 1+)<br>697.39 (b8, 1+)<br>768.43 (b9, 1+)       | 25.1 |



|                                                                                                                                                                                                                                                                                                                                                                                                                                                                                                                                                                                                                                                                                                                                                                                                      |           |      |                 |                                                            |      |
|------------------------------------------------------------------------------------------------------------------------------------------------------------------------------------------------------------------------------------------------------------------------------------------------------------------------------------------------------------------------------------------------------------------------------------------------------------------------------------------------------------------------------------------------------------------------------------------------------------------------------------------------------------------------------------------------------------------------------------------------------------------------------------------------------|-----------|------|-----------------|------------------------------------------------------------|------|
| <b>MAKRLVLFVAVIVALVALTTAEREINGNNIFLDSRSRQLQCERELQESSLEACRRVVDQQLVGLPWPSTGLQMCCQQLRDVSPPCRVALSQVVRQYEQQTEVPSKGGSFYPPGGT<br/> APPLQQGGWGTSVKWYYPDQTSSQQSWQGGQQGYHQSVTSSQQPGQGQQGSYPGSTFPQQPGQGQQPGQRQPWSYPSATFPQQPGQGQQGYYPGATSLLLQPGQGQQGPYQSATS<br/> PQQPGQGQQQETYP IATSPHQPGWQQPGQGQQGYPSVTSPQQSGQGQQGYPSTTSPQQSGQGQQLGQGQQPGQGQQGYP SATFPQQPGQWQQGSYPSSTTSPQQSGQGQQGYNP<br/> SGTSTQQPGQVQQLGQGQQGYPIATSPQQPGQGQQLGQGQQPGHGQQLVQGGQQGGQQGHYPSMTSPHQGTGQGQKGYPSAISPPQQSGQGQQGYQPSGASSQGSVQGACQHSTS<br/> SPQQQAQGCQASSPKQGLGSLYPSGAYTQQKPGQGYNPPGGTSPLHQGGGGFGGGLTTEQPQGGKQPFHCQQTTVSPHQGQQTTVSPHQGQQTTVSPHQGQQTTVSPHQGQQTTVS<br/> PHPGQQTTVSPHQGQQTTVSPHPGQQTTVSPHQGQQTTVSPHQGQQTTVSPHQGQQTTVSPHQGQQTTVSPHQGQQTTVSPHQGQQTTVSPHQGQQTTVSPHQGQQTTVSPHQGQQTTVS<br/> ASLKVAKAQQQLAAQLPAMCRLEGGGGLLASQ</b> |           |      |                 |                                                            |      |
| ILQQSSCR                                                                                                                                                                                                                                                                                                                                                                                                                                                                                                                                                                                                                                                                                                                                                                                             | I6TMV6-T1 | 1.46 | 496.24 (2+)     | 509.19 (y4, 1+)<br>637.25 (y5, 1+)<br>765.31 (y6, 1+)      | 24.8 |
| VMQQQCCLQLAQIPEQYK                                                                                                                                                                                                                                                                                                                                                                                                                                                                                                                                                                                                                                                                                                                                                                                   | I6TMV6-T2 | 5.97 | 755.69 (3+)     | 777.42 (y6, 1+)<br>976.51 (y8, 1+)<br>1089.59 (y9, 1+)     | 27.2 |
| CTAIDSIVHAIFMQGQR                                                                                                                                                                                                                                                                                                                                                                                                                                                                                                                                                                                                                                                                                                                                                                                    | I6TMV6-T3 | 7.82 | 692.34 (3+)     | 894.43 (y7, 1+)<br>1007.51 (y8, 1+)<br>1078.55 (y9, 1+)    | 24.9 |
| QGVQIVQQQPQPQVGGCQVQVQGGQVAQPQQLAQMEAIR                                                                                                                                                                                                                                                                                                                                                                                                                                                                                                                                                                                                                                                                                                                                                              | I6TMV6-T4 | 6.77 | 1074.56<br>(4+) | 1284.67 (y11, +)<br>1009.56 (b9, 1+)<br>1234.65 (b11, 1+)  | 38.7 |
| APFVGVVTGVGGQ                                                                                                                                                                                                                                                                                                                                                                                                                                                                                                                                                                                                                                                                                                                                                                                        | I6TMV6-T5 | 6.04 | 594.33 (2+)     | 670.39 (b7, 1+)<br>828.46 (b9, 1+)<br>927.53 (b10, 1+)     | 29.7 |
| <b>MKILILILILAMATTFATSEMQVNPSVQVQPTQQQPYPESQQPFISQSPQQFPLPQQPFPQQPQQPFPQSQQQCLQQPQHQPFPQPTQQFPQRPLLPFTHPFLPFPDQLLPQPPHQS<br/> FPQPPQSYQPPLQFPFPQPPQKYPEQPQQPFPWQQPTIQLYLQQQLNSCKEFLLLQQCRPVSLLSYLWSKILQQSSCRMQQQCCLQLAQIPEQYKCTAIDSIVHAIFMQGQRQG<br/> VQIVQQQPQPQVGGCQVQVQGGQVAQPQQLAQMEAIRTLVLQSVPSMCNFMVPPNCSTIKAPFVGVVTGVGGQ</b>                                                                                                                                                                                                                                                                                                                                                                                                                                                                  |           |      |                 |                                                            |      |
| CTTIDSIVHAIFMQGQR                                                                                                                                                                                                                                                                                                                                                                                                                                                                                                                                                                                                                                                                                                                                                                                    | M0XYT2-T1 | 7.80 | 702.34 (2+)     | 894.43 (y7, 1+)<br>815.41 (y14, 2+)<br>922.48 (y16, 2+)    | 25.3 |
| QGVQIVQQQPQPQEVGGCQVQVQGR                                                                                                                                                                                                                                                                                                                                                                                                                                                                                                                                                                                                                                                                                                                                                                            | M0XYT2-T2 | 5.44 | 901.80 (3+)     | 1016.51 (y9, 1+)<br>1115.58 (y10, 1+)<br>1244.62 (y11, 1+) | 32.5 |
| DIVQPQQLAQMEAIR                                                                                                                                                                                                                                                                                                                                                                                                                                                                                                                                                                                                                                                                                                                                                                                      | M0XYT2-T3 | 6.21 | 870.46 (2+)     | 931.50 (y8, 1+)<br>1059.56 (y9, 1+)<br>1284.67 (y11, 1+)   | 43.5 |
| APFFSLVNAGML                                                                                                                                                                                                                                                                                                                                                                                                                                                                                                                                                                                                                                                                                                                                                                                         | M0XYT2-T4 | 9.17 | 633.83 (2+)     | 663.35 (b6, 1+)<br>762.42 (b7, 1+)<br>876.46 (b8, 1+)      | 31.7 |
| <b>MKILILILILAMATSFATSEMQVNPSVQVQPTQQQTHPESQQPF IHHSQQQFPQPQQSFPQQPQQPFPQSQQPCLQQPQHQPFPQPSQFPFRQPLQFPFRPFLPFPPEQPLPQPPQES<br/> FPQPPQSYQPPLQFPFPQPPQESFPQPPQSYQPPLLQFPFPQQQYPEQPQQPFPPRPPQEQFPNQPQQPFPWQQPSIQLYLQQQLNPKCKEFLLLQQCRPVSLSYLWSKIVQQSNC<br/> QVMQEQCCLQLAQIPEQYKCTTIDSIVHAIFMQGQRQGVQIVQQQPQPQEVGGCQVQVQGRDIVQPQQLAQMEAIRSLVLQSVPAMCNFMVPPNCSTMRAPFFSLVNAGML</b>                                                                                                                                                                                                                                                                                                                                                                                                                        |           |      |                 |                                                            |      |

|                                                                                                                                                                                                                                                                                                                                                                  |               |      |             |                                                            |      |
|------------------------------------------------------------------------------------------------------------------------------------------------------------------------------------------------------------------------------------------------------------------------------------------------------------------------------------------------------------------|---------------|------|-------------|------------------------------------------------------------|------|
| DVVQPQQLAQMEAIR                                                                                                                                                                                                                                                                                                                                                  | TC131355-T1   | 5.88 | 863.45 (2+) | 931.50 (y8, 1+)<br>1059.56 (y9, 1+)<br>1284.67 (y11, 1+)   | 43.2 |
| MKILILILILAMATSFATSEMQVNPSVQVQPTQQQTHPESQQPF IHHSQQQFPQPQQSFPQPQPFPQSQQPCLQQPQHQPFPQPSQPFPQQPLQSFPRPFLPFPEQPLPQPQPES<br>FPQPQSYPPQLPFPQPQPQESFPQPQPQSYPPQLLPFPQPQPQQQYEPQPQPFPRPPEQFPNQPQPFPWQQPSIQLYLQQLHNPCKEFLQCRPVSLVSYLWSKIVQQSNC<br>QVMQEQCCLQLAQIPEQYKCTTIDSIVHAIFLQQGQRQGVQIVQQQPQPQEVGQCVLVQGRD <b>VVQPQQLAQMEAIR</b> SLVLQSVPMCNFNVPNCSTMRAPFFSLVNAGML |               |      |             |                                                            |      |
| APFVGVVSGVGGQ                                                                                                                                                                                                                                                                                                                                                    | A0A287EEZ9-T1 | 5.82 | 587.32 (2+) | 670.39 (b7, 1+)<br>814.45 (b9, 1+)<br>913.52 (b10, 1+)     | 29.4 |
| MKILILILILAMATTFATSEMQVNPSVQVQPTQQQPYPESSQQPFISSQSQQFPQPQPFPQPQPFPQSQQCLQQPQHXLQCRPVSLLSYLWSKILQSSCRMVQQQCCCLQLA<br>QIPEQYKCTAIDSIVHAIIFMQGQRQGVQIVQQQPQPQVGVQCVLVQGGVVPQQLAQMEAIRTLVLQSVPSMCMFNVPNCSTIK <b>APFVGVVSGVGGQ</b>                                                                                                                                    |               |      |             |                                                            |      |
| EFLQQLCTLDEK                                                                                                                                                                                                                                                                                                                                                     | I6TEV2-T1     | 5.44 | 762.36 (2+) | 893.38 (y7, 1+)<br>1021.44 (y8, 1+)<br>1134.53 (y9, 1+)    | 38.1 |
| QQCCQLANINEQSR                                                                                                                                                                                                                                                                                                                                                   | I6TEV2-T2     | 3.13 | 938.90 (2+) | 1044.54 (y9, 1+)<br>1172.60 (y10, 1+)<br>1300.66 (y11, 1+) | 47.0 |
| MKIFLLFSLLGVATAITTTTMMQFNPSGLELERPQQLFPPQWQPLPQQPPFLQOEPEQYPYQQQPLPQQQFPQPQPLPHQHQPFPQQLPQQQFPQQMPLPQQQPQFPQQKPFQYQQ<br>PLTQQPYPQQPLAQQQPSIEEQHQLNLCK <b>EFLQQLCTLDEK</b> VPLLQSVISFLRPHISQQNSCQLKR <b>QQCCQLANINEQSR</b> CPAIQTIVHAIVMQQQQQQVQQQVDHGFVQSQLQ<br>QLGQGMPILQLQQQPGQAFVLPQQQAQFKVVVGLSVIQTLPMLCNVHVPPYCSFPGSMATGSGGQ                                |               |      |             |                                                            |      |
| <i>Chymotrypsin-derived peptides</i>                                                                                                                                                                                                                                                                                                                             |               |      |             |                                                            |      |
| VQGVSQPQQSQL                                                                                                                                                                                                                                                                                                                                                     | I6SJ26-C1     | 3.50 | 713.868     | 828.421 (y7, 1+)<br>952.485 (b9, 1+)<br>1080.543 (b10, 1+) | 34.0 |
| GIDTRVGV                                                                                                                                                                                                                                                                                                                                                         | I6SJ26-C2     | 3.55 | 408.732     | 430.277 (y4, 1+)<br>531.325 (y5, 1+)<br>646.352 (y7, 1+)   | 19.0 |
| MKTFLIFALLAIVATSTIAQQQPYPQPQPFPQPPIPQPQPFPQPQPYPQPQPFPQPPIPQPQPYPQPQPFPQPPIPQPQPYPQPQPFPQPPIPQPQPYPQPQPFPPLQPFPSQQPFPQPFPWQQQ<br>PVLSSQQPCTPQQTPLPQGGQDQMLVQVQIPFVHPSILQQLNPKVFLQQQCSPVAMSQR IARSQMLQQSSCYVLQQCCQQLPQIPEQFRHEAVRAIVYSIVLQEQPQQL <b>VQGV</b><br><b>QPQQSQL</b> HQVQCSFQQPQPQGGQQQVQSVFLQPLQLAQLEATASIALRTLPMMSVNVPPFYRILPF <b>GIDTRVGV</b>        |               |      |             |                                                            |      |
| AIDTRVGV                                                                                                                                                                                                                                                                                                                                                         | I6SW30-C1     | 3.50 | 415.740     | 430.277 (y4, 1+)<br>531.325 (y5, 1+)<br>646.352 (y6, 1+)   | 19.4 |
| MKTFLIFALLAIVATSTIAQQQPYPQPQPFPQPPIPQPQPFPQPQPFPQPPIPQPQPYPQPQPFPQPPIPQPQPYPQPQPFPQPPIPQPQPYPQPQPFPQPPIPQPQPYPQPQPFPPLQPFPSQQPFPQPFPWQQQ<br>QVQIPFVHPSILQQLNPKVFLQQQCSPVAMSQR IARSQMLQQSSCHVLQQCCQQLPQIPEQLRHEAVRAIVYSIVLQEQSLQLVQGVSQPQQQSQQQQVQCSFQQPQPQGGQ<br>QQVQSVLLQPHQIAQLEATTSIALRTLPTMCSVNVPLYRIVPL <b>AIDTRVGV</b>                                     |               |      |             |                                                            |      |
| QKEKVGQCSF                                                                                                                                                                                                                                                                                                                                                       | I6TRT2-C1     | 5.28 | 605.780     | 697.297 (y6, 1+)<br>825.392 (y7, 1+)<br>954.435 (y8, 1+)   | 28.7 |

|                                                                                                                                                                                                                                                                                                                    |           |      |         |                                                              |      |
|--------------------------------------------------------------------------------------------------------------------------------------------------------------------------------------------------------------------------------------------------------------------------------------------------------------------|-----------|------|---------|--------------------------------------------------------------|------|
| GQPQQVPQSVF                                                                                                                                                                                                                                                                                                        | I6TRT2-C2 | 4.70 | 607.812 | 577.298 (y5, 1+)<br>638.326 (b6, 1+)<br>863.437 (b8, 1+)     | 28.8 |
| MKTFLIFALLVIAATSTIAQQQPYPQQPFQPPFPQQTTIPQQPQPYPQQPQPYPQQPFPPQQEFPQQPPFWQQPFPQQPPFGLQQRILSQQQPCTPQQTPLPQQGLYQTLQLQ<br>IPYVHPSILQQLNPKVFLQQCCSPVRMPQLIARLQMLQLSSCHVLQQCCQQLPQISEQFRHEAIRAIVYSIFLQEQPQQSVQGVSTQQQL <b>QQEKVQCSF</b> QQPQPQL <b>GQPQQ</b><br><b>VPQSVFLQPHQIAQLEATT</b> SIALRTLPRMCNVNPLYDIMPDPFWH     |           |      |         |                                                              |      |
| QQKPFQPPF                                                                                                                                                                                                                                                                                                          | P06470-C1 | 5.11 | 671.351 | 726.393 (b6, 1+)<br>854.452 (b7, 1+)<br>982.511 (b8, 1+)     | 31.9 |
| RHEAIRAIVY                                                                                                                                                                                                                                                                                                         | P06470-C2 | 6.26 | 614.352 | 805.493 (y7, 1+)<br>934.536 (y8, 1+)<br>1071.595 (y9, 1+)    | 29.1 |
| RGVGPSVGV                                                                                                                                                                                                                                                                                                          | P06470-C3 | 3.39 | 414.240 | 554.305 (b6, 1+)<br>653.373 (b7, 1+)<br>710.394 (b8, 1+)     | 19.3 |
| MKTFLIFALLAIAATSTIAQQQFPQPPIQQPQPYPQQPQPYPQQPFPPQQPFPQQPVPQQPQPYPQQPFPPQQPFPQQPFFW <b>QQKPFQPPF</b> GLQQPILSQQQPCTPQQTPLP<br>QQGLYQTLQLQIQYVHPSILQQLNPKVFLQQCCSPVPVQRIARSQMLQQSSCHVLQQCCQQLPQIPEQFRHEAIRAIVYSIFLQEQPQQLVQGVSTQQQLWPPQVQCSFQ<br>QPQPQQVGGQQQVPSAFLQPHQIAQLEATTSIALRTLPMMSVNVPLYRIL <b>RGVGPSVGV</b> |           |      |         |                                                              |      |
| LPQKPFVQPPF                                                                                                                                                                                                                                                                                                        | Q40053-C1 | 5.98 | 713.399 | 907.541 (b8, 1+)<br>1035.599 (b9, 1+)<br>1163.658 (b10, 1+)  | 34.0 |
| QPQQPFPQGSEQIIPQQPFPL                                                                                                                                                                                                                                                                                              | Q40053-C2 | 8.01 | 802.081 | 826.446 (y7, 1+)<br>939.530 (y8, 1+)<br>1095.522 (b10, 1+)   | 36.5 |
| QPQFPQQPQQLPQPQQPF                                                                                                                                                                                                                                                                                                 | Q40053-C3 | 6.37 | 785.734 | 951.468 (b8, 1+)<br>841.420 (y7, 1+)<br>1051.557 (y9, 1+)    | 35.7 |
| IIPQQPQQLPL                                                                                                                                                                                                                                                                                                        | Q40053-C4 | 6.53 | 686.403 | 732.461 (y7, 1+)<br>933.515 (b8, 1+)<br>1143.652 (b10, 1+)   | 32.6 |
| MKTFLTFVLLAMVMSIVTTARQLNPSSQELQSPQSYLQQPYPQNPY <b>LPQKPFVQPPF</b> HTPQQYFPYLPEELFPQYQIPTPLPQQPFPQQPQQPLPRPQQPFPWQPQQPFPQPQ<br>EPIQQPQQPFPQQPQQPFPQQPQQIIFQQPQQSYVPQQPFPQPQPVPQQRPPQASPLQPQPQQASPL <b>QPQQPFPQGSEQIIPQQPFP</b> LQPQFPQQPQQPL <b>QPQQPFP</b> RQQAE<br><b>LIIPQQPQQPLPL</b> QPHQPYTQQTIWSMV           |           |      |         |                                                              |      |
| LPQQPFPVQPPF                                                                                                                                                                                                                                                                                                       | Q41210-C1 | 6.97 | 713.380 | 808.435 (b7, 1+)<br>907.504 (b8, 1+)<br>1035.562 (b9, 1+)    | 34.0 |
| QPQQPFPQQPQQLPRPQQPFPW                                                                                                                                                                                                                                                                                             | Q41210-C2 | 7.15 | 932.145 | 1079.527 (b9, 1+)<br>1152.595 (y9, 1+)<br>1362.732 (y11, 1+) | 42.7 |

|                                                                                                                                                                                                                                                                                                                                                                                                                                                                                                                                                                                                     |           |      |          |                                                                |      |
|-----------------------------------------------------------------------------------------------------------------------------------------------------------------------------------------------------------------------------------------------------------------------------------------------------------------------------------------------------------------------------------------------------------------------------------------------------------------------------------------------------------------------------------------------------------------------------------------------------|-----------|------|----------|----------------------------------------------------------------|------|
| QPQQPFPQPQQPIAHQPQQPF                                                                                                                                                                                                                                                                                                                                                                                                                                                                                                                                                                               | Q41210-C3 | 5.54 | 822.749  | 1162.600 (y10, 1+)<br>951.468 (b8, 1+)<br>1102.553 (b19, 2+)   | 37.5 |
| SQQPQQPFPL                                                                                                                                                                                                                                                                                                                                                                                                                                                                                                                                                                                          | Q41210-C4 | 5.86 | 585.301  | 697.326 (b6, 1+)<br>941.448 (b7, 1+)<br>826.446 (y6, 1+)       | 27.7 |
| QPQQPFPQPQQPFPQPQQIIF                                                                                                                                                                                                                                                                                                                                                                                                                                                                                                                                                                               | Q41210-C5 | 7.54 | 925.473  | 1098.594 (y9, 1+)<br>951.468 (b8, 1+)<br>1079.527 (b9, 1+)     | 42.4 |
| MKTFLTFVLLAMVMSIVTTARQLNPSSQELQSPQQSYLQQPYQPQNPYLPQQPFPVQQPFHTPQQYFPYLPEELSPQYQIPTPLQPQQPFPQQPQQPLPRPQQPFPWQPQQPFPQPQ<br>QPIPYQPQQPFPNQQPQQIISQQPQQPFPQQPQQPFPQPQQPFPWQPQQPFPQPQQPFPLOPQQPFPWQPQQPFPQPQQPIAHQPQQPFSFSQQPQQPFPLOPQQPFPQQPQQPFPQ<br>QPQQIIFQQPQQSYVPVQPQQPFPQPQVPVQQRPOQASPLQPQQPFPQGGSEQIIPQQPQQPFPLOPHQPYTQQTIIWSMV                                                                                                                                                                                                                                                                 |           |      |          |                                                                |      |
| IIPQQPQQPFPL                                                                                                                                                                                                                                                                                                                                                                                                                                                                                                                                                                                        | P17991-C1 | 6.95 | 703.396  | 826.446 (y7, 1+)<br>933.515 (b8, 1+)<br>1177.636 (b10, 1+)     | 33.5 |
| FPQPQEPFPQQPQQPFPLOPQQPFPQQPQQPFPQPQQPFRQQAELIIPQQPQQPFPLOPHQPYTQQTIIWSMV                                                                                                                                                                                                                                                                                                                                                                                                                                                                                                                           |           |      |          |                                                                |      |
| EQQTEVPSKGGSF                                                                                                                                                                                                                                                                                                                                                                                                                                                                                                                                                                                       | I6TRS8-C1 | 3.12 | 697.333  | 679.341 (y7, 1+)<br>778.409 (y8, 1+)<br>907.452 (y9, 1+)       | 33.2 |
| QSATSPQQPGQGQGQQETYPIATSPHQPGQW                                                                                                                                                                                                                                                                                                                                                                                                                                                                                                                                                                     | I6TRS8-C2 | 5.00 | 1107.184 | 1221.601 (y11, 1+)<br>1318.654 (y12, 1+)<br>1246.583 (y23, 2+) | 51.1 |
| YPIATSPQQPGQGQQL                                                                                                                                                                                                                                                                                                                                                                                                                                                                                                                                                                                    | I6TRS8-C3 | 4.80 | 856.934  | 727.373 (y7, 1+)<br>858.436 (b8, 1+)<br>986.494 (b9, 1+)       | 41.0 |
| GQGQQPGHGQQL                                                                                                                                                                                                                                                                                                                                                                                                                                                                                                                                                                                        | I6TRS8-C4 | 1.74 | 617.800  | 736.374 (y7, 1+)<br>1049.512 (y10, 1+)<br>847.381 (b9, 1+)     | 29.3 |
| TQQKPGQGY                                                                                                                                                                                                                                                                                                                                                                                                                                                                                                                                                                                           | I6TRS8-C5 | 1.10 | 503.751  | 521.235 (y5, 1+)<br>649.330 (y6, 1+)<br>777.389 (y7, 1+)       | 23.7 |
| HVSVEQPSASL                                                                                                                                                                                                                                                                                                                                                                                                                                                                                                                                                                                         | I6TRS8-C6 | 3.86 | 577.296  | 680.336 (b6, 1+)<br>864.421 (b8, 1+)<br>935.458 (b9, 1+)       | 27.3 |
| MAKRLVLFVAVIVALVALTTAEREINGNNIFLDSRSRQLQCERELQESSLEACRRVVDQQLVGLPWSTGLQMCCCQQLRDVSPPCRVPVALSQVVRQYEQQTEVPSKGGSFYPPGGT<br>APPLQGGGWWGTSVKWYYPDQTSQQSWQGGQGYHQSVTSSQQPGQGQGSYPGSTFPPQPGQGQPGQRQPWSYPSATFPQQPGQGQGGQGYYPGATSLLPQGQGGQGPYQSATS<br>PQQPGQGQGGQETYPIATSPHQPGQWQQPGQGQGGYYPSTVTSPOQSGQGQGGYYPSTTSPQSGQGQQLGQGQPGQGQGGYYPSTTSPQSGQGQGGYYP<br>SGTSTQQPGQVQQLGQGQGGYYPPIATSPQQPGQGQQLGQGQPGHGQQLVQGQQQGQGGQGHYPSMTSPHQGTGQGQKGYYPSTTSPQSGQGQGGYYPSTTSPQSGQGSVQGACQHSTS<br>SPQQQAQGCQASSPKQGLGSLYYPGAYTQQKPGQGYNPGGTSPLHQGGGGFGGGLTTEQPQGGKQPFHCQQTTVSPHQGQQTTVSPHQGQQTTVSPHQGQQTTVSPHQGQQTTVS |           |      |          |                                                                |      |
