# Supplementary material for: Hordein Accumulation in Developing Barley Grains
Source: Front Plant Sci. 2019 May 16;10:649. doi: 10.3389/fpls.2019.00649 (PMC6532529; doi:10.3389/fpls.2019.00649)
Supplement: Supplementary file 3 [file Data_Sheet_3.xlsx]

## Sheet: Trypsin
Supplementary File 1A. Peptides identified in developing endosperm of barley cv Sloop after trypsin digestion.
N	Unused	Total	%Cov(95)	Accessions	Names	Contrib	Conf	Sequence	Modifications	ProteinModifications	Cleavages	dMass	Obs MW	Obs m/z	Theor MW	Theor m/z	Theor z	Sc	Spectrum	Acq Time	Intensity (Peptide)	PrecursorIntensityAcquisition	Apex Time (Peptide)	Elution Peak Width (Peptide)	MS2Counts
1	26.07	26.07	36.69	tr|A0A287NA39	Uncharacterized protein OS=Hordeum vulgare subsp. vulgare OX=112509 PE=3 SV=1	2	99	ALGLQLPFSEEADLSEMVDSSQGLEISHVF			cleaved F-H@C-term	0.0085695	3247.57	1083.53	3247.56	1083.53	3	24	5.1.1.6558.20	67.3029	15152.8	4756.44	66.75	0.57	14376.6
1	26.07	26.07	36.69	tr|A0A287NA39	Uncharacterized protein OS=Hordeum vulgare subsp. vulgare OX=112509 PE=3 SV=1	2	99	ALGLQLPFSEEADLSEMVDSSQGLEISHVFHK	Carbamidomethyl(E)@16			0.203169	3569.94	714.995	3569.73	714.954	5	21	7.1.1.5396.9	58.169	6006.73	5522.59	58.12	0.38	30144.5
1	26.07	26.07	36.69	tr|A0A287NA39	Uncharacterized protein OS=Hordeum vulgare subsp. vulgare OX=112509 PE=3 SV=1	2	99	DQLVAILGDGGAGDAK				0.091485	1498.85	750.434	1498.76	750.389	2	22	8.1.1.5519.6	42.669	101284	20574.7	42.15	0.38	51270.2
1	26.07	26.07	36.69	tr|A0A287NA39	Uncharacterized protein OS=Hordeum vulgare subsp. vulgare OX=112509 PE=3 SV=1	2	99	EDIAGVVVFVGHVTNPLISA				0.115985	2036.21	679.744	2036.09	679.705	3	21	7.1.1.5436.5	61.9409	33657.6	9794.24	61.54	0.38	25365.4
1	26.07	26.07	36.69	tr|A0A287NA39	Uncharacterized protein OS=Hordeum vulgare subsp. vulgare OX=112509 PE=3 SV=1	2	99	ELNALAEQVVQFVLANESSTGGPR				0.00375322	2528.29	843.771	2528.29	843.77	3	24	5.1.1.6572.17	68.6144	2610.73	2554.02	68.46	0.57	12043.7
1	26.07	26.07	36.69	tr|A0A287NA39	Uncharacterized protein OS=Hordeum vulgare subsp. vulgare OX=112509 PE=3 SV=1	2	99	KVDLVDFVANHPFLF			cleaved L-K@N-term; cleaved F-L@C-term; missed K-V@1	-0.00520497	1759.92	587.649	1759.93	587.651	3	21	5.1.1.6537.2	65.2424	2410.01	2336.45	65.29	0.57	11647.7
1	26.07	26.07	36.69	tr|A0A287NA39	Uncharacterized protein OS=Hordeum vulgare subsp. vulgare OX=112509 PE=3 SV=1	2	99	SLITAGAGGATR			cleaved L-S@N-term	0.0692735	1073.65	537.833	1073.58	537.799	2	12	2.1.1.2087.11	15.7205	696.36	655.86	15.84	1.14	1508.11
1	26.07	26.07	36.69	tr|A0A287NA39	Uncharacterized protein OS=Hordeum vulgare subsp. vulgare OX=112509 PE=3 SV=1	2	99	TLEAVGQVNSWVEQVTTGLIK				-0.00897022	2271.2	758.075	2271.21	758.078	3	19	5.1.1.6592.17	70.5092	2173.18	1684.66	71.27	1.99	23738.1
1	26.07	26.07	36.69	tr|A0A287NA39	Uncharacterized protein OS=Hordeum vulgare subsp. vulgare OX=112509 PE=3 SV=1	2	99	VDLVDFVANHPFLF			cleaved F-L@C-term	0.00642594	1631.84	816.928	1631.83	816.925	2	18	5.1.1.6555.18	67.0109	106966	8639.06	66.17	0.57	15866.4
1	26.07	26.07	36.69	tr|A0A287NA39	Uncharacterized protein OS=Hordeum vulgare subsp. vulgare OX=112509 PE=3 SV=1	1.76955	99	ELNALAEQVVQF			cleaved F-V@C-term	0.00322291	1359.71	680.861	1359.7	680.859	2	14	5.1.1.6588.7	70.0881	53.4162	53.4162			8356.38
1	26.07	26.07	36.69	tr|A0A287NA39	Uncharacterized protein OS=Hordeum vulgare subsp. vulgare OX=112509 PE=3 SV=1	1.69897	99	TLEAVGQVN			cleaved N-S@C-term	0.0426379	929.524	465.769	929.482	465.748	2	13	7.1.1.5099.4	29.9741	1324.62	839.49	29.77	0.38	1644.17
1	26.07	26.07	36.69	tr|A0A287NA39	Uncharacterized protein OS=Hordeum vulgare subsp. vulgare OX=112509 PE=3 SV=1	1.61979	99	VDLVDFVANHPF			cleaved F-L@C-term	-0.004168	1371.68	686.846	1371.68	686.848	2	11	5.1.1.6677.9	78.5414	605.11	497.39	78.71	1.42	4002.18
1	26.07	26.07	36.69	tr|A0A287NA39	Uncharacterized protein OS=Hordeum vulgare subsp. vulgare OX=112509 PE=3 SV=1	1.31876	99	ATTLATDVR	Acetyl@N-term	Acetyl@49	cleaved M-A@N-term	0.0467229	988.566	495.29	988.519	495.267	2	13	8.1.1.5473.5	38.294	7753.72	4817.04	38.17	0.19	7746.61
1	26.07	26.07	36.69	tr|A0A287NA39	Uncharacterized protein OS=Hordeum vulgare subsp. vulgare OX=112509 PE=3 SV=1	0.91364	89.97	QYISSSDNLK				0.0517372	1153.61	577.814	1153.56	577.788	2	10	5.1.1.6202.5	33.1954	146.83	140.12	33.37	1.13	555.549
1	26.07	26.07	36.69	tr|A0A287NA39	Uncharacterized protein OS=Hordeum vulgare subsp. vulgare OX=112509 PE=3 SV=1	0.248721	46.45	LSTEPEFIENHIPK				0.083717	1652.92	551.982	1652.84	551.954	3	19	8.1.1.5496.4	40.4693	311184	21196.7	40.15	0.28	36606
1	26.07	26.07	36.69	tr|A0A287NA39	Uncharacterized protein OS=Hordeum vulgare subsp. vulgare OX=112509 PE=3 SV=1	0.174574	38.2	RLSTEPEFIENHIPK			missed R-L@1	0.0927611	1809.03	453.266	1808.94	453.243	4	16	4.1.1.2282.3	24.831	10484.1	9065.82	24.7	0.85	25283.7
1	26.07	26.07	36.69	tr|A0A287NA39	Uncharacterized protein OS=Hordeum vulgare subsp. vulgare OX=112509 PE=3 SV=1	0.164944	99	VDLVDFVANHPFL			cleaved L-F@C-term	0.0856589	1484.85	743.433	1484.77	743.39	2	18	5.1.1.6506.13	62.3506	7399.96	6572.33	62.49	0.57	24566.9
1	26.07	26.07	36.69	tr|A0A287NA39	Uncharacterized protein OS=Hordeum vulgare subsp. vulgare OX=112509 PE=3 SV=1	0.157391	99	SFVEVNEEGTEAGAA			cleaved A-T@C-term	0.0951922	1508.76	755.386	1508.66	755.339	2	21	8.1.1.5475.18	38.5379	4588.97	4446.51	38.56	0.38	13277.2
1	26.07	26.07	36.69	tr|A0A287NA39	Uncharacterized protein OS=Hordeum vulgare subsp. vulgare OX=112509 PE=3 SV=1	0.00348834	66.27	QYISSSDNLKVLK	Carbamidomethyl(K)@10		missed K-V@10	0.0693793	1550.9	517.974	1550.83	517.951	3	16	5.1.1.6249.7	37.5801	4206.67	4169.53	37.82	0.57	24302.4
1	26.07	26.07	36.69	tr|A0A287NA39	Uncharacterized protein OS=Hordeum vulgare subsp. vulgare OX=112509 PE=3 SV=1	0.00217692	49.11	SLKPSFEELAVCQYK	Carbamidomethyl(C)@12		cleaved L-S@N-term	0.0950872	1797.99	600.338	1797.9	600.306	3	19	8.1.1.5496.10	40.4943	12067.3	9894.62	40.44	0.28	33098.6
1	26.07	26.07	36.69	tr|A0A287NA39	Uncharacterized protein OS=Hordeum vulgare subsp. vulgare OX=112509 PE=3 SV=1	0	99	ALGLQLPFSEEADLSEMVDSSQGLEISHVF			cleaved F-H@C-term	0.0085695	3247.57	1083.53	3247.56	1083.53	3	29	5.1.1.6550.20	66.5457	15152.8	13156.2	66.75	0.57	61221.7
1	26.07	26.07	36.69	tr|A0A287NA39	Uncharacterized protein OS=Hordeum vulgare subsp. vulgare OX=112509 PE=3 SV=1	0	99	ALGLQLPFSEEADLSEMVDSSQGLEISHVF			cleaved F-H@C-term	0.0085695	3247.57	1083.53	3247.56	1083.53	3	27	5.1.1.6551.20	66.6403	15152.8	14107.3	66.75	0.57	75813.1
1	26.07	26.07	36.69	tr|A0A287NA39	Uncharacterized protein OS=Hordeum vulgare subsp. vulgare OX=112509 PE=3 SV=1	0	99	ALGLQLPFSEEADLSEMVDSSQGLEISHVF			cleaved F-H@C-term	0.0085695	3247.57	1083.53	3247.56	1083.53	3	27	5.1.1.6552.21	66.7391	15152.8	15101	66.75	0.57	64317.2
1	26.07	26.07	36.69	tr|A0A287NA39	Uncharacterized protein OS=Hordeum vulgare subsp. vulgare OX=112509 PE=3 SV=1	0	99	ALGLQLPFSEEADLSEMVDSSQGLEISHVF			cleaved F-H@C-term	0.0085695	3247.57	1083.53	3247.56	1083.53	3	27	5.1.1.6553.21	66.8337	15152.8	14444.6	66.75	0.57	47873.1
1	26.07	26.07	36.69	tr|A0A287NA39	Uncharacterized protein OS=Hordeum vulgare subsp. vulgare OX=112509 PE=3 SV=1	0	99	ALGLQLPFSEEADLSEMVDSSQGLEISHVF			cleaved F-H@C-term	0.0085695	3247.57	1083.53	3247.56	1083.53	3	27	5.1.1.6554.21	66.9286	15152.8	13694.6	66.75	0.57	33671.4
1	26.07	26.07	36.69	tr|A0A287NA39	Uncharacterized protein OS=Hordeum vulgare subsp. vulgare OX=112509 PE=3 SV=1	0	99	ALGLQLPFSEEADLSEMVDSSQGLEISHVF			cleaved F-H@C-term	0.0085695	3247.57	1083.53	3247.56	1083.53	3	29	5.1.1.6555.21	67.0233	15152.8	12944.7	66.75	0.57	24761.4
1	26.07	26.07	36.69	tr|A0A287NA39	Uncharacterized protein OS=Hordeum vulgare subsp. vulgare OX=112509 PE=3 SV=1	0	99	ALGLQLPFSEEADLSEMVDSSQGLEISHVF			cleaved F-H@C-term	0.0085695	3247.57	1083.53	3247.56	1083.53	3	24	5.1.1.6556.21	67.1178	15152.8	10251	66.75	0.57	20308.2
1	26.07	26.07	36.69	tr|A0A287NA39	Uncharacterized protein OS=Hordeum vulgare subsp. vulgare OX=112509 PE=3 SV=1	0	99	ALGLQLPFSEEADLSEMVDSSQGLEISHVF			cleaved F-H@C-term	0.0085695	3247.57	1083.53	3247.56	1083.53	3	26	5.1.1.6557.20	67.2081	15152.8	7570.48	66.75	0.57	16836.4
1	26.07	26.07	36.69	tr|A0A287NA39	Uncharacterized protein OS=Hordeum vulgare subsp. vulgare OX=112509 PE=3 SV=1	0	99	ALGLQLPFSEEADLSEMVDSSQGLEISHVF			cleaved F-H@C-term	-0.0052209	3247.55	1083.53	3247.56	1083.53	3	27	7.1.1.5464.21	64.65	14553.1	11555.2	64.75	0.28	36189.7
1	26.07	26.07	36.69	tr|A0A287NA39	Uncharacterized protein OS=Hordeum vulgare subsp. vulgare OX=112509 PE=3 SV=1	0	99	ALGLQLPFSEEADLSEMVDSSQGLEISHVF			cleaved F-H@C-term	-0.0052209	3247.55	1083.53	3247.56	1083.53	3	29	7.1.1.5465.21	64.7445	14553.1	14408	64.75	0.28	47330.6
1	26.07	26.07	36.69	tr|A0A287NA39	Uncharacterized protein OS=Hordeum vulgare subsp. vulgare OX=112509 PE=3 SV=1	0	99	ALGLQLPFSEEADLSEMVDSSQGLEISHVF			cleaved F-H@C-term	-0.0052209	3247.55	1083.53	3247.56	1083.53	3	28	7.1.1.5466.21	64.8392	14553.1	13357.6	64.75	0.28	38423.4
1	26.07	26.07	36.69	tr|A0A287NA39	Uncharacterized protein OS=Hordeum vulgare subsp. vulgare OX=112509 PE=3 SV=1	0	99	ALGLQLPFSEEADLSEMVDSSQGLEISHVF			cleaved F-H@C-term	-0.0052209	3247.55	1083.53	3247.56	1083.53	3	26	7.1.1.5467.21	64.9336	14553.1	8694.55	64.75	0.28	25918.9
1	26.07	26.07	36.69	tr|A0A287NA39	Uncharacterized protein OS=Hordeum vulgare subsp. vulgare OX=112509 PE=3 SV=1	0	99	ALGLQLPFSEEADLSEMVDSSQGLEISHVF			cleaved F-H@C-term	-0.0052209	3247.55	1083.53	3247.56	1083.53	3	24	7.1.1.5468.21	65.028	14553.1	5289.77	64.75	0.28	17980.4
1	26.07	26.07	36.69	tr|A0A287NA39	Uncharacterized protein OS=Hordeum vulgare subsp. vulgare OX=112509 PE=3 SV=1	0	99	ALGLQLPFSEEADLSEMVDSSQGLEISHVF			cleaved F-H@C-term	-0.0052209	3247.55	1083.53	3247.56	1083.53	3	25	7.1.1.5469.21	65.1226	14553.1	3324.63	64.75	0.28	14325.1
1	26.07	26.07	36.69	tr|A0A287NA39	Uncharacterized protein OS=Hordeum vulgare subsp. vulgare OX=112509 PE=3 SV=1	0	99	ALGLQLPFSEEADLSEMVDSSQGLEISHVF			cleaved F-H@C-term	-0.0052209	3247.55	1083.53	3247.56	1083.53	3	21	7.1.1.5472.20	65.4022	14553.1	1651.31	64.75	0.28	10415.4
1	26.07	26.07	36.69	tr|A0A287NA39	Uncharacterized protein OS=Hordeum vulgare subsp. vulgare OX=112509 PE=3 SV=1	0	99	ALGLQLPFSEEADLSEMVDSSQGLEISHVF			cleaved F-H@C-term	0.0246003	3247.58	1083.54	3247.56	1083.53	3	26	6.1.1.5688.21	64.5004	18806.2	16575.8	64.75	0.85	58636.7
1	26.07	26.07	36.69	tr|A0A287NA39	Uncharacterized protein OS=Hordeum vulgare subsp. vulgare OX=112509 PE=3 SV=1	0	99	ALGLQLPFSEEADLSEMVDSSQGLEISHVF			cleaved F-H@C-term	0.0246003	3247.58	1083.54	3247.56	1083.53	3	31	6.1.1.5689.21	64.5951	18806.2	17365.9	64.75	0.85	78708
1	26.07	26.07	36.69	tr|A0A287NA39	Uncharacterized protein OS=Hordeum vulgare subsp. vulgare OX=112509 PE=3 SV=1	0	99	ALGLQLPFSEEADLSEMVDSSQGLEISHVF			cleaved F-H@C-term	0.0246003	3247.58	1083.54	3247.56	1083.53	3	29	6.1.1.5690.21	64.6898	18806.2	18067	64.75	0.85	66908.7
1	26.07	26.07	36.69	tr|A0A287NA39	Uncharacterized protein OS=Hordeum vulgare subsp. vulgare OX=112509 PE=3 SV=1	0	99	ALGLQLPFSEEADLSEMVDSSQGLEISHVF			cleaved F-H@C-term	0.0246003	3247.58	1083.54	3247.56	1083.53	3	30	6.1.1.5691.21	64.7846	18806.2	18769.1	64.75	0.85	45845.2
1	26.07	26.07	36.69	tr|A0A287NA39	Uncharacterized protein OS=Hordeum vulgare subsp. vulgare OX=112509 PE=3 SV=1	0	99	ALGLQLPFSEEADLSEMVDSSQGLEISHVF			cleaved F-H@C-term	0.0246003	3247.58	1083.54	3247.56	1083.53	3	27	6.1.1.5692.21	64.8791	18806.2	16031.8	64.75	0.85	30893.8
1	26.07	26.07	36.69	tr|A0A287NA39	Uncharacterized protein OS=Hordeum vulgare subsp. vulgare OX=112509 PE=3 SV=1	0	99	ALGLQLPFSEEADLSEMVDSSQGLEISHVF			cleaved F-H@C-term	0.0246003	3247.58	1083.54	3247.56	1083.53	3	25	6.1.1.5693.21	64.9736	18806.2	13103.6	64.75	0.85	24333.6
1	26.07	26.07	36.69	tr|A0A287NA39	Uncharacterized protein OS=Hordeum vulgare subsp. vulgare OX=112509 PE=3 SV=1	0	99	ALGLQLPFSEEADLSEMVDSSQGLEISHVF			cleaved F-H@C-term	0.0246003	3247.58	1083.54	3247.56	1083.53	3	26	6.1.1.5694.20	65.0639	18806.2	10304.5	64.75	0.85	19823.7
1	26.07	26.07	36.69	tr|A0A287NA39	Uncharacterized protein OS=Hordeum vulgare subsp. vulgare OX=112509 PE=3 SV=1	0	99	ALGLQLPFSEEADLSEMVDSSQGLEISHVF			cleaved F-H@C-term	0.0246003	3247.58	1083.54	3247.56	1083.53	3	24	6.1.1.5696.20	65.2528	18806.2	5734.93	64.75	0.85	13952
1	26.07	26.07	36.69	tr|A0A287NA39	Uncharacterized protein OS=Hordeum vulgare subsp. vulgare OX=112509 PE=3 SV=1	0	99	ALGLQLPFSEEADLSEMVDSSQGLEISHVF			cleaved F-H@C-term	0.0246003	3247.58	1083.54	3247.56	1083.53	3	22	6.1.1.5697.21	65.3513	18806.2	3385.88	64.75	0.85	12133.8
1	26.07	26.07	36.69	tr|A0A287NA39	Uncharacterized protein OS=Hordeum vulgare subsp. vulgare OX=112509 PE=3 SV=1	0	99	ALGLQLPFSEEADLSEMVDSSQGLEISHVF			cleaved F-H@C-term	0.0246003	3247.58	1083.54	3247.56	1083.53	3	22	6.1.1.5699.20	65.5363	18806.2	2119.78	64.75	0.85	11735.5
1	26.07	26.07	36.69	tr|A0A287NA39	Uncharacterized protein OS=Hordeum vulgare subsp. vulgare OX=112509 PE=3 SV=1	0	99	ALGLQLPFSEEADLSEMVDSSQGLEISHVF			cleaved F-H@C-term	0.221918	3247.78	1083.6	3247.56	1083.53	3	25	8.1.1.5754.21	65.0062	25860.4	17738.2	64.83	0.28	40255.1
1	26.07	26.07	36.69	tr|A0A287NA39	Uncharacterized protein OS=Hordeum vulgare subsp. vulgare OX=112509 PE=3 SV=1	0	99	ALGLQLPFSEEADLSEMVDSSQGLEISHVF			cleaved F-H@C-term	0.221918	3247.78	1083.6	3247.56	1083.53	3	25	8.1.1.5755.21	65.1007	25860.4	11411.3	64.83	0.28	29344
1	26.07	26.07	36.69	tr|A0A287NA39	Uncharacterized protein OS=Hordeum vulgare subsp. vulgare OX=112509 PE=3 SV=1	0	99	ALGLQLPFSEEADLSEMVDSSQGLEISHVF			cleaved F-H@C-term	0.221918	3247.78	1083.6	3247.56	1083.53	3	23	8.1.1.5756.21	65.1953	25860.4	8284.36	64.83	0.28	22719
1	26.07	26.07	36.69	tr|A0A287NA39	Uncharacterized protein OS=Hordeum vulgare subsp. vulgare OX=112509 PE=3 SV=1	0	95.8	ALGLQLPFSEEADLSEMVDSSQGLEISHVF			cleaved F-H@C-term	0.221918	3247.78	1083.6	3247.56	1083.53	3	24	8.1.1.5752.21	64.8169	25860.4	25504.4	64.83	0.28	63185.8
1	26.07	26.07	36.69	tr|A0A287NA39	Uncharacterized protein OS=Hordeum vulgare subsp. vulgare OX=112509 PE=3 SV=1	0	95.8	ALGLQLPFSEEADLSEMVDSSQGLEISHVF			cleaved F-H@C-term	0.221918	3247.78	1083.6	3247.56	1083.53	3	24	8.1.1.5753.21	64.9116	25860.4	23167.8	64.83	0.28	54706.2
1	26.07	26.07	36.69	tr|A0A287NA39	Uncharacterized protein OS=Hordeum vulgare subsp. vulgare OX=112509 PE=3 SV=1	0	26.94	ALGLQLPFSEEADLSEMVDSSQGLEISHVFHK	Carbamidomethyl(D)@19			0.203169	3569.94	714.995	3569.73	714.954	5	21	7.1.1.5396.9	58.169	6006.73	5522.59	58.12	0.38	30144.5
1	26.07	26.07	36.69	tr|A0A287NA39	Uncharacterized protein OS=Hordeum vulgare subsp. vulgare OX=112509 PE=3 SV=1	0	15.64	ALGLQLPFSEEADLSEMVDSSQGLEISHVFHK	Carbamidomethyl(S)@20			0.203169	3569.94	714.995	3569.73	714.954	5	21	7.1.1.5396.9	58.169	6006.73	5522.59	58.12	0.38	30144.5
1	26.07	26.07	36.69	tr|A0A287NA39	Uncharacterized protein OS=Hordeum vulgare subsp. vulgare OX=112509 PE=3 SV=1	0	15.64	ALGLQLPFSEEADLSEMVDSSQGLEISHVFHK	Carbamidomethyl(S)@21			0.203169	3569.94	714.995	3569.73	714.954	5	21	7.1.1.5396.9	58.169	6006.73	5522.59	58.12	0.38	30144.5
1	26.07	26.07	36.69	tr|A0A287NA39	Uncharacterized protein OS=Hordeum vulgare subsp. vulgare OX=112509 PE=3 SV=1	0	15.64	ALGLQLPFSEEADLSEMVDSSQGLEISHVFHK	Carbamidomethyl(S)@15			0.203169	3569.94	714.995	3569.73	714.954	5	21	7.1.1.5396.9	58.169	6006.73	5522.59	58.12	0.38	30144.5
1	26.07	26.07	36.69	tr|A0A287NA39	Uncharacterized protein OS=Hordeum vulgare subsp. vulgare OX=112509 PE=3 SV=1	0	99	ATTLATDVR	Acetyl@N-term	Acetyl@49	cleaved M-A@N-term	0.0467229	988.566	495.29	988.519	495.267	2	13	8.1.1.5471.6	38.11	7753.72	7025.79	38.17	0.19	16904.9
1	26.07	26.07	36.69	tr|A0A287NA39	Uncharacterized protein OS=Hordeum vulgare subsp. vulgare OX=112509 PE=3 SV=1	0	99	ATTLATDVR	Acetyl@N-term	Acetyl@49	cleaved M-A@N-term	0.0467229	988.566	495.29	988.519	495.267	2	13	8.1.1.5472.6	38.2041	7753.72	7122.31	38.17	0.19	15393.6
1	26.07	26.07	36.69	tr|A0A287NA39	Uncharacterized protein OS=Hordeum vulgare subsp. vulgare OX=112509 PE=3 SV=1	0	63.44	ATTLATDVR	Acetyl@N-term	Acetyl@49	cleaved M-A@N-term	0.048737	988.568	495.291	988.519	495.267	2	13	7.1.1.5128.4	32.7201	5109.85	4776.6	32.69	0.19	14759.8
1	26.07	26.07	36.69	tr|A0A287NA39	Uncharacterized protein OS=Hordeum vulgare subsp. vulgare OX=112509 PE=3 SV=1	0	55.58	ATTLATDVR	Acetyl@N-term	Acetyl@49	cleaved M-A@N-term	0.048737	988.568	495.291	988.519	495.267	2	14	7.1.1.5127.4	32.6243	5109.85	4732.81	32.69	0.19	15027.1
1	26.07	26.07	36.69	tr|A0A287NA39	Uncharacterized protein OS=Hordeum vulgare subsp. vulgare OX=112509 PE=3 SV=1	0	51.69	ATTLATDVR	Acetyl@N-term	Acetyl@49	cleaved M-A@N-term	0.0467229	988.566	495.29	988.519	495.267	2	12	8.1.1.5470.5	38.0112	7753.72	4255.44	38.17	0.19	5906.55
1	26.07	26.07	36.69	tr|A0A287NA39	Uncharacterized protein OS=Hordeum vulgare subsp. vulgare OX=112509 PE=3 SV=1	0	99	DQLVAILGDGGAGDAK				0.0885553	1498.85	750.433	1498.76	750.389	2	28	6.1.1.5397.9	36.8928	72071.5	62037.1	36.76	0.76	123086
1	26.07	26.07	36.69	tr|A0A287NA39	Uncharacterized protein OS=Hordeum vulgare subsp. vulgare OX=112509 PE=3 SV=1	0	98.51	DQLVAILGDGGAGDAK				0.0885553	1498.85	750.433	1498.76	750.389	2	21	6.1.1.5406.6	37.7475	72071.5	15058	36.76	0.76	36581.5
1	26.07	26.07	36.69	tr|A0A287NA39	Uncharacterized protein OS=Hordeum vulgare subsp. vulgare OX=112509 PE=3 SV=1	0	97.05	DQLVAILGDGGAGDAK				0.0857477	1498.85	750.432	1498.76	750.389	2	26	5.1.1.6300.9	42.8089	199214	39936.4	41.82	0.6	82739.6
1	26.07	26.07	36.69	tr|A0A287NA39	Uncharacterized protein OS=Hordeum vulgare subsp. vulgare OX=112509 PE=3 SV=1	0	95.1	DQLVAILGDGGAGDAK				0.0885553	1498.85	750.433	1498.76	750.389	2	21	6.1.1.5403.10	37.4812	72071.5	18549.5	36.76	0.76	47400.1
1	26.07	26.07	36.69	tr|A0A287NA39	Uncharacterized protein OS=Hordeum vulgare subsp. vulgare OX=112509 PE=3 SV=1	0	75.79	DQLVAILGDGGAGDAK				0.0857477	1498.85	750.432	1498.76	750.389	2	25	5.1.1.6298.11	42.4563	199214	77323.9	41.82	0.6	121889
1	26.07	26.07	36.69	tr|A0A287NA39	Uncharacterized protein OS=Hordeum vulgare subsp. vulgare OX=112509 PE=3 SV=1	0	75.79	DQLVAILGDGGAGDAK				0.0857477	1498.85	750.432	1498.76	750.389	2	24	5.1.1.6299.12	42.5548	199214	67169.4	41.82	0.6	105283
1	26.07	26.07	36.69	tr|A0A287NA39	Uncharacterized protein OS=Hordeum vulgare subsp. vulgare OX=112509 PE=3 SV=1	0	69.92	DQLVAILGDGGAGDAK				0.088067	1498.85	750.433	1498.76	750.389	2	22	7.1.1.5174.12	37.1461	201401	26990.4	36.33	0.5	63350.1
1	26.07	26.07	36.69	tr|A0A287NA39	Uncharacterized protein OS=Hordeum vulgare subsp. vulgare OX=112509 PE=3 SV=1	0	61.05	DQLVAILGDGGAGDAK				0.088067	1498.85	750.433	1498.76	750.389	2	22	7.1.1.5175.9	37.2285	201401	24472.9	36.33	0.5	62557.8
1	26.07	26.07	36.69	tr|A0A287NA39	Uncharacterized protein OS=Hordeum vulgare subsp. vulgare OX=112509 PE=3 SV=1	0	59.1	DQLVAILGDGGAGDAK				0.0857477	1498.85	750.432	1498.76	750.389	2	24	5.1.1.6297.9	42.3491	199214	100738	41.82	0.6	143638
1	26.07	26.07	36.69	tr|A0A287NA39	Uncharacterized protein OS=Hordeum vulgare subsp. vulgare OX=112509 PE=3 SV=1	0	56.23	DQLVAILGDGGAGDAK				0.088067	1498.85	750.433	1498.76	750.389	2	25	7.1.1.5173.10	37.0437	201401	30544	36.33	0.5	69840.5
1	26.07	26.07	36.69	tr|A0A287NA39	Uncharacterized protein OS=Hordeum vulgare subsp. vulgare OX=112509 PE=3 SV=1	0	53	DQLVAILGDGGAGDAK				0.088067	1498.85	750.433	1498.76	750.389	2	23	7.1.1.5172.10	36.9494	201401	36084.9	36.33	0.5	81300.6
1	26.07	26.07	36.69	tr|A0A287NA39	Uncharacterized protein OS=Hordeum vulgare subsp. vulgare OX=112509 PE=3 SV=1	0	51.63	DQLVAILGDGGAGDAK				0.0857477	1498.85	750.432	1498.76	750.389	2	27	5.1.1.6291.9	41.7559	199214	190605	41.82	0.6	432678
1	26.07	26.07	36.69	tr|A0A287NA39	Uncharacterized protein OS=Hordeum vulgare subsp. vulgare OX=112509 PE=3 SV=1	0	50.49	DQLVAILGDGGAGDAK				0.088067	1498.85	750.433	1498.76	750.389	2	28	7.1.1.5164.6	36.1568	201401	159326	36.33	0.5	272807
1	26.07	26.07	36.69	tr|A0A287NA39	Uncharacterized protein OS=Hordeum vulgare subsp. vulgare OX=112509 PE=3 SV=1	0	50.49	DQLVAILGDGGAGDAK				0.088067	1498.85	750.433	1498.76	750.389	2	23	7.1.1.5176.10	37.3269	201401	21265.5	36.33	0.5	59775.7
1	26.07	26.07	36.69	tr|A0A287NA39	Uncharacterized protein OS=Hordeum vulgare subsp. vulgare OX=112509 PE=3 SV=1	0	49.11	DQLVAILGDGGAGDAK				0.091485	1498.85	750.434	1498.76	750.389	2	23	8.1.1.5518.6	42.5735	101284	28975.5	42.15	0.38	60662
1	26.07	26.07	36.69	tr|A0A287NA39	Uncharacterized protein OS=Hordeum vulgare subsp. vulgare OX=112509 PE=3 SV=1	0	47.89	DQLVAILGDGGAGDAK				0.0857477	1498.85	750.432	1498.76	750.389	2	24	5.1.1.6301.10	42.9087	199214	31129.2	41.82	0.6	78392
1	26.07	26.07	36.69	tr|A0A287NA39	Uncharacterized protein OS=Hordeum vulgare subsp. vulgare OX=112509 PE=3 SV=1	0	33.88	DQLVAILGDGGAGDAK				0.088067	1498.85	750.433	1498.76	750.389	2	25	7.1.1.5163.6	36.054	201401	119943	36.33	0.5	192261
1	26.07	26.07	36.69	tr|A0A287NA39	Uncharacterized protein OS=Hordeum vulgare subsp. vulgare OX=112509 PE=3 SV=1	0	32.91	DQLVAILGDGGAGDAK				0.088067	1498.85	750.433	1498.76	750.389	2	23	7.1.1.5178.14	37.5335	201401	16812.8	36.33	0.5	56376.3
1	26.07	26.07	36.69	tr|A0A287NA39	Uncharacterized protein OS=Hordeum vulgare subsp. vulgare OX=112509 PE=3 SV=1	0	32.47	DQLVAILGDGGAGDAK				0.0857477	1498.85	750.432	1498.76	750.389	2	26	5.1.1.6296.11	42.2618	199214	127721	41.82	0.6	172280
1	26.07	26.07	36.69	tr|A0A287NA39	Uncharacterized protein OS=Hordeum vulgare subsp. vulgare OX=112509 PE=3 SV=1	0	20.15	DQLVAILGDGGAGDAK				0.088067	1498.85	750.433	1498.76	750.389	2	23	7.1.1.5171.12	36.8635	201401	44635.6	36.33	0.5	96629.6
1	26.07	26.07	36.69	tr|A0A287NA39	Uncharacterized protein OS=Hordeum vulgare subsp. vulgare OX=112509 PE=3 SV=1	0	15.97	DQLVAILGDGGAGDAK				0.0857477	1498.85	750.432	1498.76	750.389	2	24	5.1.1.6303.10	43.0978	199214	24596.2	41.82	0.6	67548.2
1	26.07	26.07	36.69	tr|A0A287NA39	Uncharacterized protein OS=Hordeum vulgare subsp. vulgare OX=112509 PE=3 SV=1	0	99	EDIAGVVVFVGHVTNPLISA				0.112872	2036.21	679.743	2036.09	679.705	3	21	5.1.1.6522.7	63.8429	13584.6	12166.4	63.63	0.57	33769.7
1	26.07	26.07	36.69	tr|A0A287NA39	Uncharacterized protein OS=Hordeum vulgare subsp. vulgare OX=112509 PE=3 SV=1	0	91.66	EDIAGVVVFVGHVTNPLISA				0.112872	2036.21	679.743	2036.09	679.705	3	17	5.1.1.6515.5	63.1712	13584.6	7053.74	63.63	0.57	20457.2
1	26.07	26.07	36.69	tr|A0A287NA39	Uncharacterized protein OS=Hordeum vulgare subsp. vulgare OX=112509 PE=3 SV=1	0	91.66	EDIAGVVVFVGHVTNPLISA				0.112872	2036.21	679.743	2036.09	679.705	3	20	5.1.1.6518.7	63.4638	13584.6	11826	63.63	0.57	29607.3
1	26.07	26.07	36.69	tr|A0A287NA39	Uncharacterized protein OS=Hordeum vulgare subsp. vulgare OX=112509 PE=3 SV=1	0	24.36	EDIAGVVVFVGHVTNPLISA				0.115985	2036.21	679.744	2036.09	679.705	3	24	7.1.1.5431.9	61.484	33657.6	31164.3	61.54	0.38	64594.1
1	26.07	26.07	36.69	tr|A0A287NA39	Uncharacterized protein OS=Hordeum vulgare subsp. vulgare OX=112509 PE=3 SV=1	0	22.91	EDIAGVVVFVGHVTNPLISA				0.117816	2036.21	679.745	2036.09	679.705	3	22	7.1.1.5423.7	60.7193	24904.6	24087.8	60.69	0.66	48763.9
1	26.07	26.07	36.69	tr|A0A287NA39	Uncharacterized protein OS=Hordeum vulgare subsp. vulgare OX=112509 PE=3 SV=1	0	16.39	EDIAGVVVFVGHVTNPLISA				0.112689	2036.21	679.743	2036.09	679.705	3	22	8.1.1.5722.8	61.9267	42387.5	26677.6	61.7	0.76	47746.6
1	26.07	26.07	36.69	tr|A0A287NA39	Uncharacterized protein OS=Hordeum vulgare subsp. vulgare OX=112509 PE=3 SV=1	0	99	ELNALAEQVVQF			cleaved F-V@C-term	0.00358909	1359.71	680.861	1359.7	680.859	2	13	5.1.1.6589.7	70.1833	2548.83	2510.5	70.72	2.56	8562.64
1	26.07	26.07	36.69	tr|A0A287NA39	Uncharacterized protein OS=Hordeum vulgare subsp. vulgare OX=112509 PE=3 SV=1	0	99	ELNALAEQVVQF			cleaved F-V@C-term	0.00358909	1359.71	680.861	1359.7	680.859	2	14	5.1.1.6592.9	70.4758	2548.83	2539.74	70.72	2.56	8138.88
1	26.07	26.07	36.69	tr|A0A287NA39	Uncharacterized protein OS=Hordeum vulgare subsp. vulgare OX=112509 PE=3 SV=1	0	99	ELNALAEQVVQF			cleaved F-V@C-term	0.00358909	1359.71	680.861	1359.7	680.859	2	14	5.1.1.6594.8	70.6612	2548.83	2497.48	70.72	2.56	8235.38
1	26.07	26.07	36.69	tr|A0A287NA39	Uncharacterized protein OS=Hordeum vulgare subsp. vulgare OX=112509 PE=3 SV=1	0	99	ELNALAEQVVQF			cleaved F-V@C-term	0.00358909	1359.71	680.861	1359.7	680.859	2	15	5.1.1.6595.8	70.7559	2548.83	2478.66	70.72	2.56	7903.62
1	26.07	26.07	36.69	tr|A0A287NA39	Uncharacterized protein OS=Hordeum vulgare subsp. vulgare OX=112509 PE=3 SV=1	0	99	ELNALAEQVVQF			cleaved F-V@C-term	0.00358909	1359.71	680.861	1359.7	680.859	2	14	5.1.1.6596.7	70.8464	2548.83	2465.09	70.72	2.56	8048.62
1	26.07	26.07	36.69	tr|A0A287NA39	Uncharacterized protein OS=Hordeum vulgare subsp. vulgare OX=112509 PE=3 SV=1	0	99	ELNALAEQVVQF			cleaved F-V@C-term	0.00358909	1359.71	680.861	1359.7	680.859	2	13	5.1.1.6598.7	71.0358	2548.83	2428.71	70.72	2.56	7852.06
1	26.07	26.07	36.69	tr|A0A287NA39	Uncharacterized protein OS=Hordeum vulgare subsp. vulgare OX=112509 PE=3 SV=1	0	99	ELNALAEQVVQF			cleaved F-V@C-term	0.00358909	1359.71	680.861	1359.7	680.859	2	14	5.1.1.6600.7	71.2254	2548.83	2352.01	70.72	2.56	8045.31
1	26.07	26.07	36.69	tr|A0A287NA39	Uncharacterized protein OS=Hordeum vulgare subsp. vulgare OX=112509 PE=3 SV=1	0	99	ELNALAEQVVQF			cleaved F-V@C-term	0.00358909	1359.71	680.861	1359.7	680.859	2	14	5.1.1.6602.7	71.4151	2548.83	2264.57	70.72	2.56	9055.9
1	26.07	26.07	36.69	tr|A0A287NA39	Uncharacterized protein OS=Hordeum vulgare subsp. vulgare OX=112509 PE=3 SV=1	0	99	ELNALAEQVVQF			cleaved F-V@C-term	0.00358909	1359.71	680.861	1359.7	680.859	2	14	5.1.1.6604.8	71.6087	2548.83	2202.11	70.72	2.56	8354.38
1	26.07	26.07	36.69	tr|A0A287NA39	Uncharacterized protein OS=Hordeum vulgare subsp. vulgare OX=112509 PE=3 SV=1	0	99	ELNALAEQVVQF			cleaved F-V@C-term	0.00358909	1359.71	680.861	1359.7	680.859	2	14	5.1.1.6607.8	71.8925	2548.83	2303.95	70.72	2.56	7637.92
1	26.07	26.07	36.69	tr|A0A287NA39	Uncharacterized protein OS=Hordeum vulgare subsp. vulgare OX=112509 PE=3 SV=1	0	99	ELNALAEQVVQF			cleaved F-V@C-term	0.00358909	1359.71	680.861	1359.7	680.859	2	14	5.1.1.6610.5	72.1645	2548.83	2314.9	70.72	2.56	7951.12
1	26.07	26.07	36.69	tr|A0A287NA39	Uncharacterized protein OS=Hordeum vulgare subsp. vulgare OX=112509 PE=3 SV=1	0	99	ELNALAEQVVQF			cleaved F-V@C-term	0.00358909	1359.71	680.861	1359.7	680.859	2	13	5.1.1.6611.6	72.2635	2548.83	2402.98	70.72	2.56	7784.11
1	26.07	26.07	36.69	tr|A0A287NA39	Uncharacterized protein OS=Hordeum vulgare subsp. vulgare OX=112509 PE=3 SV=1	0	99	ELNALAEQVVQF			cleaved F-V@C-term	0.00358909	1359.71	680.861	1359.7	680.859	2	13	5.1.1.6612.8	72.3667	2548.83	2494.73	70.72	2.56	7721.36
1	26.07	26.07	36.69	tr|A0A287NA39	Uncharacterized protein OS=Hordeum vulgare subsp. vulgare OX=112509 PE=3 SV=1	0	99	ELNALAEQVVQF			cleaved F-V@C-term	0.00358909	1359.71	680.861	1359.7	680.859	2	14	5.1.1.6613.5	72.4489	2548.83	2535.38	70.72	2.56	7883.56
1	26.07	26.07	36.69	tr|A0A287NA39	Uncharacterized protein OS=Hordeum vulgare subsp. vulgare OX=112509 PE=3 SV=1	0	99	ELNALAEQVVQF			cleaved F-V@C-term	0.00358909	1359.71	680.861	1359.7	680.859	2	13	5.1.1.6614.6	72.5477	2548.83	2483.96	70.72	2.56	7857.68
1	26.07	26.07	36.69	tr|A0A287NA39	Uncharacterized protein OS=Hordeum vulgare subsp. vulgare OX=112509 PE=3 SV=1	0	99	ELNALAEQVVQF			cleaved F-V@C-term	0.00358909	1359.71	680.861	1359.7	680.859	2	14	5.1.1.6615.7	72.6471	2548.83	2432.27	70.72	2.56	7779.17
1	26.07	26.07	36.69	tr|A0A287NA39	Uncharacterized protein OS=Hordeum vulgare subsp. vulgare OX=112509 PE=3 SV=1	0	99	ELNALAEQVVQF			cleaved F-V@C-term	0.0787693	1359.78	680.898	1359.7	680.859	2	18	7.1.1.5404.6	58.915	6041.63	5554.35	58.79	1.8	15694.1
1	26.07	26.07	36.69	tr|A0A287NA39	Uncharacterized protein OS=Hordeum vulgare subsp. vulgare OX=112509 PE=3 SV=1	0	99	ELNALAEQVVQF			cleaved F-V@C-term	0.0803562	1359.78	680.899	1359.7	680.859	2	16	7.1.1.5405.4	59.0016	5626.69	5199.37	58.98	0.66	15110.8
1	26.07	26.07	36.69	tr|A0A287NA39	Uncharacterized protein OS=Hordeum vulgare subsp. vulgare OX=112509 PE=3 SV=1	0	99	ELNALAEQVVQF			cleaved F-V@C-term	-0.000206527	1359.7	680.859	1359.7	680.859	2	17	7.1.1.5551.7	72.8324	2569.75	2376.43	72.61	1.14	7785.36
1	26.07	26.07	36.69	tr|A0A287NA39	Uncharacterized protein OS=Hordeum vulgare subsp. vulgare OX=112509 PE=3 SV=1	0	99	ELNALAEQVVQF			cleaved F-V@C-term	-0.000206527	1359.7	680.859	1359.7	680.859	2	16	7.1.1.5553.9	73.0305	2569.75	2260.62	72.61	1.14	7877.62
1	26.07	26.07	36.69	tr|A0A287NA39	Uncharacterized protein OS=Hordeum vulgare subsp. vulgare OX=112509 PE=3 SV=1	0	99	ELNALAEQVVQF			cleaved F-V@C-term	0.00382142	1359.71	680.861	1359.7	680.859	2	15	7.1.1.5557.11	73.418	2393.72	2309.93	73.56	0.76	7316.85
1	26.07	26.07	36.69	tr|A0A287NA39	Uncharacterized protein OS=Hordeum vulgare subsp. vulgare OX=112509 PE=3 SV=1	0	99	ELNALAEQVVQF			cleaved F-V@C-term	0.00382142	1359.71	680.861	1359.7	680.859	2	16	7.1.1.5561.9	73.7892	2393.72	2256.61	73.56	0.76	7326.1
1	26.07	26.07	36.69	tr|A0A287NA39	Uncharacterized protein OS=Hordeum vulgare subsp. vulgare OX=112509 PE=3 SV=1	0	99	ELNALAEQVVQF			cleaved F-V@C-term	0.00015965	1359.7	680.859	1359.7	680.859	2	15	7.1.1.5567.7	74.3504	2430.75	2353.25	74.23	0.85	7333.85
1	26.07	26.07	36.69	tr|A0A287NA39	Uncharacterized protein OS=Hordeum vulgare subsp. vulgare OX=112509 PE=3 SV=1	0	99	ELNALAEQVVQF			cleaved F-V@C-term	0.00382142	1359.71	680.861	1359.7	680.859	2	14	7.1.1.5600.10	77.4926	2038.38	1868.8	76.79	1.71	6219.82
1	26.07	26.07	36.69	tr|A0A287NA39	Uncharacterized protein OS=Hordeum vulgare subsp. vulgare OX=112509 PE=3 SV=1	0	99	ELNALAEQVVQF			cleaved F-V@C-term	0.00382142	1359.71	680.861	1359.7	680.859	2	14	7.1.1.5602.11	77.6868	2038.38	1920.02	76.79	1.71	6009.56
1	26.07	26.07	36.69	tr|A0A287NA39	Uncharacterized protein OS=Hordeum vulgare subsp. vulgare OX=112509 PE=3 SV=1	0	99	ELNALAEQVVQF			cleaved F-V@C-term	0.00382142	1359.71	680.861	1359.7	680.859	2	14	7.1.1.5603.10	77.7777	2038.38	1944.01	76.79	1.71	5957.8
1	26.07	26.07	36.69	tr|A0A287NA39	Uncharacterized protein OS=Hordeum vulgare subsp. vulgare OX=112509 PE=3 SV=1	0	99	ELNALAEQVVQF			cleaved F-V@C-term	0.0041876	1359.71	680.861	1359.7	680.859	2	14	7.1.1.5611.10	78.5367	1937.62	1807.28	78.87	1.71	5679.8
1	26.07	26.07	36.69	tr|A0A287NA39	Uncharacterized protein OS=Hordeum vulgare subsp. vulgare OX=112509 PE=3 SV=1	0	99	ELNALAEQVVQF			cleaved F-V@C-term	0.0041876	1359.71	680.861	1359.7	680.859	2	13	7.1.1.5612.10	78.6316	1937.62	1856.13	78.87	1.71	5633.55
1	26.07	26.07	36.69	tr|A0A287NA39	Uncharacterized protein OS=Hordeum vulgare subsp. vulgare OX=112509 PE=3 SV=1	0	99	ELNALAEQVVQF			cleaved F-V@C-term	0.00101406	1359.7	680.86	1359.7	680.859	2	16	7.1.1.5509.7	68.8501	2825.48	2618.62	69.1	0.95	8643.39
1	26.07	26.07	36.69	tr|A0A287NA39	Uncharacterized protein OS=Hordeum vulgare subsp. vulgare OX=112509 PE=3 SV=1	0	99	ELNALAEQVVQF			cleaved F-V@C-term	0.00296701	1359.71	680.861	1359.7	680.859	2	15	7.1.1.5531.9	70.944	2723.73	2657.99	71.09	1.14	8315.26
1	26.07	26.07	36.69	tr|A0A287NA39	Uncharacterized protein OS=Hordeum vulgare subsp. vulgare OX=112509 PE=3 SV=1	0	99	ELNALAEQVVQF			cleaved F-V@C-term	0.0041876	1359.71	680.861	1359.7	680.859	2	13	7.1.1.5613.10	78.7266	1937.62	1893.29	78.87	1.71	5582.05
1	26.07	26.07	36.69	tr|A0A287NA39	Uncharacterized protein OS=Hordeum vulgare subsp. vulgare OX=112509 PE=3 SV=1	0	99	ELNALAEQVVQF			cleaved F-V@C-term	0.000403768	1359.7	680.859	1359.7	680.859	2	14	7.1.1.5571.10	74.7424	2221.68	2090.55	74.89	1.14	6775.47
1	26.07	26.07	36.69	tr|A0A287NA39	Uncharacterized protein OS=Hordeum vulgare subsp. vulgare OX=112509 PE=3 SV=1	0	99	ELNALAEQVVQF			cleaved F-V@C-term	0.000403768	1359.7	680.859	1359.7	680.859	2	15	7.1.1.5574.8	75.0187	2221.68	2153.58	74.89	1.14	7104.09
1	26.07	26.07	36.69	tr|A0A287NA39	Uncharacterized protein OS=Hordeum vulgare subsp. vulgare OX=112509 PE=3 SV=1	0	99	ELNALAEQVVQF			cleaved F-V@C-term	0.00382142	1359.71	680.861	1359.7	680.859	2	14	7.1.1.5595.11	77.0224	2038.38	1890.33	76.79	1.71	7362.16
1	26.07	26.07	36.69	tr|A0A287NA39	Uncharacterized protein OS=Hordeum vulgare subsp. vulgare OX=112509 PE=3 SV=1	0	99	ELNALAEQVVQF			cleaved F-V@C-term	0.00382142	1359.71	680.861	1359.7	680.859	2	14	7.1.1.5597.10	77.208	2038.38	1897.97	76.79	1.71	6666.08
1	26.07	26.07	36.69	tr|A0A287NA39	Uncharacterized protein OS=Hordeum vulgare subsp. vulgare OX=112509 PE=3 SV=1	0	99	ELNALAEQVVQF			cleaved F-V@C-term	0.0774265	1359.78	680.898	1359.7	680.859	2	18	8.1.1.5700.5	59.8301	10788.4	5627.57	58.58	2.08	16479.9
1	26.07	26.07	36.69	tr|A0A287NA39	Uncharacterized protein OS=Hordeum vulgare subsp. vulgare OX=112509 PE=3 SV=1	0	99	ELNALAEQVVQF			cleaved F-V@C-term	3.75908e-05	1359.7	680.859	1359.7	680.859	2	15	7.1.1.5496.10	67.6315	3146.85	2860.13	67.49	1.51	8844.39
1	26.07	26.07	36.69	tr|A0A287NA39	Uncharacterized protein OS=Hordeum vulgare subsp. vulgare OX=112509 PE=3 SV=1	0	99	ELNALAEQVVQF			cleaved F-V@C-term	3.75908e-05	1359.7	680.859	1359.7	680.859	2	15	7.1.1.5502.8	68.1914	3146.85	2698.28	67.49	1.51	8283.38
1	26.07	26.07	36.69	tr|A0A287NA39	Uncharacterized protein OS=Hordeum vulgare subsp. vulgare OX=112509 PE=3 SV=1	0	99	ELNALAEQVVQF			cleaved F-V@C-term	0.00296701	1359.71	680.861	1359.7	680.859	2	15	7.1.1.5526.10	70.4746	2723.73	2533.62	71.09	1.14	8376.14
1	26.07	26.07	36.69	tr|A0A287NA39	Uncharacterized protein OS=Hordeum vulgare subsp. vulgare OX=112509 PE=3 SV=1	0	99	ELNALAEQVVQF			cleaved F-V@C-term	0.00296701	1359.71	680.861	1359.7	680.859	2	15	7.1.1.5533.9	71.1335	2711.52	2665.06	71.09	0.85	8369.13
1	26.07	26.07	36.69	tr|A0A287NA39	Uncharacterized protein OS=Hordeum vulgare subsp. vulgare OX=112509 PE=3 SV=1	0	99	ELNALAEQVVQF			cleaved F-V@C-term	0.000647886	1359.7	680.859	1359.7	680.859	2	14	7.1.1.5539.8	71.698	2765.05	2491.61	72.04	0.85	7702.61
1	26.07	26.07	36.69	tr|A0A287NA39	Uncharacterized protein OS=Hordeum vulgare subsp. vulgare OX=112509 PE=3 SV=1	0	99	ELNALAEQVVQF			cleaved F-V@C-term	-0.000206527	1359.7	680.859	1359.7	680.859	2	13	7.1.1.5547.9	72.4611	2569.75	2203.68	72.61	1.14	7216.91
1	26.07	26.07	36.69	tr|A0A287NA39	Uncharacterized protein OS=Hordeum vulgare subsp. vulgare OX=112509 PE=3 SV=1	0	99	ELNALAEQVVQF			cleaved F-V@C-term	-0.000206527	1359.7	680.859	1359.7	680.859	2	15	7.1.1.5548.12	72.5687	2569.75	2452.21	72.61	1.14	7966.62
1	26.07	26.07	36.69	tr|A0A287NA39	Uncharacterized protein OS=Hordeum vulgare subsp. vulgare OX=112509 PE=3 SV=1	0	99	ELNALAEQVVQF			cleaved F-V@C-term	-0.000206527	1359.7	680.859	1359.7	680.859	2	14	7.1.1.5549.9	72.651	2569.75	2533.2	72.61	1.14	7761.61
1	26.07	26.07	36.69	tr|A0A287NA39	Uncharacterized protein OS=Hordeum vulgare subsp. vulgare OX=112509 PE=3 SV=1	0	99	ELNALAEQVVQF			cleaved F-V@C-term	-0.000206527	1359.7	680.859	1359.7	680.859	2	14	7.1.1.5550.9	72.746	2569.75	2453.47	72.61	1.14	7549.36
1	26.07	26.07	36.69	tr|A0A287NA39	Uncharacterized protein OS=Hordeum vulgare subsp. vulgare OX=112509 PE=3 SV=1	0	99	ELNALAEQVVQF			cleaved F-V@C-term	0.00382142	1359.71	680.861	1359.7	680.859	2	15	7.1.1.5556.9	73.3149	2393.72	2210.96	73.56	0.76	7325.1
1	26.07	26.07	36.69	tr|A0A287NA39	Uncharacterized protein OS=Hordeum vulgare subsp. vulgare OX=112509 PE=3 SV=1	0	99	ELNALAEQVVQF			cleaved F-V@C-term	0.00382142	1359.71	680.861	1359.7	680.859	2	15	7.1.1.5558.9	73.5048	2393.72	2374.71	73.56	0.76	7472.35
1	26.07	26.07	36.69	tr|A0A287NA39	Uncharacterized protein OS=Hordeum vulgare subsp. vulgare OX=112509 PE=3 SV=1	0	99	ELNALAEQVVQF			cleaved F-V@C-term	0.00382142	1359.71	680.861	1359.7	680.859	2	14	7.1.1.5559.8	73.5953	2393.72	2369.39	73.56	0.76	7504.85
1	26.07	26.07	36.69	tr|A0A287NA39	Uncharacterized protein OS=Hordeum vulgare subsp. vulgare OX=112509 PE=3 SV=1	0	99	ELNALAEQVVQF			cleaved F-V@C-term	0.00382142	1359.71	680.861	1359.7	680.859	2	14	7.1.1.5560.10	73.6986	2393.72	2318.01	73.56	0.76	7148.35
1	26.07	26.07	36.69	tr|A0A287NA39	Uncharacterized protein OS=Hordeum vulgare subsp. vulgare OX=112509 PE=3 SV=1	0	99	ELNALAEQVVQF			cleaved F-V@C-term	0.000403768	1359.7	680.859	1359.7	680.859	2	14	7.1.1.5573.10	74.9322	2221.68	2209.66	74.89	1.14	7242.85
1	26.07	26.07	36.69	tr|A0A287NA39	Uncharacterized protein OS=Hordeum vulgare subsp. vulgare OX=112509 PE=3 SV=1	0	99	ELNALAEQVVQF			cleaved F-V@C-term	0.000403768	1359.7	680.859	1359.7	680.859	2	14	7.1.1.5575.12	75.1299	2221.68	2031.86	74.89	1.14	7054.84
1	26.07	26.07	36.69	tr|A0A287NA39	Uncharacterized protein OS=Hordeum vulgare subsp. vulgare OX=112509 PE=3 SV=1	0	99	ELNALAEQVVQF			cleaved F-V@C-term	0.000403768	1359.7	680.859	1359.7	680.859	2	14	7.1.1.5576.9	75.2121	2221.68	1967.74	74.89	1.14	6950.84
1	26.07	26.07	36.69	tr|A0A287NA39	Uncharacterized protein OS=Hordeum vulgare subsp. vulgare OX=112509 PE=3 SV=1	0	99	ELNALAEQVVQF			cleaved F-V@C-term	0.000403768	1359.7	680.859	1359.7	680.859	2	14	7.1.1.5577.10	75.311	2221.68	1948.92	74.89	1.14	6983.59
1	26.07	26.07	36.69	tr|A0A287NA39	Uncharacterized protein OS=Hordeum vulgare subsp. vulgare OX=112509 PE=3 SV=1	0	99	ELNALAEQVVQF			cleaved F-V@C-term	0.000403768	1359.7	680.859	1359.7	680.859	2	13	7.1.1.5579.10	75.5006	2221.68	1959.71	74.89	1.14	6923.58
1	26.07	26.07	36.69	tr|A0A287NA39	Uncharacterized protein OS=Hordeum vulgare subsp. vulgare OX=112509 PE=3 SV=1	0	99	ELNALAEQVVQF			cleaved F-V@C-term	0.000403768	1359.7	680.859	1359.7	680.859	2	14	7.1.1.5581.10	75.6902	2221.68	1879.06	74.89	1.14	6557.33
1	26.07	26.07	36.69	tr|A0A287NA39	Uncharacterized protein OS=Hordeum vulgare subsp. vulgare OX=112509 PE=3 SV=1	0	99	ELNALAEQVVQF			cleaved F-V@C-term	0.00382142	1359.71	680.861	1359.7	680.859	2	13	7.1.1.5588.12	76.3625	2038.38	1837.71	76.79	1.71	6447.77
1	26.07	26.07	36.69	tr|A0A287NA39	Uncharacterized protein OS=Hordeum vulgare subsp. vulgare OX=112509 PE=3 SV=1	0	99	ELNALAEQVVQF			cleaved F-V@C-term	0.00382142	1359.71	680.861	1359.7	680.859	2	13	7.1.1.5590.9	76.5396	2038.38	1989.41	76.79	1.71	6488.38
1	26.07	26.07	36.69	tr|A0A287NA39	Uncharacterized protein OS=Hordeum vulgare subsp. vulgare OX=112509 PE=3 SV=1	0	99	ELNALAEQVVQF			cleaved F-V@C-term	0.00382142	1359.71	680.861	1359.7	680.859	2	13	7.1.1.5592.10	76.7337	2038.38	2017.82	76.79	1.71	6499.32
1	26.07	26.07	36.69	tr|A0A287NA39	Uncharacterized protein OS=Hordeum vulgare subsp. vulgare OX=112509 PE=3 SV=1	0	99	ELNALAEQVVQF			cleaved F-V@C-term	0.00382142	1359.71	680.861	1359.7	680.859	2	14	7.1.1.5593.9	76.8244	2038.38	1991.2	76.79	1.71	6679.58
1	26.07	26.07	36.69	tr|A0A287NA39	Uncharacterized protein OS=Hordeum vulgare subsp. vulgare OX=112509 PE=3 SV=1	0	99	ELNALAEQVVQF			cleaved F-V@C-term	0.00382142	1359.71	680.861	1359.7	680.859	2	14	7.1.1.5594.10	76.9235	2038.38	1952.95	76.79	1.71	6685.83
1	26.07	26.07	36.69	tr|A0A287NA39	Uncharacterized protein OS=Hordeum vulgare subsp. vulgare OX=112509 PE=3 SV=1	0	99	ELNALAEQVVQF			cleaved F-V@C-term	0.00382142	1359.71	680.861	1359.7	680.859	2	14	7.1.1.5596.10	77.1131	2038.38	1868.92	76.79	1.71	7271.85
1	26.07	26.07	36.69	tr|A0A287NA39	Uncharacterized protein OS=Hordeum vulgare subsp. vulgare OX=112509 PE=3 SV=1	0	99	ELNALAEQVVQF			cleaved F-V@C-term	0.0041876	1359.71	680.861	1359.7	680.859	2	13	7.1.1.5614.11	78.8257	1937.62	1875.62	78.87	1.71	5602.8
1	26.07	26.07	36.69	tr|A0A287NA39	Uncharacterized protein OS=Hordeum vulgare subsp. vulgare OX=112509 PE=3 SV=1	0	99	ELNALAEQVVQF			cleaved F-V@C-term	0.00393539	1359.71	680.861	1359.7	680.859	2	16	6.1.1.5740.7	69.3616	55.6029	55.6029			8602.39
1	26.07	26.07	36.69	tr|A0A287NA39	Uncharacterized protein OS=Hordeum vulgare subsp. vulgare OX=112509 PE=3 SV=1	0	99	ELNALAEQVVQF			cleaved F-V@C-term	0.00100592	1359.7	680.86	1359.7	680.859	2	15	6.1.1.5747.10	70.0371	50.3808	50.3808			8483.64
1	26.07	26.07	36.69	tr|A0A287NA39	Uncharacterized protein OS=Hordeum vulgare subsp. vulgare OX=112509 PE=3 SV=1	0	99	ELNALAEQVVQF			cleaved F-V@C-term	0.00100592	1359.7	680.86	1359.7	680.859	2	16	6.1.1.5753.9	70.6018	47.3613	47.3613			8458.89
1	26.07	26.07	36.69	tr|A0A287NA39	Uncharacterized protein OS=Hordeum vulgare subsp. vulgare OX=112509 PE=3 SV=1	0	98.98	ELNALAEQVVQF			cleaved F-V@C-term	0.123447	1359.83	680.921	1359.7	680.859	2	12	3.1.1.2880.13	90.0067	914.08	905.23	88.62	2.85	3443.23
1	26.07	26.07	36.69	tr|A0A287NA39	Uncharacterized protein OS=Hordeum vulgare subsp. vulgare OX=112509 PE=3 SV=1	0	98.81	ELNALAEQVVQF			cleaved F-V@C-term	0.123447	1359.83	680.921	1359.7	680.859	2	11	3.1.1.2878.13	89.8169	914.08	912.05	88.62	2.85	3630.24
1	26.07	26.07	36.69	tr|A0A287NA39	Uncharacterized protein OS=Hordeum vulgare subsp. vulgare OX=112509 PE=3 SV=1	0	98.81	ELNALAEQVVQF			cleaved F-V@C-term	0.123447	1359.83	680.921	1359.7	680.859	2	12	3.1.1.2883.10	90.2788	914.08	821.99	88.62	2.85	3347.23
1	26.07	26.07	36.69	tr|A0A287NA39	Uncharacterized protein OS=Hordeum vulgare subsp. vulgare OX=112509 PE=3 SV=1	0	98.74	ELNALAEQVVQF			cleaved F-V@C-term	3.75908e-05	1359.7	680.859	1359.7	680.859	2	15	7.1.1.5491.8	67.1495	3146.85	2148.03	67.49	1.51	8114.87
1	26.07	26.07	36.69	tr|A0A287NA39	Uncharacterized protein OS=Hordeum vulgare subsp. vulgare OX=112509 PE=3 SV=1	0	98.74	ELNALAEQVVQF			cleaved F-V@C-term	3.75908e-05	1359.7	680.859	1359.7	680.859	2	14	7.1.1.5493.8	67.3389	3146.85	2975.16	67.49	1.51	8817.4
1	26.07	26.07	36.69	tr|A0A287NA39	Uncharacterized protein OS=Hordeum vulgare subsp. vulgare OX=112509 PE=3 SV=1	0	98.74	ELNALAEQVVQF			cleaved F-V@C-term	0.00101406	1359.7	680.86	1359.7	680.859	2	14	7.1.1.5508.8	68.7597	2825.48	2558.3	69.1	0.95	8238.88
1	26.07	26.07	36.69	tr|A0A287NA39	Uncharacterized protein OS=Hordeum vulgare subsp. vulgare OX=112509 PE=3 SV=1	0	98.74	ELNALAEQVVQF			cleaved F-V@C-term	0.00296701	1359.71	680.861	1359.7	680.859	2	15	7.1.1.5527.9	70.565	2723.73	2391.15	71.09	1.14	7967.12
1	26.07	26.07	36.69	tr|A0A287NA39	Uncharacterized protein OS=Hordeum vulgare subsp. vulgare OX=112509 PE=3 SV=1	0	98.74	ELNALAEQVVQF			cleaved F-V@C-term	0.00296701	1359.71	680.861	1359.7	680.859	2	13	7.1.1.5528.9	70.6598	2723.73	2240.37	71.09	1.14	7703.36
1	26.07	26.07	36.69	tr|A0A287NA39	Uncharacterized protein OS=Hordeum vulgare subsp. vulgare OX=112509 PE=3 SV=1	0	98.74	ELNALAEQVVQF			cleaved F-V@C-term	0.000647886	1359.7	680.859	1359.7	680.859	2	13	7.1.1.5540.8	71.7932	2765.05	2687.28	72.04	0.85	8076.62
1	26.07	26.07	36.69	tr|A0A287NA39	Uncharacterized protein OS=Hordeum vulgare subsp. vulgare OX=112509 PE=3 SV=1	0	98.74	ELNALAEQVVQF			cleaved F-V@C-term	-0.000206527	1359.7	680.859	1359.7	680.859	2	14	7.1.1.5554.10	73.1296	2569.75	2238.58	72.61	1.14	7972.12
1	26.07	26.07	36.69	tr|A0A287NA39	Uncharacterized protein OS=Hordeum vulgare subsp. vulgare OX=112509 PE=3 SV=1	0	98.74	ELNALAEQVVQF			cleaved F-V@C-term	0.00382142	1359.71	680.861	1359.7	680.859	2	13	7.1.1.5562.10	73.8885	2393.72	2124.39	73.56	0.76	7175.34
1	26.07	26.07	36.69	tr|A0A287NA39	Uncharacterized protein OS=Hordeum vulgare subsp. vulgare OX=112509 PE=3 SV=1	0	98.74	ELNALAEQVVQF			cleaved F-V@C-term	0.00015965	1359.7	680.859	1359.7	680.859	2	13	7.1.1.5564.9	74.0741	2430.75	2129.71	74.23	0.85	7626.56
1	26.07	26.07	36.69	tr|A0A287NA39	Uncharacterized protein OS=Hordeum vulgare subsp. vulgare OX=112509 PE=3 SV=1	0	98.74	ELNALAEQVVQF			cleaved F-V@C-term	0.00015965	1359.7	680.859	1359.7	680.859	2	13	7.1.1.5565.10	74.1731	2430.75	2360.5	74.23	0.85	7556.36
1	26.07	26.07	36.69	tr|A0A287NA39	Uncharacterized protein OS=Hordeum vulgare subsp. vulgare OX=112509 PE=3 SV=1	0	98.74	ELNALAEQVVQF			cleaved F-V@C-term	0.00382142	1359.71	680.861	1359.7	680.859	2	13	7.1.1.5599.10	77.3977	2038.38	1905.57	76.79	1.71	6235.57
1	26.07	26.07	36.69	tr|A0A287NA39	Uncharacterized protein OS=Hordeum vulgare subsp. vulgare OX=112509 PE=3 SV=1	0	98.3	ELNALAEQVVQF			cleaved F-V@C-term	0.076572	1359.78	680.897	1359.7	680.859	2	19	8.1.1.5832.8	72.3348	3108.36	3071.2	72.39	1.52	8999.4
1	26.07	26.07	36.69	tr|A0A287NA39	Uncharacterized protein OS=Hordeum vulgare subsp. vulgare OX=112509 PE=3 SV=1	0	96.74	ELNALAEQVVQF			cleaved F-V@C-term	0.00173829	1359.71	680.86	1359.7	680.859	2	14	6.1.1.5728.6	68.2219	57.377	57.377			8117.36
1	26.07	26.07	36.69	tr|A0A287NA39	Uncharacterized protein OS=Hordeum vulgare subsp. vulgare OX=112509 PE=3 SV=1	0	96.74	ELNALAEQVVQF			cleaved F-V@C-term	-0.0018015	1359.7	680.858	1359.7	680.859	2	16	6.1.1.5732.6	68.6004	57.8756	57.8756			9039.9
1	26.07	26.07	36.69	tr|A0A287NA39	Uncharacterized protein OS=Hordeum vulgare subsp. vulgare OX=112509 PE=3 SV=1	0	96.74	ELNALAEQVVQF			cleaved F-V@C-term	-0.00265593	1359.7	680.858	1359.7	680.859	2	16	6.1.1.5735.6	68.8841	59.4177	59.4177			8701.89
1	26.07	26.07	36.69	tr|A0A287NA39	Uncharacterized protein OS=Hordeum vulgare subsp. vulgare OX=112509 PE=3 SV=1	0	96.74	ELNALAEQVVQF			cleaved F-V@C-term	-0.00546335	1359.7	680.856	1359.7	680.859	2	15	6.1.1.5738.9	69.1806	55.6029	55.6029			9480.92
1	26.07	26.07	36.69	tr|A0A287NA39	Uncharacterized protein OS=Hordeum vulgare subsp. vulgare OX=112509 PE=3 SV=1	0	96.74	ELNALAEQVVQF			cleaved F-V@C-term	-0.000458823	1359.7	680.859	1359.7	680.859	2	15	6.1.1.5743.8	69.6493	53.5936	53.5936			8411.13
1	26.07	26.07	36.69	tr|A0A287NA39	Uncharacterized protein OS=Hordeum vulgare subsp. vulgare OX=112509 PE=3 SV=1	0	96.74	ELNALAEQVVQF			cleaved F-V@C-term	-0.00241181	1359.7	680.858	1359.7	680.859	2	14	6.1.1.5762.9	71.4538	41.809	41.809			8223.63
1	26.07	26.07	36.69	tr|A0A287NA39	Uncharacterized protein OS=Hordeum vulgare subsp. vulgare OX=112509 PE=3 SV=1	0	96.74	ELNALAEQVVQF			cleaved F-V@C-term	-0.00265593	1359.7	680.858	1359.7	680.859	2	14	6.1.1.5769.6	72.105	37.5531	37.5531			8100.44
1	26.07	26.07	36.69	tr|A0A287NA39	Uncharacterized protein OS=Hordeum vulgare subsp. vulgare OX=112509 PE=3 SV=1	0	96.53	ELNALAEQVVQF			cleaved F-V@C-term	0.00296701	1359.71	680.861	1359.7	680.859	2	16	7.1.1.5488.9	66.8701	2687.58	2630.01	66.45	1.04	8313.44
1	26.07	26.07	36.69	tr|A0A287NA39	Uncharacterized protein OS=Hordeum vulgare subsp. vulgare OX=112509 PE=3 SV=1	0	96.53	ELNALAEQVVQF			cleaved F-V@C-term	0.00101406	1359.7	680.86	1359.7	680.859	2	14	7.1.1.5512.9	69.1431	2825.48	2692.33	69.1	0.95	8643.14
1	26.07	26.07	36.69	tr|A0A287NA39	Uncharacterized protein OS=Hordeum vulgare subsp. vulgare OX=112509 PE=3 SV=1	0	96.53	ELNALAEQVVQF			cleaved F-V@C-term	0.00101406	1359.7	680.86	1359.7	680.859	2	14	7.1.1.5514.11	69.341	2825.48	2596.82	69.1	0.95	9085.15
1	26.07	26.07	36.69	tr|A0A287NA39	Uncharacterized protein OS=Hordeum vulgare subsp. vulgare OX=112509 PE=3 SV=1	0	96.53	ELNALAEQVVQF			cleaved F-V@C-term	0.00015965	1359.7	680.859	1359.7	680.859	2	13	7.1.1.5566.9	74.2639	2430.75	2421.1	74.23	0.85	7630.86
1	26.07	26.07	36.69	tr|A0A287NA39	Uncharacterized protein OS=Hordeum vulgare subsp. vulgare OX=112509 PE=3 SV=1	0	96.53	ELNALAEQVVQF			cleaved F-V@C-term	0.000403768	1359.7	680.859	1359.7	680.859	2	12	7.1.1.5580.9	75.5913	2221.68	1890.84	74.89	1.14	6713.51
1	26.07	26.07	36.69	tr|A0A287NA39	Uncharacterized protein OS=Hordeum vulgare subsp. vulgare OX=112509 PE=3 SV=1	0	96.53	ELNALAEQVVQF			cleaved F-V@C-term	0.0041876	1359.71	680.861	1359.7	680.859	2	12	7.1.1.5609.9	78.343	1937.62	1827.92	78.87	1.71	5928.81
1	26.07	26.07	36.69	tr|A0A287NA39	Uncharacterized protein OS=Hordeum vulgare subsp. vulgare OX=112509 PE=3 SV=1	0	96.11	ELNALAEQVVQF			cleaved F-V@C-term	0.0774265	1359.78	680.898	1359.7	680.859	2	18	8.1.1.5697.6	59.55	10788.4	6327.17	58.58	2.08	17706.2
1	26.07	26.07	36.69	tr|A0A287NA39	Uncharacterized protein OS=Hordeum vulgare subsp. vulgare OX=112509 PE=3 SV=1	0	95.4	ELNALAEQVVQF			cleaved F-V@C-term	0.120639	1359.82	680.919	1359.7	680.859	2	11	3.1.1.2810.14	83.3541	986.78	861.86	81.2	4.85	3621.24
1	26.07	26.07	36.69	tr|A0A287NA39	Uncharacterized protein OS=Hordeum vulgare subsp. vulgare OX=112509 PE=3 SV=1	0	94.77	ELNALAEQVVQF			cleaved F-V@C-term	0.0754734	1359.78	680.897	1359.7	680.859	2	16	5.1.1.6470.8	58.9157	7941.79	6703.15	59.36	2.28	17739.9
1	26.07	26.07	36.69	tr|A0A287NA39	Uncharacterized protein OS=Hordeum vulgare subsp. vulgare OX=112509 PE=3 SV=1	0	93.44	ELNALAEQVVQF			cleaved F-V@C-term	0.0771824	1359.78	680.898	1359.7	680.859	2	17	8.1.1.5846.11	73.6758	3108.36	2710.01	72.3	2.28	8721.89
1	26.07	26.07	36.69	tr|A0A287NA39	Uncharacterized protein OS=Hordeum vulgare subsp. vulgare OX=112509 PE=3 SV=1	0	93.44	ELNALAEQVVQF			cleaved F-V@C-term	0.0771824	1359.78	680.898	1359.7	680.859	2	16	8.1.1.5851.10	74.146	3108.36	2551.33	72.3	2.28	8626.39
1	26.07	26.07	36.69	tr|A0A287NA39	Uncharacterized protein OS=Hordeum vulgare subsp. vulgare OX=112509 PE=3 SV=1	0	93.44	ELNALAEQVVQF			cleaved F-V@C-term	0.0784031	1359.78	680.898	1359.7	680.859	2	15	8.1.1.5893.10	78.129	2413.05	2200.26	78.27	1.23	7125.59
1	26.07	26.07	36.69	tr|A0A287NA39	Uncharacterized protein OS=Hordeum vulgare subsp. vulgare OX=112509 PE=3 SV=1	0	92.61	ELNALAEQVVQF			cleaved F-V@C-term	0.00552219	1359.71	680.862	1359.7	680.859	2	14	6.1.1.5729.5	68.3126	54.4671	54.4671			8627.58
1	26.07	26.07	36.69	tr|A0A287NA39	Uncharacterized protein OS=Hordeum vulgare subsp. vulgare OX=112509 PE=3 SV=1	0	92.61	ELNALAEQVVQF			cleaved F-V@C-term	0.0029589	1359.71	680.861	1359.7	680.859	2	14	6.1.1.5746.9	69.9383	46.2854	46.2854			8610.64
1	26.07	26.07	36.69	tr|A0A287NA39	Uncharacterized protein OS=Hordeum vulgare subsp. vulgare OX=112509 PE=3 SV=1	0	92.61	ELNALAEQVVQF			cleaved F-V@C-term	0.00173829	1359.71	680.86	1359.7	680.859	2	14	6.1.1.5751.8	70.4078	49.0165	49.0165			8971.4
1	26.07	26.07	36.69	tr|A0A287NA39	Uncharacterized protein OS=Hordeum vulgare subsp. vulgare OX=112509 PE=3 SV=1	0	92.61	ELNALAEQVVQF			cleaved F-V@C-term	-0.00302212	1359.7	680.857	1359.7	680.859	2	14	6.1.1.5759.7	71.1614	47.301	47.301			8036.62
1	26.07	26.07	36.69	tr|A0A287NA39	Uncharacterized protein OS=Hordeum vulgare subsp. vulgare OX=112509 PE=3 SV=1	0	92.61	ELNALAEQVVQF			cleaved F-V@C-term	0.00161622	1359.71	680.86	1359.7	680.859	2	14	6.1.1.5760.7	71.2561	44.8573	44.8573			8221.63
1	26.07	26.07	36.69	tr|A0A287NA39	Uncharacterized protein OS=Hordeum vulgare subsp. vulgare OX=112509 PE=3 SV=1	0	92.61	ELNALAEQVVQF			cleaved F-V@C-term	0.00283684	1359.71	680.86	1359.7	680.859	2	13	6.1.1.5763.6	71.5362	39.528	39.528			8172.88
1	26.07	26.07	36.69	tr|A0A287NA39	Uncharacterized protein OS=Hordeum vulgare subsp. vulgare OX=112509 PE=3 SV=1	0	90.75	ELNALAEQVVQF			cleaved F-V@C-term	-0.000816822	1359.7	680.859	1359.7	680.859	2	15	7.1.1.5482.9	66.3028	3039.09	2357.77	65.7	1.8	8895.4
1	26.07	26.07	36.69	tr|A0A287NA39	Uncharacterized protein OS=Hordeum vulgare subsp. vulgare OX=112509 PE=3 SV=1	0	90.75	ELNALAEQVVQF			cleaved F-V@C-term	0.00296701	1359.71	680.861	1359.7	680.859	2	13	7.1.1.5530.9	70.8493	2723.73	2472.5	71.09	1.14	7603.11
1	26.07	26.07	36.69	tr|A0A287NA39	Uncharacterized protein OS=Hordeum vulgare subsp. vulgare OX=112509 PE=3 SV=1	0	90.75	ELNALAEQVVQF			cleaved F-V@C-term	0.000647886	1359.7	680.859	1359.7	680.859	2	13	7.1.1.5538.9	71.6074	2765.05	2231.68	72.04	0.85	7626.55
1	26.07	26.07	36.69	tr|A0A287NA39	Uncharacterized protein OS=Hordeum vulgare subsp. vulgare OX=112509 PE=3 SV=1	0	90.75	ELNALAEQVVQF			cleaved F-V@C-term	0.000403768	1359.7	680.859	1359.7	680.859	2	13	7.1.1.5572.8	74.8288	2221.68	2187.15	74.89	1.14	7182.6
1	26.07	26.07	36.69	tr|A0A287NA39	Uncharacterized protein OS=Hordeum vulgare subsp. vulgare OX=112509 PE=3 SV=1	0	90.75	ELNALAEQVVQF			cleaved F-V@C-term	0.000403768	1359.7	680.859	1359.7	680.859	2	13	7.1.1.5578.7	75.3935	2221.68	1976.15	74.89	1.14	6735.02
1	26.07	26.07	36.69	tr|A0A287NA39	Uncharacterized protein OS=Hordeum vulgare subsp. vulgare OX=112509 PE=3 SV=1	0	90.75	ELNALAEQVVQF			cleaved F-V@C-term	0.00382142	1359.71	680.861	1359.7	680.859	2	12	7.1.1.5591.12	76.647	2038.38	2010.59	76.79	1.71	6455.57
1	26.07	26.07	36.69	tr|A0A287NA39	Uncharacterized protein OS=Hordeum vulgare subsp. vulgare OX=112509 PE=3 SV=1	0	84.69	ELNALAEQVVQF			cleaved F-V@C-term	0.076572	1359.78	680.897	1359.7	680.859	2	16	8.1.1.5842.11	73.2964	3108.36	2637.01	72.39	1.52	9517.17
1	26.07	26.07	36.69	tr|A0A287NA39	Uncharacterized protein OS=Hordeum vulgare subsp. vulgare OX=112509 PE=3 SV=1	0	84.69	ELNALAEQVVQF			cleaved F-V@C-term	0.0771824	1359.78	680.898	1359.7	680.859	2	15	8.1.1.5848.8	73.853	3108.36	2606.6	72.3	2.28	8671.39
1	26.07	26.07	36.69	tr|A0A287NA39	Uncharacterized protein OS=Hordeum vulgare subsp. vulgare OX=112509 PE=3 SV=1	0	84.69	ELNALAEQVVQF			cleaved F-V@C-term	0.0749851	1359.78	680.896	1359.7	680.859	2	16	8.1.1.5855.8	74.5173	2623.26	2403.02	74.95	1.71	8299.13
1	26.07	26.07	36.69	tr|A0A287NA39	Uncharacterized protein OS=Hordeum vulgare subsp. vulgare OX=112509 PE=3 SV=1	0	84.69	ELNALAEQVVQF			cleaved F-V@C-term	0.0749851	1359.78	680.896	1359.7	680.859	2	15	8.1.1.5856.10	74.6203	2623.26	2188.13	74.95	1.71	7705.86
1	26.07	26.07	36.69	tr|A0A287NA39	Uncharacterized protein OS=Hordeum vulgare subsp. vulgare OX=112509 PE=3 SV=1	0	84	ELNALAEQVVQF			cleaved F-V@C-term	-0.00119119	1359.7	680.858	1359.7	680.859	2	13	6.1.1.5731.6	68.5059	57.6541	57.6541			9305.41
1	26.07	26.07	36.69	tr|A0A287NA39	Uncharacterized protein OS=Hordeum vulgare subsp. vulgare OX=112509 PE=3 SV=1	0	84	ELNALAEQVVQF			cleaved F-V@C-term	0.00442364	1359.71	680.861	1359.7	680.859	2	13	6.1.1.5742.7	69.5508	56.6565	56.6565			8315.13
1	26.07	26.07	36.69	tr|A0A287NA39	Uncharacterized protein OS=Hordeum vulgare subsp. vulgare OX=112509 PE=3 SV=1	0	84	ELNALAEQVVQF			cleaved F-V@C-term	-0.000825007	1359.7	680.859	1359.7	680.859	2	14	6.1.1.5748.10	70.1321	46.7994	46.7994			8808.9
1	26.07	26.07	36.69	tr|A0A287NA39	Uncharacterized protein OS=Hordeum vulgare subsp. vulgare OX=112509 PE=3 SV=1	0	84	ELNALAEQVVQF			cleaved F-V@C-term	0.00515601	1359.71	680.862	1359.7	680.859	2	13	6.1.1.5756.8	70.8812	48.7992	48.7992			8175.13
1	26.07	26.07	36.69	tr|A0A287NA39	Uncharacterized protein OS=Hordeum vulgare subsp. vulgare OX=112509 PE=3 SV=1	0	84	ELNALAEQVVQF			cleaved F-V@C-term	-0.00204562	1359.7	680.858	1359.7	680.859	2	12	6.1.1.5765.9	71.7382	41.4606	41.4606			7768.61
1	26.07	26.07	36.69	tr|A0A287NA39	Uncharacterized protein OS=Hordeum vulgare subsp. vulgare OX=112509 PE=3 SV=1	0	84	ELNALAEQVVQF			cleaved F-V@C-term	0.000151485	1359.7	680.859	1359.7	680.859	2	14	6.1.1.5766.8	71.8291	38.2978	38.2978			7905.12
1	26.07	26.07	36.69	tr|A0A287NA39	Uncharacterized protein OS=Hordeum vulgare subsp. vulgare OX=112509 PE=3 SV=1	0	84	ELNALAEQVVQF			cleaved F-V@C-term	0.00283684	1359.71	680.86	1359.7	680.859	2	13	6.1.1.5767.10	71.9321	40.8828	40.8828			7813.86
1	26.07	26.07	36.69	tr|A0A287NA39	Uncharacterized protein OS=Hordeum vulgare subsp. vulgare OX=112509 PE=3 SV=1	0	84	ELNALAEQVVQF			cleaved F-V@C-term	0.00283684	1359.71	680.86	1359.7	680.859	2	13	6.1.1.5768.10	72.0268	38.7084	38.7084			7922.37
1	26.07	26.07	36.69	tr|A0A287NA39	Uncharacterized protein OS=Hordeum vulgare subsp. vulgare OX=112509 PE=3 SV=1	0	77.95	ELNALAEQVVQF			cleaved F-V@C-term	0.00738374	1359.71	680.863	1359.7	680.859	2	13	5.1.1.6751.10	85.5696	21.4724	21.4724			3927.5
1	26.07	26.07	36.69	tr|A0A287NA39	Uncharacterized protein OS=Hordeum vulgare subsp. vulgare OX=112509 PE=3 SV=1	0	77.95	ELNALAEQVVQF			cleaved F-V@C-term	0.00372205	1359.71	680.861	1359.7	680.859	2	15	5.1.1.6752.10	85.6645	22.0145	22.0145			4010.25
1	26.07	26.07	36.69	tr|A0A287NA39	Uncharacterized protein OS=Hordeum vulgare subsp. vulgare OX=112509 PE=3 SV=1	0	77.95	ELNALAEQVVQF			cleaved F-V@C-term	0.00421027	1359.71	680.861	1359.7	680.859	2	13	5.1.1.7931.4	108.453	1457.54	743.85	109.19	1.14	1559.61
1	26.07	26.07	36.69	tr|A0A287NA39	Uncharacterized protein OS=Hordeum vulgare subsp. vulgare OX=112509 PE=3 SV=1	0	77.95	ELNALAEQVVQF			cleaved F-V@C-term	0.00421027	1359.71	680.861	1359.7	680.859	2	12	5.1.1.7943.7	109.597	1457.54	1360.87	109.19	1.14	3771.24
1	26.07	26.07	36.69	tr|A0A287NA39	Uncharacterized protein OS=Hordeum vulgare subsp. vulgare OX=112509 PE=3 SV=1	0	77.95	ELNALAEQVVQF			cleaved F-V@C-term	0.00640729	1359.71	680.862	1359.7	680.859	2	12	5.1.1.7946.8	109.885	24.6744	24.6744			3596.24
1	26.07	26.07	36.69	tr|A0A287NA39	Uncharacterized protein OS=Hordeum vulgare subsp. vulgare OX=112509 PE=3 SV=1	0	77.16	ELNALAEQVVQF			cleaved F-V@C-term	0.00296701	1359.71	680.861	1359.7	680.859	2	13	7.1.1.5532.8	71.0347	2723.73	2718.93	71.09	1.14	8223.13
1	26.07	26.07	36.69	tr|A0A287NA39	Uncharacterized protein OS=Hordeum vulgare subsp. vulgare OX=112509 PE=3 SV=1	0	77.16	ELNALAEQVVQF			cleaved F-V@C-term	0.000647886	1359.7	680.859	1359.7	680.859	2	13	7.1.1.5543.10	72.086	2765.05	2416.73	72.04	0.85	7591.36
1	26.07	26.07	36.69	tr|A0A287NA39	Uncharacterized protein OS=Hordeum vulgare subsp. vulgare OX=112509 PE=3 SV=1	0	76.48	ELNALAEQVVQF			cleaved F-V@C-term	0.120639	1359.82	680.919	1359.7	680.859	2	13	3.1.1.2792.8	81.6184	986.78	853.93	81.2	4.85	4044.25
1	26.07	26.07	36.69	tr|A0A287NA39	Uncharacterized protein OS=Hordeum vulgare subsp. vulgare OX=112509 PE=3 SV=1	0	68.46	ELNALAEQVVQF			cleaved F-V@C-term	0.00552219	1359.71	680.862	1359.7	680.859	2	13	6.1.1.5749.8	70.2183	52.5012	52.5012			8823.65
1	26.07	26.07	36.69	tr|A0A287NA39	Uncharacterized protein OS=Hordeum vulgare subsp. vulgare OX=112509 PE=3 SV=1	0	68.46	ELNALAEQVVQF			cleaved F-V@C-term	0.00320302	1359.71	680.861	1359.7	680.859	2	13	6.1.1.5755.7	70.7824	53.1531	53.1531			8487.39
1	26.07	26.07	36.69	tr|A0A287NA39	Uncharacterized protein OS=Hordeum vulgare subsp. vulgare OX=112509 PE=3 SV=1	0	68.46	ELNALAEQVVQF			cleaved F-V@C-term	-0.0033883	1359.7	680.857	1359.7	680.859	2	13	6.1.1.5764.8	71.6393	40.7628	40.7628			8240.69
1	26.07	26.07	36.69	tr|A0A287NA39	Uncharacterized protein OS=Hordeum vulgare subsp. vulgare OX=112509 PE=3 SV=1	0	68.12	ELNALAEQVVQF			cleaved F-V@C-term	0.076572	1359.78	680.897	1359.7	680.859	2	16	8.1.1.5841.8	73.1888	3108.36	2652.98	72.39	1.52	9512.67
1	26.07	26.07	36.69	tr|A0A287NA39	Uncharacterized protein OS=Hordeum vulgare subsp. vulgare OX=112509 PE=3 SV=1	0	68.12	ELNALAEQVVQF			cleaved F-V@C-term	0.0749851	1359.78	680.896	1359.7	680.859	2	16	8.1.1.5854.9	74.4267	2623.26	2528.75	74.95	1.71	9505.92
1	26.07	26.07	36.69	tr|A0A287NA39	Uncharacterized protein OS=Hordeum vulgare subsp. vulgare OX=112509 PE=3 SV=1	0	68.12	ELNALAEQVVQF			cleaved F-V@C-term	0.0784031	1359.78	680.898	1359.7	680.859	2	14	8.1.1.5892.10	78.034	2413.05	1980.41	78.27	1.23	6898.33
1	26.07	26.07	36.69	tr|A0A287NA39	Uncharacterized protein OS=Hordeum vulgare subsp. vulgare OX=112509 PE=3 SV=1	0	68.12	ELNALAEQVVQF			cleaved F-V@C-term	0.0784031	1359.78	680.898	1359.7	680.859	2	14	8.1.1.5896.10	78.4138	2413.05	2164.31	78.27	1.23	7131.34
1	26.07	26.07	36.69	tr|A0A287NA39	Uncharacterized protein OS=Hordeum vulgare subsp. vulgare OX=112509 PE=3 SV=1	0	68.01	ELNALAEQVVQF			cleaved F-V@C-term	0.00421027	1359.71	680.861	1359.7	680.859	2	12	5.1.1.7932.3	108.532	1457.54	786.07	109.19	1.14	2176.19
1	26.07	26.07	36.69	tr|A0A287NA39	Uncharacterized protein OS=Hordeum vulgare subsp. vulgare OX=112509 PE=3 SV=1	0	68.01	ELNALAEQVVQF			cleaved F-V@C-term	0.00421027	1359.71	680.861	1359.7	680.859	2	13	5.1.1.7944.9	109.7	1457.54	1299.8	109.19	1.14	3624.24
1	26.07	26.07	36.69	tr|A0A287NA39	Uncharacterized protein OS=Hordeum vulgare subsp. vulgare OX=112509 PE=3 SV=1	0	68.01	ELNALAEQVVQF			cleaved F-V@C-term	0.00579701	1359.71	680.862	1359.7	680.859	2	12	5.1.1.7945.6	109.782	24.7544	24.7544			3574.24
1	26.07	26.07	36.69	tr|A0A287NA39	Uncharacterized protein OS=Hordeum vulgare subsp. vulgare OX=112509 PE=3 SV=1	0	67.7	ELNALAEQVVQF			cleaved F-V@C-term	0.0758396	1359.78	680.897	1359.7	680.859	2	12	7.1.1.5068.7	27.0867	219.27	211.95	27.04	0.66	828.589
1	26.07	26.07	36.69	tr|A0A287NA39	Uncharacterized protein OS=Hordeum vulgare subsp. vulgare OX=112509 PE=3 SV=1	0	59.59	ELNALAEQVVQF			cleaved F-V@C-term	0.122837	1359.83	680.92	1359.7	680.859	2	11	3.1.1.2778.11	80.3004	1113.16	854.77	76.92	4.85	4277.26
1	26.07	26.07	36.69	tr|A0A287NA39	Uncharacterized protein OS=Hordeum vulgare subsp. vulgare OX=112509 PE=3 SV=1	0	59.59	ELNALAEQVVQF			cleaved F-V@C-term	0.120639	1359.82	680.919	1359.7	680.859	2	12	3.1.1.2786.9	81.0525	986.78	958.21	81.2	4.85	3934.25
1	26.07	26.07	36.69	tr|A0A287NA39	Uncharacterized protein OS=Hordeum vulgare subsp. vulgare OX=112509 PE=3 SV=1	0	59.43	ELNALAEQVVQF			cleaved F-V@C-term	0.00250149	1359.71	680.86	1359.7	680.859	2	12	5.1.1.6754.9	85.8502	20.5226	20.5226			3943
1	26.07	26.07	36.69	tr|A0A287NA39	Uncharacterized protein OS=Hordeum vulgare subsp. vulgare OX=112509 PE=3 SV=1	0	59.43	ELNALAEQVVQF			cleaved F-V@C-term	0.00421027	1359.71	680.861	1359.7	680.859	2	11	5.1.1.7933.7	108.645	1457.54	895.17	109.19	1.14	3012.22
1	26.07	26.07	36.69	tr|A0A287NA39	Uncharacterized protein OS=Hordeum vulgare subsp. vulgare OX=112509 PE=3 SV=1	0	59.43	ELNALAEQVVQF			cleaved F-V@C-term	0.00421027	1359.71	680.861	1359.7	680.859	2	12	5.1.1.7935.3	108.82	1457.54	1248.37	109.19	1.14	3657.18
1	26.07	26.07	36.69	tr|A0A287NA39	Uncharacterized protein OS=Hordeum vulgare subsp. vulgare OX=112509 PE=3 SV=1	0	59.43	ELNALAEQVVQF			cleaved F-V@C-term	0.00421027	1359.71	680.861	1359.7	680.859	2	13	5.1.1.7937.6	109.024	1457.54	1430.23	109.19	1.14	5384.54
1	26.07	26.07	36.69	tr|A0A287NA39	Uncharacterized protein OS=Hordeum vulgare subsp. vulgare OX=112509 PE=3 SV=1	0	59.43	ELNALAEQVVQF			cleaved F-V@C-term	0.00421027	1359.71	680.861	1359.7	680.859	2	14	5.1.1.7939.6	109.214	1457.54	1455.39	109.19	1.14	6092.57
1	26.07	26.07	36.69	tr|A0A287NA39	Uncharacterized protein OS=Hordeum vulgare subsp. vulgare OX=112509 PE=3 SV=1	0	59.43	ELNALAEQVVQF			cleaved F-V@C-term	0.00421027	1359.71	680.861	1359.7	680.859	2	13	5.1.1.7941.8	109.412	1457.54	1440.05	109.19	1.14	4228.26
1	26.07	26.07	36.69	tr|A0A287NA39	Uncharacterized protein OS=Hordeum vulgare subsp. vulgare OX=112509 PE=3 SV=1	0	59.43	ELNALAEQVVQF			cleaved F-V@C-term	0.00421027	1359.71	680.861	1359.7	680.859	2	12	5.1.1.7942.7	109.502	1457.54	1416.99	109.19	1.14	3917.25
1	26.07	26.07	36.69	tr|A0A287NA39	Uncharacterized protein OS=Hordeum vulgare subsp. vulgare OX=112509 PE=3 SV=1	0	56.97	ELNALAEQVVQF			cleaved F-V@C-term	0.076572	1359.78	680.897	1359.7	680.859	2	15	8.1.1.5830.10	72.1535	3108.36	2994.43	72.39	1.52	9404.16
1	26.07	26.07	36.69	tr|A0A287NA39	Uncharacterized protein OS=Hordeum vulgare subsp. vulgare OX=112509 PE=3 SV=1	0	56.97	ELNALAEQVVQF			cleaved F-V@C-term	0.076572	1359.78	680.897	1359.7	680.859	2	15	8.1.1.5840.9	73.0981	3108.36	2638.12	72.39	1.52	9344.16
1	26.07	26.07	36.69	tr|A0A287NA39	Uncharacterized protein OS=Hordeum vulgare subsp. vulgare OX=112509 PE=3 SV=1	0	56.97	ELNALAEQVVQF			cleaved F-V@C-term	0.076572	1359.78	680.897	1359.7	680.859	2	15	8.1.1.5843.9	73.383	3108.36	2618.41	72.39	1.52	9670.49
1	26.07	26.07	36.69	tr|A0A287NA39	Uncharacterized protein OS=Hordeum vulgare subsp. vulgare OX=112509 PE=3 SV=1	0	56.97	ELNALAEQVVQF			cleaved F-V@C-term	0.0771824	1359.78	680.898	1359.7	680.859	2	15	8.1.1.5852.9	74.2369	3108.36	2572.03	72.3	2.28	8552.14
1	26.07	26.07	36.69	tr|A0A287NA39	Uncharacterized protein OS=Hordeum vulgare subsp. vulgare OX=112509 PE=3 SV=1	0	56.97	ELNALAEQVVQF			cleaved F-V@C-term	0.0754734	1359.78	680.897	1359.7	680.859	2	14	8.1.1.5882.9	77.081	2578.69	2103.87	76.38	1.04	7592.86
1	26.07	26.07	36.69	tr|A0A287NA39	Uncharacterized protein OS=Hordeum vulgare subsp. vulgare OX=112509 PE=3 SV=1	0	56.97	ELNALAEQVVQF			cleaved F-V@C-term	0.0784031	1359.78	680.898	1359.7	680.859	2	14	8.1.1.5889.12	77.7576	2413.05	2150.45	78.27	1.23	6854.59
1	26.07	26.07	36.69	tr|A0A287NA39	Uncharacterized protein OS=Hordeum vulgare subsp. vulgare OX=112509 PE=3 SV=1	0	56.97	ELNALAEQVVQF			cleaved F-V@C-term	0.0784031	1359.78	680.898	1359.7	680.859	2	14	8.1.1.5891.13	77.9514	2413.05	1955.6	78.27	1.23	6885.28
1	26.07	26.07	36.69	tr|A0A287NA39	Uncharacterized protein OS=Hordeum vulgare subsp. vulgare OX=112509 PE=3 SV=1	0	56.97	ELNALAEQVVQF			cleaved F-V@C-term	0.0762058	1359.78	680.897	1359.7	680.859	2	13	8.1.1.5906.10	79.3624	2141.87	1735.11	78.85	1.04	6221.07
1	26.07	26.07	36.69	tr|A0A287NA39	Uncharacterized protein OS=Hordeum vulgare subsp. vulgare OX=112509 PE=3 SV=1	0	56.87	ELNALAEQVVQF			cleaved F-V@C-term	0.120639	1359.82	680.919	1359.7	680.859	2	10	3.1.1.2823.13	84.5861	986.78	702.9	81.2	4.85	3469.23
1	26.07	26.07	36.69	tr|A0A287NA39	Uncharacterized protein OS=Hordeum vulgare subsp. vulgare OX=112509 PE=3 SV=1	0	56.18	ELNALAEQVVQF			cleaved F-V@C-term	0.0774265	1359.78	680.898	1359.7	680.859	2	17	8.1.1.5699.4	59.7308	10788.4	5825.68	58.58	2.08	16078.4
1	26.07	26.07	36.69	tr|A0A287NA39	Uncharacterized protein OS=Hordeum vulgare subsp. vulgare OX=112509 PE=3 SV=1	0	52.33	ELNALAEQVVQF			cleaved F-V@C-term	0.00494261	1359.71	680.861	1359.7	680.859	2	11	5.1.1.6753.11	85.7635	21.6741	21.6741			3902.68
1	26.07	26.07	36.69	tr|A0A287NA39	Uncharacterized protein OS=Hordeum vulgare subsp. vulgare OX=112509 PE=3 SV=1	0	52.33	ELNALAEQVVQF			cleaved F-V@C-term	0.00421027	1359.71	680.861	1359.7	680.859	2	12	5.1.1.7936.4	108.92	1457.54	1412.79	109.19	1.14	3840.31
1	26.07	26.07	36.69	tr|A0A287NA39	Uncharacterized protein OS=Hordeum vulgare subsp. vulgare OX=112509 PE=3 SV=1	0	52.33	ELNALAEQVVQF			cleaved F-V@C-term	0.00421027	1359.71	680.861	1359.7	680.859	2	12	5.1.1.7940.8	109.317	1457.54	1447.39	109.19	1.14	5332.29
1	26.07	26.07	36.69	tr|A0A287NA39	Uncharacterized protein OS=Hordeum vulgare subsp. vulgare OX=112509 PE=3 SV=1	0	51.86	ELNALAEQVVQF			cleaved F-V@C-term	0.0041876	1359.71	680.861	1359.7	680.859	2	12	7.1.1.5610.10	78.442	1937.62	1805.72	78.87	1.71	5798.3
1	26.07	26.07	36.69	tr|A0A287NA39	Uncharacterized protein OS=Hordeum vulgare subsp. vulgare OX=112509 PE=3 SV=1	0	47.35	ELNALAEQVVQF			cleaved F-V@C-term	0.00639649	1359.71	680.862	1359.7	680.859	2	13	5.1.1.6586.7	69.8988	66.4381	66.4381			8178.38
1	26.07	26.07	36.69	tr|A0A287NA39	Uncharacterized protein OS=Hordeum vulgare subsp. vulgare OX=112509 PE=3 SV=1	0	47.35	ELNALAEQVVQF			cleaved F-V@C-term	0.00358909	1359.71	680.861	1359.7	680.859	2	14	5.1.1.6606.6	71.7896	2548.83	2277.27	70.72	2.56	8123
1	26.07	26.07	36.69	tr|A0A287NA39	Uncharacterized protein OS=Hordeum vulgare subsp. vulgare OX=112509 PE=3 SV=1	0	46.57	ELNALAEQVVQF			cleaved F-V@C-term	-0.000458823	1359.7	680.859	1359.7	680.859	2	14	6.1.1.5725.9	67.9499	51.374	51.374			8673.64
1	26.07	26.07	36.69	tr|A0A287NA39	Uncharacterized protein OS=Hordeum vulgare subsp. vulgare OX=112509 PE=3 SV=1	0	46.57	ELNALAEQVVQF			cleaved F-V@C-term	0.00198241	1359.71	680.86	1359.7	680.859	2	13	6.1.1.5726.9	68.0445	55.4044	55.4044			8499.89
1	26.07	26.07	36.69	tr|A0A287NA39	Uncharacterized protein OS=Hordeum vulgare subsp. vulgare OX=112509 PE=3 SV=1	0	46.57	ELNALAEQVVQF			cleaved F-V@C-term	-0.000458823	1359.7	680.859	1359.7	680.859	2	13	6.1.1.5727.8	68.1355	50.1977	50.1977			8180.63
1	26.07	26.07	36.69	tr|A0A287NA39	Uncharacterized protein OS=Hordeum vulgare subsp. vulgare OX=112509 PE=3 SV=1	0	46.57	ELNALAEQVVQF			cleaved F-V@C-term	0.00173829	1359.71	680.86	1359.7	680.859	2	13	6.1.1.5730.6	68.4114	56.6227	56.6227			9144.16
1	26.07	26.07	36.69	tr|A0A287NA39	Uncharacterized protein OS=Hordeum vulgare subsp. vulgare OX=112509 PE=3 SV=1	0	46.57	ELNALAEQVVQF			cleaved F-V@C-term	-0.00924726	1359.69	680.854	1359.7	680.859	2	13	6.1.1.5736.7	68.9828	59.6605	59.6605			9442.17
1	26.07	26.07	36.69	tr|A0A287NA39	Uncharacterized protein OS=Hordeum vulgare subsp. vulgare OX=112509 PE=3 SV=1	0	46.57	ELNALAEQVVQF			cleaved F-V@C-term	0.00283684	1359.71	680.86	1359.7	680.859	2	12	6.1.1.5737.6	69.0733	55.4267	55.4267			9333.35
1	26.07	26.07	36.69	tr|A0A287NA39	Uncharacterized protein OS=Hordeum vulgare subsp. vulgare OX=112509 PE=3 SV=1	0	46.57	ELNALAEQVVQF			cleaved F-V@C-term	-0.0033883	1359.7	680.857	1359.7	680.859	2	14	6.1.1.5739.8	69.271	58.7208	58.7208			9050.4
1	26.07	26.07	36.69	tr|A0A287NA39	Uncharacterized protein OS=Hordeum vulgare subsp. vulgare OX=112509 PE=3 SV=1	0	46.57	ELNALAEQVVQF			cleaved F-V@C-term	0.00601044	1359.71	680.862	1359.7	680.859	2	12	6.1.1.5744.8	69.7443	45.2505	45.2505			8547.14
1	26.07	26.07	36.69	tr|A0A287NA39	Uncharacterized protein OS=Hordeum vulgare subsp. vulgare OX=112509 PE=3 SV=1	0	46.57	ELNALAEQVVQF			cleaved F-V@C-term	0.00100592	1359.7	680.86	1359.7	680.859	2	13	6.1.1.5761.8	71.355	42.5491	42.5491			8079.62
1	26.07	26.07	36.69	tr|A0A287NA39	Uncharacterized protein OS=Hordeum vulgare subsp. vulgare OX=112509 PE=3 SV=1	0	46.51	ELNALAEQVVQF			cleaved F-V@C-term	0.0133645	1359.72	680.866	1359.7	680.859	2	11	5.1.1.6755.10	85.9492	21.5046	21.5046			3852.24
1	26.07	26.07	36.69	tr|A0A287NA39	Uncharacterized protein OS=Hordeum vulgare subsp. vulgare OX=112509 PE=3 SV=1	0	46.51	ELNALAEQVVQF			cleaved F-V@C-term	-0.00128226	1359.7	680.858	1359.7	680.859	2	11	5.1.1.6825.3	92.557	275.89	245.77	92.64	1.6	1933.62
1	26.07	26.07	36.69	tr|A0A287NA39	Uncharacterized protein OS=Hordeum vulgare subsp. vulgare OX=112509 PE=3 SV=1	0	46.51	ELNALAEQVVQF			cleaved F-V@C-term	0.00421027	1359.71	680.861	1359.7	680.859	2	11	5.1.1.7934.5	108.733	1457.54	1072.68	109.19	1.14	3669.24
1	26.07	26.07	36.69	tr|A0A287NA39	Uncharacterized protein OS=Hordeum vulgare subsp. vulgare OX=112509 PE=3 SV=1	0	46.51	ELNALAEQVVQF			cleaved F-V@C-term	0.00421027	1359.71	680.861	1359.7	680.859	2	12	5.1.1.7938.8	109.128	1457.54	1447.63	109.19	1.14	6178.31
1	26.07	26.07	36.69	tr|A0A287NA39	Uncharacterized protein OS=Hordeum vulgare subsp. vulgare OX=112509 PE=3 SV=1	0	44.98	ELNALAEQVVQF			cleaved F-V@C-term	0.076572	1359.78	680.897	1359.7	680.859	2	15	8.1.1.5838.9	72.9085	3108.36	2893.04	72.39	1.52	9185.66
1	26.07	26.07	36.69	tr|A0A287NA39	Uncharacterized protein OS=Hordeum vulgare subsp. vulgare OX=112509 PE=3 SV=1	0	44.98	ELNALAEQVVQF			cleaved F-V@C-term	0.076572	1359.78	680.897	1359.7	680.859	2	15	8.1.1.5839.10	73.0074	3108.36	2727.28	72.39	1.52	8843.4
1	26.07	26.07	36.69	tr|A0A287NA39	Uncharacterized protein OS=Hordeum vulgare subsp. vulgare OX=112509 PE=3 SV=1	0	44.98	ELNALAEQVVQF			cleaved F-V@C-term	0.0771824	1359.78	680.898	1359.7	680.859	2	14	8.1.1.5847.12	73.775	3108.36	2645.86	72.3	2.28	9029.4
1	26.07	26.07	36.69	tr|A0A287NA39	Uncharacterized protein OS=Hordeum vulgare subsp. vulgare OX=112509 PE=3 SV=1	0	44.98	ELNALAEQVVQF			cleaved F-V@C-term	0.0749851	1359.78	680.896	1359.7	680.859	2	16	8.1.1.5858.9	74.8055	2623.26	2340.43	74.95	1.71	7943.12
1	26.07	26.07	36.69	tr|A0A287NA39	Uncharacterized protein OS=Hordeum vulgare subsp. vulgare OX=112509 PE=3 SV=1	0	44.98	ELNALAEQVVQF			cleaved F-V@C-term	0.0762058	1359.78	680.897	1359.7	680.859	2	13	8.1.1.5907.10	79.4572	2141.87	1672.05	78.85	1.04	6165.63
1	26.07	26.07	36.69	tr|A0A287NA39	Uncharacterized protein OS=Hordeum vulgare subsp. vulgare OX=112509 PE=3 SV=1	0	44.69	ELNALAEQVVQF			cleaved F-V@C-term	0.00261261	1359.71	680.86	1359.7	680.859	2	14	5.1.1.6587.7	69.9933	60.5152	60.5152			8107.31
1	26.07	26.07	36.69	tr|A0A287NA39	Uncharacterized protein OS=Hordeum vulgare subsp. vulgare OX=112509 PE=3 SV=1	0	43.4	ELNALAEQVVQF			cleaved F-V@C-term	0.00358909	1359.71	680.861	1359.7	680.859	2	13	5.1.1.6597.6	70.9369	2548.83	2451.53	70.72	2.56	7982.62
1	26.07	26.07	36.69	tr|A0A287NA39	Uncharacterized protein OS=Hordeum vulgare subsp. vulgare OX=112509 PE=3 SV=1	0	41.74	ELNALAEQVVQF			cleaved F-V@C-term	0.00933664	1359.71	680.864	1359.7	680.859	2	10	5.1.1.6756.9	86.0401	21.2732	21.2732			3897.24
1	26.07	26.07	36.69	tr|A0A287NA39	Uncharacterized protein OS=Hordeum vulgare subsp. vulgare OX=112509 PE=3 SV=1	0	41.74	ELNALAEQVVQF			cleaved F-V@C-term	-0.00128226	1359.7	680.858	1359.7	680.859	2	13	5.1.1.6826.4	92.6679	275.89	258.44	92.64	1.6	1628.33
1	26.07	26.07	36.69	tr|A0A287NA39	Uncharacterized protein OS=Hordeum vulgare subsp. vulgare OX=112509 PE=3 SV=1	0	41.74	ELNALAEQVVQF			cleaved F-V@C-term	-0.00128226	1359.7	680.858	1359.7	680.859	2	13	5.1.1.6827.3	92.7496	275.89	264.3	92.64	1.6	1489.62
1	26.07	26.07	36.69	tr|A0A287NA39	Uncharacterized protein OS=Hordeum vulgare subsp. vulgare OX=112509 PE=3 SV=1	0	40.91	ELNALAEQVVQF			cleaved F-V@C-term	0.00358909	1359.71	680.861	1359.7	680.859	2	12	5.1.1.6608.9	71.9915	2548.83	2300.1	70.72	2.56	8144.12
1	26.07	26.07	36.69	tr|A0A287NA39	Uncharacterized protein OS=Hordeum vulgare subsp. vulgare OX=112509 PE=3 SV=1	0	39.7	ELNALAEQVVQF			cleaved F-V@C-term	0.00358909	1359.71	680.861	1359.7	680.859	2	13	5.1.1.6601.6	71.3159	2548.83	2313.13	70.72	2.56	8944.4
1	26.07	26.07	36.69	tr|A0A287NA39	Uncharacterized protein OS=Hordeum vulgare subsp. vulgare OX=112509 PE=3 SV=1	0	39.7	ELNALAEQVVQF			cleaved F-V@C-term	0.00358909	1359.71	680.861	1359.7	680.859	2	13	5.1.1.6603.8	71.5138	2548.83	2216.25	70.72	2.56	8785.15
1	26.07	26.07	36.69	tr|A0A287NA39	Uncharacterized protein OS=Hordeum vulgare subsp. vulgare OX=112509 PE=3 SV=1	0	39.7	ELNALAEQVVQF			cleaved F-V@C-term	0.00358909	1359.71	680.861	1359.7	680.859	2	12	5.1.1.6605.9	71.7075	2548.83	2243.17	70.72	2.56	7804.86
1	26.07	26.07	36.69	tr|A0A287NA39	Uncharacterized protein OS=Hordeum vulgare subsp. vulgare OX=112509 PE=3 SV=1	0	37.37	ELNALAEQVVQF	Deamidated(Q)@11		cleaved F-V@C-term	0.0164442	1360.7	681.359	1360.69	681.351	2	12	5.1.1.6656.11	76.5552	1162.12	1065.62	76.98	2.28	6644.82
1	26.07	26.07	36.69	tr|A0A287NA39	Uncharacterized protein OS=Hordeum vulgare subsp. vulgare OX=112509 PE=3 SV=1	0	34.57	ELNALAEQVVQF	Deamidated(Q)@8; Deamidated(Q)@11		cleaved F-V@C-term	0.0259406	1361.7	681.856	1361.67	681.843	2	12	5.1.1.6775.10	87.8504	320.67	255.04	86.94	2.28	4161.5
1	26.07	26.07	36.69	tr|A0A287NA39	Uncharacterized protein OS=Hordeum vulgare subsp. vulgare OX=112509 PE=3 SV=1	0	34.08	ELNALAEQVVQF			cleaved F-V@C-term	0.123447	1359.83	680.921	1359.7	680.859	2	10	3.1.1.2869.13	88.9617	914.08	875.7	88.62	2.85	3657.24
1	26.07	26.07	36.69	tr|A0A287NA39	Uncharacterized protein OS=Hordeum vulgare subsp. vulgare OX=112509 PE=3 SV=1	0	33.42	ELNALAEQVVQF			cleaved F-V@C-term	0.0755955	1359.78	680.897	1359.7	680.859	2	16	8.1.1.5822.9	71.3903	3422.92	3017.61	70.97	0.76	9829.37
1	26.07	26.07	36.69	tr|A0A287NA39	Uncharacterized protein OS=Hordeum vulgare subsp. vulgare OX=112509 PE=3 SV=1	0	27.78	ELNALAEQVVQF			cleaved F-V@C-term	0.120639	1359.82	680.919	1359.7	680.859	2	10	3.1.1.2811.12	83.4406	986.78	848.07	81.2	4.85	3698.24
1	26.07	26.07	36.69	tr|A0A287NA39	Uncharacterized protein OS=Hordeum vulgare subsp. vulgare OX=112509 PE=3 SV=1	0	27.63	ELNALAEQVVQF			cleaved F-V@C-term	0.00811607	1359.71	680.863	1359.7	680.859	2	8	5.1.1.6817.7	91.8122	41.4882	41.4882			2691.27
1	26.07	26.07	36.69	tr|A0A287NA39	Uncharacterized protein OS=Hordeum vulgare subsp. vulgare OX=112509 PE=3 SV=1	0	26.94	ELNALAEQVVQF			cleaved F-V@C-term	0.0787693	1359.78	680.898	1359.7	680.859	2	17	7.1.1.5393.10	57.8885	6041.63	4931.93	58.79	1.8	14258.6
1	26.07	26.07	36.69	tr|A0A287NA39	Uncharacterized protein OS=Hordeum vulgare subsp. vulgare OX=112509 PE=3 SV=1	0	26.02	ELNALAEQVVQF			cleaved F-V@C-term	0.0787693	1359.78	680.898	1359.7	680.859	2	15	7.1.1.5403.5	58.8162	6041.63	5941.78	58.79	1.8	15382.1
1	26.07	26.07	36.69	tr|A0A287NA39	Uncharacterized protein OS=Hordeum vulgare subsp. vulgare OX=112509 PE=3 SV=1	0	25.72	ELNALAEQVVQF			cleaved F-V@C-term	0.0754734	1359.78	680.897	1359.7	680.859	2	18	5.1.1.6485.8	60.3376	7941.79	7603.65	59.36	2.28	19870.7
1	26.07	26.07	36.69	tr|A0A287NA39	Uncharacterized protein OS=Hordeum vulgare subsp. vulgare OX=112509 PE=3 SV=1	0	24.46	ELNALAEQVVQF			cleaved F-V@C-term	-0.00424273	1359.7	680.857	1359.7	680.859	2	13	6.1.1.5734.6	68.7894	61.8103	61.8103			8954.4
1	26.07	26.07	36.69	tr|A0A287NA39	Uncharacterized protein OS=Hordeum vulgare subsp. vulgare OX=112509 PE=3 SV=1	0	24.36	ELNALAEQVVQF			cleaved F-V@C-term	0.0774265	1359.78	680.898	1359.7	680.859	2	18	7.1.1.5366.5	55.3092	8663.14	8633.79	55.85	1.42	21640.4
1	26.07	26.07	36.69	tr|A0A287NA39	Uncharacterized protein OS=Hordeum vulgare subsp. vulgare OX=112509 PE=3 SV=1	0	23.61	ELNALAEQVVQF			cleaved F-V@C-term	0.0787693	1359.78	680.898	1359.7	680.859	2	15	7.1.1.5394.8	57.975	6041.63	5185.2	58.79	1.8	14428.1
1	26.07	26.07	36.69	tr|A0A287NA39	Uncharacterized protein OS=Hordeum vulgare subsp. vulgare OX=112509 PE=3 SV=1	0	23.41	ELNALAEQVVQF			cleaved F-V@C-term	0.0762058	1359.78	680.897	1359.7	680.859	2	13	8.1.1.5898.10	78.6036	2141.87	1996.36	78.85	1.04	6599.33
1	26.07	26.07	36.69	tr|A0A287NA39	Uncharacterized protein OS=Hordeum vulgare subsp. vulgare OX=112509 PE=3 SV=1	0	22.85	ELNALAEQVVQF			cleaved F-V@C-term	0.120639	1359.82	680.919	1359.7	680.859	2	11	3.1.1.2798.12	82.2052	986.78	846.39	81.2	4.85	3845.24
1	26.07	26.07	36.69	tr|A0A287NA39	Uncharacterized protein OS=Hordeum vulgare subsp. vulgare OX=112509 PE=3 SV=1	0	22.85	ELNALAEQVVQF			cleaved F-V@C-term	0.120639	1359.82	680.919	1359.7	680.859	2	9	3.1.1.2808.14	83.1641	986.78	883.78	81.2	4.85	3759.24
1	26.07	26.07	36.69	tr|A0A287NA39	Uncharacterized protein OS=Hordeum vulgare subsp. vulgare OX=112509 PE=3 SV=1	0	22.85	ELNALAEQVVQF			cleaved F-V@C-term	0.119663	1359.82	680.919	1359.7	680.859	2	10	3.1.1.3500.6	105.568	1269.29	644.57	108.02	3.71	2365.2
1	26.07	26.07	36.69	tr|A0A287NA39	Uncharacterized protein OS=Hordeum vulgare subsp. vulgare OX=112509 PE=3 SV=1	0	20.52	ELNALAEQVVQF			cleaved F-V@C-term	0.0787693	1359.78	680.898	1359.7	680.859	2	15	7.1.1.5410.5	59.4797	6041.63	4275.83	58.79	1.8	15769.6
1	26.07	26.07	36.69	tr|A0A287NA39	Uncharacterized protein OS=Hordeum vulgare subsp. vulgare OX=112509 PE=3 SV=1	0	20.34	ELNALAEQVVQF			cleaved F-V@C-term	3.75908e-05	1359.7	680.859	1359.7	680.859	2	13	7.1.1.5494.7	67.4292	3146.85	3123.25	67.49	1.51	8854.14
1	26.07	26.07	36.69	tr|A0A287NA39	Uncharacterized protein OS=Hordeum vulgare subsp. vulgare OX=112509 PE=3 SV=1	0	20.34	ELNALAEQVVQF			cleaved F-V@C-term	3.75908e-05	1359.7	680.859	1359.7	680.859	2	14	7.1.1.5495.9	67.5327	3146.85	3054.87	67.49	1.51	8771.15
1	26.07	26.07	36.69	tr|A0A287NA39	Uncharacterized protein OS=Hordeum vulgare subsp. vulgare OX=112509 PE=3 SV=1	0	20.34	ELNALAEQVVQF			cleaved F-V@C-term	0.00101406	1359.7	680.86	1359.7	680.859	2	14	7.1.1.5505.7	68.4715	2825.48	2484.06	69.1	0.95	8672.89
1	26.07	26.07	36.69	tr|A0A287NA39	Uncharacterized protein OS=Hordeum vulgare subsp. vulgare OX=112509 PE=3 SV=1	0	20.34	ELNALAEQVVQF			cleaved F-V@C-term	0.00296701	1359.71	680.861	1359.7	680.859	2	14	7.1.1.5529.9	70.7545	2723.73	2304.71	71.09	1.14	7711.36
1	26.07	26.07	36.69	tr|A0A287NA39	Uncharacterized protein OS=Hordeum vulgare subsp. vulgare OX=112509 PE=3 SV=1	0	20.34	ELNALAEQVVQF			cleaved F-V@C-term	0.00296701	1359.71	680.861	1359.7	680.859	2	13	7.1.1.5534.9	71.2283	2711.52	2529.68	71.09	0.85	8427.13
1	26.07	26.07	36.69	tr|A0A287NA39	Uncharacterized protein OS=Hordeum vulgare subsp. vulgare OX=112509 PE=3 SV=1	0	20.34	ELNALAEQVVQF			cleaved F-V@C-term	0.000647886	1359.7	680.859	1359.7	680.859	2	13	7.1.1.5544.9	72.1767	2765.05	2266.82	72.04	0.85	7430.1
1	26.07	26.07	36.69	tr|A0A287NA39	Uncharacterized protein OS=Hordeum vulgare subsp. vulgare OX=112509 PE=3 SV=1	0	20.34	ELNALAEQVVQF			cleaved F-V@C-term	-0.000206527	1359.7	680.859	1359.7	680.859	2	12	7.1.1.5552.9	72.9357	2569.75	2290.62	72.61	1.14	7811.36
1	26.07	26.07	36.69	tr|A0A287NA39	Uncharacterized protein OS=Hordeum vulgare subsp. vulgare OX=112509 PE=3 SV=1	0	20.34	ELNALAEQVVQF			cleaved F-V@C-term	0.00015965	1359.7	680.859	1359.7	680.859	2	13	7.1.1.5569.10	74.5527	2430.75	2019.02	74.23	0.85	6330.57
1	26.07	26.07	36.69	tr|A0A287NA39	Uncharacterized protein OS=Hordeum vulgare subsp. vulgare OX=112509 PE=3 SV=1	0	20.34	ELNALAEQVVQF			cleaved F-V@C-term	0.00382142	1359.71	680.861	1359.7	680.859	2	11	7.1.1.5587.12	76.2677	2038.38	1824.77	76.79	1.71	6277.44
1	26.07	26.07	36.69	tr|A0A287NA39	Uncharacterized protein OS=Hordeum vulgare subsp. vulgare OX=112509 PE=3 SV=1	0	20.34	ELNALAEQVVQF			cleaved F-V@C-term	0.00382142	1359.71	680.861	1359.7	680.859	2	11	7.1.1.5589.10	76.4491	2038.38	1921.8	76.79	1.71	6431.07
1	26.07	26.07	36.69	tr|A0A287NA39	Uncharacterized protein OS=Hordeum vulgare subsp. vulgare OX=112509 PE=3 SV=1	0	20.34	ELNALAEQVVQF			cleaved F-V@C-term	0.00382142	1359.71	680.861	1359.7	680.859	2	12	7.1.1.5601.12	77.596	2038.38	1884.62	76.79	1.71	5932.31
1	26.07	26.07	36.69	tr|A0A287NA39	Uncharacterized protein OS=Hordeum vulgare subsp. vulgare OX=112509 PE=3 SV=1	0	20.34	ELNALAEQVVQF			cleaved F-V@C-term	0.00382142	1359.71	680.861	1359.7	680.859	2	11	7.1.1.5604.9	77.8684	2038.38	1968.28	76.79	1.71	6146.81
1	26.07	26.07	36.69	tr|A0A287NA39	Uncharacterized protein OS=Hordeum vulgare subsp. vulgare OX=112509 PE=3 SV=1	0	20.13	ELNALAEQVVQF			cleaved F-V@C-term	0.123447	1359.83	680.921	1359.7	680.859	2	9	3.1.1.2887.9	90.6538	914.08	656.89	88.62	2.85	3034.22
1	26.07	26.07	36.69	tr|A0A287NA39	Uncharacterized protein OS=Hordeum vulgare subsp. vulgare OX=112509 PE=3 SV=1	0	17.04	ELNALAEQVVQF	Deamidated(Q)@8; Deamidated(Q)@11		cleaved F-V@C-term	0.0071439	1361.68	681.847	1361.67	681.843	2	11	5.1.1.6796.11	89.848	248.11	242.11	90.08	1.42	4293.2
1	26.07	26.07	36.69	tr|A0A287NA39	Uncharacterized protein OS=Hordeum vulgare subsp. vulgare OX=112509 PE=3 SV=1	0	16.19	ELNALAEQVVQF			cleaved F-V@C-term	0.127231	1359.83	680.923	1359.7	680.859	2	12	4.1.1.2844.11	78.613	1457.8	1089.22	77.23	3.14	4797.46
1	26.07	26.07	36.69	tr|A0A287NA39	Uncharacterized protein OS=Hordeum vulgare subsp. vulgare OX=112509 PE=3 SV=1	0	16.19	ELNALAEQVVQF			cleaved F-V@C-term	0.076572	1359.78	680.897	1359.7	680.859	2	18	7.1.1.5338.5	52.6552	12882.9	10734.1	52.06	1.04	25467.7
1	26.07	26.07	36.69	tr|A0A287NA39	Uncharacterized protein OS=Hordeum vulgare subsp. vulgare OX=112509 PE=3 SV=1	0	16.19	ELNALAEQVVQF			cleaved F-V@C-term	0.0774265	1359.78	680.898	1359.7	680.859	2	17	7.1.1.5367.4	55.3997	8663.14	8500.65	55.85	1.42	21404.8
1	26.07	26.07	36.69	tr|A0A287NA39	Uncharacterized protein OS=Hordeum vulgare subsp. vulgare OX=112509 PE=3 SV=1	0	15.91	ELNALAEQVVQF			cleaved F-V@C-term	0.0787693	1359.78	680.898	1359.7	680.859	2	15	7.1.1.5409.5	59.3848	6041.63	3864.58	58.79	1.8	15001.3
1	26.07	26.07	36.69	tr|A0A287NA39	Uncharacterized protein OS=Hordeum vulgare subsp. vulgare OX=112509 PE=3 SV=1	0	15.77	ELNALAEQVVQF			cleaved F-V@C-term	0.123447	1359.83	680.921	1359.7	680.859	2	10	3.1.1.2876.13	89.6272	914.08	898.89	88.62	2.85	3779.24
1	26.07	26.07	36.69	tr|A0A287NA39	Uncharacterized protein OS=Hordeum vulgare subsp. vulgare OX=112509 PE=3 SV=1	0	15.64	ELNALAEQVVQF			cleaved F-V@C-term	0.0774265	1359.78	680.898	1359.7	680.859	2	18	7.1.1.5316.8	50.5789	40170.7	13888.3	49.31	1.42	26135
1	26.07	26.07	36.69	tr|A0A287NA39	Uncharacterized protein OS=Hordeum vulgare subsp. vulgare OX=112509 PE=3 SV=1	0	15.49	ELNALAEQVVQF			cleaved F-V@C-term	0.0784031	1359.78	680.898	1359.7	680.859	2	14	8.1.1.5888.10	77.6544	2413.05	2074.87	78.27	1.23	6903.15
1	26.07	26.07	36.69	tr|A0A287NA39	Uncharacterized protein OS=Hordeum vulgare subsp. vulgare OX=112509 PE=3 SV=1	0	15.4	ELNALAEQVVQF	Deamidated(Q)@8; Deamidated(Q)@11		cleaved F-V@C-term	0.0259406	1361.7	681.856	1361.67	681.843	2	11	5.1.1.6785.8	88.792	320.67	157.94	86.94	2.28	4544.02
1	26.07	26.07	36.69	tr|A0A287NA39	Uncharacterized protein OS=Hordeum vulgare subsp. vulgare OX=112509 PE=3 SV=1	0	99	ELNALAEQVVQFVLANESSTGGPR				0.00375322	2528.29	843.771	2528.29	843.77	3	27	5.1.1.6571.18	68.5238	2610.73	2584.67	68.46	0.57	15483.1
1	26.07	26.07	36.69	tr|A0A287NA39	Uncharacterized protein OS=Hordeum vulgare subsp. vulgare OX=112509 PE=3 SV=1	0	99	ELNALAEQVVQFVLANESSTGGPR				0.00375322	2528.29	843.771	2528.29	843.77	3	23	5.1.1.6573.18	68.7132	2610.73	2520.58	68.46	0.57	9441.35
1	26.07	26.07	36.69	tr|A0A287NA39	Uncharacterized protein OS=Hordeum vulgare subsp. vulgare OX=112509 PE=3 SV=1	0	99	ELNALAEQVVQFVLANESSTGGPR				-0.00497943	2528.28	843.768	2528.29	843.77	3	25	7.1.1.5486.17	66.7142	11485	8917.41	66.83	0.38	25312.6
1	26.07	26.07	36.69	tr|A0A287NA39	Uncharacterized protein OS=Hordeum vulgare subsp. vulgare OX=112509 PE=3 SV=1	0	99	ELNALAEQVVQFVLANESSTGGPR				-0.00497943	2528.28	843.768	2528.29	843.77	3	27	7.1.1.5487.15	66.8005	11485	10991.7	66.83	0.38	31262.1
1	26.07	26.07	36.69	tr|A0A287NA39	Uncharacterized protein OS=Hordeum vulgare subsp. vulgare OX=112509 PE=3 SV=1	0	99	ELNALAEQVVQFVLANESSTGGPR				-0.00497943	2528.28	843.768	2528.29	843.77	3	26	7.1.1.5488.18	66.9076	11485	10603.7	66.83	0.38	27615
1	26.07	26.07	36.69	tr|A0A287NA39	Uncharacterized protein OS=Hordeum vulgare subsp. vulgare OX=112509 PE=3 SV=1	0	99	ELNALAEQVVQFVLANESSTGGPR				0.00338615	2528.29	633.08	2528.29	633.079	4	21	7.1.1.5489.8	66.9603	2828.95	2304.57	66.84	0.28	8053.62
1	26.07	26.07	36.69	tr|A0A287NA39	Uncharacterized protein OS=Hordeum vulgare subsp. vulgare OX=112509 PE=3 SV=1	0	99	ELNALAEQVVQFVLANESSTGGPR				-0.00497943	2528.28	843.768	2528.29	843.77	3	26	7.1.1.5489.19	67.0061	11485	7739.41	66.83	0.38	19605.5
1	26.07	26.07	36.69	tr|A0A287NA39	Uncharacterized protein OS=Hordeum vulgare subsp. vulgare OX=112509 PE=3 SV=1	0	99	ELNALAEQVVQFVLANESSTGGPR				0.00338615	2528.29	633.08	2528.29	633.079	4	20	7.1.1.5490.8	67.0549	2828.95	1451.49	66.84	0.28	6306.82
1	26.07	26.07	36.69	tr|A0A287NA39	Uncharacterized protein OS=Hordeum vulgare subsp. vulgare OX=112509 PE=3 SV=1	0	99	ELNALAEQVVQFVLANESSTGGPR				-0.00497943	2528.28	843.768	2528.29	843.77	3	25	7.1.1.5490.17	67.0924	11485	5215.99	66.83	0.38	14286.3
1	26.07	26.07	36.69	tr|A0A287NA39	Uncharacterized protein OS=Hordeum vulgare subsp. vulgare OX=112509 PE=3 SV=1	0	99	ELNALAEQVVQFVLANESSTGGPR				-0.00497943	2528.28	843.768	2528.29	843.77	3	25	7.1.1.5491.18	67.1911	11485	3174.65	66.83	0.38	10457.7
1	26.07	26.07	36.69	tr|A0A287NA39	Uncharacterized protein OS=Hordeum vulgare subsp. vulgare OX=112509 PE=3 SV=1	0	99	ELNALAEQVVQFVLANESSTGGPR				0.00650626	2528.29	843.772	2528.29	843.77	3	24	6.1.1.5713.17	66.8473	2925.02	2901.79	67.01	0.85	15829.4
1	26.07	26.07	36.69	tr|A0A287NA39	Uncharacterized protein OS=Hordeum vulgare subsp. vulgare OX=112509 PE=3 SV=1	0	99	ELNALAEQVVQFVLANESSTGGPR				0.00650626	2528.29	843.772	2528.29	843.77	3	26	6.1.1.5714.19	66.9502	2925.02	2913.14	67.01	0.85	15650.6
1	26.07	26.07	36.69	tr|A0A287NA39	Uncharacterized protein OS=Hordeum vulgare subsp. vulgare OX=112509 PE=3 SV=1	0	99	ELNALAEQVVQFVLANESSTGGPR				0.00650626	2528.29	843.772	2528.29	843.77	3	25	6.1.1.5715.19	67.0447	2925.02	2923.55	67.01	0.85	13974.3
1	26.07	26.07	36.69	tr|A0A287NA39	Uncharacterized protein OS=Hordeum vulgare subsp. vulgare OX=112509 PE=3 SV=1	0	99	ELNALAEQVVQFVLANESSTGGPR				0.157154	2528.44	843.822	2528.29	843.77	3	26	8.1.1.5773.19	66.7913	9067.88	7905.37	66.89	0.28	23615.1
1	26.07	26.07	36.69	tr|A0A287NA39	Uncharacterized protein OS=Hordeum vulgare subsp. vulgare OX=112509 PE=3 SV=1	0	99	ELNALAEQVVQFVLANESSTGGPR				0.157154	2528.44	843.822	2528.29	843.77	3	25	8.1.1.5774.19	66.8859	9067.88	8963.64	66.89	0.28	25926.4
1	26.07	26.07	36.69	tr|A0A287NA39	Uncharacterized protein OS=Hordeum vulgare subsp. vulgare OX=112509 PE=3 SV=1	0	99	ELNALAEQVVQFVLANESSTGGPR				0.157154	2528.44	843.822	2528.29	843.77	3	24	8.1.1.5775.17	66.9721	9067.88	7716.17	66.89	0.28	21839
1	26.07	26.07	36.69	tr|A0A287NA39	Uncharacterized protein OS=Hordeum vulgare subsp. vulgare OX=112509 PE=3 SV=1	0	99	ELNALAEQVVQFVLANESSTGGPR				0.157154	2528.44	843.822	2528.29	843.77	3	23	8.1.1.5776.19	67.0749	9067.88	4614.01	66.89	0.28	15175.6
1	26.07	26.07	36.69	tr|A0A287NA39	Uncharacterized protein OS=Hordeum vulgare subsp. vulgare OX=112509 PE=3 SV=1	0	46.57	ILLPGAQDGLW			cleaved Y-I@N-term; cleaved W-S@C-term	0.00121823	1181.65	591.83	1181.64	591.83	2	12	6.1.1.5704.4	65.9428	72.8925	72.8925			7431.6
1	26.07	26.07	36.69	tr|A0A287NA39	Uncharacterized protein OS=Hordeum vulgare subsp. vulgare OX=112509 PE=3 SV=1	0	46.57	ILLPGAQDGLW			cleaved Y-I@N-term; cleaved W-S@C-term	-0.0053731	1181.64	591.827	1181.64	591.83	2	11	6.1.1.5756.5	70.8687	48.7992	48.7992			5383.29
1	26.07	26.07	36.69	tr|A0A287NA39	Uncharacterized protein OS=Hordeum vulgare subsp. vulgare OX=112509 PE=3 SV=1	0	24.46	ILLPGAQDGLW			cleaved Y-I@N-term; cleaved W-S@C-term	-0.00158918	1181.64	591.829	1181.64	591.83	2	10	6.1.1.5698.3	65.371	68.0487	68.0487			6046.56
1	26.07	26.07	36.69	tr|A0A287NA39	Uncharacterized protein OS=Hordeum vulgare subsp. vulgare OX=112509 PE=3 SV=1	0	99	KVDLVDFVANHPFLF			cleaved L-K@N-term; cleaved F-L@C-term; missed K-V@1	-0.00520497	1759.92	587.649	1759.93	587.651	3	20	5.1.1.6536.2	65.1478	2410.01	2253.89	65.29	0.57	14633
1	26.07	26.07	36.69	tr|A0A287NA39	Uncharacterized protein OS=Hordeum vulgare subsp. vulgare OX=112509 PE=3 SV=1	0	99	KVDLVDFVANHPFLF			cleaved L-K@N-term; cleaved F-L@C-term; missed K-V@1	0.0940826	1760.02	587.682	1759.93	587.651	3	19	7.1.1.5378.4	56.4423	7113.85	6769.98	56.52	0.47	19043
1	26.07	26.07	36.69	tr|A0A287NA39	Uncharacterized protein OS=Hordeum vulgare subsp. vulgare OX=112509 PE=3 SV=1	0	99	KVDLVDFVANHPFLF			cleaved L-K@N-term; cleaved F-L@C-term; missed K-V@1	0.0940826	1760.02	587.682	1759.93	587.651	3	20	7.1.1.5379.4	56.5371	7113.85	7029.61	56.52	0.47	20510
1	26.07	26.07	36.69	tr|A0A287NA39	Uncharacterized protein OS=Hordeum vulgare subsp. vulgare OX=112509 PE=3 SV=1	0	99	KVDLVDFVANHPFLF			cleaved L-K@N-term; cleaved F-L@C-term; missed K-V@1	0.0940826	1760.02	587.682	1759.93	587.651	3	21	7.1.1.5380.4	56.6318	7113.85	6339.42	56.52	0.47	18919.5
1	26.07	26.07	36.69	tr|A0A287NA39	Uncharacterized protein OS=Hordeum vulgare subsp. vulgare OX=112509 PE=3 SV=1	0	99	KVDLVDFVANHPFLF			cleaved L-K@N-term; cleaved F-L@C-term; missed K-V@1	0.0077115	1759.94	587.653	1759.93	587.651	3	21	7.1.1.5448.2	63.0627	12248.6	8849.15	63.16	0.19	15846.1
1	26.07	26.07	36.69	tr|A0A287NA39	Uncharacterized protein OS=Hordeum vulgare subsp. vulgare OX=112509 PE=3 SV=1	0	99	KVDLVDFVANHPFLF			cleaved L-K@N-term; cleaved F-L@C-term; missed K-V@1	0.0077115	1759.94	587.653	1759.93	587.651	3	21	7.1.1.5449.3	63.1617	12248.6	12057.5	63.16	0.19	24233.1
1	26.07	26.07	36.69	tr|A0A287NA39	Uncharacterized protein OS=Hordeum vulgare subsp. vulgare OX=112509 PE=3 SV=1	0	99	KVDLVDFVANHPFLF			cleaved L-K@N-term; cleaved F-L@C-term; missed K-V@1	0.0077115	1759.94	587.653	1759.93	587.651	3	23	7.1.1.5450.2	63.2522	12248.6	10353.8	63.16	0.19	15117.6
1	26.07	26.07	36.69	tr|A0A287NA39	Uncharacterized protein OS=Hordeum vulgare subsp. vulgare OX=112509 PE=3 SV=1	0	99	KVDLVDFVANHPFLF			cleaved L-K@N-term; cleaved F-L@C-term; missed K-V@1	0.0938995	1760.02	587.682	1759.93	587.651	3	21	6.1.1.5598.4	55.9177	5736.27	4842.93	56.21	0.57	20580.8
1	26.07	26.07	36.69	tr|A0A287NA39	Uncharacterized protein OS=Hordeum vulgare subsp. vulgare OX=112509 PE=3 SV=1	0	99	KVDLVDFVANHPFLF			cleaved L-K@N-term; cleaved F-L@C-term; missed K-V@1	0.0938995	1760.02	587.682	1759.93	587.651	3	20	6.1.1.5599.4	56.0121	5736.27	5195.49	56.21	0.57	22349.3
1	26.07	26.07	36.69	tr|A0A287NA39	Uncharacterized protein OS=Hordeum vulgare subsp. vulgare OX=112509 PE=3 SV=1	0	99	KVDLVDFVANHPFLF			cleaved L-K@N-term; cleaved F-L@C-term; missed K-V@1	0.0938995	1760.02	587.682	1759.93	587.651	3	19	6.1.1.5600.5	56.1108	5736.27	5396.82	56.21	0.57	19282.7
1	26.07	26.07	36.69	tr|A0A287NA39	Uncharacterized protein OS=Hordeum vulgare subsp. vulgare OX=112509 PE=3 SV=1	0	99	KVDLVDFVANHPFLF			cleaved L-K@N-term; cleaved F-L@C-term; missed K-V@1	0.0920685	1760.02	587.681	1759.93	587.651	3	22	5.1.1.6457.3	57.6621	5451.39	4760.59	57.89	0.85	23345.6
1	26.07	26.07	36.69	tr|A0A287NA39	Uncharacterized protein OS=Hordeum vulgare subsp. vulgare OX=112509 PE=3 SV=1	0	99	KVDLVDFVANHPFLF			cleaved L-K@N-term; cleaved F-L@C-term; missed K-V@1	0.0920685	1760.02	587.681	1759.93	587.651	3	19	5.1.1.6459.3	57.8518	5451.39	5246.34	57.89	0.85	24386.9
1	26.07	26.07	36.69	tr|A0A287NA39	Uncharacterized protein OS=Hordeum vulgare subsp. vulgare OX=112509 PE=3 SV=1	0	99	KVDLVDFVANHPFLF			cleaved L-K@N-term; cleaved F-L@C-term; missed K-V@1	-0.00581224	1759.92	587.649	1759.93	587.651	3	22	6.1.1.5672.2	62.9143	6211.49	6072.18	63.09	0.57	16848.4
1	26.07	26.07	36.69	tr|A0A287NA39	Uncharacterized protein OS=Hordeum vulgare subsp. vulgare OX=112509 PE=3 SV=1	0	99	KVDLVDFVANHPFLF			cleaved L-K@N-term; cleaved F-L@C-term; missed K-V@1	-0.00581224	1759.92	587.649	1759.93	587.651	3	22	6.1.1.5673.2	63.0089	6211.49	6145.81	63.09	0.57	28643.5
1	26.07	26.07	36.69	tr|A0A287NA39	Uncharacterized protein OS=Hordeum vulgare subsp. vulgare OX=112509 PE=3 SV=1	0	99	KVDLVDFVANHPFLF			cleaved L-K@N-term; cleaved F-L@C-term; missed K-V@1	-0.00581224	1759.92	587.649	1759.93	587.651	3	21	6.1.1.5674.3	63.1074	6211.49	6196.79	63.09	0.57	20387.2
1	26.07	26.07	36.69	tr|A0A287NA39	Uncharacterized protein OS=Hordeum vulgare subsp. vulgare OX=112509 PE=3 SV=1	0	99	KVDLVDFVANHPFLF			cleaved L-K@N-term; cleaved F-L@C-term; missed K-V@1	-0.00581224	1759.92	587.649	1759.93	587.651	3	19	6.1.1.5675.3	63.2018	6211.49	6098.13	63.09	0.57	8438.08
1	26.07	26.07	36.69	tr|A0A287NA39	Uncharacterized protein OS=Hordeum vulgare subsp. vulgare OX=112509 PE=3 SV=1	0	99	KVDLVDFVANHPFLF			cleaved L-K@N-term; cleaved F-L@C-term; missed K-V@1	0.100674	1760.03	587.684	1759.93	587.651	3	20	8.1.1.5670.3	56.9792	5889.92	5721.73	56.97	0.47	19344.7
1	26.07	26.07	36.69	tr|A0A287NA39	Uncharacterized protein OS=Hordeum vulgare subsp. vulgare OX=112509 PE=3 SV=1	0	99	KVDLVDFVANHPFLF			cleaved L-K@N-term; cleaved F-L@C-term; missed K-V@1	0.100674	1760.03	587.684	1759.93	587.651	3	19	8.1.1.5671.4	57.078	5889.92	5720.14	56.97	0.47	16628.4
1	26.07	26.07	36.69	tr|A0A287NA39	Uncharacterized protein OS=Hordeum vulgare subsp. vulgare OX=112509 PE=3 SV=1	0	99	KVDLVDFVANHPFLF			cleaved L-K@N-term; cleaved F-L@C-term; missed K-V@1	0.0884064	1760.02	587.68	1759.93	587.651	3	21	8.1.1.5738.4	63.4233	16488.5	14019.7	63.5	0.19	25855.9
1	26.07	26.07	36.69	tr|A0A287NA39	Uncharacterized protein OS=Hordeum vulgare subsp. vulgare OX=112509 PE=3 SV=1	0	99	KVDLVDFVANHPFLF			cleaved L-K@N-term; cleaved F-L@C-term; missed K-V@1	0.0884064	1760.02	587.68	1759.93	587.651	3	21	8.1.1.5739.3	63.5138	16488.5	15870.3	63.5	0.19	24540.6
1	26.07	26.07	36.69	tr|A0A287NA39	Uncharacterized protein OS=Hordeum vulgare subsp. vulgare OX=112509 PE=3 SV=1	0	99	KVDLVDFVANHPFLF			cleaved L-K@N-term; cleaved F-L@C-term; missed K-V@1	0.0884064	1760.02	587.68	1759.93	587.651	3	21	8.1.1.5740.2	63.6042	16488.5	11689.8	63.5	0.19	13070
1	26.07	26.07	36.69	tr|A0A287NA39	Uncharacterized protein OS=Hordeum vulgare subsp. vulgare OX=112509 PE=3 SV=1	0	99	KVDLVDFVANHPFLF			cleaved L-K@N-term; cleaved F-L@C-term; missed K-V@1	0.13345	1760.06	587.695	1759.93	587.651	3	14	3.1.1.2573.2	60.7767	3277.3	3181.64	60.95	0.57	8601.64
1	26.07	26.07	36.69	tr|A0A287NA39	Uncharacterized protein OS=Hordeum vulgare subsp. vulgare OX=112509 PE=3 SV=1	0	99	KVDLVDFVANHPFLF			cleaved L-K@N-term; cleaved F-L@C-term; missed K-V@1	0.13345	1760.06	587.695	1759.93	587.651	3	15	3.1.1.2575.3	60.9704	3277.3	3258.84	60.95	0.57	14417.4
1	26.07	26.07	36.69	tr|A0A287NA39	Uncharacterized protein OS=Hordeum vulgare subsp. vulgare OX=112509 PE=3 SV=1	0	99	KVDLVDFVANHPFLF			cleaved L-K@N-term; cleaved F-L@C-term; missed K-V@1	0.13345	1760.06	587.695	1759.93	587.651	3	14	3.1.1.2576.2	61.061	3277.3	3143.99	60.95	0.57	12047.7
1	26.07	26.07	36.69	tr|A0A287NA39	Uncharacterized protein OS=Hordeum vulgare subsp. vulgare OX=112509 PE=3 SV=1	0	67.84	KVDLVDFVANHPFLF			cleaved L-K@N-term; cleaved F-L@C-term; missed K-V@1	0.143887	1760.07	587.698	1759.93	587.651	3	14	4.1.1.2665.2	61.5902	4570.2	4551.74	61.57	0.57	14840.1
1	26.07	26.07	36.69	tr|A0A287NA39	Uncharacterized protein OS=Hordeum vulgare subsp. vulgare OX=112509 PE=3 SV=1	0	31.09	KVDLVDFVANHPFLF			cleaved L-K@N-term; cleaved F-L@C-term; missed K-V@1	0.143887	1760.07	587.698	1759.93	587.651	3	13	4.1.1.2664.2	61.4956	4570.2	4453.89	61.57	0.57	13245.8
1	26.07	26.07	36.69	tr|A0A287NA39	Uncharacterized protein OS=Hordeum vulgare subsp. vulgare OX=112509 PE=3 SV=1	0	46.85	QYISSSDNLK	Gln->pyro-Glu@N-term			0.0641262	1136.6	569.307	1136.53	569.275	2	10	8.1.1.5454.15	36.5402	664.87	640.53	36.48	0.47	2075.19
1	26.07	26.07	36.69	tr|A0A287NA39	Uncharacterized protein OS=Hordeum vulgare subsp. vulgare OX=112509 PE=3 SV=1	0	22.18	RLSTEPEFIENHIPK			missed R-L@1	0.0927611	1809.03	453.266	1808.94	453.243	4	16	4.1.1.2281.3	24.7367	10484.1	10297.1	24.7	0.85	34776.4
1	26.07	26.07	36.69	tr|A0A287NA39	Uncharacterized protein OS=Hordeum vulgare subsp. vulgare OX=112509 PE=3 SV=1	0	99	SLITAGAGGATR			cleaved L-S@N-term	0.0692735	1073.65	537.833	1073.58	537.799	2	11	2.1.1.2084.9	15.4285	696.36	533.86	15.84	1.14	1340.17
1	26.07	26.07	36.69	tr|A0A287NA39	Uncharacterized protein OS=Hordeum vulgare subsp. vulgare OX=112509 PE=3 SV=1	0	99	SLITAGAGGATR			cleaved L-S@N-term	0.0692735	1073.65	537.833	1073.58	537.799	2	13	2.1.1.2085.8	15.5314	696.36	589.72	15.84	1.14	1639.11
1	26.07	26.07	36.69	tr|A0A287NA39	Uncharacterized protein OS=Hordeum vulgare subsp. vulgare OX=112509 PE=3 SV=1	0	99	SLITAGAGGATR			cleaved L-S@N-term	0.0692735	1073.65	537.833	1073.58	537.799	2	11	2.1.1.2086.10	15.6218	696.36	627.59	15.84	1.14	1672.24
1	26.07	26.07	36.69	tr|A0A287NA39	Uncharacterized protein OS=Hordeum vulgare subsp. vulgare OX=112509 PE=3 SV=1	0	99	SLITAGAGGATR			cleaved L-S@N-term	0.0509629	1073.63	537.824	1073.58	537.799	2	15	7.1.1.5093.7	29.4193	4931.15	2425.71	29.58	0.38	3596.99
1	26.07	26.07	36.69	tr|A0A287NA39	Uncharacterized protein OS=Hordeum vulgare subsp. vulgare OX=112509 PE=3 SV=1	0	99	SLITAGAGGATR			cleaved L-S@N-term	0.0509629	1073.63	537.824	1073.58	537.799	2	18	7.1.1.5094.9	29.5223	4931.15	4203.31	29.58	0.38	8696.89
1	26.07	26.07	36.69	tr|A0A287NA39	Uncharacterized protein OS=Hordeum vulgare subsp. vulgare OX=112509 PE=3 SV=1	0	99	SLITAGAGGATR			cleaved L-S@N-term	0.0509629	1073.63	537.824	1073.58	537.799	2	18	7.1.1.5095.9	29.6169	4931.15	4802.6	29.58	0.38	9055.15
1	26.07	26.07	36.69	tr|A0A287NA39	Uncharacterized protein OS=Hordeum vulgare subsp. vulgare OX=112509 PE=3 SV=1	0	99	SLITAGAGGATR			cleaved L-S@N-term	0.0509629	1073.63	537.824	1073.58	537.799	2	16	7.1.1.5096.8	29.7073	4931.15	4220.22	29.58	0.38	6953.09
1	26.07	26.07	36.69	tr|A0A287NA39	Uncharacterized protein OS=Hordeum vulgare subsp. vulgare OX=112509 PE=3 SV=1	0	99	SLITAGAGGATR			cleaved L-S@N-term	0.073668	1073.66	537.836	1073.58	537.799	2	13	4.1.1.2211.10	18.1464	1008.37	742.79	18.76	2.84	1470.17
1	26.07	26.07	36.69	tr|A0A287NA39	Uncharacterized protein OS=Hordeum vulgare subsp. vulgare OX=112509 PE=3 SV=1	0	99	SLITAGAGGATR			cleaved L-S@N-term	0.073668	1073.66	537.836	1073.58	537.799	2	15	4.1.1.2215.11	18.5293	1008.37	969.47	18.76	2.84	2140.94
1	26.07	26.07	36.69	tr|A0A287NA39	Uncharacterized protein OS=Hordeum vulgare subsp. vulgare OX=112509 PE=3 SV=1	0	99	SLITAGAGGATR			cleaved L-S@N-term	0.0509629	1073.63	537.824	1073.58	537.799	2	14	7.1.1.5097.8	29.8019	4931.15	3199.32	29.58	0.38	5452.04
1	26.07	26.07	36.69	tr|A0A287NA39	Uncharacterized protein OS=Hordeum vulgare subsp. vulgare OX=112509 PE=3 SV=1	0	99	SLITAGAGGATR			cleaved L-S@N-term	0.073668	1073.66	537.836	1073.58	537.799	2	12	4.1.1.2216.8	18.6114	1008.37	983	18.76	2.84	2101.44
1	26.07	26.07	36.69	tr|A0A287NA39	Uncharacterized protein OS=Hordeum vulgare subsp. vulgare OX=112509 PE=3 SV=1	0	99	SLITAGAGGATR			cleaved L-S@N-term	0.073668	1073.66	537.836	1073.58	537.799	2	13	4.1.1.2218.11	18.813	1008.37	980.54	18.76	2.84	2069.69
1	26.07	26.07	36.69	tr|A0A287NA39	Uncharacterized protein OS=Hordeum vulgare subsp. vulgare OX=112509 PE=3 SV=1	0	99	SLITAGAGGATR			cleaved L-S@N-term	0.073668	1073.66	537.836	1073.58	537.799	2	12	4.1.1.2219.12	18.9118	1008.37	923.08	18.76	2.84	2026.19
1	26.07	26.07	36.69	tr|A0A287NA39	Uncharacterized protein OS=Hordeum vulgare subsp. vulgare OX=112509 PE=3 SV=1	0	99	SLITAGAGGATR			cleaved L-S@N-term	0.073668	1073.66	537.836	1073.58	537.799	2	13	4.1.1.2213.12	18.3441	1008.37	873.53	18.76	2.84	1931.68
1	26.07	26.07	36.69	tr|A0A287NA39	Uncharacterized protein OS=Hordeum vulgare subsp. vulgare OX=112509 PE=3 SV=1	0	99	SLITAGAGGATR			cleaved L-S@N-term	0.0547471	1073.64	537.826	1073.58	537.799	2	17	8.1.1.5407.6	32.0785	4198.77	2446.75	32.23	0.38	4323.69
1	26.07	26.07	36.69	tr|A0A287NA39	Uncharacterized protein OS=Hordeum vulgare subsp. vulgare OX=112509 PE=3 SV=1	0	99	SLITAGAGGATR			cleaved L-S@N-term	0.0547471	1073.64	537.826	1073.58	537.799	2	19	8.1.1.5408.8	32.173	4198.77	3712.98	32.23	0.38	7750.3
1	26.07	26.07	36.69	tr|A0A287NA39	Uncharacterized protein OS=Hordeum vulgare subsp. vulgare OX=112509 PE=3 SV=1	0	99	SLITAGAGGATR			cleaved L-S@N-term	0.0547471	1073.64	537.826	1073.58	537.799	2	16	8.1.1.5409.8	32.2634	4198.77	4060.64	32.23	0.38	7679.36
1	26.07	26.07	36.69	tr|A0A287NA39	Uncharacterized protein OS=Hordeum vulgare subsp. vulgare OX=112509 PE=3 SV=1	0	99	SLITAGAGGATR			cleaved L-S@N-term	0.0547471	1073.64	537.826	1073.58	537.799	2	17	8.1.1.5410.6	32.3539	4198.77	3516.65	32.23	0.38	6252.75
1	26.07	26.07	36.69	tr|A0A287NA39	Uncharacterized protein OS=Hordeum vulgare subsp. vulgare OX=112509 PE=3 SV=1	0	99	SLITAGAGGATR			cleaved L-S@N-term	0.0547471	1073.64	537.826	1073.58	537.799	2	14	8.1.1.5411.10	32.4612	4198.77	2548.64	32.23	0.38	4224.01
1	26.07	26.07	36.69	tr|A0A287NA39	Uncharacterized protein OS=Hordeum vulgare subsp. vulgare OX=112509 PE=3 SV=1	0	99	SLITAGAGGATR			cleaved L-S@N-term	0.0547471	1073.64	537.826	1073.58	537.799	2	16	8.1.1.5412.10	32.5556	4198.77	2001.62	32.23	0.38	3608.49
1	26.07	26.07	36.69	tr|A0A287NA39	Uncharacterized protein OS=Hordeum vulgare subsp. vulgare OX=112509 PE=3 SV=1	0	99	SLITAGAGGATR			cleaved L-S@N-term	0.0547471	1073.64	537.826	1073.58	537.799	2	12	8.1.1.5413.12	32.658	4198.77	1646.57	32.23	0.38	2930.72
1	26.07	26.07	36.69	tr|A0A287NA39	Uncharacterized protein OS=Hordeum vulgare subsp. vulgare OX=112509 PE=3 SV=1	0	99	SLITAGAGGATR			cleaved L-S@N-term	0.0547471	1073.64	537.826	1073.58	537.799	2	14	8.1.1.5414.10	32.7437	4198.77	1431.16	32.23	0.38	2842.2
1	26.07	26.07	36.69	tr|A0A287NA39	Uncharacterized protein OS=Hordeum vulgare subsp. vulgare OX=112509 PE=3 SV=1	0	99	SLITAGAGGATR			cleaved L-S@N-term	0.0547471	1073.64	537.826	1073.58	537.799	2	12	8.1.1.5415.8	32.8297	4198.77	1243.92	32.23	0.38	2535.95
1	26.07	26.07	36.69	tr|A0A287NA39	Uncharacterized protein OS=Hordeum vulgare subsp. vulgare OX=112509 PE=3 SV=1	0	99	SLITAGAGGATR			cleaved L-S@N-term	0.0547471	1073.64	537.826	1073.58	537.799	2	12	8.1.1.5416.7	32.9201	4198.77	1043.95	32.23	0.38	2459.2
1	26.07	26.07	36.69	tr|A0A287NA39	Uncharacterized protein OS=Hordeum vulgare subsp. vulgare OX=112509 PE=3 SV=1	0	99	SLITAGAGGATR			cleaved L-S@N-term	0.0547471	1073.64	537.826	1073.58	537.799	2	12	8.1.1.5417.8	33.0187	4198.77	943.28	32.23	0.38	2485.45
1	26.07	26.07	36.69	tr|A0A287NA39	Uncharacterized protein OS=Hordeum vulgare subsp. vulgare OX=112509 PE=3 SV=1	0	99	SLITAGAGGATR			cleaved L-S@N-term	0.0547471	1073.64	537.826	1073.58	537.799	2	12	8.1.1.5418.9	33.1174	4198.77	888.58	32.23	0.38	3357.47
1	26.07	26.07	36.69	tr|A0A287NA39	Uncharacterized protein OS=Hordeum vulgare subsp. vulgare OX=112509 PE=3 SV=1	0	99	SLITAGAGGATR			cleaved L-S@N-term	0.0547471	1073.64	537.826	1073.58	537.799	2	12	8.1.1.5421.10	33.4047	4198.77	597.07	32.23	0.38	2107.25
1	26.07	26.07	36.69	tr|A0A287NA39	Uncharacterized protein OS=Hordeum vulgare subsp. vulgare OX=112509 PE=3 SV=1	0	99	SLITAGAGGATR			cleaved L-S@N-term	0.0547471	1073.64	537.826	1073.58	537.799	2	10	8.1.1.5422.10	33.4988	4198.77	452.76	32.23	0.38	1281.17
1	26.07	26.07	36.69	tr|A0A287NA39	Uncharacterized protein OS=Hordeum vulgare subsp. vulgare OX=112509 PE=3 SV=1	0	99	SLITAGAGGATR			cleaved L-S@N-term	0.0547471	1073.64	537.826	1073.58	537.799	2	11	8.1.1.5423.7	33.5801	4198.77	371.61	32.23	0.38	1090.16
1	26.07	26.07	36.69	tr|A0A287NA39	Uncharacterized protein OS=Hordeum vulgare subsp. vulgare OX=112509 PE=3 SV=1	0	99	SLITAGAGGATR			cleaved L-S@N-term	0.0503526	1073.63	537.824	1073.58	537.799	2	12	8.1.1.5435.7	34.7111	490.76	437.65	35.34	1.7	1539.17
1	26.07	26.07	36.69	tr|A0A287NA39	Uncharacterized protein OS=Hordeum vulgare subsp. vulgare OX=112509 PE=3 SV=1	0	99	SLITAGAGGATR			cleaved L-S@N-term	0.0503526	1073.63	537.824	1073.58	537.799	2	11	8.1.1.5436.7	34.8052	490.76	350.41	35.34	1.7	1154.16
1	26.07	26.07	36.69	tr|A0A287NA39	Uncharacterized protein OS=Hordeum vulgare subsp. vulgare OX=112509 PE=3 SV=1	0	99	SLITAGAGGATR			cleaved L-S@N-term	0.0543809	1073.64	537.826	1073.58	537.799	2	15	6.1.1.5330.7	30.3541	3387.91	3028.61	30.75	0.85	3488.67
1	26.07	26.07	36.69	tr|A0A287NA39	Uncharacterized protein OS=Hordeum vulgare subsp. vulgare OX=112509 PE=3 SV=1	0	99	SLITAGAGGATR			cleaved L-S@N-term	0.0543809	1073.64	537.826	1073.58	537.799	2	18	6.1.1.5332.12	30.5644	3387.91	3055.44	30.75	0.85	8696.64
1	26.07	26.07	36.69	tr|A0A287NA39	Uncharacterized protein OS=Hordeum vulgare subsp. vulgare OX=112509 PE=3 SV=1	0	99	SLITAGAGGATR			cleaved L-S@N-term	0.0543809	1073.64	537.826	1073.58	537.799	2	15	6.1.1.5333.11	30.6547	3387.91	3185.11	30.75	0.85	6688.33
1	26.07	26.07	36.69	tr|A0A287NA39	Uncharacterized protein OS=Hordeum vulgare subsp. vulgare OX=112509 PE=3 SV=1	0	99	SLITAGAGGATR			cleaved L-S@N-term	0.0543809	1073.64	537.826	1073.58	537.799	2	16	6.1.1.5335.9	30.8356	3387.91	3137.76	30.75	0.85	6003.81
1	26.07	26.07	36.69	tr|A0A287NA39	Uncharacterized protein OS=Hordeum vulgare subsp. vulgare OX=112509 PE=3 SV=1	0	99	SLITAGAGGATR			cleaved L-S@N-term	0.0547471	1073.64	537.826	1073.58	537.799	2	14	8.1.1.5419.8	33.2081	4198.77	854.2	32.23	0.38	4368.26
1	26.07	26.07	36.69	tr|A0A287NA39	Uncharacterized protein OS=Hordeum vulgare subsp. vulgare OX=112509 PE=3 SV=1	0	99	SLITAGAGGATR			cleaved L-S@N-term	0.0525499	1073.64	537.825	1073.58	537.799	2	9	8.1.1.5425.6	33.7648	394.01	366.96	33.83	0.66	1219.23
1	26.07	26.07	36.69	tr|A0A287NA39	Uncharacterized protein OS=Hordeum vulgare subsp. vulgare OX=112509 PE=3 SV=1	0	99	SLITAGAGGATR			cleaved L-S@N-term	0.0525499	1073.64	537.825	1073.58	537.799	2	10	8.1.1.5426.12	33.8849	394.01	381.14	33.83	0.66	1399.17
1	26.07	26.07	36.69	tr|A0A287NA39	Uncharacterized protein OS=Hordeum vulgare subsp. vulgare OX=112509 PE=3 SV=1	0	99	SLITAGAGGATR			cleaved L-S@N-term	0.0525499	1073.64	537.825	1073.58	537.799	2	10	8.1.1.5427.11	33.9751	394.01	353.72	33.83	0.66	1456.17
1	26.07	26.07	36.69	tr|A0A287NA39	Uncharacterized protein OS=Hordeum vulgare subsp. vulgare OX=112509 PE=3 SV=1	0	99	SLITAGAGGATR			cleaved L-S@N-term	0.0503526	1073.63	537.824	1073.58	537.799	2	10	8.1.1.5430.9	34.2479	490.76	350.78	35.34	1.7	1153.16
1	26.07	26.07	36.69	tr|A0A287NA39	Uncharacterized protein OS=Hordeum vulgare subsp. vulgare OX=112509 PE=3 SV=1	0	99	SLITAGAGGATR			cleaved L-S@N-term	0.0503526	1073.63	537.824	1073.58	537.799	2	10	8.1.1.5442.10	35.3855	490.76	453.12	35.34	1.7	1832.18
1	26.07	26.07	36.69	tr|A0A287NA39	Uncharacterized protein OS=Hordeum vulgare subsp. vulgare OX=112509 PE=3 SV=1	0	99	SLITAGAGGATR			cleaved L-S@N-term	0.0503526	1073.63	537.824	1073.58	537.799	2	10	8.1.1.5444.11	35.5783	490.76	363.75	35.34	1.7	1544.17
1	26.07	26.07	36.69	tr|A0A287NA39	Uncharacterized protein OS=Hordeum vulgare subsp. vulgare OX=112509 PE=3 SV=1	0	99	SLITAGAGGATR			cleaved L-S@N-term	0.073668	1073.66	537.836	1073.58	537.799	2	12	4.1.1.2214.11	18.4348	1008.37	931.63	18.76	2.84	2060.69
1	26.07	26.07	36.69	tr|A0A287NA39	Uncharacterized protein OS=Hordeum vulgare subsp. vulgare OX=112509 PE=3 SV=1	0	99	SLITAGAGGATR			cleaved L-S@N-term	0.073668	1073.66	537.836	1073.58	537.799	2	12	4.1.1.2217.11	18.7184	1008.37	1000.66	18.76	2.84	2080.44
1	26.07	26.07	36.69	tr|A0A287NA39	Uncharacterized protein OS=Hordeum vulgare subsp. vulgare OX=112509 PE=3 SV=1	0	99	SLITAGAGGATR			cleaved L-S@N-term	0.0543809	1073.64	537.826	1073.58	537.799	2	16	6.1.1.5331.10	30.4614	3387.91	2996.09	30.75	0.85	10567.2
1	26.07	26.07	36.69	tr|A0A287NA39	Uncharacterized protein OS=Hordeum vulgare subsp. vulgare OX=112509 PE=3 SV=1	0	99	SLITAGAGGATR			cleaved L-S@N-term	0.0543809	1073.64	537.826	1073.58	537.799	2	14	6.1.1.5334.9	30.741	3387.91	3309	30.75	0.85	5584.55
1	26.07	26.07	36.69	tr|A0A287NA39	Uncharacterized protein OS=Hordeum vulgare subsp. vulgare OX=112509 PE=3 SV=1	0	99	SLITAGAGGATR			cleaved L-S@N-term	0.0543809	1073.64	537.826	1073.58	537.799	2	12	6.1.1.5339.10	31.218	3387.91	1267.31	30.75	0.85	2877.71
1	26.07	26.07	36.69	tr|A0A287NA39	Uncharacterized protein OS=Hordeum vulgare subsp. vulgare OX=112509 PE=3 SV=1	0	99	SLITAGAGGATR			cleaved L-S@N-term	0.0543809	1073.64	537.826	1073.58	537.799	2	12	6.1.1.5340.7	31.2997	3387.91	1074	30.75	0.85	2504.14
1	26.07	26.07	36.69	tr|A0A287NA39	Uncharacterized protein OS=Hordeum vulgare subsp. vulgare OX=112509 PE=3 SV=1	0	99	SLITAGAGGATR	Carbamidomethyl@N-term		cleaved L-S@N-term	0.0556223	1130.66	566.337	1130.6	566.309	2	14	7.1.1.5097.12	29.8186	554.91	526.97	29.86	0.47	1691.67
1	26.07	26.07	36.69	tr|A0A287NA39	Uncharacterized protein OS=Hordeum vulgare subsp. vulgare OX=112509 PE=3 SV=1	0	99	SLITAGAGGATR			cleaved L-S@N-term	0.0509629	1073.63	537.824	1073.58	537.799	2	12	7.1.1.5108.7	30.8358	4931.15	497.88	29.58	0.38	2126.13
1	26.07	26.07	36.69	tr|A0A287NA39	Uncharacterized protein OS=Hordeum vulgare subsp. vulgare OX=112509 PE=3 SV=1	0	99	SLITAGAGGATR			cleaved L-S@N-term	0.0543809	1073.64	537.826	1073.58	537.799	2	14	6.1.1.5337.8	31.0208	3387.91	1967.77	30.75	0.85	4787.52
1	26.07	26.07	36.69	tr|A0A287NA39	Uncharacterized protein OS=Hordeum vulgare subsp. vulgare OX=112509 PE=3 SV=1	0	99	SLITAGAGGATR			cleaved L-S@N-term	0.0531602	1073.64	537.825	1073.58	537.799	2	20	5.1.1.6215.16	34.3965	7505.32	6942.15	34.5	0.85	19372.2
1	26.07	26.07	36.69	tr|A0A287NA39	Uncharacterized protein OS=Hordeum vulgare subsp. vulgare OX=112509 PE=3 SV=1	0	99	SLITAGAGGATR			cleaved L-S@N-term	0.0543809	1073.64	537.826	1073.58	537.799	2	11	6.1.1.5345.9	31.7807	3387.91	724.31	30.75	0.85	2319.2
1	26.07	26.07	36.69	tr|A0A287NA39	Uncharacterized protein OS=Hordeum vulgare subsp. vulgare OX=112509 PE=3 SV=1	0	99	SLITAGAGGATR			cleaved L-S@N-term	0.0543809	1073.64	537.826	1073.58	537.799	2	14	6.1.1.5336.9	30.9302	3387.91	2540.08	30.75	0.85	5946.31
1	26.07	26.07	36.69	tr|A0A287NA39	Uncharacterized protein OS=Hordeum vulgare subsp. vulgare OX=112509 PE=3 SV=1	0	99	SLITAGAGGATR			cleaved L-S@N-term	0.0543809	1073.64	537.826	1073.58	537.799	2	12	6.1.1.5338.10	31.1237	3387.91	1490.52	30.75	0.85	3681.72
1	26.07	26.07	36.69	tr|A0A287NA39	Uncharacterized protein OS=Hordeum vulgare subsp. vulgare OX=112509 PE=3 SV=1	0	99	SLITAGAGGATR			cleaved L-S@N-term	0.073668	1073.66	537.836	1073.58	537.799	2	11	4.1.1.2220.9	18.994	1008.37	875.27	18.76	2.84	1929.68
1	26.07	26.07	36.69	tr|A0A287NA39	Uncharacterized protein OS=Hordeum vulgare subsp. vulgare OX=112509 PE=3 SV=1	0	99	SLITAGAGGATR			cleaved L-S@N-term	0.073668	1073.66	537.836	1073.58	537.799	2	11	4.1.1.2223.10	19.2823	1008.37	692.19	18.76	2.84	1861.18
1	26.07	26.07	36.69	tr|A0A287NA39	Uncharacterized protein OS=Hordeum vulgare subsp. vulgare OX=112509 PE=3 SV=1	0	99	SLITAGAGGATR			cleaved L-S@N-term	0.0735459	1073.66	537.836	1073.58	537.799	2	14	3.1.1.2117.12	17.3364	1026.39	805.4	17.77	2.84	1835.18
1	26.07	26.07	36.69	tr|A0A287NA39	Uncharacterized protein OS=Hordeum vulgare subsp. vulgare OX=112509 PE=3 SV=1	0	99	SLITAGAGGATR			cleaved L-S@N-term	0.0733018	1073.66	537.835	1073.58	537.799	2	15	3.1.1.2098.6	15.5246	1784.86	1420.02	15.21	0.85	2808.15
1	26.07	26.07	36.69	tr|A0A287NA39	Uncharacterized protein OS=Hordeum vulgare subsp. vulgare OX=112509 PE=3 SV=1	0	99	SLITAGAGGATR			cleaved L-S@N-term	0.0733018	1073.66	537.835	1073.58	537.799	2	14	3.1.1.2102.10	15.9113	1784.86	872.25	15.21	0.85	1931.12
1	26.07	26.07	36.69	tr|A0A287NA39	Uncharacterized protein OS=Hordeum vulgare subsp. vulgare OX=112509 PE=3 SV=1	0	99	SLITAGAGGATR			cleaved L-S@N-term	0.0735459	1073.66	537.836	1073.58	537.799	2	15	3.1.1.2119.10	17.5175	1026.39	917.89	17.77	2.84	2257.45
1	26.07	26.07	36.69	tr|A0A287NA39	Uncharacterized protein OS=Hordeum vulgare subsp. vulgare OX=112509 PE=3 SV=1	0	99	SLITAGAGGATR			cleaved L-S@N-term	0.0735459	1073.66	537.836	1073.58	537.799	2	13	3.1.1.2122.13	17.8142	1026.39	1011.97	17.77	2.84	2210.94
1	26.07	26.07	36.69	tr|A0A287NA39	Uncharacterized protein OS=Hordeum vulgare subsp. vulgare OX=112509 PE=3 SV=1	0	99	SLITAGAGGATR			cleaved L-S@N-term	0.0733018	1073.66	537.835	1073.58	537.799	2	16	3.1.1.2092.11	14.9654	1784.86	1463.3	15.21	0.85	4723.9
1	26.07	26.07	36.69	tr|A0A287NA39	Uncharacterized protein OS=Hordeum vulgare subsp. vulgare OX=112509 PE=3 SV=1	0	99	SLITAGAGGATR			cleaved L-S@N-term	0.0733018	1073.66	537.835	1073.58	537.799	2	15	3.1.1.2099.9	15.6275	1784.86	1248.88	15.21	0.85	2839.15
1	26.07	26.07	36.69	tr|A0A287NA39	Uncharacterized protein OS=Hordeum vulgare subsp. vulgare OX=112509 PE=3 SV=1	0	99	SLITAGAGGATR			cleaved L-S@N-term	0.0735459	1073.66	537.836	1073.58	537.799	2	13	3.1.1.2118.10	17.4229	1026.39	863.76	17.77	2.84	2213.44
1	26.07	26.07	36.69	tr|A0A287NA39	Uncharacterized protein OS=Hordeum vulgare subsp. vulgare OX=112509 PE=3 SV=1	0	99	SLITAGAGGATR			cleaved L-S@N-term	0.0531602	1073.64	537.825	1073.58	537.799	2	20	5.1.1.6213.7	34.2157	7505.32	5996.14	34.5	0.85	11248.9
1	26.07	26.07	36.69	tr|A0A287NA39	Uncharacterized protein OS=Hordeum vulgare subsp. vulgare OX=112509 PE=3 SV=1	0	99	SLITAGAGGATR			cleaved L-S@N-term	0.0733018	1073.66	537.835	1073.58	537.799	2	14	3.1.1.2093.9	15.0517	1784.86	1580.9	15.21	0.85	4893.03
1	26.07	26.07	36.69	tr|A0A287NA39	Uncharacterized protein OS=Hordeum vulgare subsp. vulgare OX=112509 PE=3 SV=1	0	99	SLITAGAGGATR			cleaved L-S@N-term	0.0733018	1073.66	537.835	1073.58	537.799	2	15	3.1.1.2097.8	15.4383	1784.86	1535.05	15.21	0.85	2997.91
1	26.07	26.07	36.69	tr|A0A287NA39	Uncharacterized protein OS=Hordeum vulgare subsp. vulgare OX=112509 PE=3 SV=1	0	99	SLITAGAGGATR			cleaved L-S@N-term	0.0531602	1073.64	537.825	1073.58	537.799	2	18	5.1.1.6218.15	34.676	7505.32	6170.42	34.5	0.85	10323.2
1	26.07	26.07	36.69	tr|A0A287NA39	Uncharacterized protein OS=Hordeum vulgare subsp. vulgare OX=112509 PE=3 SV=1	0	99	SLITAGAGGATR			cleaved L-S@N-term	0.0531602	1073.64	537.825	1073.58	537.799	2	14	5.1.1.6225.14	35.3333	7505.32	1608.93	34.5	0.85	2434.2
1	26.07	26.07	36.69	tr|A0A287NA39	Uncharacterized protein OS=Hordeum vulgare subsp. vulgare OX=112509 PE=3 SV=1	0	99	SLITAGAGGATR			cleaved L-S@N-term	0.0733018	1073.66	537.835	1073.58	537.799	2	13	3.1.1.2101.7	15.8166	1784.86	966.36	15.21	0.85	2292.13
1	26.07	26.07	36.69	tr|A0A287NA39	Uncharacterized protein OS=Hordeum vulgare subsp. vulgare OX=112509 PE=3 SV=1	0	99	SLITAGAGGATR			cleaved L-S@N-term	0.0733018	1073.66	537.835	1073.58	537.799	2	15	3.1.1.2089.10	14.6814	1784.86	867.19	15.21	0.85	1653.11
1	26.07	26.07	36.69	tr|A0A287NA39	Uncharacterized protein OS=Hordeum vulgare subsp. vulgare OX=112509 PE=3 SV=1	0	99	SLITAGAGGATR			cleaved L-S@N-term	0.0733018	1073.66	537.835	1073.58	537.799	2	13	3.1.1.2091.11	14.8707	1784.86	1292.89	15.21	0.85	3760.74
1	26.07	26.07	36.69	tr|A0A287NA39	Uncharacterized protein OS=Hordeum vulgare subsp. vulgare OX=112509 PE=3 SV=1	0	99	SLITAGAGGATR			cleaved L-S@N-term	0.0735459	1073.66	537.836	1073.58	537.799	2	12	3.1.1.2127.11	18.2796	1026.39	834.03	17.77	2.84	2317.2
1	26.07	26.07	36.69	tr|A0A287NA39	Uncharacterized protein OS=Hordeum vulgare subsp. vulgare OX=112509 PE=3 SV=1	0	99	SLITAGAGGATR			cleaved L-S@N-term	0.073668	1073.66	537.836	1073.58	537.799	2	12	4.1.1.2212.10	18.2411	1008.37	807.5	18.76	2.84	1733.18
1	26.07	26.07	36.69	tr|A0A287NA39	Uncharacterized protein OS=Hordeum vulgare subsp. vulgare OX=112509 PE=3 SV=1	0	99	SLITAGAGGATR			cleaved L-S@N-term	0.0735459	1073.66	537.836	1073.58	537.799	2	12	3.1.1.2115.8	17.1299	1026.39	668.18	17.77	2.84	1562.17
1	26.07	26.07	36.69	tr|A0A287NA39	Uncharacterized protein OS=Hordeum vulgare subsp. vulgare OX=112509 PE=3 SV=1	0	99	SLITAGAGGATR			cleaved L-S@N-term	0.0735459	1073.66	537.836	1073.58	537.799	2	13	3.1.1.2123.13	17.9091	1026.39	987.7	17.77	2.84	2189.69
1	26.07	26.07	36.69	tr|A0A287NA39	Uncharacterized protein OS=Hordeum vulgare subsp. vulgare OX=112509 PE=3 SV=1	0	99	SLITAGAGGATR			cleaved L-S@N-term	0.0509629	1073.63	537.824	1073.58	537.799	2	13	7.1.1.5098.7	29.8922	4931.15	2417.27	29.58	0.38	5403.04
1	26.07	26.07	36.69	tr|A0A287NA39	Uncharacterized protein OS=Hordeum vulgare subsp. vulgare OX=112509 PE=3 SV=1	0	99	SLITAGAGGATR			cleaved L-S@N-term	0.0733018	1073.66	537.835	1073.58	537.799	2	14	3.1.1.2096.7	15.3354	1784.86	1643.54	15.21	0.85	3258.66
1	26.07	26.07	36.69	tr|A0A287NA39	Uncharacterized protein OS=Hordeum vulgare subsp. vulgare OX=112509 PE=3 SV=1	0	99	SLITAGAGGATR			cleaved L-S@N-term	0.0735459	1073.66	537.836	1073.58	537.799	2	12	3.1.1.2124.11	17.9955	1026.39	965.6	17.77	2.84	2159.69
1	26.07	26.07	36.69	tr|A0A287NA39	Uncharacterized protein OS=Hordeum vulgare subsp. vulgare OX=112509 PE=3 SV=1	0	99	SLITAGAGGATR			cleaved L-S@N-term	0.0733018	1073.66	537.835	1073.58	537.799	2	13	3.1.1.2100.8	15.7137	1784.86	1105.52	15.21	0.85	2731.9
1	26.07	26.07	36.69	tr|A0A287NA39	Uncharacterized protein OS=Hordeum vulgare subsp. vulgare OX=112509 PE=3 SV=1	0	99	SLITAGAGGATR			cleaved L-S@N-term	0.0733018	1073.66	537.835	1073.58	537.799	2	13	3.1.1.2094.9	15.1462	1784.86	1709.81	15.21	0.85	4217.76
1	26.07	26.07	36.69	tr|A0A287NA39	Uncharacterized protein OS=Hordeum vulgare subsp. vulgare OX=112509 PE=3 SV=1	0	99	SLITAGAGGATR			cleaved L-S@N-term	0.0733018	1073.66	537.835	1073.58	537.799	2	11	3.1.1.2108.11	16.4791	1784.86	479.71	15.21	0.85	1326.17
1	26.07	26.07	36.69	tr|A0A287NA39	Uncharacterized protein OS=Hordeum vulgare subsp. vulgare OX=112509 PE=3 SV=1	0	99	SLITAGAGGATR			cleaved L-S@N-term	0.0735459	1073.66	537.836	1073.58	537.799	2	11	3.1.1.2111.11	16.7632	1026.39	494.05	17.77	2.84	1295.17
1	26.07	26.07	36.69	tr|A0A287NA39	Uncharacterized protein OS=Hordeum vulgare subsp. vulgare OX=112509 PE=3 SV=1	0	99	SLITAGAGGATR			cleaved L-S@N-term	0.0735459	1073.66	537.836	1073.58	537.799	2	12	3.1.1.2120.12	17.6206	1026.39	964.45	17.77	2.84	2295.45
1	26.07	26.07	36.69	tr|A0A287NA39	Uncharacterized protein OS=Hordeum vulgare subsp. vulgare OX=112509 PE=3 SV=1	0	99	SLITAGAGGATR			cleaved L-S@N-term	0.0735459	1073.66	537.836	1073.58	537.799	2	12	3.1.1.2129.8	18.4566	1026.39	724.02	17.77	2.84	2395.2
1	26.07	26.07	36.69	tr|A0A287NA39	Uncharacterized protein OS=Hordeum vulgare subsp. vulgare OX=112509 PE=3 SV=1	0	99	SLITAGAGGATR			cleaved L-S@N-term	0.0531602	1073.64	537.825	1073.58	537.799	2	16	5.1.1.6217.16	34.5854	7505.32	6930.01	34.5	0.85	12111.5
1	26.07	26.07	36.69	tr|A0A287NA39	Uncharacterized protein OS=Hordeum vulgare subsp. vulgare OX=112509 PE=3 SV=1	0	99	SLITAGAGGATR			cleaved L-S@N-term	0.0733018	1073.66	537.835	1073.58	537.799	2	11	3.1.1.2104.11	16.1006	1784.86	691.94	15.21	0.85	1469.17
1	26.07	26.07	36.69	tr|A0A287NA39	Uncharacterized protein OS=Hordeum vulgare subsp. vulgare OX=112509 PE=3 SV=1	0	99	SLITAGAGGATR			cleaved L-S@N-term	0.0531602	1073.64	537.825	1073.58	537.799	2	12	5.1.1.6231.10	35.8843	7505.32	1168.45	34.5	0.85	2637.02
1	26.07	26.07	36.69	tr|A0A287NA39	Uncharacterized protein OS=Hordeum vulgare subsp. vulgare OX=112509 PE=3 SV=1	0	99	SLITAGAGGATR			cleaved L-S@N-term	0.0531602	1073.64	537.825	1073.58	537.799	2	19	5.1.1.6214.9	34.306	7505.32	6518.54	34.5	0.85	20671.9
1	26.07	26.07	36.69	tr|A0A287NA39	Uncharacterized protein OS=Hordeum vulgare subsp. vulgare OX=112509 PE=3 SV=1	0	99	SLITAGAGGATR			cleaved L-S@N-term	0.0531602	1073.64	537.825	1073.58	537.799	2	12	5.1.1.6226.12	35.4194	7505.32	1418.82	34.5	0.85	2547.7
1	26.07	26.07	36.69	tr|A0A287NA39	Uncharacterized protein OS=Hordeum vulgare subsp. vulgare OX=112509 PE=3 SV=1	0	99	SLITAGAGGATR			cleaved L-S@N-term	0.0697618	1073.65	537.834	1073.58	537.799	2	14	5.1.1.6243.13	37.034	3603.63	624.55	37.64	0.57	4579.27
1	26.07	26.07	36.69	tr|A0A287NA39	Uncharacterized protein OS=Hordeum vulgare subsp. vulgare OX=112509 PE=3 SV=1	0	99	SLITAGAGGATR			cleaved L-S@N-term	0.0531602	1073.64	537.825	1073.58	537.799	2	13	5.1.1.6228.12	35.6086	7505.32	1219.47	34.5	0.85	2513.7
1	26.07	26.07	36.69	tr|A0A287NA39	Uncharacterized protein OS=Hordeum vulgare subsp. vulgare OX=112509 PE=3 SV=1	0	99	SLITAGAGGATR			cleaved L-S@N-term	0.0735459	1073.66	537.836	1073.58	537.799	2	11	3.1.1.2125.11	18.0902	1026.39	929.46	17.77	2.84	2323.45
1	26.07	26.07	36.69	tr|A0A287NA39	Uncharacterized protein OS=Hordeum vulgare subsp. vulgare OX=112509 PE=3 SV=1	0	99	SLITAGAGGATR			cleaved L-S@N-term	0.0735459	1073.66	537.836	1073.58	537.799	2	11	3.1.1.2128.10	18.3702	1026.39	781.35	17.77	2.84	2400.45
1	26.07	26.07	36.69	tr|A0A287NA39	Uncharacterized protein OS=Hordeum vulgare subsp. vulgare OX=112509 PE=3 SV=1	0	99	SLITAGAGGATR			cleaved L-S@N-term	0.0733018	1073.66	537.835	1073.58	537.799	2	12	3.1.1.2090.10	14.7761	1784.86	1080.04	15.21	0.85	2571.17
1	26.07	26.07	36.69	tr|A0A287NA39	Uncharacterized protein OS=Hordeum vulgare subsp. vulgare OX=112509 PE=3 SV=1	0	99	SLITAGAGGATR			cleaved L-S@N-term	0.0531602	1073.64	537.825	1073.58	537.799	2	12	5.1.1.6230.12	35.7976	7505.32	1170.76	34.5	0.85	2228.7
1	26.07	26.07	36.69	tr|A0A287NA39	Uncharacterized protein OS=Hordeum vulgare subsp. vulgare OX=112509 PE=3 SV=1	0	99	SLITAGAGGATR			cleaved L-S@N-term	0.0531602	1073.64	537.825	1073.58	537.799	2	16	5.1.1.6216.17	34.495	7505.32	7403.52	34.5	0.85	14567.3
1	26.07	26.07	36.69	tr|A0A287NA39	Uncharacterized protein OS=Hordeum vulgare subsp. vulgare OX=112509 PE=3 SV=1	0	99	SLITAGAGGATR			cleaved L-S@N-term	0.0531602	1073.64	537.825	1073.58	537.799	2	16	5.1.1.6219.13	34.7624	7505.32	5446.45	34.5	0.85	9268.41
1	26.07	26.07	36.69	tr|A0A287NA39	Uncharacterized protein OS=Hordeum vulgare subsp. vulgare OX=112509 PE=3 SV=1	0	99	SLITAGAGGATR			cleaved L-S@N-term	0.0543809	1073.64	537.826	1073.58	537.799	2	12	6.1.1.5342.9	31.4969	3387.91	837.73	30.75	0.85	2198.18
1	26.07	26.07	36.69	tr|A0A287NA39	Uncharacterized protein OS=Hordeum vulgare subsp. vulgare OX=112509 PE=3 SV=1	0	99	SLITAGAGGATR			cleaved L-S@N-term	0.0531602	1073.64	537.825	1073.58	537.799	2	15	5.1.1.6221.14	34.9556	7505.32	3742.55	34.5	0.85	7380.85
1	26.07	26.07	36.69	tr|A0A287NA39	Uncharacterized protein OS=Hordeum vulgare subsp. vulgare OX=112509 PE=3 SV=1	0	99	SLITAGAGGATR			cleaved L-S@N-term	0.0531602	1073.64	537.825	1073.58	537.799	2	15	5.1.1.6222.12	35.0416	7505.32	2974.93	34.5	0.85	6982.59
1	26.07	26.07	36.69	tr|A0A287NA39	Uncharacterized protein OS=Hordeum vulgare subsp. vulgare OX=112509 PE=3 SV=1	0	99	SLITAGAGGATR			cleaved L-S@N-term	0.0531602	1073.64	537.825	1073.58	537.799	2	12	5.1.1.6229.11	35.699	7505.32	1173.39	34.5	0.85	2366.2
1	26.07	26.07	36.69	tr|A0A287NA39	Uncharacterized protein OS=Hordeum vulgare subsp. vulgare OX=112509 PE=3 SV=1	0	99	SLITAGAGGATR			cleaved L-S@N-term	0.0531602	1073.64	537.825	1073.58	537.799	2	15	5.1.1.6220.15	34.8652	7505.32	4549.59	34.5	0.85	6764.08
1	26.07	26.07	36.69	tr|A0A287NA39	Uncharacterized protein OS=Hordeum vulgare subsp. vulgare OX=112509 PE=3 SV=1	0	99	SLITAGAGGATR			cleaved L-S@N-term	0.0531602	1073.64	537.825	1073.58	537.799	2	12	5.1.1.6227.14	35.5223	7505.32	1310.42	34.5	0.85	2201.63
1	26.07	26.07	36.69	tr|A0A287NA39	Uncharacterized protein OS=Hordeum vulgare subsp. vulgare OX=112509 PE=3 SV=1	0	99	SLITAGAGGATR			cleaved L-S@N-term	0.073668	1073.66	537.836	1073.58	537.799	2	11	4.1.1.2229.9	19.8458	1008.37	412.23	18.76	2.84	1790.18
1	26.07	26.07	36.69	tr|A0A287NA39	Uncharacterized protein OS=Hordeum vulgare subsp. vulgare OX=112509 PE=3 SV=1	0	99	SLITAGAGGATR			cleaved L-S@N-term	0.0733018	1073.66	537.835	1073.58	537.799	2	11	3.1.1.2105.11	16.1952	1784.86	613.37	15.21	0.85	1350.17
1	26.07	26.07	36.69	tr|A0A287NA39	Uncharacterized protein OS=Hordeum vulgare subsp. vulgare OX=112509 PE=3 SV=1	0	99	SLITAGAGGATR			cleaved L-S@N-term	0.0735459	1073.66	537.836	1073.58	537.799	2	12	3.1.1.2131.10	18.6544	1026.39	599.45	17.77	2.84	2408.2
1	26.07	26.07	36.69	tr|A0A287NA39	Uncharacterized protein OS=Hordeum vulgare subsp. vulgare OX=112509 PE=3 SV=1	0	98.94	SLITAGAGGATR			cleaved L-S@N-term	0.0697618	1073.65	537.834	1073.58	537.799	2	14	5.1.1.6242.13	36.9389	3603.63	628.81	37.64	0.57	4564.27
1	26.07	26.07	36.69	tr|A0A287NA39	Uncharacterized protein OS=Hordeum vulgare subsp. vulgare OX=112509 PE=3 SV=1	0	98.84	SLITAGAGGATR			cleaved L-S@N-term	0.0733018	1073.66	537.835	1073.58	537.799	2	12	3.1.1.2095.10	15.245	1784.86	1738.77	15.21	0.85	3872.99
1	26.07	26.07	36.69	tr|A0A287NA39	Uncharacterized protein OS=Hordeum vulgare subsp. vulgare OX=112509 PE=3 SV=1	0	98.84	SLITAGAGGATR			cleaved L-S@N-term	0.0735459	1073.66	537.836	1073.58	537.799	2	12	3.1.1.2126.12	18.1891	1026.39	879.65	17.77	2.84	2226.02
1	26.07	26.07	36.69	tr|A0A287NA39	Uncharacterized protein OS=Hordeum vulgare subsp. vulgare OX=112509 PE=3 SV=1	0	98.6	SLITAGAGGATR			cleaved L-S@N-term	0.0733018	1073.66	537.835	1073.58	537.799	2	11	3.1.1.2103.7	15.9976	1784.86	786.42	15.21	0.85	1706.62
1	26.07	26.07	36.69	tr|A0A287NA39	Uncharacterized protein OS=Hordeum vulgare subsp. vulgare OX=112509 PE=3 SV=1	0	98.6	SLITAGAGGATR			cleaved L-S@N-term	0.0735459	1073.66	537.836	1073.58	537.799	2	12	3.1.1.2121.11	17.7111	1026.39	1005.3	17.77	2.84	2313.13
1	26.07	26.07	36.69	tr|A0A287NA39	Uncharacterized protein OS=Hordeum vulgare subsp. vulgare OX=112509 PE=3 SV=1	0	98.6	SLITAGAGGATR			cleaved L-S@N-term	0.0531602	1073.64	537.825	1073.58	537.799	2	12	5.1.1.6224.13	35.2346	7505.32	1999.56	34.5	0.85	3896.49
1	26.07	26.07	36.69	tr|A0A287NA39	Uncharacterized protein OS=Hordeum vulgare subsp. vulgare OX=112509 PE=3 SV=1	0	97.98	SLITAGAGGATR			cleaved L-S@N-term	0.0509629	1073.63	537.824	1073.58	537.799	2	11	7.1.1.5103.11	30.3809	4931.15	682.58	29.58	0.38	2742.21
1	26.07	26.07	36.69	tr|A0A287NA39	Uncharacterized protein OS=Hordeum vulgare subsp. vulgare OX=112509 PE=3 SV=1	0	97.98	SLITAGAGGATR			cleaved L-S@N-term	0.0509629	1073.63	537.824	1073.58	537.799	2	12	7.1.1.5105.7	30.5527	4931.15	607.5	29.58	0.38	2546.2
1	26.07	26.07	36.69	tr|A0A287NA39	Uncharacterized protein OS=Hordeum vulgare subsp. vulgare OX=112509 PE=3 SV=1	0	96.31	SLITAGAGGATR			cleaved L-S@N-term	0.073668	1073.66	537.836	1073.58	537.799	2	11	4.1.1.2210.11	18.0559	1008.37	677.65	18.76	2.84	1450.81
1	26.07	26.07	36.69	tr|A0A287NA39	Uncharacterized protein OS=Hordeum vulgare subsp. vulgare OX=112509 PE=3 SV=1	0	94.92	SLITAGAGGATR			cleaved L-S@N-term	0.0531602	1073.64	537.825	1073.58	537.799	2	12	5.1.1.6223.13	35.1404	7505.32	2372.76	34.5	0.85	4928.28
1	26.07	26.07	36.69	tr|A0A287NA39	Uncharacterized protein OS=Hordeum vulgare subsp. vulgare OX=112509 PE=3 SV=1	0	93.54	SLITAGAGGATR			cleaved L-S@N-term	0.0735459	1073.66	537.836	1073.58	537.799	2	10	3.1.1.2132.9	18.745	1026.39	553.25	17.77	2.84	2348.2
1	26.07	26.07	36.69	tr|A0A287NA39	Uncharacterized protein OS=Hordeum vulgare subsp. vulgare OX=112509 PE=3 SV=1	0	93.23	SLITAGAGGATR			cleaved L-S@N-term	0.0509629	1073.63	537.824	1073.58	537.799	2	12	7.1.1.5101.10	30.1877	4931.15	978.28	29.58	0.38	3778.99
1	26.07	26.07	36.69	tr|A0A287NA39	Uncharacterized protein OS=Hordeum vulgare subsp. vulgare OX=112509 PE=3 SV=1	0	87.1	SLITAGAGGATR			cleaved L-S@N-term	0.0733018	1073.66	537.835	1073.58	537.799	2	10	3.1.1.2107.13	16.3928	1784.86	489.6	15.21	0.85	1385.17
1	26.07	26.07	36.69	tr|A0A287NA39	Uncharacterized protein OS=Hordeum vulgare subsp. vulgare OX=112509 PE=3 SV=1	0	87.1	SLITAGAGGATR			cleaved L-S@N-term	0.0735459	1073.66	537.836	1073.58	537.799	2	10	3.1.1.2112.13	16.8663	1026.39	516.1	17.77	2.84	1360.17
1	26.07	26.07	36.69	tr|A0A287NA39	Uncharacterized protein OS=Hordeum vulgare subsp. vulgare OX=112509 PE=3 SV=1	0	71.74	SLITAGAGGATR			cleaved L-S@N-term	0.0733018	1073.66	537.835	1073.58	537.799	2	9	3.1.1.2109.13	16.5821	1784.86	467.91	15.21	0.85	1305.17
1	26.07	26.07	36.69	tr|A0A287NA39	Uncharacterized protein OS=Hordeum vulgare subsp. vulgare OX=112509 PE=3 SV=1	0	67.7	SLITAGAGGATR			cleaved L-S@N-term	0.0509629	1073.63	537.824	1073.58	537.799	2	12	7.1.1.5102.8	30.2738	4931.15	770.81	29.58	0.38	2652.21
1	26.07	26.07	36.69	tr|A0A287NA39	Uncharacterized protein OS=Hordeum vulgare subsp. vulgare OX=112509 PE=3 SV=1	0	54.63	SLITAGAGGATR			cleaved L-S@N-term	0.0692735	1073.65	537.833	1073.58	537.799	2	11	2.1.1.2089.12	15.9142	696.36	655.32	15.84	1.14	1205.11
1	26.07	26.07	36.69	tr|A0A287NA39	Uncharacterized protein OS=Hordeum vulgare subsp. vulgare OX=112509 PE=3 SV=1	0	53	SLITAGAGGATR			cleaved L-S@N-term	0.0509629	1073.63	537.824	1073.58	537.799	2	10	7.1.1.5106.6	30.6427	4931.15	537.39	29.58	0.38	2032.19
1	26.07	26.07	36.69	tr|A0A287NA39	Uncharacterized protein OS=Hordeum vulgare subsp. vulgare OX=112509 PE=3 SV=1	0	51.69	SLITAGAGGATR			cleaved L-S@N-term	0.0503526	1073.63	537.824	1073.58	537.799	2	8	8.1.1.5431.10	34.346	490.76	392.61	35.34	1.7	1361.17
1	26.07	26.07	36.69	tr|A0A287NA39	Uncharacterized protein OS=Hordeum vulgare subsp. vulgare OX=112509 PE=3 SV=1	0	49.95	SLITAGAGGATR			cleaved L-S@N-term	0.0525499	1073.64	537.825	1073.58	537.799	2	11	8.1.1.5424.6	33.6703	394.01	334.55	33.83	0.66	1008.16
1	26.07	26.07	36.69	tr|A0A287NA39	Uncharacterized protein OS=Hordeum vulgare subsp. vulgare OX=112509 PE=3 SV=1	0	49.11	SLITAGAGGATR			cleaved L-S@N-term	0.0503526	1073.63	537.824	1073.58	537.799	2	10	8.1.1.5434.5	34.6086	490.76	484.8	35.34	1.7	1705.18
1	26.07	26.07	36.69	tr|A0A287NA39	Uncharacterized protein OS=Hordeum vulgare subsp. vulgare OX=112509 PE=3 SV=1	0	49.11	SLITAGAGGATR			cleaved L-S@N-term	0.0503526	1073.63	537.824	1073.58	537.799	2	10	8.1.1.5443.11	35.4839	490.76	446.79	35.34	1.7	1672.18
1	26.07	26.07	36.69	tr|A0A287NA39	Uncharacterized protein OS=Hordeum vulgare subsp. vulgare OX=112509 PE=3 SV=1	0	48.01	SLITAGAGGATR			cleaved L-S@N-term	0.0692735	1073.65	537.833	1073.58	537.799	2	11	2.1.1.2088.9	15.8069	696.36	680.6	15.84	1.14	1319.17
1	26.07	26.07	36.69	tr|A0A287NA39	Uncharacterized protein OS=Hordeum vulgare subsp. vulgare OX=112509 PE=3 SV=1	0	45.1	SLITAGAGGATR			cleaved L-S@N-term	0.073668	1073.66	537.836	1073.58	537.799	2	10	4.1.1.2208.12	17.8707	1008.37	566.5	18.76	2.84	1293.17
1	26.07	26.07	36.69	tr|A0A287NA39	Uncharacterized protein OS=Hordeum vulgare subsp. vulgare OX=112509 PE=3 SV=1	0	45.08	SLITAGAGGATR			cleaved L-S@N-term	0.0547471	1073.64	537.826	1073.58	537.799	2	9	8.1.1.5406.8	31.9802	4198.77	1012.36	32.23	0.38	1102.16
1	26.07	26.07	36.69	tr|A0A287NA39	Uncharacterized protein OS=Hordeum vulgare subsp. vulgare OX=112509 PE=3 SV=1	0	39.69	SLITAGAGGATR			cleaved L-S@N-term	0.0503526	1073.63	537.824	1073.58	537.799	2	9	8.1.1.5440.10	35.1962	490.76	366.51	35.34	1.7	1927.18
1	26.07	26.07	36.69	tr|A0A287NA39	Uncharacterized protein OS=Hordeum vulgare subsp. vulgare OX=112509 PE=3 SV=1	0	37.72	SLITAGAGGATR			cleaved L-S@N-term	0.0503526	1073.63	537.824	1073.58	537.799	2	10	8.1.1.5441.10	35.2909	490.76	424.73	35.34	1.7	2053.19
1	26.07	26.07	36.69	tr|A0A287NA39	Uncharacterized protein OS=Hordeum vulgare subsp. vulgare OX=112509 PE=3 SV=1	0	35.87	SLITAGAGGATR			cleaved L-S@N-term	0.0509629	1073.63	537.824	1073.58	537.799	2	11	7.1.1.5112.9	31.2224	567.35	552.91	31.18	0.57	2427.2
1	26.07	26.07	36.69	tr|A0A287NA39	Uncharacterized protein OS=Hordeum vulgare subsp. vulgare OX=112509 PE=3 SV=1	0	35.24	SLITAGAGGATR			cleaved L-S@N-term	0.0733018	1073.66	537.835	1073.58	537.799	2	8	3.1.1.2106.9	16.2814	1784.86	541.76	15.21	0.85	1276.17
1	26.07	26.07	36.69	tr|A0A287NA39	Uncharacterized protein OS=Hordeum vulgare subsp. vulgare OX=112509 PE=3 SV=1	0	34.28	SLITAGAGGATR			cleaved L-S@N-term	0.0692735	1073.65	537.833	1073.58	537.799	2	9	2.1.1.2099.10	16.8523	696.36	276.35	15.84	1.14	1150.16
1	26.07	26.07	36.69	tr|A0A287NA39	Uncharacterized protein OS=Hordeum vulgare subsp. vulgare OX=112509 PE=3 SV=1	0	34.13	SLITAGAGGATR			cleaved L-S@N-term	0.0735459	1073.66	537.836	1073.58	537.799	2	10	3.1.1.2113.10	16.9485	1026.39	552.36	17.77	2.84	1402.17
1	26.07	26.07	36.69	tr|A0A287NA39	Uncharacterized protein OS=Hordeum vulgare subsp. vulgare OX=112509 PE=3 SV=1	0	33.55	SLITAGAGGATR			cleaved L-S@N-term	0.073668	1073.66	537.836	1073.58	537.799	2	11	4.1.1.2225.7	19.459	1008.37	587.87	18.76	2.84	1683.18
1	26.07	26.07	36.69	tr|A0A287NA39	Uncharacterized protein OS=Hordeum vulgare subsp. vulgare OX=112509 PE=3 SV=1	0	31.37	SLITAGAGGATR			cleaved L-S@N-term	0.073668	1073.66	537.836	1073.58	537.799	2	11	4.1.1.2209.12	17.9654	1008.37	612.49	18.76	2.84	1313.17
1	26.07	26.07	36.69	tr|A0A287NA39	Uncharacterized protein OS=Hordeum vulgare subsp. vulgare OX=112509 PE=3 SV=1	0	31.37	SLITAGAGGATR			cleaved L-S@N-term	0.073668	1073.66	537.836	1073.58	537.799	2	10	4.1.1.2227.8	19.6525	1008.37	484.96	18.76	2.84	1737.43
1	26.07	26.07	36.69	tr|A0A287NA39	Uncharacterized protein OS=Hordeum vulgare subsp. vulgare OX=112509 PE=3 SV=1	0	30.55	SLITAGAGGATR			cleaved L-S@N-term	0.0509629	1073.63	537.824	1073.58	537.799	2	10	7.1.1.5110.10	31.0372	567.35	540.44	31.18	0.57	2467.14
1	26.07	26.07	36.69	tr|A0A287NA39	Uncharacterized protein OS=Hordeum vulgare subsp. vulgare OX=112509 PE=3 SV=1	0	29.63	SLITAGAGGATR			cleaved L-S@N-term	0.0509629	1073.63	537.824	1073.58	537.799	2	12	7.1.1.5099.6	29.9824	4931.15	1858.78	29.58	0.38	6964.84
1	26.07	26.07	36.69	tr|A0A287NA39	Uncharacterized protein OS=Hordeum vulgare subsp. vulgare OX=112509 PE=3 SV=1	0	26.53	SLITAGAGGATR			cleaved L-S@N-term	0.073668	1073.66	537.836	1073.58	537.799	2	10	4.1.1.2228.8	19.747	1008.37	449.38	18.76	2.84	1674.18
1	26.07	26.07	36.69	tr|A0A287NA39	Uncharacterized protein OS=Hordeum vulgare subsp. vulgare OX=112509 PE=3 SV=1	0	26.43	SLITAGAGGATR			cleaved L-S@N-term	0.0692735	1073.65	537.833	1073.58	537.799	2	10	2.1.1.2090.9	15.9963	696.36	590.89	15.84	1.14	1179.16
1	26.07	26.07	36.69	tr|A0A287NA39	Uncharacterized protein OS=Hordeum vulgare subsp. vulgare OX=112509 PE=3 SV=1	0	26.43	SLITAGAGGATR			cleaved L-S@N-term	0.0692735	1073.65	537.833	1073.58	537.799	2	8	2.1.1.2093.7	16.2717	696.36	424.11	15.84	1.14	1461.17
1	26.07	26.07	36.69	tr|A0A287NA39	Uncharacterized protein OS=Hordeum vulgare subsp. vulgare OX=112509 PE=3 SV=1	0	26.36	SLITAGAGGATR			cleaved L-S@N-term	0.0543809	1073.64	537.826	1073.58	537.799	2	9	6.1.1.5343.9	31.5913	3387.91	776.85	30.75	0.85	2211.19
1	26.07	26.07	36.69	tr|A0A287NA39	Uncharacterized protein OS=Hordeum vulgare subsp. vulgare OX=112509 PE=3 SV=1	0	25.8	SLITAGAGGATR			cleaved L-S@N-term	0.073668	1073.66	537.836	1073.58	537.799	2	9	4.1.1.2221.11	19.097	1008.37	812.18	18.76	2.84	1828.18
1	26.07	26.07	36.69	tr|A0A287NA39	Uncharacterized protein OS=Hordeum vulgare subsp. vulgare OX=112509 PE=3 SV=1	0	25.8	SLITAGAGGATR			cleaved L-S@N-term	0.073668	1073.66	537.836	1073.58	537.799	2	10	4.1.1.2222.10	19.1876	1008.37	753.53	18.76	2.84	1771.37
1	26.07	26.07	36.69	tr|A0A287NA39	Uncharacterized protein OS=Hordeum vulgare subsp. vulgare OX=112509 PE=3 SV=1	0	25.62	SLITAGAGGATR			cleaved L-S@N-term	0.0735459	1073.66	537.836	1073.58	537.799	2	9	3.1.1.2133.10	18.8439	1026.39	502.8	17.77	2.84	2226.2
1	26.07	26.07	36.69	tr|A0A287NA39	Uncharacterized protein OS=Hordeum vulgare subsp. vulgare OX=112509 PE=3 SV=1	0	23.28	SLITAGAGGATR			cleaved L-S@N-term	0.0692735	1073.65	537.833	1073.58	537.799	2	8	2.1.1.2094.9	16.3747	696.36	383.68	15.84	1.14	1555.17
1	26.07	26.07	36.69	tr|A0A287NA39	Uncharacterized protein OS=Hordeum vulgare subsp. vulgare OX=112509 PE=3 SV=1	0	22.41	SLITAGAGGATR			cleaved L-S@N-term	0.0692735	1073.65	537.833	1073.58	537.799	2	10	2.1.1.2083.8	15.3421	696.36	486.91	15.84	1.14	954.592
1	26.07	26.07	36.69	tr|A0A287NA39	Uncharacterized protein OS=Hordeum vulgare subsp. vulgare OX=112509 PE=3 SV=1	0	22.41	SLITAGAGGATR			cleaved L-S@N-term	0.0692735	1073.65	537.833	1073.58	537.799	2	9	2.1.1.2091.8	16.0867	696.36	519.94	15.84	1.14	1223.16
1	26.07	26.07	36.69	tr|A0A287NA39	Uncharacterized protein OS=Hordeum vulgare subsp. vulgare OX=112509 PE=3 SV=1	0	20.22	SLITAGAGGATR			cleaved L-S@N-term	0.0725694	1073.66	537.835	1073.58	537.799	2	9	1.1.1.2074.10	15.4991	172.41	147.37	15.45	0.66	732.149
1	26.07	26.07	36.69	tr|A0A287NA39	Uncharacterized protein OS=Hordeum vulgare subsp. vulgare OX=112509 PE=3 SV=1	0	18.48	SLITAGAGGATR			cleaved L-S@N-term	0.073668	1073.66	537.836	1073.58	537.799	2	9	4.1.1.2224.11	19.3811	1008.37	632.07	18.76	2.84	1665.18
1	26.07	26.07	36.69	tr|A0A287NA39	Uncharacterized protein OS=Hordeum vulgare subsp. vulgare OX=112509 PE=3 SV=1	0	47.05	SLKPSFEELAVCQYK	Carbamidomethyl(C)@12		cleaved L-S@N-term	0.0950872	1797.99	600.338	1797.9	600.306	3	20	8.1.1.5495.10	40.4006	12067.3	11891.8	40.44	0.28	40078.5
1	26.07	26.07	36.69	tr|A0A287NA39	Uncharacterized protein OS=Hordeum vulgare subsp. vulgare OX=112509 PE=3 SV=1	0	99	TLEAVGQVN			cleaved N-S@C-term	0.0424548	929.524	465.769	929.482	465.748	2	10	8.1.1.5409.5	32.2509	1026.26	718.87	32.41	0.38	1355.17
1	26.07	26.07	36.69	tr|A0A287NA39	Uncharacterized protein OS=Hordeum vulgare subsp. vulgare OX=112509 PE=3 SV=1	0	99	TLEAVGQVN			cleaved N-S@C-term	0.0424548	929.524	465.769	929.482	465.748	2	12	8.1.1.5410.4	32.3414	1026.26	973.63	32.41	0.38	1858.06
1	26.07	26.07	36.69	tr|A0A287NA39	Uncharacterized protein OS=Hordeum vulgare subsp. vulgare OX=112509 PE=3 SV=1	0	99	TLEAVGQVN			cleaved N-S@C-term	0.0424548	929.524	465.769	929.482	465.748	2	11	8.1.1.5411.8	32.4528	1026.26	945.43	32.41	0.38	1722.43
1	26.07	26.07	36.69	tr|A0A287NA39	Uncharacterized protein OS=Hordeum vulgare subsp. vulgare OX=112509 PE=3 SV=1	0	99	TLEAVGQVN			cleaved N-S@C-term	0.0424548	929.524	465.769	929.482	465.748	2	11	8.1.1.5412.8	32.5473	1026.26	731.65	32.41	0.38	1436.42
1	26.07	26.07	36.69	tr|A0A287NA39	Uncharacterized protein OS=Hordeum vulgare subsp. vulgare OX=112509 PE=3 SV=1	0	99	TLEAVGQVN			cleaved N-S@C-term	0.0424548	929.524	465.769	929.482	465.748	2	9	8.1.1.5413.8	32.6413	1026.26	548.83	32.41	0.38	1135.16
1	26.07	26.07	36.69	tr|A0A287NA39	Uncharacterized protein OS=Hordeum vulgare subsp. vulgare OX=112509 PE=3 SV=1	0	99	TLEAVGQVN			cleaved N-S@C-term	0.0424548	929.524	465.769	929.482	465.748	2	10	8.1.1.5415.4	32.813	1026.26	408.67	32.41	0.38	892.154
1	26.07	26.07	36.69	tr|A0A287NA39	Uncharacterized protein OS=Hordeum vulgare subsp. vulgare OX=112509 PE=3 SV=1	0	99	TLEAVGQVN			cleaved N-S@C-term	0.0424548	929.524	465.769	929.482	465.748	2	11	8.1.1.5416.3	32.9034	1026.26	393.75	32.41	0.38	1066.16
1	26.07	26.07	36.69	tr|A0A287NA39	Uncharacterized protein OS=Hordeum vulgare subsp. vulgare OX=112509 PE=3 SV=1	0	99	TLEAVGQVN			cleaved N-S@C-term	0.0424548	929.524	465.769	929.482	465.748	2	11	8.1.1.5417.4	33.0021	1026.26	405.89	32.41	0.38	1154.16
1	26.07	26.07	36.69	tr|A0A287NA39	Uncharacterized protein OS=Hordeum vulgare subsp. vulgare OX=112509 PE=3 SV=1	0	99	TLEAVGQVN			cleaved N-S@C-term	0.0406238	929.522	465.769	929.482	465.748	2	12	6.1.1.5335.7	30.8273	1053.12	1051.17	31.04	0.85	2693.59
1	26.07	26.07	36.69	tr|A0A287NA39	Uncharacterized protein OS=Hordeum vulgare subsp. vulgare OX=112509 PE=3 SV=1	0	99	TLEAVGQVN			cleaved N-S@C-term	0.0426379	929.524	465.769	929.482	465.748	2	12	7.1.1.5097.6	29.7936	1324.62	1282.77	29.77	0.38	2640.46
1	26.07	26.07	36.69	tr|A0A287NA39	Uncharacterized protein OS=Hordeum vulgare subsp. vulgare OX=112509 PE=3 SV=1	0	99	TLEAVGQVN			cleaved N-S@C-term	0.0406238	929.522	465.769	929.482	465.748	2	11	6.1.1.5334.7	30.7327	1053.12	980.18	31.04	0.85	3130.72
1	26.07	26.07	36.69	tr|A0A287NA39	Uncharacterized protein OS=Hordeum vulgare subsp. vulgare OX=112509 PE=3 SV=1	0	99	TLEAVGQVN			cleaved N-S@C-term	0.0406238	929.522	465.769	929.482	465.748	2	10	6.1.1.5332.9	30.5519	1053.12	771.83	31.04	0.85	1903.18
1	26.07	26.07	36.69	tr|A0A287NA39	Uncharacterized protein OS=Hordeum vulgare subsp. vulgare OX=112509 PE=3 SV=1	0	99	TLEAVGQVN			cleaved N-S@C-term	0.0406238	929.522	465.769	929.482	465.748	2	12	6.1.1.5333.8	30.6422	1053.12	875.93	31.04	0.85	3126.73
1	26.07	26.07	36.69	tr|A0A287NA39	Uncharacterized protein OS=Hordeum vulgare subsp. vulgare OX=112509 PE=3 SV=1	0	99	TLEAVGQVN			cleaved N-S@C-term	0.0426379	929.524	465.769	929.482	465.748	2	12	7.1.1.5098.5	29.8838	1324.62	1103.41	29.77	0.38	2280.57
1	26.07	26.07	36.69	tr|A0A287NA39	Uncharacterized protein OS=Hordeum vulgare subsp. vulgare OX=112509 PE=3 SV=1	0	84.81	TLEAVGQVN			cleaved N-S@C-term	0.0426379	929.524	465.769	929.482	465.748	2	10	7.1.1.5100.6	30.0768	1324.62	696.83	29.77	0.38	1496.17
1	26.07	26.07	36.69	tr|A0A287NA39	Uncharacterized protein OS=Hordeum vulgare subsp. vulgare OX=112509 PE=3 SV=1	0	63.44	TLEAVGQVN			cleaved N-S@C-term	0.0426379	929.524	465.769	929.482	465.748	2	11	7.1.1.5096.6	29.699	1324.62	1180.93	29.77	0.38	2653.32
1	26.07	26.07	36.69	tr|A0A287NA39	Uncharacterized protein OS=Hordeum vulgare subsp. vulgare OX=112509 PE=3 SV=1	0	99	TLEAVGQVNSWVEQVTTGLIK				0.118719	2271.33	568.84	2271.21	568.81	4	22	7.1.1.5427.5	61.0889	5914.1	5212.15	60.97	0.47	14001
1	26.07	26.07	36.69	tr|A0A287NA39	Uncharacterized protein OS=Hordeum vulgare subsp. vulgare OX=112509 PE=3 SV=1	0	99	TLEAVGQVNSWVEQVTTGLIK				0.118719	2271.33	568.84	2271.21	568.81	4	17	7.1.1.5428.6	61.1877	5914.1	3945.86	60.97	0.47	10626.7
1	26.07	26.07	36.69	tr|A0A287NA39	Uncharacterized protein OS=Hordeum vulgare subsp. vulgare OX=112509 PE=3 SV=1	0	99	TLEAVGQVNSWVEQVTTGLIK				0.116277	2271.33	568.839	2271.21	568.81	4	19	7.1.1.5429.5	61.2779	56812	3270.68	61.72	0.28	10375.4
1	26.07	26.07	36.69	tr|A0A287NA39	Uncharacterized protein OS=Hordeum vulgare subsp. vulgare OX=112509 PE=3 SV=1	0	99	TLEAVGQVNSWVEQVTTGLIK				0.116277	2271.33	568.839	2271.21	568.81	4	19	7.1.1.5430.6	61.3768	56812	6228.06	61.72	0.28	9820.18
1	26.07	26.07	36.69	tr|A0A287NA39	Uncharacterized protein OS=Hordeum vulgare subsp. vulgare OX=112509 PE=3 SV=1	0	99	TLEAVGQVNSWVEQVTTGLIK				0.116277	2271.33	568.839	2271.21	568.81	4	20	7.1.1.5431.4	61.4632	56812	17031.9	61.72	0.28	18722.2
1	26.07	26.07	36.69	tr|A0A287NA39	Uncharacterized protein OS=Hordeum vulgare subsp. vulgare OX=112509 PE=3 SV=1	0	99	TLEAVGQVNSWVEQVTTGLIK	Cation:K(E)@13			0.109858	2309.28	578.327	2309.17	578.299	4	20	7.1.1.5432.2	61.5497	9502.37	6612.87	61.65	0.28	14598.6
1	26.07	26.07	36.69	tr|A0A287NA39	Uncharacterized protein OS=Hordeum vulgare subsp. vulgare OX=112509 PE=3 SV=1	0	99	TLEAVGQVNSWVEQVTTGLIK	Oxidation(W)@11; Cation:Na(E)@13			0.088881	2309.28	578.327	2309.19	578.304	4	23	7.1.1.5434.2	61.7395	9502.37	8367.08	61.65	0.28	21937.8
1	26.07	26.07	36.69	tr|A0A287NA39	Uncharacterized protein OS=Hordeum vulgare subsp. vulgare OX=112509 PE=3 SV=1	0	99	TLEAVGQVNSWVEQVTTGLIK	Carbamidomethyl@N-term			0.115077	2328.35	583.094	2328.23	583.065	4	18	7.1.1.5434.3	61.7437	3565.46	3200.96	61.72	0.28	13416.5
1	26.07	26.07	36.69	tr|A0A287NA39	Uncharacterized protein OS=Hordeum vulgare subsp. vulgare OX=112509 PE=3 SV=1	0	99	TLEAVGQVNSWVEQVTTGLIK	Cation:K(E)@13			0.109858	2309.28	578.327	2309.17	578.299	4	16	7.1.1.5435.2	61.834	9502.37	5167.9	61.65	0.28	14006
1	26.07	26.07	36.69	tr|A0A287NA39	Uncharacterized protein OS=Hordeum vulgare subsp. vulgare OX=112509 PE=3 SV=1	0	99	TLEAVGQVNSWVEQVTTGLIK	Oxidation(W)@11; Cation:Na(E)@13			0.088881	2309.28	578.327	2309.19	578.304	4	23	6.1.1.5658.4	61.6007	6037.1	5826.54	61.45	0.57	25264.1
1	26.07	26.07	36.69	tr|A0A287NA39	Uncharacterized protein OS=Hordeum vulgare subsp. vulgare OX=112509 PE=3 SV=1	0	99	TLEAVGQVNSWVEQVTTGLIK	Carbamidomethyl@N-term			0.140054	2328.37	777.131	2328.23	777.085	3	22	6.1.1.5658.14	61.6423	10082.8	10008.3	61.64	0.85	37137.3
1	26.07	26.07	36.69	tr|A0A287NA39	Uncharacterized protein OS=Hordeum vulgare subsp. vulgare OX=112509 PE=3 SV=1	0	99	TLEAVGQVNSWVEQVTTGLIK	Cation:K(E)@13			0.109858	2309.28	578.327	2309.17	578.299	4	19	6.1.1.5659.3	61.6902	6037.1	5656.28	61.45	0.57	20430.8
1	26.07	26.07	36.69	tr|A0A287NA39	Uncharacterized protein OS=Hordeum vulgare subsp. vulgare OX=112509 PE=3 SV=1	0	99	TLEAVGQVNSWVEQVTTGLIK	Cation:K(E)@3			0.109858	2309.28	578.327	2309.17	578.299	4	19	6.1.1.5659.3	61.6902	6037.1	5656.28	61.45	0.57	20430.8
1	26.07	26.07	36.69	tr|A0A287NA39	Uncharacterized protein OS=Hordeum vulgare subsp. vulgare OX=112509 PE=3 SV=1	0	99	TLEAVGQVNSWVEQVTTGLIK	Carbamidomethyl@N-term			0.140054	2328.37	777.131	2328.23	777.085	3	21	6.1.1.5660.11	61.8174	10082.8	8047.41	61.64	0.85	24469.9
1	26.07	26.07	36.69	tr|A0A287NA39	Uncharacterized protein OS=Hordeum vulgare subsp. vulgare OX=112509 PE=3 SV=1	0	99	TLEAVGQVNSWVEQVTTGLIK	Carbamidomethyl@N-term			0.140054	2328.37	777.131	2328.23	777.085	3	19	6.1.1.5661.13	61.9199	10082.8	6566.41	61.64	0.85	18460.7
1	26.07	26.07	36.69	tr|A0A287NA39	Uncharacterized protein OS=Hordeum vulgare subsp. vulgare OX=112509 PE=3 SV=1	0	99	TLEAVGQVNSWVEQVTTGLIK	Carbamidomethyl@N-term			0.129434	2328.36	777.128	2328.23	777.085	3	22	5.1.1.6523.15	63.9709	6350.16	6169.54	63.9	0.57	29217
1	26.07	26.07	36.69	tr|A0A287NA39	Uncharacterized protein OS=Hordeum vulgare subsp. vulgare OX=112509 PE=3 SV=1	0	99	TLEAVGQVNSWVEQVTTGLIK				0.136982	2271.35	758.123	2271.21	758.078	3	23	5.1.1.6532.11	64.8072	67494.6	5861.63	63.92	0.57	37079.5
1	26.07	26.07	36.69	tr|A0A287NA39	Uncharacterized protein OS=Hordeum vulgare subsp. vulgare OX=112509 PE=3 SV=1	0	99	TLEAVGQVNSWVEQVTTGLIK				0.136982	2271.35	758.123	2271.21	758.078	3	22	5.1.1.6528.13	64.4365	67494.6	20833.1	63.92	0.57	36709
1	26.07	26.07	36.69	tr|A0A287NA39	Uncharacterized protein OS=Hordeum vulgare subsp. vulgare OX=112509 PE=3 SV=1	0	99	TLEAVGQVNSWVEQVTTGLIK				0.136982	2271.35	758.123	2271.21	758.078	3	21	5.1.1.6529.10	64.5186	67494.6	12822.2	63.92	0.57	32794.1
1	26.07	26.07	36.69	tr|A0A287NA39	Uncharacterized protein OS=Hordeum vulgare subsp. vulgare OX=112509 PE=3 SV=1	0	99	TLEAVGQVNSWVEQVTTGLIK				-0.000234148	2271.21	758.078	2271.21	758.078	3	21	7.1.1.5586.21	76.2103	2674.22	2212.51	76.12	2.37	22419.5
1	26.07	26.07	36.69	tr|A0A287NA39	Uncharacterized protein OS=Hordeum vulgare subsp. vulgare OX=112509 PE=3 SV=1	0	99	TLEAVGQVNSWVEQVTTGLIK				0.160615	2271.37	1136.69	2271.21	1136.61	2	21	8.1.1.5728.21	62.5486	120596	3771.22	61.89	0.38	14752.3
1	26.07	26.07	36.69	tr|A0A287NA39	Uncharacterized protein OS=Hordeum vulgare subsp. vulgare OX=112509 PE=3 SV=1	0	99	TLEAVGQVNSWVEQVTTGLIK				-0.00224812	2271.21	758.077	2271.21	758.078	3	22	7.1.1.5514.18	69.3702	3298.89	3296.07	69.29	0.95	27883.2
1	26.07	26.07	36.69	tr|A0A287NA39	Uncharacterized protein OS=Hordeum vulgare subsp. vulgare OX=112509 PE=3 SV=1	0	99	TLEAVGQVNSWVEQVTTGLIK				-0.000234148	2271.21	758.078	2271.21	758.078	3	24	7.1.1.5533.19	71.1752	3427.52	3424.87	71.1	0.76	30448.3
1	26.07	26.07	36.69	tr|A0A287NA39	Uncharacterized protein OS=Hordeum vulgare subsp. vulgare OX=112509 PE=3 SV=1	0	99	TLEAVGQVNSWVEQVTTGLIK	Deamidated(N)@9			-0.0180935	2272.18	758.4	2272.2	758.406	3	22	7.1.1.5565.18	74.2065	2293.63	2230.62	73.84	1.61	26730.2
1	26.07	26.07	36.69	tr|A0A287NA39	Uncharacterized protein OS=Hordeum vulgare subsp. vulgare OX=112509 PE=3 SV=1	0	99	TLEAVGQVNSWVEQVTTGLIK	Oxidation(W)@11; Cation:Na(E)@13			0.094252	2309.28	578.328	2309.19	578.304	4	21	8.1.1.5721.5	61.8197	5748.5	5708.74	61.89	0.28	18358.9
1	26.07	26.07	36.69	tr|A0A287NA39	Uncharacterized protein OS=Hordeum vulgare subsp. vulgare OX=112509 PE=3 SV=1	0	99	TLEAVGQVNSWVEQVTTGLIK				0.107078	2271.32	455.271	2271.21	455.249	5	16	8.1.1.5723.2	61.996	1368.32	1294.82	61.97	0.19	11129
1	26.07	26.07	36.69	tr|A0A287NA39	Uncharacterized protein OS=Hordeum vulgare subsp. vulgare OX=112509 PE=3 SV=1	0	99	TLEAVGQVNSWVEQVTTGLIK				0.139362	2271.35	758.124	2271.21	758.078	3	24	8.1.1.5729.9	62.593	231602	12496.2	61.89	0.38	58189.9
1	26.07	26.07	36.69	tr|A0A287NA39	Uncharacterized protein OS=Hordeum vulgare subsp. vulgare OX=112509 PE=3 SV=1	0	99	TLEAVGQVNSWVEQVTTGLIK				-0.00143517	2271.21	758.077	2271.21	758.078	3	21	6.1.1.5829.18	77.8442	2141.8	1500.01	75.59	3.41	23507.6
1	26.07	26.07	36.69	tr|A0A287NA39	Uncharacterized protein OS=Hordeum vulgare subsp. vulgare OX=112509 PE=3 SV=1	0	99	TLEAVGQVNSWVEQVTTGLIK	Deamidated(N)@9			0.00845426	2272.2	758.408	2272.2	758.406	3	23	7.1.1.5441.11	62.4384	11942.9	4869.2	63.05	0.38	43449.4
1	26.07	26.07	36.69	tr|A0A287NA39	Uncharacterized protein OS=Hordeum vulgare subsp. vulgare OX=112509 PE=3 SV=1	0	99	TLEAVGQVNSWVEQVTTGLIK	Deamidated(N)@9			0.00845426	2272.2	758.408	2272.2	758.406	3	24	7.1.1.5448.12	63.1043	11942.9	11465.8	63.05	0.38	56342.3
1	26.07	26.07	36.69	tr|A0A287NA39	Uncharacterized protein OS=Hordeum vulgare subsp. vulgare OX=112509 PE=3 SV=1	0	99	TLEAVGQVNSWVEQVTTGLIK				-0.000783412	2271.21	758.077	2271.21	758.078	3	22	7.1.1.5499.16	67.9405	3389.93	3030.21	67.68	1.23	27457.5
1	26.07	26.07	36.69	tr|A0A287NA39	Uncharacterized protein OS=Hordeum vulgare subsp. vulgare OX=112509 PE=3 SV=1	0	99	TLEAVGQVNSWVEQVTTGLIK				-0.000783412	2271.21	758.077	2271.21	758.078	3	20	7.1.1.5500.17	68.0395	3389.93	2979.88	67.68	1.23	27053.7
1	26.07	26.07	36.69	tr|A0A287NA39	Uncharacterized protein OS=Hordeum vulgare subsp. vulgare OX=112509 PE=3 SV=1	0	99	TLEAVGQVNSWVEQVTTGLIK				-0.000783412	2271.21	758.077	2271.21	758.078	3	21	7.1.1.5503.15	68.3155	3389.93	2492.85	67.68	1.23	27114.7
1	26.07	26.07	36.69	tr|A0A287NA39	Uncharacterized protein OS=Hordeum vulgare subsp. vulgare OX=112509 PE=3 SV=1	0	99	TLEAVGQVNSWVEQVTTGLIK				-0.00224812	2271.21	758.077	2271.21	758.078	3	20	7.1.1.5512.18	69.1806	3298.89	3124.23	69.29	0.95	28334.7
1	26.07	26.07	36.69	tr|A0A287NA39	Uncharacterized protein OS=Hordeum vulgare subsp. vulgare OX=112509 PE=3 SV=1	0	99	TLEAVGQVNSWVEQVTTGLIK				-0.00133268	2271.21	758.077	2271.21	758.078	3	21	7.1.1.5523.18	70.2234	3157.59	3119.16	70.43	1.14	26538.9
1	26.07	26.07	36.69	tr|A0A287NA39	Uncharacterized protein OS=Hordeum vulgare subsp. vulgare OX=112509 PE=3 SV=1	0	99	TLEAVGQVNSWVEQVTTGLIK				-0.00444518	2271.21	758.076	2271.21	758.078	3	20	7.1.1.5539.17	71.7355	3400.91	3178.57	71.85	0.95	26890.5
1	26.07	26.07	36.69	tr|A0A287NA39	Uncharacterized protein OS=Hordeum vulgare subsp. vulgare OX=112509 PE=3 SV=1	0	99	TLEAVGQVNSWVEQVTTGLIK				-0.00444518	2271.21	758.076	2271.21	758.078	3	21	7.1.1.5543.18	72.1193	3400.91	2724.09	71.85	0.95	31137.1
1	26.07	26.07	36.69	tr|A0A287NA39	Uncharacterized protein OS=Hordeum vulgare subsp. vulgare OX=112509 PE=3 SV=1	0	99	TLEAVGQVNSWVEQVTTGLIK				-0.00444518	2271.21	758.076	2271.21	758.078	3	20	7.1.1.5543.19	72.1235	3400.91	2716.83	71.85	0.95	24607.1
1	26.07	26.07	36.69	tr|A0A287NA39	Uncharacterized protein OS=Hordeum vulgare subsp. vulgare OX=112509 PE=3 SV=1	0	99	TLEAVGQVNSWVEQVTTGLIK	Deamidated(N)@9			-0.0195582	2272.18	758.399	2272.2	758.406	3	21	7.1.1.5551.18	72.8783	2480.44	2378.34	72.8	1.33	26870
1	26.07	26.07	36.69	tr|A0A287NA39	Uncharacterized protein OS=Hordeum vulgare subsp. vulgare OX=112509 PE=3 SV=1	0	99	TLEAVGQVNSWVEQVTTGLIK				-0.00352973	2271.21	758.077	2271.21	758.078	3	21	7.1.1.5558.17	73.5382	2760.68	2615.41	73.56	1.14	24969.9
1	26.07	26.07	36.69	tr|A0A287NA39	Uncharacterized protein OS=Hordeum vulgare subsp. vulgare OX=112509 PE=3 SV=1	0	99	TLEAVGQVNSWVEQVTTGLIK	Deamidated(Q)@14			-0.0180935	2272.18	758.4	2272.2	758.406	3	21	7.1.1.5574.19	75.0645	2293.63	1917.06	73.84	1.61	24641.9
1	26.07	26.07	36.69	tr|A0A287NA39	Uncharacterized protein OS=Hordeum vulgare subsp. vulgare OX=112509 PE=3 SV=1	0	99	TLEAVGQVNSWVEQVTTGLIK				-0.000234148	2271.21	758.078	2271.21	758.078	3	20	7.1.1.5583.18	75.9132	2674.22	2648.92	76.12	2.37	23608
1	26.07	26.07	36.69	tr|A0A287NA39	Uncharacterized protein OS=Hordeum vulgare subsp. vulgare OX=112509 PE=3 SV=1	0	99	TLEAVGQVNSWVEQVTTGLIK				-0.000234148	2271.21	758.078	2271.21	758.078	3	20	7.1.1.5585.17	76.0988	2674.22	2520.28	76.12	2.37	22298.6
1	26.07	26.07	36.69	tr|A0A287NA39	Uncharacterized protein OS=Hordeum vulgare subsp. vulgare OX=112509 PE=3 SV=1	0	99	TLEAVGQVNSWVEQVTTGLIK				-0.000234148	2271.21	758.078	2271.21	758.078	3	19	7.1.1.5600.18	77.526	2674.22	1575.15	76.12	2.37	20835.3
1	26.07	26.07	36.69	tr|A0A287NA39	Uncharacterized protein OS=Hordeum vulgare subsp. vulgare OX=112509 PE=3 SV=1	0	99	TLEAVGQVNSWVEQVTTGLIK				0.00196291	2271.21	758.078	2271.21	758.078	3	18	7.1.1.5606.17	78.0915	1736.2	1715.36	78.11	0.95	20259
1	26.07	26.07	36.69	tr|A0A287NA39	Uncharacterized protein OS=Hordeum vulgare subsp. vulgare OX=112509 PE=3 SV=1	0	99	TLEAVGQVNSWVEQVTTGLIK				0.00196291	2271.21	758.078	2271.21	758.078	3	18	7.1.1.5607.21	78.203	1736.2	1639.22	78.11	0.95	20606.2
1	26.07	26.07	36.69	tr|A0A287NA39	Uncharacterized protein OS=Hordeum vulgare subsp. vulgare OX=112509 PE=3 SV=1	0	99	TLEAVGQVNSWVEQVTTGLIK	Deamidated(N)@9			-0.0182766	2272.18	758.399	2272.2	758.406	3	19	7.1.1.5610.18	78.4753	1886.84	1760.27	78.4	1.23	20080.9
1	26.07	26.07	36.69	tr|A0A287NA39	Uncharacterized protein OS=Hordeum vulgare subsp. vulgare OX=112509 PE=3 SV=1	0	99	TLEAVGQVNSWVEQVTTGLIK	Cation:K(E)@13			0.0978955	2309.26	578.323	2309.17	578.299	4	15	5.1.1.6522.3	63.8263	1220.43	1220.43	63.76	0.57	12134.8
1	26.07	26.07	36.69	tr|A0A287NA39	Uncharacterized protein OS=Hordeum vulgare subsp. vulgare OX=112509 PE=3 SV=1	0	99	TLEAVGQVNSWVEQVTTGLIK				0.00112812	2271.21	758.078	2271.21	758.078	3	21	6.1.1.5799.19	75.0046	2262.79	2063.63	74.43	1.71	25849.2
1	26.07	26.07	36.69	tr|A0A287NA39	Uncharacterized protein OS=Hordeum vulgare subsp. vulgare OX=112509 PE=3 SV=1	0	98.77	TLEAVGQVNSWVEQVTTGLIK	Carbamidomethyl@N-term			0.129434	2328.36	777.128	2328.23	777.085	3	20	5.1.1.6522.15	63.8762	6350.16	6284.19	63.9	0.57	34928.7
1	26.07	26.07	36.69	tr|A0A287NA39	Uncharacterized protein OS=Hordeum vulgare subsp. vulgare OX=112509 PE=3 SV=1	0	98.74	TLEAVGQVNSWVEQVTTGLIK				-0.00224812	2271.21	758.077	2271.21	758.078	3	19	7.1.1.5510.15	68.9785	3298.89	2969.26	69.29	0.95	27800.2
1	26.07	26.07	36.69	tr|A0A287NA39	Uncharacterized protein OS=Hordeum vulgare subsp. vulgare OX=112509 PE=3 SV=1	0	98.74	TLEAVGQVNSWVEQVTTGLIK				-0.00224812	2271.21	758.077	2271.21	758.078	3	18	7.1.1.5516.17	69.5555	3298.89	2860.13	69.29	0.95	26677.7
1	26.07	26.07	36.69	tr|A0A287NA39	Uncharacterized protein OS=Hordeum vulgare subsp. vulgare OX=112509 PE=3 SV=1	0	98.74	TLEAVGQVNSWVEQVTTGLIK				-0.00133268	2271.21	758.077	2271.21	758.078	3	21	7.1.1.5524.18	70.3182	3157.59	3089.59	70.43	1.14	33394.1
1	26.07	26.07	36.69	tr|A0A287NA39	Uncharacterized protein OS=Hordeum vulgare subsp. vulgare OX=112509 PE=3 SV=1	0	98.74	TLEAVGQVNSWVEQVTTGLIK	Deamidated(Q)@14			-0.0180935	2272.18	758.4	2272.2	758.406	3	20	7.1.1.5572.17	74.8663	2293.63	1968.59	73.84	1.61	24930.4
1	26.07	26.07	36.69	tr|A0A287NA39	Uncharacterized protein OS=Hordeum vulgare subsp. vulgare OX=112509 PE=3 SV=1	0	98.74	TLEAVGQVNSWVEQVTTGLIK				-0.000234148	2271.21	758.078	2271.21	758.078	3	21	7.1.1.5585.15	76.0905	2674.22	2529.99	76.12	2.37	29219.5
1	26.07	26.07	36.69	tr|A0A287NA39	Uncharacterized protein OS=Hordeum vulgare subsp. vulgare OX=112509 PE=3 SV=1	0	98.74	TLEAVGQVNSWVEQVTTGLIK				-0.000234148	2271.21	758.078	2271.21	758.078	3	19	7.1.1.5594.19	76.961	2674.22	1700.47	76.12	2.37	21149
1	26.07	26.07	36.69	tr|A0A287NA39	Uncharacterized protein OS=Hordeum vulgare subsp. vulgare OX=112509 PE=3 SV=1	0	98.74	TLEAVGQVNSWVEQVTTGLIK				-0.000234148	2271.21	758.078	2271.21	758.078	3	21	7.1.1.5598.17	77.332	2674.22	1679.13	76.12	2.37	26216.4
1	26.07	26.07	36.69	tr|A0A287NA39	Uncharacterized protein OS=Hordeum vulgare subsp. vulgare OX=112509 PE=3 SV=1	0	98.74	TLEAVGQVNSWVEQVTTGLIK				-0.000234148	2271.21	758.078	2271.21	758.078	3	19	7.1.1.5613.18	78.7599	1874.13	1751.75	78.87	0.76	19628
1	26.07	26.07	36.69	tr|A0A287NA39	Uncharacterized protein OS=Hordeum vulgare subsp. vulgare OX=112509 PE=3 SV=1	0	97.59	TLEAVGQVNSWVEQVTTGLIK	Cation:K(E)@13			0.115229	2309.28	578.328	2309.17	578.299	4	18	8.1.1.5722.6	61.9184	5748.5	5267.36	61.89	0.28	17835.4
1	26.07	26.07	36.69	tr|A0A287NA39	Uncharacterized protein OS=Hordeum vulgare subsp. vulgare OX=112509 PE=3 SV=1	0	97.59	TLEAVGQVNSWVEQVTTGLIK	Carbamidomethyl@N-term			0.136026	2328.37	777.13	2328.23	777.085	3	22	8.1.1.5722.15	61.9559	20188.4	16637.2	61.8	0.47	46138.8
1	26.07	26.07	36.69	tr|A0A287NA39	Uncharacterized protein OS=Hordeum vulgare subsp. vulgare OX=112509 PE=3 SV=1	0	96.76	TLEAVGQVNSWVEQVTTGLIK				0.136982	2271.35	758.123	2271.21	758.078	3	21	5.1.1.6527.14	64.3461	67494.6	36784.6	63.92	0.57	43132.9
1	26.07	26.07	36.69	tr|A0A287NA39	Uncharacterized protein OS=Hordeum vulgare subsp. vulgare OX=112509 PE=3 SV=1	0	96.74	TLEAVGQVNSWVEQVTTGLIK				-0.00143517	2271.21	758.077	2271.21	758.078	3	20	6.1.1.5800.19	75.0993	2141.8	1880.86	75.59	3.41	25524.3
1	26.07	26.07	36.69	tr|A0A287NA39	Uncharacterized protein OS=Hordeum vulgare subsp. vulgare OX=112509 PE=3 SV=1	0	96.74	TLEAVGQVNSWVEQVTTGLIK				-0.00143517	2271.21	758.077	2271.21	758.078	3	21	6.1.1.5808.16	75.8448	2141.8	2086.98	75.59	3.41	25758.4
1	26.07	26.07	36.69	tr|A0A287NA39	Uncharacterized protein OS=Hordeum vulgare subsp. vulgare OX=112509 PE=3 SV=1	0	96.74	TLEAVGQVNSWVEQVTTGLIK				-0.00143517	2271.21	758.077	2271.21	758.078	3	20	6.1.1.5819.17	76.8918	2141.8	1819.22	75.59	3.41	25348.9
1	26.07	26.07	36.69	tr|A0A287NA39	Uncharacterized protein OS=Hordeum vulgare subsp. vulgare OX=112509 PE=3 SV=1	0	96.53	TLEAVGQVNSWVEQVTTGLIK				-0.000783412	2271.21	758.077	2271.21	758.078	3	22	7.1.1.5497.16	67.7511	3389.93	3185.11	67.68	1.23	30912.8
1	26.07	26.07	36.69	tr|A0A287NA39	Uncharacterized protein OS=Hordeum vulgare subsp. vulgare OX=112509 PE=3 SV=1	0	96.53	TLEAVGQVNSWVEQVTTGLIK				-0.000783412	2271.21	758.077	2271.21	758.078	3	20	7.1.1.5498.15	67.8418	3389.93	3239.33	67.68	1.23	28366.1
1	26.07	26.07	36.69	tr|A0A287NA39	Uncharacterized protein OS=Hordeum vulgare subsp. vulgare OX=112509 PE=3 SV=1	0	96.53	TLEAVGQVNSWVEQVTTGLIK	Deamidated(N)@9			-0.00820676	2272.19	758.403	2272.2	758.406	3	21	7.1.1.5507.14	68.69	2622.92	2548.33	68.63	0.76	26507.6
1	26.07	26.07	36.69	tr|A0A287NA39	Uncharacterized protein OS=Hordeum vulgare subsp. vulgare OX=112509 PE=3 SV=1	0	96.53	TLEAVGQVNSWVEQVTTGLIK				-0.000234148	2271.21	758.078	2271.21	758.078	3	19	7.1.1.5537.18	71.55	3427.52	2562.62	71.1	0.76	27555.5
1	26.07	26.07	36.69	tr|A0A287NA39	Uncharacterized protein OS=Hordeum vulgare subsp. vulgare OX=112509 PE=3 SV=1	0	96.53	TLEAVGQVNSWVEQVTTGLIK				-0.00444518	2271.21	758.076	2271.21	758.078	3	20	7.1.1.5538.18	71.6449	3400.91	2907.57	71.85	0.95	27399
1	26.07	26.07	36.69	tr|A0A287NA39	Uncharacterized protein OS=Hordeum vulgare subsp. vulgare OX=112509 PE=3 SV=1	0	96.53	TLEAVGQVNSWVEQVTTGLIK				-0.00352973	2271.21	758.077	2271.21	758.078	3	20	7.1.1.5558.16	73.534	2760.68	2587.58	73.56	1.14	30699.8
1	26.07	26.07	36.69	tr|A0A287NA39	Uncharacterized protein OS=Hordeum vulgare subsp. vulgare OX=112509 PE=3 SV=1	0	96.53	TLEAVGQVNSWVEQVTTGLIK				-0.00352973	2271.21	758.077	2271.21	758.078	3	19	7.1.1.5568.17	74.487	2609.62	2180.06	73.56	1.42	23817.3
1	26.07	26.07	36.69	tr|A0A287NA39	Uncharacterized protein OS=Hordeum vulgare subsp. vulgare OX=112509 PE=3 SV=1	0	96.53	TLEAVGQVNSWVEQVTTGLIK				-0.000234148	2271.21	758.078	2271.21	758.078	3	19	7.1.1.5578.16	75.431	2674.22	2052.27	76.12	2.37	29572.5
1	26.07	26.07	36.69	tr|A0A287NA39	Uncharacterized protein OS=Hordeum vulgare subsp. vulgare OX=112509 PE=3 SV=1	0	96.53	TLEAVGQVNSWVEQVTTGLIK				-0.000234148	2271.21	758.078	2271.21	758.078	3	21	7.1.1.5583.16	75.9049	2674.22	2636.92	76.12	2.37	31717.1
1	26.07	26.07	36.69	tr|A0A287NA39	Uncharacterized protein OS=Hordeum vulgare subsp. vulgare OX=112509 PE=3 SV=1	0	96.53	TLEAVGQVNSWVEQVTTGLIK				-0.000234148	2271.21	758.078	2271.21	758.078	3	19	7.1.1.5586.19	76.2019	2674.22	2238.75	76.12	2.37	27483
1	26.07	26.07	36.69	tr|A0A287NA39	Uncharacterized protein OS=Hordeum vulgare subsp. vulgare OX=112509 PE=3 SV=1	0	96.53	TLEAVGQVNSWVEQVTTGLIK	Deamidated(Q)@14			-0.0140656	2272.18	758.401	2272.2	758.406	3	20	7.1.1.5590.16	76.5688	2120.58	1883.04	75.93	1.8	22386.1
1	26.07	26.07	36.69	tr|A0A287NA39	Uncharacterized protein OS=Hordeum vulgare subsp. vulgare OX=112509 PE=3 SV=1	0	96.53	TLEAVGQVNSWVEQVTTGLIK	Deamidated(Q)@14			-0.0140656	2272.18	758.401	2272.2	758.406	3	19	7.1.1.5591.20	76.6803	2120.58	1865.16	75.93	1.8	22114.5
1	26.07	26.07	36.69	tr|A0A287NA39	Uncharacterized protein OS=Hordeum vulgare subsp. vulgare OX=112509 PE=3 SV=1	0	96.53	TLEAVGQVNSWVEQVTTGLIK				-0.000234148	2271.21	758.078	2271.21	758.078	3	19	7.1.1.5596.17	77.1423	2674.22	1692.87	76.12	2.37	27579.2
1	26.07	26.07	36.69	tr|A0A287NA39	Uncharacterized protein OS=Hordeum vulgare subsp. vulgare OX=112509 PE=3 SV=1	0	96.53	TLEAVGQVNSWVEQVTTGLIK				-0.000234148	2271.21	758.078	2271.21	758.078	3	20	7.1.1.5599.17	77.4269	2674.22	1676.15	76.12	2.37	25774.7
1	26.07	26.07	36.69	tr|A0A287NA39	Uncharacterized protein OS=Hordeum vulgare subsp. vulgare OX=112509 PE=3 SV=1	0	96.53	TLEAVGQVNSWVEQVTTGLIK				-0.000234148	2271.21	758.078	2271.21	758.078	3	18	7.1.1.5599.18	77.431	2674.22	1676.9	76.12	2.37	20626
1	26.07	26.07	36.69	tr|A0A287NA39	Uncharacterized protein OS=Hordeum vulgare subsp. vulgare OX=112509 PE=3 SV=1	0	96.11	TLEAVGQVNSWVEQVTTGLIK				0.107078	2271.32	455.271	2271.21	455.249	5	16	8.1.1.5722.2	61.9017	1368.32	1294.66	61.97	0.19	16115.9
1	26.07	26.07	36.69	tr|A0A287NA39	Uncharacterized protein OS=Hordeum vulgare subsp. vulgare OX=112509 PE=3 SV=1	0	93.74	TLEAVGQVNSWVEQVTTGLIK				0.139362	2271.35	758.124	2271.21	758.078	3	23	8.1.1.5733.12	62.9843	231602	9669.56	61.89	0.38	50948.7
1	26.07	26.07	36.69	tr|A0A287NA39	Uncharacterized protein OS=Hordeum vulgare subsp. vulgare OX=112509 PE=3 SV=1	0	92.61	TLEAVGQVNSWVEQVTTGLIK	Deamidated(N)@9			-0.0146956	2272.18	758.401	2272.2	758.406	3	20	6.1.1.5705.18	66.0958	2907.87	2308.13	65.36	1.7	28091.2
1	26.07	26.07	36.69	tr|A0A287NA39	Uncharacterized protein OS=Hordeum vulgare subsp. vulgare OX=112509 PE=3 SV=1	0	92.61	TLEAVGQVNSWVEQVTTGLIK				-0.000885892	2271.21	758.077	2271.21	758.078	3	22	6.1.1.5719.17	67.4148	3209.41	3069.73	67.63	2.55	34842.2
1	26.07	26.07	36.69	tr|A0A287NA39	Uncharacterized protein OS=Hordeum vulgare subsp. vulgare OX=112509 PE=3 SV=1	0	92.61	TLEAVGQVNSWVEQVTTGLIK	Deamidated(N)@9			-0.00993522	2272.19	758.402	2272.2	758.406	3	20	6.1.1.5738.18	69.2181	4276.91	2361.37	70.75	3.7	30601.1
1	26.07	26.07	36.69	tr|A0A287NA39	Uncharacterized protein OS=Hordeum vulgare subsp. vulgare OX=112509 PE=3 SV=1	0	92.61	TLEAVGQVNSWVEQVTTGLIK	Deamidated(N)@9			-0.00993522	2272.19	758.402	2272.2	758.406	3	22	6.1.1.5770.19	72.2543	4276.91	2223.1	70.75	3.7	29094.8
1	26.07	26.07	36.69	tr|A0A287NA39	Uncharacterized protein OS=Hordeum vulgare subsp. vulgare OX=112509 PE=3 SV=1	0	92.61	TLEAVGQVNSWVEQVTTGLIK				0.00112812	2271.21	758.078	2271.21	758.078	3	20	6.1.1.5788.18	73.9574	2262.79	2200.59	74.43	1.71	27214
1	26.07	26.07	36.69	tr|A0A287NA39	Uncharacterized protein OS=Hordeum vulgare subsp. vulgare OX=112509 PE=3 SV=1	0	92.61	TLEAVGQVNSWVEQVTTGLIK				-0.00143517	2271.21	758.077	2271.21	758.078	3	20	6.1.1.5820.18	76.9911	2141.8	1759.02	75.59	3.41	30524.6
1	26.07	26.07	36.69	tr|A0A287NA39	Uncharacterized protein OS=Hordeum vulgare subsp. vulgare OX=112509 PE=3 SV=1	0	91.66	TLEAVGQVNSWVEQVTTGLIK	Carbamidomethyl@N-term			0.129434	2328.36	777.128	2328.23	777.085	3	22	5.1.1.6521.17	63.7899	6350.16	6094.56	63.9	0.57	34862.9
1	26.07	26.07	36.69	tr|A0A287NA39	Uncharacterized protein OS=Hordeum vulgare subsp. vulgare OX=112509 PE=3 SV=1	0	90.75	TLEAVGQVNSWVEQVTTGLIK	Deamidated(N)@9			0.00845426	2272.2	758.408	2272.2	758.406	3	23	7.1.1.5447.11	63.0054	11942.9	10967.4	63.05	0.38	58163.9
1	26.07	26.07	36.69	tr|A0A287NA39	Uncharacterized protein OS=Hordeum vulgare subsp. vulgare OX=112509 PE=3 SV=1	0	90.75	TLEAVGQVNSWVEQVTTGLIK	Deamidated(Q)@7			-0.0180935	2272.18	758.4	2272.2	758.406	3	20	7.1.1.5570.17	74.6767	2371.16	1975.16	73.85	1.52	23770.8
1	26.07	26.07	36.69	tr|A0A287NA39	Uncharacterized protein OS=Hordeum vulgare subsp. vulgare OX=112509 PE=3 SV=1	0	90.75	TLEAVGQVNSWVEQVTTGLIK				-0.000234148	2271.21	758.078	2271.21	758.078	3	19	7.1.1.5576.19	75.2538	2674.22	2055.74	76.12	2.37	23786.3
1	26.07	26.07	36.69	tr|A0A287NA39	Uncharacterized protein OS=Hordeum vulgare subsp. vulgare OX=112509 PE=3 SV=1	0	90.75	TLEAVGQVNSWVEQVTTGLIK				-0.000234148	2271.21	758.078	2271.21	758.078	3	20	7.1.1.5582.17	75.8141	2674.22	2519.59	76.12	2.37	23917.4
1	26.07	26.07	36.69	tr|A0A287NA39	Uncharacterized protein OS=Hordeum vulgare subsp. vulgare OX=112509 PE=3 SV=1	0	90.75	TLEAVGQVNSWVEQVTTGLIK				-0.000234148	2271.21	758.078	2271.21	758.078	3	19	7.1.1.5584.19	76.0123	2674.22	2615.2	76.12	2.37	31167.8
1	26.07	26.07	36.69	tr|A0A287NA39	Uncharacterized protein OS=Hordeum vulgare subsp. vulgare OX=112509 PE=3 SV=1	0	90.75	TLEAVGQVNSWVEQVTTGLIK				0.00196291	2271.21	758.078	2271.21	758.078	3	19	7.1.1.5607.20	78.1988	1736.2	1643.6	78.11	0.95	25564.2
1	26.07	26.07	36.69	tr|A0A287NA39	Uncharacterized protein OS=Hordeum vulgare subsp. vulgare OX=112509 PE=3 SV=1	0	84	TLEAVGQVNSWVEQVTTGLIK	Deamidated(N)@9			-0.0146956	2272.18	758.401	2272.2	758.406	3	18	6.1.1.5697.15	65.3264	2907.87	2889.91	65.36	1.7	29360.8
1	26.07	26.07	36.69	tr|A0A287NA39	Uncharacterized protein OS=Hordeum vulgare subsp. vulgare OX=112509 PE=3 SV=1	0	84	TLEAVGQVNSWVEQVTTGLIK	Deamidated(N)@9			-0.0201884	2272.18	758.399	2272.2	758.406	3	21	6.1.1.5713.14	66.8348	3941	2621.38	67.89	2.27	28962
1	26.07	26.07	36.69	tr|A0A287NA39	Uncharacterized protein OS=Hordeum vulgare subsp. vulgare OX=112509 PE=3 SV=1	0	84	TLEAVGQVNSWVEQVTTGLIK				-0.000885892	2271.21	758.077	2271.21	758.078	3	20	6.1.1.5731.14	68.5392	3209.41	2472.54	67.63	2.55	29321.5
1	26.07	26.07	36.69	tr|A0A287NA39	Uncharacterized protein OS=Hordeum vulgare subsp. vulgare OX=112509 PE=3 SV=1	0	84	TLEAVGQVNSWVEQVTTGLIK	Deamidated(N)@9			-0.00993522	2272.19	758.402	2272.2	758.406	3	20	6.1.1.5747.19	70.0746	4276.91	2662.26	70.75	3.7	30116.8
1	26.07	26.07	36.69	tr|A0A287NA39	Uncharacterized protein OS=Hordeum vulgare subsp. vulgare OX=112509 PE=3 SV=1	0	84	TLEAVGQVNSWVEQVTTGLIK	Deamidated(N)@9			-0.00993522	2272.19	758.402	2272.2	758.406	3	18	6.1.1.5775.18	72.7244	4276.91	2407.44	70.75	3.7	26963
1	26.07	26.07	36.69	tr|A0A287NA39	Uncharacterized protein OS=Hordeum vulgare subsp. vulgare OX=112509 PE=3 SV=1	0	84	TLEAVGQVNSWVEQVTTGLIK				0.00112812	2271.21	758.078	2271.21	758.078	3	19	6.1.1.5791.18	74.2419	2262.79	2215.11	74.43	1.71	26499.4
1	26.07	26.07	36.69	tr|A0A287NA39	Uncharacterized protein OS=Hordeum vulgare subsp. vulgare OX=112509 PE=3 SV=1	0	84	TLEAVGQVNSWVEQVTTGLIK				-0.00143517	2271.21	758.077	2271.21	758.078	3	18	6.1.1.5809.17	75.9437	2141.8	2070.25	75.59	3.41	30658.8
1	26.07	26.07	36.69	tr|A0A287NA39	Uncharacterized protein OS=Hordeum vulgare subsp. vulgare OX=112509 PE=3 SV=1	0	84	TLEAVGQVNSWVEQVTTGLIK				-0.00143517	2271.21	758.077	2271.21	758.078	3	19	6.1.1.5814.20	76.4301	2141.8	1931.72	75.59	3.41	30463.3
1	26.07	26.07	36.69	tr|A0A287NA39	Uncharacterized protein OS=Hordeum vulgare subsp. vulgare OX=112509 PE=3 SV=1	0	84	TLEAVGQVNSWVEQVTTGLIK				-0.00143517	2271.21	758.077	2271.21	758.078	3	20	6.1.1.5827.18	77.6547	2141.8	1563.21	75.59	3.41	29933.5
1	26.07	26.07	36.69	tr|A0A287NA39	Uncharacterized protein OS=Hordeum vulgare subsp. vulgare OX=112509 PE=3 SV=1	0	84	TLEAVGQVNSWVEQVTTGLIK				-0.00143517	2271.21	758.077	2271.21	758.078	3	20	6.1.1.5831.19	78.0379	2141.8	1417.19	75.59	3.41	28524.3
1	26.07	26.07	36.69	tr|A0A287NA39	Uncharacterized protein OS=Hordeum vulgare subsp. vulgare OX=112509 PE=3 SV=1	0	68.46	TLEAVGQVNSWVEQVTTGLIK				-0.00143517	2271.21	758.077	2271.21	758.078	3	19	6.1.1.5801.18	75.1896	2141.8	1894.61	75.59	3.41	32084.9
1	26.07	26.07	36.69	tr|A0A287NA39	Uncharacterized protein OS=Hordeum vulgare subsp. vulgare OX=112509 PE=3 SV=1	0	62.72	TLEAVGQVNSWVEQVTTGLIK				0.139362	2271.35	758.124	2271.21	758.078	3	20	8.1.1.5855.17	74.5548	2722.93	2217.16	74.29	1.14	29778
1	26.07	26.07	36.69	tr|A0A287NA39	Uncharacterized protein OS=Hordeum vulgare subsp. vulgare OX=112509 PE=3 SV=1	0	56.97	TLEAVGQVNSWVEQVTTGLIK				0.132587	2271.34	758.122	2271.21	758.078	3	22	8.1.1.5764.16	65.9319	3561.68	3430.14	65.86	1.13	35938.7
1	26.07	26.07	36.69	tr|A0A287NA39	Uncharacterized protein OS=Hordeum vulgare subsp. vulgare OX=112509 PE=3 SV=1	0	56.97	TLEAVGQVNSWVEQVTTGLIK				0.137531	2271.35	758.124	2271.21	758.078	3	20	8.1.1.5905.18	79.3008	1760.36	1724.97	79.32	0.47	23371.3
1	26.07	26.07	36.69	tr|A0A287NA39	Uncharacterized protein OS=Hordeum vulgare subsp. vulgare OX=112509 PE=3 SV=1	0	56.18	TLEAVGQVNSWVEQVTTGLIK				0.139362	2271.35	758.124	2271.21	758.078	3	22	8.1.1.5730.10	62.6917	231602	10807.9	61.89	0.38	52302
1	26.07	26.07	36.69	tr|A0A287NA39	Uncharacterized protein OS=Hordeum vulgare subsp. vulgare OX=112509 PE=3 SV=1	0	56.18	TLEAVGQVNSWVEQVTTGLIK				0.139362	2271.35	758.124	2271.21	758.078	3	22	8.1.1.5735.11	63.1689	231602	7320.96	61.89	0.38	48461.4
1	26.07	26.07	36.69	tr|A0A287NA39	Uncharacterized protein OS=Hordeum vulgare subsp. vulgare OX=112509 PE=3 SV=1	0	51.86	TLEAVGQVNSWVEQVTTGLIK	Deamidated(N)@9			0.00845426	2272.2	758.408	2272.2	758.406	3	21	7.1.1.5446.11	62.9106	11942.9	8294.5	63.05	0.38	48361.1
1	26.07	26.07	36.69	tr|A0A287NA39	Uncharacterized protein OS=Hordeum vulgare subsp. vulgare OX=112509 PE=3 SV=1	0	47.35	TLEAVGQVNSWVEQVTTGLIK	Deamidated(N)@9			-0.00575909	2272.19	758.404	2272.2	758.406	3	20	5.1.1.6625.13	73.6213	3832.3	1440.99	71.83	2.84	18853.5
1	26.07	26.07	36.69	tr|A0A287NA39	Uncharacterized protein OS=Hordeum vulgare subsp. vulgare OX=112509 PE=3 SV=1	0	46.57	TLEAVGQVNSWVEQVTTGLIK				-0.000885892	2271.21	758.077	2271.21	758.078	3	20	6.1.1.5711.14	66.646	3209.41	2691	67.63	2.55	27775.5
1	26.07	26.07	36.69	tr|A0A287NA39	Uncharacterized protein OS=Hordeum vulgare subsp. vulgare OX=112509 PE=3 SV=1	0	46.57	TLEAVGQVNSWVEQVTTGLIK				-0.000885892	2271.21	758.077	2271.21	758.078	3	21	6.1.1.5724.14	67.8757	3209.41	3058.71	67.63	2.55	30518.8
1	26.07	26.07	36.69	tr|A0A287NA39	Uncharacterized protein OS=Hordeum vulgare subsp. vulgare OX=112509 PE=3 SV=1	0	46.57	TLEAVGQVNSWVEQVTTGLIK				-0.000885892	2271.21	758.077	2271.21	758.078	3	19	6.1.1.5730.15	68.4489	3209.41	2511.16	67.63	2.55	28772.2
1	26.07	26.07	36.69	tr|A0A287NA39	Uncharacterized protein OS=Hordeum vulgare subsp. vulgare OX=112509 PE=3 SV=1	0	46.57	TLEAVGQVNSWVEQVTTGLIK				0.00112812	2271.21	758.078	2271.21	758.078	3	20	6.1.1.5793.16	74.4231	2262.79	2256.83	74.43	1.71	33322.1
1	26.07	26.07	36.69	tr|A0A287NA39	Uncharacterized protein OS=Hordeum vulgare subsp. vulgare OX=112509 PE=3 SV=1	0	46.57	TLEAVGQVNSWVEQVTTGLIK				-0.00143517	2271.21	758.077	2271.21	758.078	3	20	6.1.1.5812.18	76.2322	2141.8	2007.95	75.59	3.41	33037.1
1	26.07	26.07	36.69	tr|A0A287NA39	Uncharacterized protein OS=Hordeum vulgare subsp. vulgare OX=112509 PE=3 SV=1	0	46.57	TLEAVGQVNSWVEQVTTGLIK				-0.00143517	2271.21	758.077	2271.21	758.078	3	21	6.1.1.5817.16	76.6981	2141.8	1921.75	75.59	3.41	31073.8
1	26.07	26.07	36.69	tr|A0A287NA39	Uncharacterized protein OS=Hordeum vulgare subsp. vulgare OX=112509 PE=3 SV=1	0	46.57	TLEAVGQVNSWVEQVTTGLIK				-0.00143517	2271.21	758.077	2271.21	758.078	3	19	6.1.1.5819.16	76.8877	2141.8	1821.75	75.59	3.41	31445.6
1	26.07	26.07	36.69	tr|A0A287NA39	Uncharacterized protein OS=Hordeum vulgare subsp. vulgare OX=112509 PE=3 SV=1	0	46.57	TLEAVGQVNSWVEQVTTGLIK				-0.00143517	2271.21	758.077	2271.21	758.078	3	19	6.1.1.5822.19	77.1848	2141.8	1774.02	75.59	3.41	29554.5
1	26.07	26.07	36.69	tr|A0A287NA39	Uncharacterized protein OS=Hordeum vulgare subsp. vulgare OX=112509 PE=3 SV=1	0	46.57	TLEAVGQVNSWVEQVTTGLIK				-0.00143517	2271.21	758.077	2271.21	758.078	3	19	6.1.1.5823.16	77.2671	2141.8	1786	75.59	3.41	30554.1
1	26.07	26.07	36.69	tr|A0A287NA39	Uncharacterized protein OS=Hordeum vulgare subsp. vulgare OX=112509 PE=3 SV=1	0	46.57	TLEAVGQVNSWVEQVTTGLIK				-0.00143517	2271.21	758.077	2271.21	758.078	3	19	6.1.1.5824.19	77.3743	2141.8	1732.36	75.59	3.41	32163.6
1	26.07	26.07	36.69	tr|A0A287NA39	Uncharacterized protein OS=Hordeum vulgare subsp. vulgare OX=112509 PE=3 SV=1	0	46.57	TLEAVGQVNSWVEQVTTGLIK				-0.00143517	2271.21	758.077	2271.21	758.078	3	19	6.1.1.5832.18	78.1287	2141.8	1377.52	75.59	3.41	28304.7
1	26.07	26.07	36.69	tr|A0A287NA39	Uncharacterized protein OS=Hordeum vulgare subsp. vulgare OX=112509 PE=3 SV=1	0	46	TLEAVGQVNSWVEQVTTGLIK				-0.00897022	2271.2	758.075	2271.21	758.078	3	19	5.1.1.6596.17	70.8881	2173.18	2002.95	71.27	1.99	25507.4
1	26.07	26.07	36.69	tr|A0A287NA39	Uncharacterized protein OS=Hordeum vulgare subsp. vulgare OX=112509 PE=3 SV=1	0	46	TLEAVGQVNSWVEQVTTGLIK				-0.00897022	2271.2	758.075	2271.21	758.078	3	19	5.1.1.6601.15	71.3534	2173.18	2070.13	71.27	1.99	24346.1
1	26.07	26.07	36.69	tr|A0A287NA39	Uncharacterized protein OS=Hordeum vulgare subsp. vulgare OX=112509 PE=3 SV=1	0	46	TLEAVGQVNSWVEQVTTGLIK	Deamidated(N)@9			-0.00575909	2272.19	758.404	2272.2	758.406	3	18	5.1.1.6601.16	71.3576	3832.3	2894.84	71.83	2.84	21037
1	26.07	26.07	36.69	tr|A0A287NA39	Uncharacterized protein OS=Hordeum vulgare subsp. vulgare OX=112509 PE=3 SV=1	0	46	TLEAVGQVNSWVEQVTTGLIK	Deamidated(Q)@14			-0.00575909	2272.19	758.404	2272.2	758.406	3	20	5.1.1.6610.16	72.2103	3832.3	2568.05	71.83	2.84	22500.1
1	26.07	26.07	36.69	tr|A0A287NA39	Uncharacterized protein OS=Hordeum vulgare subsp. vulgare OX=112509 PE=3 SV=1	0	46	TLEAVGQVNSWVEQVTTGLIK	Deamidated(N)@9			-0.00575909	2272.19	758.404	2272.2	758.406	3	19	5.1.1.6622.15	73.3445	3832.3	1585.72	71.83	2.84	19624.2
1	26.07	26.07	36.69	tr|A0A287NA39	Uncharacterized protein OS=Hordeum vulgare subsp. vulgare OX=112509 PE=3 SV=1	0	42.14	TLEAVGQVNSWVEQVTTGLIK	Deamidated(N)@9			-0.00575909	2272.19	758.404	2272.2	758.406	3	18	5.1.1.6591.16	70.4102	3832.3	1990.61	71.83	2.84	22083.5
1	26.07	26.07	36.69	tr|A0A287NA39	Uncharacterized protein OS=Hordeum vulgare subsp. vulgare OX=112509 PE=3 SV=1	0	42.14	TLEAVGQVNSWVEQVTTGLIK	Deamidated(N)@9			-0.00575909	2272.19	758.404	2272.2	758.406	3	18	5.1.1.6599.16	71.168	3832.3	2350.96	71.83	2.84	24623.6
1	26.07	26.07	36.69	tr|A0A287NA39	Uncharacterized protein OS=Hordeum vulgare subsp. vulgare OX=112509 PE=3 SV=1	0	40.91	TLEAVGQVNSWVEQVTTGLIK	Trp->Kynurenin(W)@11			0.0244834	2275.23	759.417	2275.21	759.409	3	17	5.1.1.6536.14	65.1978	2672.11	328	66.19	0.57	31648.8
1	26.07	26.07	36.69	tr|A0A287NA39	Uncharacterized protein OS=Hordeum vulgare subsp. vulgare OX=112509 PE=3 SV=1	0	39.7	TLEAVGQVNSWVEQVTTGLIK	Deamidated(Q)@7			-0.0220542	2272.17	758.398	2272.2	758.406	3	19	5.1.1.6582.13	69.5455	3157.84	2420.4	69.02	1.7	22963
1	26.07	26.07	36.69	tr|A0A287NA39	Uncharacterized protein OS=Hordeum vulgare subsp. vulgare OX=112509 PE=3 SV=1	0	39.7	TLEAVGQVNSWVEQVTTGLIK				-0.00897022	2271.2	758.075	2271.21	758.078	3	19	5.1.1.6593.15	70.5954	2173.18	1840.04	71.27	1.99	26680.4
1	26.07	26.07	36.69	tr|A0A287NA39	Uncharacterized protein OS=Hordeum vulgare subsp. vulgare OX=112509 PE=3 SV=1	0	39.7	TLEAVGQVNSWVEQVTTGLIK				-0.00897022	2271.2	758.075	2271.21	758.078	3	19	5.1.1.6595.15	70.785	2173.18	2041.18	71.27	1.99	24958.9
1	26.07	26.07	36.69	tr|A0A287NA39	Uncharacterized protein OS=Hordeum vulgare subsp. vulgare OX=112509 PE=3 SV=1	0	38.52	TLEAVGQVNSWVEQVTTGLIK	Deamidated(N)@9			-0.00575909	2272.19	758.404	2272.2	758.406	3	19	5.1.1.6614.16	72.5894	3832.3	1790.04	71.83	2.84	23706.1
1	26.07	26.07	36.69	tr|A0A287NA39	Uncharacterized protein OS=Hordeum vulgare subsp. vulgare OX=112509 PE=3 SV=1	0	37.37	TLEAVGQVNSWVEQVTTGLIK	Deamidated(N)@9			-0.00575909	2272.19	758.404	2272.2	758.406	3	18	5.1.1.6612.16	72.4001	3832.3	1970	71.83	2.84	23995.1
1	26.07	26.07	36.69	tr|A0A287NA39	Uncharacterized protein OS=Hordeum vulgare subsp. vulgare OX=112509 PE=3 SV=1	0	37.37	TLEAVGQVNSWVEQVTTGLIK	Deamidated(N)@9			-0.00575909	2272.19	758.404	2272.2	758.406	3	20	5.1.1.6617.16	72.8742	3832.3	1683.28	71.83	2.84	22248.8
1	26.07	26.07	36.69	tr|A0A287NA39	Uncharacterized protein OS=Hordeum vulgare subsp. vulgare OX=112509 PE=3 SV=1	0	24.46	TLEAVGQVNSWVEQVTTGLIK	Deamidated(N)@9			-0.0146956	2272.18	758.401	2272.2	758.406	3	19	6.1.1.5701.14	65.7007	2907.87	2707.61	65.36	1.7	35631
1	26.07	26.07	36.69	tr|A0A287NA39	Uncharacterized protein OS=Hordeum vulgare subsp. vulgare OX=112509 PE=3 SV=1	0	24.46	TLEAVGQVNSWVEQVTTGLIK	Deamidated(Q)@7			-0.0146956	2272.18	758.401	2272.2	758.406	3	20	6.1.1.5705.18	66.0958	2907.87	2308.13	65.36	1.7	28091.2
1	26.07	26.07	36.69	tr|A0A287NA39	Uncharacterized protein OS=Hordeum vulgare subsp. vulgare OX=112509 PE=3 SV=1	0	24.46	TLEAVGQVNSWVEQVTTGLIK				-0.000885892	2271.21	758.077	2271.21	758.078	3	20	6.1.1.5710.14	66.5516	3209.41	2672.88	67.63	2.55	32626.4
1	26.07	26.07	36.69	tr|A0A287NA39	Uncharacterized protein OS=Hordeum vulgare subsp. vulgare OX=112509 PE=3 SV=1	0	24.46	TLEAVGQVNSWVEQVTTGLIK	Deamidated(Q)@7			-0.0201884	2272.18	758.399	2272.2	758.406	3	21	6.1.1.5713.14	66.8348	3941	2621.38	67.89	2.27	28962
1	26.07	26.07	36.69	tr|A0A287NA39	Uncharacterized protein OS=Hordeum vulgare subsp. vulgare OX=112509 PE=3 SV=1	0	24.46	TLEAVGQVNSWVEQVTTGLIK				-0.000885892	2271.21	758.077	2271.21	758.078	3	18	6.1.1.5715.16	67.0322	3209.41	2842.27	67.63	2.55	29832.5
1	26.07	26.07	36.69	tr|A0A287NA39	Uncharacterized protein OS=Hordeum vulgare subsp. vulgare OX=112509 PE=3 SV=1	0	24.46	TLEAVGQVNSWVEQVTTGLIK				-0.000885892	2271.21	758.077	2271.21	758.078	3	21	6.1.1.5732.14	68.6338	3209.41	2483.96	67.63	2.55	36186
1	26.07	26.07	36.69	tr|A0A287NA39	Uncharacterized protein OS=Hordeum vulgare subsp. vulgare OX=112509 PE=3 SV=1	0	24.46	TLEAVGQVNSWVEQVTTGLIK	Deamidated(N)@9			-0.00993522	2272.19	758.402	2272.2	758.406	3	18	6.1.1.5745.17	69.8766	4276.91	2395.75	70.75	3.7	29208.3
1	26.07	26.07	36.69	tr|A0A287NA39	Uncharacterized protein OS=Hordeum vulgare subsp. vulgare OX=112509 PE=3 SV=1	0	24.46	TLEAVGQVNSWVEQVTTGLIK	Deamidated(N)@9			-0.00993522	2272.19	758.402	2272.2	758.406	3	21	6.1.1.5761.18	71.3967	4276.91	2856.38	70.75	3.7	30424.3
1	26.07	26.07	36.69	tr|A0A287NA39	Uncharacterized protein OS=Hordeum vulgare subsp. vulgare OX=112509 PE=3 SV=1	0	24.46	TLEAVGQVNSWVEQVTTGLIK	Deamidated(N)@9			-0.00993522	2272.19	758.402	2272.2	758.406	3	21	6.1.1.5771.19	72.3494	4276.91	2292.28	70.75	3.7	29337
1	26.07	26.07	36.69	tr|A0A287NA39	Uncharacterized protein OS=Hordeum vulgare subsp. vulgare OX=112509 PE=3 SV=1	0	24.46	TLEAVGQVNSWVEQVTTGLIK	Deamidated(Q)@14			-0.00993522	2272.19	758.402	2272.2	758.406	3	20	6.1.1.5772.19	72.4441	4276.91	2361.27	70.75	3.7	29030.3
1	26.07	26.07	36.69	tr|A0A287NA39	Uncharacterized protein OS=Hordeum vulgare subsp. vulgare OX=112509 PE=3 SV=1	0	24.46	TLEAVGQVNSWVEQVTTGLIK				0.00112812	2271.21	758.078	2271.21	758.078	3	18	6.1.1.5793.17	74.4272	2262.79	2257.79	74.43	1.71	26673.9
1	26.07	26.07	36.69	tr|A0A287NA39	Uncharacterized protein OS=Hordeum vulgare subsp. vulgare OX=112509 PE=3 SV=1	0	24.46	TLEAVGQVNSWVEQVTTGLIK				0.00112812	2271.21	758.078	2271.21	758.078	3	20	6.1.1.5796.16	74.7075	2262.79	1961.76	74.43	1.71	36706.8
1	26.07	26.07	36.69	tr|A0A287NA39	Uncharacterized protein OS=Hordeum vulgare subsp. vulgare OX=112509 PE=3 SV=1	0	24.46	TLEAVGQVNSWVEQVTTGLIK				-0.00143517	2271.21	758.077	2271.21	758.078	3	20	6.1.1.5805.18	75.5688	2141.8	2127.59	75.59	3.41	26006.2
1	26.07	26.07	36.69	tr|A0A287NA39	Uncharacterized protein OS=Hordeum vulgare subsp. vulgare OX=112509 PE=3 SV=1	0	24.46	TLEAVGQVNSWVEQVTTGLIK				-0.00143517	2271.21	758.077	2271.21	758.078	3	21	6.1.1.5807.16	75.7498	2141.8	2107.13	75.59	3.41	33181.6
1	26.07	26.07	36.69	tr|A0A287NA39	Uncharacterized protein OS=Hordeum vulgare subsp. vulgare OX=112509 PE=3 SV=1	0	24.46	TLEAVGQVNSWVEQVTTGLIK				-0.00143517	2271.21	758.077	2271.21	758.078	3	20	6.1.1.5813.18	76.3271	2141.8	1971.4	75.59	3.41	31108.1
1	26.07	26.07	36.69	tr|A0A287NA39	Uncharacterized protein OS=Hordeum vulgare subsp. vulgare OX=112509 PE=3 SV=1	0	24.46	TLEAVGQVNSWVEQVTTGLIK				-0.00143517	2271.21	758.077	2271.21	758.078	3	19	6.1.1.5821.17	77.0817	2141.8	1759.03	75.59	3.41	29716
1	26.07	26.07	36.69	tr|A0A287NA39	Uncharacterized protein OS=Hordeum vulgare subsp. vulgare OX=112509 PE=3 SV=1	0	23.41	TLEAVGQVNSWVEQVTTGLIK				0.135151	2271.35	758.123	2271.21	758.078	3	19	8.1.1.5896.18	78.4471	2064.34	1777.94	78.27	0.66	25843.4
1	26.07	26.07	36.69	tr|A0A287NA39	Uncharacterized protein OS=Hordeum vulgare subsp. vulgare OX=112509 PE=3 SV=1	0	21.64	TLEAVGQVNSWVEQVTTGLIK	Carbamidomethyl@N-term			0.141885	2328.37	777.132	2328.23	777.085	3	21	7.1.1.5436.11	61.9659	32044.8	10581.4	61.64	0.38	27298
1	26.07	26.07	36.69	tr|A0A287NA39	Uncharacterized protein OS=Hordeum vulgare subsp. vulgare OX=112509 PE=3 SV=1	0	20.34	TLEAVGQVNSWVEQVTTGLIK				-0.000783412	2271.21	758.077	2271.21	758.078	3	19	7.1.1.5501.17	68.1342	3389.93	2797.77	67.68	1.23	27768.2
1	26.07	26.07	36.69	tr|A0A287NA39	Uncharacterized protein OS=Hordeum vulgare subsp. vulgare OX=112509 PE=3 SV=1	0	20.34	TLEAVGQVNSWVEQVTTGLIK				-0.00133268	2271.21	758.077	2271.21	758.078	3	20	7.1.1.5521.18	70.0338	3157.59	2803.34	70.43	1.14	34112.4
1	26.07	26.07	36.69	tr|A0A287NA39	Uncharacterized protein OS=Hordeum vulgare subsp. vulgare OX=112509 PE=3 SV=1	0	20.34	TLEAVGQVNSWVEQVTTGLIK				-0.000234148	2271.21	758.078	2271.21	758.078	3	21	7.1.1.5534.18	71.2659	3427.52	3325.94	71.1	0.76	28835.3
1	26.07	26.07	36.69	tr|A0A287NA39	Uncharacterized protein OS=Hordeum vulgare subsp. vulgare OX=112509 PE=3 SV=1	0	20.34	TLEAVGQVNSWVEQVTTGLIK				-0.000234148	2271.21	758.078	2271.21	758.078	3	21	7.1.1.5535.17	71.3564	3427.52	2984.72	71.1	0.76	27821.5
1	26.07	26.07	36.69	tr|A0A287NA39	Uncharacterized protein OS=Hordeum vulgare subsp. vulgare OX=112509 PE=3 SV=1	0	20.34	TLEAVGQVNSWVEQVTTGLIK	Deamidated(Q)@14			-0.0195582	2272.18	758.399	2272.2	758.406	3	19	7.1.1.5549.19	72.6927	2480.44	2469.76	72.8	1.33	26819.7
1	26.07	26.07	36.69	tr|A0A287NA39	Uncharacterized protein OS=Hordeum vulgare subsp. vulgare OX=112509 PE=3 SV=1	0	20.34	TLEAVGQVNSWVEQVTTGLIK				-0.00352973	2271.21	758.077	2271.21	758.078	3	20	7.1.1.5564.18	74.1116	2760.68	2274.54	73.56	1.14	27364.2
1	26.07	26.07	36.69	tr|A0A287NA39	Uncharacterized protein OS=Hordeum vulgare subsp. vulgare OX=112509 PE=3 SV=1	0	20.34	TLEAVGQVNSWVEQVTTGLIK				-0.00352973	2271.21	758.077	2271.21	758.078	3	20	7.1.1.5565.17	74.2023	2760.68	2357.2	73.56	1.14	33632.5
1	26.07	26.07	36.69	tr|A0A287NA39	Uncharacterized protein OS=Hordeum vulgare subsp. vulgare OX=112509 PE=3 SV=1	0	20.34	TLEAVGQVNSWVEQVTTGLIK	Deamidated(N)@9			-0.0180935	2272.18	758.4	2272.2	758.406	3	20	7.1.1.5571.17	74.7716	2371.16	1938.02	73.85	1.52	25125.4
1	26.07	26.07	36.69	tr|A0A287NA39	Uncharacterized protein OS=Hordeum vulgare subsp. vulgare OX=112509 PE=3 SV=1	0	20.34	TLEAVGQVNSWVEQVTTGLIK	Deamidated(Q)@14			-0.0140656	2272.18	758.401	2272.2	758.406	3	19	7.1.1.5580.20	75.6371	2120.58	1825.69	75.93	1.8	23173.8
1	26.07	26.07	36.69	tr|A0A287NA39	Uncharacterized protein OS=Hordeum vulgare subsp. vulgare OX=112509 PE=3 SV=1	0	20.34	TLEAVGQVNSWVEQVTTGLIK				-0.000234148	2271.21	758.078	2271.21	758.078	3	20	7.1.1.5581.17	75.7194	2674.22	2389.75	76.12	2.37	30170
1	26.07	26.07	36.69	tr|A0A287NA39	Uncharacterized protein OS=Hordeum vulgare subsp. vulgare OX=112509 PE=3 SV=1	0	20.34	TLEAVGQVNSWVEQVTTGLIK				-0.000234148	2271.21	758.078	2271.21	758.078	3	20	7.1.1.5594.18	76.9568	2674.22	1704.73	76.12	2.37	27033
1	26.07	26.07	36.69	tr|A0A287NA39	Uncharacterized protein OS=Hordeum vulgare subsp. vulgare OX=112509 PE=3 SV=1	0	19.78	TLEAVGQVNSWVEQVTTGLIK				0.139362	2271.35	758.124	2271.21	758.078	3	21	8.1.1.5734.10	63.0703	231602	8727.52	61.89	0.38	46575.3
1	26.07	26.07	36.69	tr|A0A287NA39	Uncharacterized protein OS=Hordeum vulgare subsp. vulgare OX=112509 PE=3 SV=1	0	99	VDLVDFVANHPF			cleaved F-L@C-term	0.0747522	1371.76	686.886	1371.68	686.848	2	17	7.1.1.5083.8	28.5172	646.04	511.46	28.72	0.76	908.309
1	26.07	26.07	36.69	tr|A0A287NA39	Uncharacterized protein OS=Hordeum vulgare subsp. vulgare OX=112509 PE=3 SV=1	0	99	VDLVDFVANHPF			cleaved F-L@C-term	0.0747522	1371.76	686.886	1371.68	686.848	2	16	7.1.1.5084.7	28.5992	646.04	587.16	28.72	0.76	1047.56
1	26.07	26.07	36.69	tr|A0A287NA39	Uncharacterized protein OS=Hordeum vulgare subsp. vulgare OX=112509 PE=3 SV=1	0	99	VDLVDFVANHPF			cleaved F-L@C-term	0.0747522	1371.76	686.886	1371.68	686.848	2	14	7.1.1.5085.5	28.6857	646.04	631.48	28.72	0.76	1207.57
1	26.07	26.07	36.69	tr|A0A287NA39	Uncharacterized protein OS=Hordeum vulgare subsp. vulgare OX=112509 PE=3 SV=1	0	99	VDLVDFVANHPF			cleaved F-L@C-term	0.0747522	1371.76	686.886	1371.68	686.848	2	15	7.1.1.5086.6	28.7886	646.04	611.95	28.72	0.76	1237.32
1	26.07	26.07	36.69	tr|A0A287NA39	Uncharacterized protein OS=Hordeum vulgare subsp. vulgare OX=112509 PE=3 SV=1	0	99	VDLVDFVANHPF			cleaved F-L@C-term	0.0747522	1371.76	686.886	1371.68	686.848	2	16	7.1.1.5087.6	28.8833	646.04	550.75	28.72	0.76	1081.8
1	26.07	26.07	36.69	tr|A0A287NA39	Uncharacterized protein OS=Hordeum vulgare subsp. vulgare OX=112509 PE=3 SV=1	0	99	VDLVDFVANHPF			cleaved F-L@C-term	0.0747522	1371.76	686.886	1371.68	686.848	2	15	7.1.1.5088.7	28.9781	646.04	464.49	28.72	0.76	996.062
1	26.07	26.07	36.69	tr|A0A287NA39	Uncharacterized protein OS=Hordeum vulgare subsp. vulgare OX=112509 PE=3 SV=1	0	99	VDLVDFVANHPF			cleaved F-L@C-term	0.0747522	1371.76	686.886	1371.68	686.848	2	14	7.1.1.5089.7	29.0851	646.04	380.67	28.72	0.76	812.306
1	26.07	26.07	36.69	tr|A0A287NA39	Uncharacterized protein OS=Hordeum vulgare subsp. vulgare OX=112509 PE=3 SV=1	0	99	VDLVDFVANHPF			cleaved F-L@C-term	0.0747522	1371.76	686.886	1371.68	686.848	2	16	7.1.1.5090.8	29.1802	646.04	330.24	28.72	0.76	1017.3
1	26.07	26.07	36.69	tr|A0A287NA39	Uncharacterized protein OS=Hordeum vulgare subsp. vulgare OX=112509 PE=3 SV=1	0	99	VDLVDFVANHPF			cleaved F-L@C-term	-0.000572089	1371.68	686.848	1371.68	686.848	2	15	6.1.1.5770.8	72.2085	951.28	707.06	73.59	3.7	5067.78
1	26.07	26.07	36.69	tr|A0A287NA39	Uncharacterized protein OS=Hordeum vulgare subsp. vulgare OX=112509 PE=3 SV=1	0	99	VDLVDFVANHPF			cleaved F-L@C-term	-0.000572089	1371.68	686.848	1371.68	686.848	2	14	6.1.1.5775.8	72.6827	951.28	727.44	73.59	3.7	4841.27
1	26.07	26.07	36.69	tr|A0A287NA39	Uncharacterized protein OS=Hordeum vulgare subsp. vulgare OX=112509 PE=3 SV=1	0	99	VDLVDFVANHPF			cleaved F-L@C-term	-0.000572089	1371.68	686.848	1371.68	686.848	2	15	6.1.1.5778.10	72.9757	951.28	910.8	73.59	3.7	4529.52
1	26.07	26.07	36.69	tr|A0A287NA39	Uncharacterized protein OS=Hordeum vulgare subsp. vulgare OX=112509 PE=3 SV=1	0	99	VDLVDFVANHPF			cleaved F-L@C-term	-0.000572089	1371.68	686.848	1371.68	686.848	2	14	6.1.1.5781.9	73.2559	951.28	935.48	73.59	3.7	4963.28
1	26.07	26.07	36.69	tr|A0A287NA39	Uncharacterized protein OS=Hordeum vulgare subsp. vulgare OX=112509 PE=3 SV=1	0	99	VDLVDFVANHPF			cleaved F-L@C-term	-0.000572089	1371.68	686.848	1371.68	686.848	2	13	6.1.1.5802.8	75.2427	951.28	603.21	73.59	3.7	4218.45
1	26.07	26.07	36.69	tr|A0A287NA39	Uncharacterized protein OS=Hordeum vulgare subsp. vulgare OX=112509 PE=3 SV=1	0	99	VDLVDFVANHPF			cleaved F-L@C-term	0.00699573	1371.69	686.852	1371.68	686.848	2	15	6.1.1.5824.9	77.3327	31.7264	31.7264			3929.25
1	26.07	26.07	36.69	tr|A0A287NA39	Uncharacterized protein OS=Hordeum vulgare subsp. vulgare OX=112509 PE=3 SV=1	0	99	VDLVDFVANHPF			cleaved F-L@C-term	-0.00496631	1371.68	686.846	1371.68	686.848	2	13	6.1.1.5832.11	78.0996	29.1751	29.1751			3711.24
1	26.07	26.07	36.69	tr|A0A287NA39	Uncharacterized protein OS=Hordeum vulgare subsp. vulgare OX=112509 PE=3 SV=1	0	99	VDLVDFVANHPF			cleaved F-L@C-term	0.0769495	1371.76	686.887	1371.68	686.848	2	12	8.1.1.5398.10	31.2693	411.32	334.14	31.66	0.76	825.588
1	26.07	26.07	36.69	tr|A0A287NA39	Uncharacterized protein OS=Hordeum vulgare subsp. vulgare OX=112509 PE=3 SV=1	0	99	VDLVDFVANHPF			cleaved F-L@C-term	0.0769495	1371.76	686.887	1371.68	686.848	2	15	8.1.1.5399.9	31.3554	411.32	341.17	31.66	0.76	848.028
1	26.07	26.07	36.69	tr|A0A287NA39	Uncharacterized protein OS=Hordeum vulgare subsp. vulgare OX=112509 PE=3 SV=1	0	99	VDLVDFVANHPF			cleaved F-L@C-term	0.0769495	1371.76	686.887	1371.68	686.848	2	12	8.1.1.5400.6	31.4412	411.32	376.96	31.66	0.76	703.803
1	26.07	26.07	36.69	tr|A0A287NA39	Uncharacterized protein OS=Hordeum vulgare subsp. vulgare OX=112509 PE=3 SV=1	0	99	VDLVDFVANHPF			cleaved F-L@C-term	0.0769495	1371.76	686.887	1371.68	686.848	2	15	8.1.1.5401.7	31.5356	411.32	395.95	31.66	0.76	905.809
1	26.07	26.07	36.69	tr|A0A287NA39	Uncharacterized protein OS=Hordeum vulgare subsp. vulgare OX=112509 PE=3 SV=1	0	99	VDLVDFVANHPF			cleaved F-L@C-term	0.0769495	1371.76	686.887	1371.68	686.848	2	15	8.1.1.5402.9	31.6388	411.32	408.06	31.66	0.76	1151.1
1	26.07	26.07	36.69	tr|A0A287NA39	Uncharacterized protein OS=Hordeum vulgare subsp. vulgare OX=112509 PE=3 SV=1	0	99	VDLVDFVANHPF			cleaved F-L@C-term	0.0769495	1371.76	686.887	1371.68	686.848	2	11	8.1.1.5403.8	31.7251	411.32	347.02	31.66	0.76	1046.6
1	26.07	26.07	36.69	tr|A0A287NA39	Uncharacterized protein OS=Hordeum vulgare subsp. vulgare OX=112509 PE=3 SV=1	0	99	VDLVDFVANHPF			cleaved F-L@C-term	0.0769495	1371.76	686.887	1371.68	686.848	2	13	8.1.1.5404.9	31.8202	411.32	254.49	31.66	0.76	1026.6
1	26.07	26.07	36.69	tr|A0A287NA39	Uncharacterized protein OS=Hordeum vulgare subsp. vulgare OX=112509 PE=3 SV=1	0	99	VDLVDFVANHPF			cleaved F-L@C-term	0.0757288	1371.76	686.886	1371.68	686.848	2	13	6.1.1.5325.6	29.9121	525.23	464.16	30.21	0.57	810.306
1	26.07	26.07	36.69	tr|A0A287NA39	Uncharacterized protein OS=Hordeum vulgare subsp. vulgare OX=112509 PE=3 SV=1	0	99	VDLVDFVANHPF			cleaved F-L@C-term	0.0757288	1371.76	686.886	1371.68	686.848	2	16	6.1.1.5326.6	30.0068	525.23	498.72	30.21	0.57	1037.06
1	26.07	26.07	36.69	tr|A0A287NA39	Uncharacterized protein OS=Hordeum vulgare subsp. vulgare OX=112509 PE=3 SV=1	0	99	VDLVDFVANHPF			cleaved F-L@C-term	0.0757288	1371.76	686.886	1371.68	686.848	2	16	6.1.1.5327.7	30.1016	525.23	510.12	30.21	0.57	1153.57
1	26.07	26.07	36.69	tr|A0A287NA39	Uncharacterized protein OS=Hordeum vulgare subsp. vulgare OX=112509 PE=3 SV=1	0	99	VDLVDFVANHPF			cleaved F-L@C-term	0.0757288	1371.76	686.886	1371.68	686.848	2	15	6.1.1.5328.9	30.2055	525.23	522.62	30.21	0.57	1686.11
1	26.07	26.07	36.69	tr|A0A287NA39	Uncharacterized protein OS=Hordeum vulgare subsp. vulgare OX=112509 PE=3 SV=1	0	99	VDLVDFVANHPF			cleaved F-L@C-term	0.0757288	1371.76	686.886	1371.68	686.848	2	15	6.1.1.5329.9	30.2838	525.23	493.84	30.21	0.57	1793.12
1	26.07	26.07	36.69	tr|A0A287NA39	Uncharacterized protein OS=Hordeum vulgare subsp. vulgare OX=112509 PE=3 SV=1	0	99	VDLVDFVANHPF			cleaved F-L@C-term	0.0757288	1371.76	686.886	1371.68	686.848	2	10	6.1.1.5330.15	30.3875	525.23	436.28	30.21	0.57	1650.18
1	26.07	26.07	36.69	tr|A0A287NA39	Uncharacterized protein OS=Hordeum vulgare subsp. vulgare OX=112509 PE=3 SV=1	0	99	VDLVDFVANHPF			cleaved F-L@C-term	0.0747522	1371.76	686.886	1371.68	686.848	2	11	7.1.1.5091.11	29.2709	646.04	273.17	28.72	0.76	1237.6
1	26.07	26.07	36.69	tr|A0A287NA39	Uncharacterized protein OS=Hordeum vulgare subsp. vulgare OX=112509 PE=3 SV=1	0	99	VDLVDFVANHPF			cleaved F-L@C-term	-0.000572089	1371.68	686.848	1371.68	686.848	2	12	6.1.1.5774.10	72.5962	951.28	731.45	73.59	3.7	4748.52
1	26.07	26.07	36.69	tr|A0A287NA39	Uncharacterized protein OS=Hordeum vulgare subsp. vulgare OX=112509 PE=3 SV=1	0	99	VDLVDFVANHPF			cleaved F-L@C-term	-0.000572089	1371.68	686.848	1371.68	686.848	2	13	6.1.1.5782.10	73.3552	951.28	929.46	73.59	3.7	4855.27
1	26.07	26.07	36.69	tr|A0A287NA39	Uncharacterized protein OS=Hordeum vulgare subsp. vulgare OX=112509 PE=3 SV=1	0	99	VDLVDFVANHPF			cleaved F-L@C-term	-0.000572089	1371.68	686.848	1371.68	686.848	2	12	6.1.1.5784.11	73.5489	951.28	919.74	73.59	3.7	4641.52
1	26.07	26.07	36.69	tr|A0A287NA39	Uncharacterized protein OS=Hordeum vulgare subsp. vulgare OX=112509 PE=3 SV=1	0	99	VDLVDFVANHPF			cleaved F-L@C-term	-0.000572089	1371.68	686.848	1371.68	686.848	2	12	6.1.1.5789.9	74.0145	951.28	744.57	73.59	3.7	4520.21
1	26.07	26.07	36.69	tr|A0A287NA39	Uncharacterized protein OS=Hordeum vulgare subsp. vulgare OX=112509 PE=3 SV=1	0	99	VDLVDFVANHPF			cleaved F-L@C-term	-0.000572089	1371.68	686.848	1371.68	686.848	2	12	6.1.1.5797.8	74.7694	951.28	765.59	73.59	3.7	4633.52
1	26.07	26.07	36.69	tr|A0A287NA39	Uncharacterized protein OS=Hordeum vulgare subsp. vulgare OX=112509 PE=3 SV=1	0	99	VDLVDFVANHPF			cleaved F-L@C-term	-0.00679723	1371.68	686.845	1371.68	686.848	2	11	6.1.1.5825.10	77.4317	30.4408	30.4408			3953.25
1	26.07	26.07	36.69	tr|A0A287NA39	Uncharacterized protein OS=Hordeum vulgare subsp. vulgare OX=112509 PE=3 SV=1	0	99	VDLVDFVANHPF			cleaved F-L@C-term	0.00345505	1371.69	686.85	1371.68	686.848	2	14	7.1.1.5521.11	70.0046	950.94	848.35	70.15	1.23	7439.6
1	26.07	26.07	36.69	tr|A0A287NA39	Uncharacterized protein OS=Hordeum vulgare subsp. vulgare OX=112509 PE=3 SV=1	0	99	VDLVDFVANHPF			cleaved F-L@C-term	0.00284475	1371.69	686.85	1371.68	686.848	2	12	7.1.1.5551.8	72.8366	894.33	851.84	72.8	0.85	4696.52
1	26.07	26.07	36.69	tr|A0A287NA39	Uncharacterized protein OS=Hordeum vulgare subsp. vulgare OX=112509 PE=3 SV=1	0	99	VDLVDFVANHPF			cleaved F-L@C-term	0.00284475	1371.69	686.85	1371.68	686.848	2	12	7.1.1.5552.10	72.9399	894.33	760.86	72.8	0.85	4588.77
1	26.07	26.07	36.69	tr|A0A287NA39	Uncharacterized protein OS=Hordeum vulgare subsp. vulgare OX=112509 PE=3 SV=1	0	99	VDLVDFVANHPF			cleaved F-L@C-term	0.000159453	1371.68	686.848	1371.68	686.848	2	11	7.1.1.5559.9	73.5995	791.19	736.05	74.32	1.61	4276.26
1	26.07	26.07	36.69	tr|A0A287NA39	Uncharacterized protein OS=Hordeum vulgare subsp. vulgare OX=112509 PE=3 SV=1	0	99	VDLVDFVANHPF			cleaved F-L@C-term	0.000159453	1371.68	686.848	1371.68	686.848	2	12	7.1.1.5564.10	74.0782	791.19	609.83	74.32	1.61	4261.26
1	26.07	26.07	36.69	tr|A0A287NA39	Uncharacterized protein OS=Hordeum vulgare subsp. vulgare OX=112509 PE=3 SV=1	0	99	VDLVDFVANHPF			cleaved F-L@C-term	0.0773157	1371.76	686.887	1371.68	686.848	2	15	5.1.1.6503.9	62.0491	2614.88	2596.56	61.92	1.42	12492.4
1	26.07	26.07	36.69	tr|A0A287NA39	Uncharacterized protein OS=Hordeum vulgare subsp. vulgare OX=112509 PE=3 SV=1	0	98.58	VDLVDFVANHPF			cleaved F-L@C-term	0.00479862	1371.69	686.851	1371.68	686.848	2	13	6.1.1.5721.10	67.5751	1136.41	1074.42	67.64	1.14	5494.79
1	26.07	26.07	36.69	tr|A0A287NA39	Uncharacterized protein OS=Hordeum vulgare subsp. vulgare OX=112509 PE=3 SV=1	0	98.58	VDLVDFVANHPF			cleaved F-L@C-term	-0.0011824	1371.68	686.848	1371.68	686.848	2	11	6.1.1.5830.11	77.9098	30.6538	30.6538			3725.18
1	26.07	26.07	36.69	tr|A0A287NA39	Uncharacterized protein OS=Hordeum vulgare subsp. vulgare OX=112509 PE=3 SV=1	0	96.74	VDLVDFVANHPF			cleaved F-L@C-term	-0.000572089	1371.68	686.848	1371.68	686.848	2	11	6.1.1.5793.10	74.398	951.28	748.74	73.59	3.7	4326.26
1	26.07	26.07	36.69	tr|A0A287NA39	Uncharacterized protein OS=Hordeum vulgare subsp. vulgare OX=112509 PE=3 SV=1	0	93.44	VDLVDFVANHPF			cleaved F-L@C-term	0.081344	1371.76	686.889	1371.68	686.848	2	14	8.1.1.5824.6	71.5678	988.66	879.86	72.3	1.71	5831.81
1	26.07	26.07	36.69	tr|A0A287NA39	Uncharacterized protein OS=Hordeum vulgare subsp. vulgare OX=112509 PE=3 SV=1	0	93.44	VDLVDFVANHPF			cleaved F-L@C-term	0.081344	1371.76	686.889	1371.68	686.848	2	14	8.1.1.5837.10	72.8177	988.66	949.28	72.3	1.71	5343.29
1	26.07	26.07	36.69	tr|A0A287NA39	Uncharacterized protein OS=Hordeum vulgare subsp. vulgare OX=112509 PE=3 SV=1	0	77.95	VDLVDFVANHPF			cleaved F-L@C-term	0.00552814	1371.69	686.851	1371.68	686.848	2	14	5.1.1.7936.5	108.924	524.73	434.81	109.16	1.14	3698.24
1	26.07	26.07	36.69	tr|A0A287NA39	Uncharacterized protein OS=Hordeum vulgare subsp. vulgare OX=112509 PE=3 SV=1	0	77.95	VDLVDFVANHPF			cleaved F-L@C-term	0.00552814	1371.69	686.851	1371.68	686.848	2	14	5.1.1.7937.7	109.028	524.73	470.41	109.16	1.14	4757.26
1	26.07	26.07	36.69	tr|A0A287NA39	Uncharacterized protein OS=Hordeum vulgare subsp. vulgare OX=112509 PE=3 SV=1	0	59.43	VDLVDFVANHPF			cleaved F-L@C-term	0.00552814	1371.69	686.851	1371.68	686.848	2	13	5.1.1.7938.9	109.132	524.73	505.93	109.16	1.14	5523.54
1	26.07	26.07	36.69	tr|A0A287NA39	Uncharacterized protein OS=Hordeum vulgare subsp. vulgare OX=112509 PE=3 SV=1	0	52.33	VDLVDFVANHPF			cleaved F-L@C-term	-0.00313786	1371.68	686.847	1371.68	686.848	2	9	5.1.1.6754.10	85.8543	488.22	385.65	85.24	1.99	2594.14
1	26.07	26.07	36.69	tr|A0A287NA39	Uncharacterized protein OS=Hordeum vulgare subsp. vulgare OX=112509 PE=3 SV=1	0	46.57	VDLVDFVANHPF			cleaved F-L@C-term	0.00479862	1371.69	686.851	1371.68	686.848	2	11	6.1.1.5730.7	68.4156	1136.41	750.06	67.64	1.14	5509.29
1	26.07	26.07	36.69	tr|A0A287NA39	Uncharacterized protein OS=Hordeum vulgare subsp. vulgare OX=112509 PE=3 SV=1	0	46.57	VDLVDFVANHPF	Deamidated(N)@9		cleaved F-L@C-term	0.0191247	1372.69	687.35	1372.67	687.34	2	12	6.1.1.5811.10	76.1041	545.85	405.82	75.61	2.28	4480.51
1	26.07	26.07	36.69	tr|A0A287NA39	Uncharacterized protein OS=Hordeum vulgare subsp. vulgare OX=112509 PE=3 SV=1	0	41.74	VDLVDFVANHPF			cleaved F-L@C-term	-0.00313786	1371.68	686.847	1371.68	686.848	2	8	5.1.1.6745.12	85.0083	488.22	425.1	85.24	1.99	2705.21
1	26.07	26.07	36.69	tr|A0A287NA39	Uncharacterized protein OS=Hordeum vulgare subsp. vulgare OX=112509 PE=3 SV=1	0	23.41	VDLVDFVANHPF			cleaved F-L@C-term	0.081344	1371.76	686.889	1371.68	686.848	2	12	8.1.1.5833.10	72.438	988.66	904.02	72.3	1.71	5568.55
1	26.07	26.07	36.69	tr|A0A287NA39	Uncharacterized protein OS=Hordeum vulgare subsp. vulgare OX=112509 PE=3 SV=1	0	94.77	VDLVDFVANHPFL			cleaved L-F@C-term	0.0856589	1484.85	743.433	1484.77	743.39	2	16	5.1.1.6511.10	62.8128	7399.96	5750.74	62.49	0.57	16303.1
1	26.07	26.07	36.69	tr|A0A287NA39	Uncharacterized protein OS=Hordeum vulgare subsp. vulgare OX=112509 PE=3 SV=1	0	99	VDLVDFVANHPFLF			cleaved F-L@C-term	0.00798878	1631.84	544.955	1631.83	544.952	3	15	7.1.1.5469.3	65.0476	156655	3008.27	64.09	0.38	6353.32
1	26.07	26.07	36.69	tr|A0A287NA39	Uncharacterized protein OS=Hordeum vulgare subsp. vulgare OX=112509 PE=3 SV=1	0	99	VDLVDFVANHPFLF			cleaved F-L@C-term	0.00642594	1631.84	816.928	1631.83	816.925	2	21	5.1.1.6552.18	66.7266	106966	31498.1	66.17	0.57	35377.7
1	26.07	26.07	36.69	tr|A0A287NA39	Uncharacterized protein OS=Hordeum vulgare subsp. vulgare OX=112509 PE=3 SV=1	0	99	VDLVDFVANHPFLF			cleaved F-L@C-term	0.00642594	1631.84	816.928	1631.83	816.925	2	20	5.1.1.6553.19	66.8254	106966	22248.1	66.17	0.57	25187.6
1	26.07	26.07	36.69	tr|A0A287NA39	Uncharacterized protein OS=Hordeum vulgare subsp. vulgare OX=112509 PE=3 SV=1	0	99	VDLVDFVANHPFLF			cleaved F-L@C-term	0.00642594	1631.84	816.928	1631.83	816.925	2	18	5.1.1.6554.19	66.9202	106966	15290.1	66.17	0.57	19157
1	26.07	26.07	36.69	tr|A0A287NA39	Uncharacterized protein OS=Hordeum vulgare subsp. vulgare OX=112509 PE=3 SV=1	0	99	VDLVDFVANHPFLF			cleaved F-L@C-term	0.00642594	1631.84	816.928	1631.83	816.925	2	18	5.1.1.6556.18	67.1053	106966	6212.89	66.17	0.57	14956.3
1	26.07	26.07	36.69	tr|A0A287NA39	Uncharacterized protein OS=Hordeum vulgare subsp. vulgare OX=112509 PE=3 SV=1	0	99	VDLVDFVANHPFLF			cleaved F-L@C-term	0.00642594	1631.84	816.928	1631.83	816.925	2	19	5.1.1.6557.16	67.1914	106966	4937.71	66.17	0.57	14502.6
1	26.07	26.07	36.69	tr|A0A287NA39	Uncharacterized protein OS=Hordeum vulgare subsp. vulgare OX=112509 PE=3 SV=1	0	99	VDLVDFVANHPFLF	Carbamidomethyl(H)@10		cleaved F-L@C-term	0.0038172	1688.86	563.961	1688.86	563.959	3	17	7.1.1.5440.3	62.3108	5513.25	5382.84	62.31	0.28	12838.3
1	26.07	26.07	36.69	tr|A0A287NA39	Uncharacterized protein OS=Hordeum vulgare subsp. vulgare OX=112509 PE=3 SV=1	0	99	VDLVDFVANHPFLF	Cation:Na(D)@5		cleaved F-L@C-term	0.0112246	1653.83	552.283	1653.82	552.28	3	17	7.1.1.5458.2	64.0063	4502.48	3888.14	64.09	0.38	8734.64
1	26.07	26.07	36.69	tr|A0A287NA39	Uncharacterized protein OS=Hordeum vulgare subsp. vulgare OX=112509 PE=3 SV=1	0	99	VDLVDFVANHPFLF			cleaved F-L@C-term	0.00196337	1631.84	816.926	1631.83	816.925	2	19	7.1.1.5467.17	64.917	222832	5911.43	64.09	0.38	16006.9
1	26.07	26.07	36.69	tr|A0A287NA39	Uncharacterized protein OS=Hordeum vulgare subsp. vulgare OX=112509 PE=3 SV=1	0	99	VDLVDFVANHPFLF			cleaved F-L@C-term	0.00196337	1631.84	816.926	1631.83	816.925	2	17	7.1.1.5472.17	65.3897	222832	2963.97	64.09	0.38	11070.7
1	26.07	26.07	36.69	tr|A0A287NA39	Uncharacterized protein OS=Hordeum vulgare subsp. vulgare OX=112509 PE=3 SV=1	0	99	VDLVDFVANHPFLF			cleaved F-L@C-term	0.00798878	1631.84	544.955	1631.83	544.952	3	14	7.1.1.5474.3	65.5205	156655	1618.5	64.09	0.38	5211.29
1	26.07	26.07	36.69	tr|A0A287NA39	Uncharacterized protein OS=Hordeum vulgare subsp. vulgare OX=112509 PE=3 SV=1	0	99	VDLVDFVANHPFLF			cleaved F-L@C-term	0.00604433	1631.84	816.928	1631.83	816.925	2	19	6.1.1.5707.17	66.2806	148495	2324.83	63.97	0.56	10646.5
1	26.07	26.07	36.69	tr|A0A287NA39	Uncharacterized protein OS=Hordeum vulgare subsp. vulgare OX=112509 PE=3 SV=1	0	99	VDLVDFVANHPFLF			cleaved F-L@C-term	0.00604433	1631.84	816.928	1631.83	816.925	2	19	6.1.1.5696.17	65.2403	148495	4553.31	63.97	0.56	12426.2
1	26.07	26.07	36.69	tr|A0A287NA39	Uncharacterized protein OS=Hordeum vulgare subsp. vulgare OX=112509 PE=3 SV=1	0	99	VDLVDFVANHPFLF	Carbamidomethyl(H)@10		cleaved F-L@C-term	0.0021694	1688.86	563.96	1688.86	563.959	3	19	7.1.1.5454.4	63.6378	30928	13380.9	63.43	0.19	23331.8
1	26.07	26.07	36.69	tr|A0A287NA39	Uncharacterized protein OS=Hordeum vulgare subsp. vulgare OX=112509 PE=3 SV=1	0	99	VDLVDFVANHPFLF			cleaved F-L@C-term	-0.00866043	1631.83	544.949	1631.83	544.952	3	15	6.1.1.5695.2	65.0834	97640.8	4324.58	63.97	0.56	6030.56
1	26.07	26.07	36.69	tr|A0A287NA39	Uncharacterized protein OS=Hordeum vulgare subsp. vulgare OX=112509 PE=3 SV=1	0	99	VDLVDFVANHPFLF			cleaved F-L@C-term	0.00196337	1631.84	816.926	1631.83	816.925	2	20	7.1.1.5465.18	64.732	222832	10763.6	64.09	0.38	22881.5
1	26.07	26.07	36.69	tr|A0A287NA39	Uncharacterized protein OS=Hordeum vulgare subsp. vulgare OX=112509 PE=3 SV=1	0	99	VDLVDFVANHPFLF			cleaved F-L@C-term	0.00196337	1631.84	816.926	1631.83	816.925	2	16	7.1.1.5470.16	65.1963	222832	3235.3	64.09	0.38	11686.5
1	26.07	26.07	36.69	tr|A0A287NA39	Uncharacterized protein OS=Hordeum vulgare subsp. vulgare OX=112509 PE=3 SV=1	0	99	VDLVDFVANHPFLF			cleaved F-L@C-term	0.00604433	1631.84	816.928	1631.83	816.925	2	19	6.1.1.5693.17	64.9569	148495	8051.72	63.97	0.56	14897.6
1	26.07	26.07	36.69	tr|A0A287NA39	Uncharacterized protein OS=Hordeum vulgare subsp. vulgare OX=112509 PE=3 SV=1	0	99	VDLVDFVANHPFLF			cleaved F-L@C-term	0.113179	1631.95	544.99	1631.83	544.952	3	12	3.1.1.2596.2	62.9554	23506.8	6984.44	62.58	0.57	6597.83
1	26.07	26.07	36.69	tr|A0A287NA39	Uncharacterized protein OS=Hordeum vulgare subsp. vulgare OX=112509 PE=3 SV=1	0	99	VDLVDFVANHPFLF	Cation:Na(D)@5		cleaved F-L@C-term	0.0112246	1653.83	552.283	1653.82	552.28	3	16	7.1.1.5460.2	64.1934	4502.48	4186.2	64.09	0.38	9186.16
1	26.07	26.07	36.69	tr|A0A287NA39	Uncharacterized protein OS=Hordeum vulgare subsp. vulgare OX=112509 PE=3 SV=1	0	99	VDLVDFVANHPFLF			cleaved F-L@C-term	0.00196337	1631.84	816.926	1631.83	816.925	2	20	7.1.1.5464.18	64.6375	222832	16077.2	64.09	0.38	27976.4
1	26.07	26.07	36.69	tr|A0A287NA39	Uncharacterized protein OS=Hordeum vulgare subsp. vulgare OX=112509 PE=3 SV=1	0	99	VDLVDFVANHPFLF			cleaved F-L@C-term	0.00604433	1631.84	816.928	1631.83	816.925	2	20	6.1.1.5691.17	64.7679	148495	14997.2	63.97	0.56	21363.8
1	26.07	26.07	36.69	tr|A0A287NA39	Uncharacterized protein OS=Hordeum vulgare subsp. vulgare OX=112509 PE=3 SV=1	0	99	VDLVDFVANHPFLF			cleaved F-L@C-term	0.00604433	1631.84	816.928	1631.83	816.925	2	17	6.1.1.5697.17	65.3347	148495	3829.21	63.97	0.56	12418.8
1	26.07	26.07	36.69	tr|A0A287NA39	Uncharacterized protein OS=Hordeum vulgare subsp. vulgare OX=112509 PE=3 SV=1	0	98.74	VDLVDFVANHPFLF			cleaved F-L@C-term	0.00196337	1631.84	816.926	1631.83	816.925	2	21	7.1.1.5463.18	64.5427	222832	25558.9	64.09	0.38	39664.1
1	26.07	26.07	36.69	tr|A0A287NA39	Uncharacterized protein OS=Hordeum vulgare subsp. vulgare OX=112509 PE=3 SV=1	0	98.74	VDLVDFVANHPFLF			cleaved F-L@C-term	0.00196337	1631.84	816.926	1631.83	816.925	2	20	7.1.1.5466.15	64.8141	222832	8175.49	64.09	0.38	19641.5
1	26.07	26.07	36.69	tr|A0A287NA39	Uncharacterized protein OS=Hordeum vulgare subsp. vulgare OX=112509 PE=3 SV=1	0	98.74	VDLVDFVANHPFLF			cleaved F-L@C-term	0.00196337	1631.84	816.926	1631.83	816.925	2	16	7.1.1.5468.17	65.0113	222832	4428.82	64.09	0.38	13773
1	26.07	26.07	36.69	tr|A0A287NA39	Uncharacterized protein OS=Hordeum vulgare subsp. vulgare OX=112509 PE=3 SV=1	0	96.74	VDLVDFVANHPFLF	Carbamidomethyl(H)@10		cleaved F-L@C-term	-0.00812118	1688.85	563.957	1688.86	563.959	3	18	6.1.1.5674.2	63.1032	12253.3	11159.7	63.38	0.56	13542.5
1	26.07	26.07	36.69	tr|A0A287NA39	Uncharacterized protein OS=Hordeum vulgare subsp. vulgare OX=112509 PE=3 SV=1	0	96.74	VDLVDFVANHPFLF	Cation:Na(D)@5		cleaved F-L@C-term	0.00175109	1653.82	552.28	1653.82	552.28	3	17	6.1.1.5683.2	63.9497	2941.3	2787.33	64.17	0.85	10214.2
1	26.07	26.07	36.69	tr|A0A287NA39	Uncharacterized protein OS=Hordeum vulgare subsp. vulgare OX=112509 PE=3 SV=1	0	96.74	VDLVDFVANHPFLF	Cation:Na(D)@5		cleaved F-L@C-term	0.00175109	1653.82	552.28	1653.82	552.28	3	17	6.1.1.5685.2	64.138	2941.3	2893.71	64.17	0.85	10267.7
1	26.07	26.07	36.69	tr|A0A287NA39	Uncharacterized protein OS=Hordeum vulgare subsp. vulgare OX=112509 PE=3 SV=1	0	96.74	VDLVDFVANHPFLF			cleaved F-L@C-term	0.00604433	1631.84	816.928	1631.83	816.925	2	20	6.1.1.5689.19	64.5867	148495	46374.9	63.97	0.56	29537.3
1	26.07	26.07	36.69	tr|A0A287NA39	Uncharacterized protein OS=Hordeum vulgare subsp. vulgare OX=112509 PE=3 SV=1	0	96.74	VDLVDFVANHPFLF			cleaved F-L@C-term	0.00604433	1631.84	816.928	1631.83	816.925	2	19	6.1.1.5690.18	64.6773	148495	30697.7	63.97	0.56	25023.9
1	26.07	26.07	36.69	tr|A0A287NA39	Uncharacterized protein OS=Hordeum vulgare subsp. vulgare OX=112509 PE=3 SV=1	0	96.74	VDLVDFVANHPFLF			cleaved F-L@C-term	0.00604433	1631.84	816.928	1631.83	816.925	2	16	6.1.1.5694.16	65.0472	148495	6329.62	63.97	0.56	13519
1	26.07	26.07	36.69	tr|A0A287NA39	Uncharacterized protein OS=Hordeum vulgare subsp. vulgare OX=112509 PE=3 SV=1	0	96.74	VDLVDFVANHPFLF			cleaved F-L@C-term	0.00543402	1631.84	816.927	1631.83	816.925	2	16	6.1.1.5742.19	69.6008	1082.55	638.39	71.03	2.84	7285.6
1	26.07	26.07	36.69	tr|A0A287NA39	Uncharacterized protein OS=Hordeum vulgare subsp. vulgare OX=112509 PE=3 SV=1	0	92.61	VDLVDFVANHPFLF	Cation:Na(D)@5		cleaved F-L@C-term	0.00175109	1653.82	552.28	1653.82	552.28	3	17	6.1.1.5684.2	64.0436	2941.3	2840.42	64.17	0.85	10847
1	26.07	26.07	36.69	tr|A0A287NA39	Uncharacterized protein OS=Hordeum vulgare subsp. vulgare OX=112509 PE=3 SV=1	0	92.61	VDLVDFVANHPFLF			cleaved F-L@C-term	0.00604433	1631.84	816.928	1631.83	816.925	2	21	6.1.1.5688.17	64.4837	148495	66769.8	63.97	0.56	38460.1
1	26.07	26.07	36.69	tr|A0A287NA39	Uncharacterized protein OS=Hordeum vulgare subsp. vulgare OX=112509 PE=3 SV=1	0	92.61	VDLVDFVANHPFLF			cleaved F-L@C-term	0.00604433	1631.84	816.928	1631.83	816.925	2	17	6.1.1.5692.16	64.8583	148495	9932.74	63.97	0.56	17509.7
1	26.07	26.07	36.69	tr|A0A287NA39	Uncharacterized protein OS=Hordeum vulgare subsp. vulgare OX=112509 PE=3 SV=1	0	92.61	VDLVDFVANHPFLF			cleaved F-L@C-term	0.00604433	1631.84	816.928	1631.83	816.925	2	17	6.1.1.5699.17	65.5238	148495	3407.64	63.97	0.56	11886.5
1	26.07	26.07	36.69	tr|A0A287NA39	Uncharacterized protein OS=Hordeum vulgare subsp. vulgare OX=112509 PE=3 SV=1	0	92.61	VDLVDFVANHPFLF			cleaved F-L@C-term	0.00604433	1631.84	816.928	1631.83	816.925	2	16	6.1.1.5706.17	66.186	148495	2513.46	63.97	0.56	11754.3
1	26.07	26.07	36.69	tr|A0A287NA39	Uncharacterized protein OS=Hordeum vulgare subsp. vulgare OX=112509 PE=3 SV=1	0	90.75	VDLVDFVANHPFLF	Carbamidomethyl@N-term		cleaved F-L@C-term	0.0071128	1688.86	563.962	1688.86	563.959	3	12	7.1.1.5464.2	64.5708	14280.2	3082.68	64.19	0.28	7359.6
1	26.07	26.07	36.69	tr|A0A287NA39	Uncharacterized protein OS=Hordeum vulgare subsp. vulgare OX=112509 PE=3 SV=1	0	84.69	VDLVDFVANHPFLF	Cation:Na(D)@5		cleaved F-L@C-term	0.082101	1653.9	552.307	1653.82	552.28	3	18	8.1.1.5748.2	64.3593	5668.87	5272.84	64.26	0.38	10360.6
1	26.07	26.07	36.69	tr|A0A287NA39	Uncharacterized protein OS=Hordeum vulgare subsp. vulgare OX=112509 PE=3 SV=1	0	84.69	VDLVDFVANHPFLF			cleaved F-L@C-term	0.104525	1631.94	816.977	1631.83	816.925	2	18	8.1.1.5757.19	65.2818	253255	6047.25	64.26	0.38	17201.7
1	26.07	26.07	36.69	tr|A0A287NA39	Uncharacterized protein OS=Hordeum vulgare subsp. vulgare OX=112509 PE=3 SV=1	0	84.69	VDLVDFVANHPFLF			cleaved F-L@C-term	0.104525	1631.94	816.977	1631.83	816.925	2	17	8.1.1.5758.20	65.3806	253255	5056.59	64.26	0.38	15967.9
1	26.07	26.07	36.69	tr|A0A287NA39	Uncharacterized protein OS=Hordeum vulgare subsp. vulgare OX=112509 PE=3 SV=1	0	84.69	VDLVDFVANHPFLF			cleaved F-L@C-term	0.0849807	1631.92	544.981	1631.83	544.952	3	14	8.1.1.5760.2	65.4949	167281	2105.38	64.26	0.38	7061.09
1	26.07	26.07	36.69	tr|A0A287NA39	Uncharacterized protein OS=Hordeum vulgare subsp. vulgare OX=112509 PE=3 SV=1	0	68.46	VDLVDFVANHPFLF			cleaved F-L@C-term	0.00604433	1631.84	816.928	1631.83	816.925	2	21	6.1.1.5687.17	64.3893	148495	94194.6	63.97	0.56	61161.5
1	26.07	26.07	36.69	tr|A0A287NA39	Uncharacterized protein OS=Hordeum vulgare subsp. vulgare OX=112509 PE=3 SV=1	0	56.97	VDLVDFVANHPFLF	Cation:Na(D)@5		cleaved F-L@C-term	0.082101	1653.9	552.307	1653.82	552.28	3	17	8.1.1.5746.2	64.1707	5668.87	4584.87	64.26	0.38	9651.67
1	26.07	26.07	36.69	tr|A0A287NA39	Uncharacterized protein OS=Hordeum vulgare subsp. vulgare OX=112509 PE=3 SV=1	0	56.97	VDLVDFVANHPFLF			cleaved F-L@C-term	0.104525	1631.94	816.977	1631.83	816.925	2	18	8.1.1.5759.19	65.4711	253255	4236.59	64.26	0.38	15068.1
1	26.07	26.07	36.69	tr|A0A287NA39	Uncharacterized protein OS=Hordeum vulgare subsp. vulgare OX=112509 PE=3 SV=1	0	46.57	VDLVDFVANHPFLF			cleaved F-L@C-term	0.00604433	1631.84	816.928	1631.83	816.925	2	22	6.1.1.5681.15	63.8154	148495	126236	63.97	0.56	216397
1	26.07	26.07	36.69	tr|A0A287NA39	Uncharacterized protein OS=Hordeum vulgare subsp. vulgare OX=112509 PE=3 SV=1	0	46.57	VDLVDFVANHPFLF			cleaved F-L@C-term	0.00604433	1631.84	816.928	1631.83	816.925	2	23	6.1.1.5686.17	64.2951	148495	121566	63.97	0.56	107695
1	26.07	26.07	36.69	tr|A0A287NA39	Uncharacterized protein OS=Hordeum vulgare subsp. vulgare OX=112509 PE=3 SV=1	0	46	VDLVDFVANHPFLF			cleaved F-L@C-term	0.00642594	1631.84	816.928	1631.83	816.925	2	22	5.1.1.6543.17	65.8715	106966	81015.1	66.17	0.57	94535.5
1	26.07	26.07	36.69	tr|A0A287NA39	Uncharacterized protein OS=Hordeum vulgare subsp. vulgare OX=112509 PE=3 SV=1	0	46	VDLVDFVANHPFLF			cleaved F-L@C-term	0.00642594	1631.84	816.928	1631.83	816.925	2	22	5.1.1.6546.16	66.1509	106966	104975	66.17	0.57	198095
1	26.07	26.07	36.69	tr|A0A287NA39	Uncharacterized protein OS=Hordeum vulgare subsp. vulgare OX=112509 PE=3 SV=1	0	46	VDLVDFVANHPFLF			cleaved F-L@C-term	0.00642594	1631.84	816.928	1631.83	816.925	2	22	5.1.1.6549.17	66.4387	106966	83103.1	66.17	0.57	93584.5
1	26.07	26.07	36.69	tr|A0A287NA39	Uncharacterized protein OS=Hordeum vulgare subsp. vulgare OX=112509 PE=3 SV=1	0	43.4	VDLVDFVANHPFLF	Carbamidomethyl(H)@10		cleaved F-L@C-term	0.00111836	1688.86	563.96	1688.86	563.959	3	16	5.1.1.6545.2	65.9981	9232.87	7219.56	65.36	1.13	10728.5
1	26.07	26.07	36.69	tr|A0A287NA39	Uncharacterized protein OS=Hordeum vulgare subsp. vulgare OX=112509 PE=3 SV=1	0	43.4	VDLVDFVANHPFLF			cleaved F-L@C-term	0.00642594	1631.84	816.928	1631.83	816.925	2	22	5.1.1.6550.13	66.5165	106966	70654.8	66.17	0.57	73815.6
1	26.07	26.07	36.69	tr|A0A287NA39	Uncharacterized protein OS=Hordeum vulgare subsp. vulgare OX=112509 PE=3 SV=1	0	37.37	VDLVDFVANHPFLF			cleaved F-L@C-term	0.00642594	1631.84	816.928	1631.83	816.925	2	21	5.1.1.6551.16	66.6236	106966	50694.2	66.17	0.57	51066.4
1	26.07	26.07	36.69	tr|A0A287NA39	Uncharacterized protein OS=Hordeum vulgare subsp. vulgare OX=112509 PE=3 SV=1	0	24.46	VDLVDFVANHPFLF			cleaved F-L@C-term	0.00604433	1631.84	816.928	1631.83	816.925	2	22	6.1.1.5680.18	63.7338	148495	111616	63.97	0.56	130452
1	26.07	26.07	36.69	tr|A0A287NA39	Uncharacterized protein OS=Hordeum vulgare subsp. vulgare OX=112509 PE=3 SV=1	0	24.46	VDLVDFVANHPFLF	Cation:Na(D)@5		cleaved F-L@C-term	0.00175109	1653.82	552.28	1653.82	552.28	3	14	6.1.1.5682.2	63.8554	2941.3	2475.3	64.17	0.85	9252.35
1	26.07	26.07	36.69	tr|A0A287NA39	Uncharacterized protein OS=Hordeum vulgare subsp. vulgare OX=112509 PE=3 SV=1	0	20.34	VDLVDFVANHPFLF	Cation:Na(D)@5		cleaved F-L@C-term	0.0112246	1653.83	552.283	1653.82	552.28	3	15	7.1.1.5459.2	64.0998	4502.48	4484.13	64.09	0.38	9614.42
1	26.07	26.07	36.69	tr|A0A287NA39	Uncharacterized protein OS=Hordeum vulgare subsp. vulgare OX=112509 PE=3 SV=1	0	20.34	VDLVDFVANHPFLF	Cation:Na(D)@5		cleaved F-L@C-term	0.0112246	1653.83	552.283	1653.82	552.28	3	15	7.1.1.5461.2	64.2872	4502.48	2891.69	64.09	0.38	7581.36
2	18.26	18.26	18.21	tr|Q7DMU0	Storage protein OS=Triticum aestivum OX=4565 GN=Gbl1 PE=4 SV=1; Embryo globulin OS=Hordeum vulgare OX=4513 GN=Beg1 PE=2 SV=1	2	99	AFVVPGFTDADGVGYVAQGEGVLTVIENGEK				0.187645	3137.74	785.443	3137.56	785.396	4	20	7.1.1.5424.15	60.847	11858.8	5403.02	60.5	0.47	26552.9
2	18.26	18.26	18.21	tr|Q7DMU0	Storage protein OS=Triticum aestivum OX=4565 GN=Gbl1 PE=4 SV=1; Embryo globulin OS=Hordeum vulgare OX=4513 GN=Beg1 PE=2 SV=1	2	99	ALRPFDQVSR				0.0427233	1187.68	396.902	1187.64	396.888	3	11	8.1.1.5450.2	36.1075	421.53	394.94	36.01	0.28	1455.17
2	18.26	18.26	18.21	tr|Q7DMU0	Storage protein OS=Triticum aestivum OX=4565 GN=Gbl1 PE=4 SV=1; Embryo globulin OS=Hordeum vulgare OX=4513 GN=Beg1 PE=2 SV=1	2	99	FQFLSVKPLLASLSK				0.0921667	1677.08	560.034	1676.99	560.003	3	17	7.1.1.5412.2	59.6568	3281.33	3239.72	59.65	0.19	12252.5
2	18.26	18.26	18.21	tr|Q7DMU0	Storage protein OS=Triticum aestivum OX=4565 GN=Gbl1 PE=4 SV=1; Embryo globulin OS=Hordeum vulgare OX=4513 GN=Beg1 PE=2 SV=1	2	99	IIQSDHGFVR				0.0445837	1170.66	391.227	1170.61	391.212	3	9	8.1.1.5410.2	32.3331	538.17	470.58	32.42	0.28	1365.42
2	18.26	18.26	18.21	tr|Q7DMU0	Storage protein OS=Triticum aestivum OX=4565 GN=Gbl1 PE=4 SV=1; Embryo globulin OS=Hordeum vulgare OX=4513 GN=Beg1 PE=2 SV=1	2	99	ILHTISVPGK				0.036853	1063.68	355.566	1063.64	355.554	3	9	8.1.1.5460.3	37.0571	942.87	860.13	36.96	0.28	1715.68
2	18.26	18.26	18.21	tr|Q7DMU0	Storage protein OS=Triticum aestivum OX=4565 GN=Gbl1 PE=4 SV=1; Embryo globulin OS=Hordeum vulgare OX=4513 GN=Beg1 PE=2 SV=1	2	99	LAVVLEGEGEVQIVCPH	Carbamidomethyl(C)@15		cleaved H-L@C-term	-0.00706144	1847.94	616.987	1847.95	616.989	3	20	5.1.1.6650.7	75.969	36.1536	36.1536			6931.59
2	18.26	18.26	18.21	tr|Q7DMU0	Storage protein OS=Triticum aestivum OX=4565 GN=Gbl1 PE=4 SV=1; Embryo globulin OS=Hordeum vulgare OX=4513 GN=Beg1 PE=2 SV=1	2	99	LAVVLEGEGEVQIVCPHLGR	Carbamidomethyl(C)@15			0.123456	2174.28	725.766	2174.15	725.725	3	25	7.1.1.5394.12	57.9916	10142.9	7380.91	58.6	2.28	27635.2
2	18.26	18.26	18.21	tr|Q7DMU0	Storage protein OS=Triticum aestivum OX=4565 GN=Gbl1 PE=4 SV=1; Embryo globulin OS=Hordeum vulgare OX=4513 GN=Beg1 PE=2 SV=1	2	99	SFHALANQDVR				0.0522435	1256.68	419.9	1256.63	419.883	3	12	8.1.1.5431.4	34.321	523.92	371.19	34.59	0.94	1043.34
2	18.26	18.26	18.21	tr|Q7DMU0	Storage protein OS=Triticum aestivum OX=4565 GN=Gbl1 PE=4 SV=1; Embryo globulin OS=Hordeum vulgare OX=4513 GN=Beg1 PE=2 SV=1	2	99	VAIMEVNPR				0.0554049	1027.6	514.809	1027.55	514.781	2	12	8.1.1.5470.7	38.0195	671.67	660.58	38.08	0.28	3791.74
2	18.26	18.26	18.21	tr|Q7DMU0	Storage protein OS=Triticum aestivum OX=4565 GN=Gbl1 PE=4 SV=1; Embryo globulin OS=Hordeum vulgare OX=4513 GN=Beg1 PE=2 SV=1	0.226945	51.43	EGDVIVAPAGSIMHLANTDGR				0.124683	2122.17	708.398	2122.05	708.357	3	25	7.1.1.5187.8	38.3622	30925.3	27621.6	38.52	0.76	94014.2
2	18.26	18.26	18.21	tr|Q7DMU0	Storage protein OS=Triticum aestivum OX=4565 GN=Gbl1 PE=4 SV=1; Embryo globulin OS=Hordeum vulgare OX=4513 GN=Beg1 PE=2 SV=1	0.0376307	99	VAQGEGVLTVIENGEK	Deamidated(N)@13		cleaved Y-V@N-term	0.0998769	1642.94	822.478	1642.84	822.428	2	23	8.1.1.5497.12	40.5974	75405.2	19373.2	40.17	0.28	39316.8
2	18.26	18.26	18.21	tr|Q7DMU0	Storage protein OS=Triticum aestivum OX=4565 GN=Gbl1 PE=4 SV=1; Embryo globulin OS=Hordeum vulgare OX=4513 GN=Beg1 PE=2 SV=1	0	45.08	AFVVPGFTDADGVGY			cleaved Y-V@C-term	0.0920888	1513.8	757.908	1513.71	757.862	2	8	8.1.1.5399.11	31.3721	349.35	340.29	31.56	0.76	1161.6
2	18.26	18.26	18.21	tr|Q7DMU0	Storage protein OS=Triticum aestivum OX=4565 GN=Gbl1 PE=4 SV=1; Embryo globulin OS=Hordeum vulgare OX=4513 GN=Beg1 PE=2 SV=1	0	43.2	AFVVPGFTDADGVGY			cleaved Y-V@C-term	0.0920888	1513.8	757.908	1513.71	757.862	2	10	8.1.1.5400.8	31.4662	349.35	347.44	31.56	0.76	1091.06
2	18.26	18.26	18.21	tr|Q7DMU0	Storage protein OS=Triticum aestivum OX=4565 GN=Gbl1 PE=4 SV=1; Embryo globulin OS=Hordeum vulgare OX=4513 GN=Beg1 PE=2 SV=1	0	39.52	AFVVPGFTDADGVGY			cleaved Y-V@C-term	0.0887929	1513.8	757.906	1513.71	757.862	2	11	7.1.1.5085.7	28.7191	416.28	412.01	28.72	0.76	1675.82
2	18.26	18.26	18.21	tr|Q7DMU0	Storage protein OS=Triticum aestivum OX=4565 GN=Gbl1 PE=4 SV=1; Embryo globulin OS=Hordeum vulgare OX=4513 GN=Beg1 PE=2 SV=1	0	99	AFVVPGFTDADGVGYVAQGEGVLTVIENGEK	Deamidated(N)@28			0.220671	3138.76	1047.26	3138.54	1047.19	3	22	7.1.1.5407.19	59.2535	5869.24	3544.47	59.07	0.66	21810
2	18.26	18.26	18.21	tr|Q7DMU0	Storage protein OS=Triticum aestivum OX=4565 GN=Gbl1 PE=4 SV=1; Embryo globulin OS=Hordeum vulgare OX=4513 GN=Beg1 PE=2 SV=1	0	99	AFVVPGFTDADGVGYVAQGEGVLTVIENGEK				0.22434	3137.78	1046.93	3137.56	1046.86	3	25	7.1.1.5421.21	60.5888	21479.3	19212.4	60.5	0.47	57402.6
2	18.26	18.26	18.21	tr|Q7DMU0	Storage protein OS=Triticum aestivum OX=4565 GN=Gbl1 PE=4 SV=1; Embryo globulin OS=Hordeum vulgare OX=4513 GN=Beg1 PE=2 SV=1	0	99	AFVVPGFTDADGVGYVAQGEGVLTVIENGEK				0.22434	3137.78	1046.93	3137.56	1046.86	3	22	7.1.1.5427.20	61.1514	21479.3	5544.11	60.5	0.47	22885.3
2	18.26	18.26	18.21	tr|Q7DMU0	Storage protein OS=Triticum aestivum OX=4565 GN=Gbl1 PE=4 SV=1; Embryo globulin OS=Hordeum vulgare OX=4513 GN=Beg1 PE=2 SV=1	0	99	AFVVPGFTDADGVGYVAQGEGVLTVIENGEK				0.22434	3137.78	1046.93	3137.56	1046.86	3	24	7.1.1.5420.20	60.4902	21479.3	21192.1	60.5	0.47	68094.4
2	18.26	18.26	18.21	tr|Q7DMU0	Storage protein OS=Triticum aestivum OX=4565 GN=Gbl1 PE=4 SV=1; Embryo globulin OS=Hordeum vulgare OX=4513 GN=Beg1 PE=2 SV=1	0	99	AFVVPGFTDADGVGYVAQGEGVLTVIENGEK				0.22434	3137.78	1046.93	3137.56	1046.86	3	21	7.1.1.5423.20	60.7735	21479.3	11178.1	60.5	0.47	36951.5
2	18.26	18.26	18.21	tr|Q7DMU0	Storage protein OS=Triticum aestivum OX=4565 GN=Gbl1 PE=4 SV=1; Embryo globulin OS=Hordeum vulgare OX=4513 GN=Beg1 PE=2 SV=1	0	99	AFVVPGFTDADGVGYVAQGEGVLTVIENGEK				0.19033	3137.75	785.444	3137.56	785.396	4	21	8.1.1.5713.16	61.1086	17093.8	10011.5	60.86	0.38	40964.4
2	18.26	18.26	18.21	tr|Q7DMU0	Storage protein OS=Triticum aestivum OX=4565 GN=Gbl1 PE=4 SV=1; Embryo globulin OS=Hordeum vulgare OX=4513 GN=Beg1 PE=2 SV=1	0	97.59	AFVVPGFTDADGVGYVAQGEGVLTVIENGEK				0.21079	3137.77	1046.93	3137.56	1046.86	3	24	8.1.1.5712.21	61.0349	30024.9	20718.3	60.86	0.28	57800.9
2	18.26	18.26	18.21	tr|Q7DMU0	Storage protein OS=Triticum aestivum OX=4565 GN=Gbl1 PE=4 SV=1; Embryo globulin OS=Hordeum vulgare OX=4513 GN=Beg1 PE=2 SV=1	0	97.59	AFVVPGFTDADGVGYVAQGEGVLTVIENGEK				0.19033	3137.75	785.444	3137.56	785.396	4	20	8.1.1.5719.18	61.6846	17093.8	3605	60.86	0.38	27949.5
2	18.26	18.26	18.21	tr|Q7DMU0	Storage protein OS=Triticum aestivum OX=4565 GN=Gbl1 PE=4 SV=1; Embryo globulin OS=Hordeum vulgare OX=4513 GN=Beg1 PE=2 SV=1	0	96.11	AFVVPGFTDADGVGYVAQGEGVLTVIENGEK				0.21079	3137.77	1046.93	3137.56	1046.86	3	23	8.1.1.5711.20	60.9362	30024.9	28809.3	60.86	0.28	79584.3
2	18.26	18.26	18.21	tr|Q7DMU0	Storage protein OS=Triticum aestivum OX=4565 GN=Gbl1 PE=4 SV=1; Embryo globulin OS=Hordeum vulgare OX=4513 GN=Beg1 PE=2 SV=1	0	24.36	AFVVPGFTDADGVGYVAQGEGVLTVIENGEK				0.22434	3137.78	1046.93	3137.56	1046.86	3	21	7.1.1.5422.21	60.6832	21479.3	14801.8	60.5	0.47	45417.5
2	18.26	18.26	18.21	tr|Q7DMU0	Storage protein OS=Triticum aestivum OX=4565 GN=Gbl1 PE=4 SV=1; Embryo globulin OS=Hordeum vulgare OX=4513 GN=Beg1 PE=2 SV=1	0	99	ALRPFDQVSR				0.0427233	1187.68	396.902	1187.64	396.888	3	13	8.1.1.5449.2	36.0129	421.53	420.15	36.01	0.28	1139.1
2	18.26	18.26	18.21	tr|Q7DMU0	Storage protein OS=Triticum aestivum OX=4565 GN=Gbl1 PE=4 SV=1; Embryo globulin OS=Hordeum vulgare OX=4513 GN=Beg1 PE=2 SV=1	0	44.52	EGDVIVAPAGSIMHLANTDGR				0.124683	2122.17	708.398	2122.05	708.357	3	24	7.1.1.5189.10	38.5607	30925.3	30596.6	38.52	0.76	93666.7
2	18.26	18.26	18.21	tr|Q7DMU0	Storage protein OS=Triticum aestivum OX=4565 GN=Gbl1 PE=4 SV=1; Embryo globulin OS=Hordeum vulgare OX=4513 GN=Beg1 PE=2 SV=1	0	39.52	EGDVIVAPAGSIMHLANTDGR				0.124683	2122.17	708.398	2122.05	708.357	3	23	7.1.1.5188.9	38.4614	30925.3	30124.7	38.52	0.76	92908.2
2	18.26	18.26	18.21	tr|Q7DMU0	Storage protein OS=Triticum aestivum OX=4565 GN=Gbl1 PE=4 SV=1; Embryo globulin OS=Hordeum vulgare OX=4513 GN=Beg1 PE=2 SV=1	0	29.63	EGDVIVAPAGSIMHLANTDGR				0.124683	2122.17	708.398	2122.05	708.357	3	24	7.1.1.5190.11	38.6594	30925.3	29211.2	38.52	0.76	90831.1
2	18.26	18.26	18.21	tr|Q7DMU0	Storage protein OS=Triticum aestivum OX=4565 GN=Gbl1 PE=4 SV=1; Embryo globulin OS=Hordeum vulgare OX=4513 GN=Beg1 PE=2 SV=1	0	99	FQFLSVKPLLASLSK				0.0800817	1677.07	560.029	1676.99	560.003	3	19	8.1.1.5710.2	60.7662	8734.63	8327	60.84	0.28	22493.8
2	18.26	18.26	18.21	tr|Q7DMU0	Storage protein OS=Triticum aestivum OX=4565 GN=Gbl1 PE=4 SV=1; Embryo globulin OS=Hordeum vulgare OX=4513 GN=Beg1 PE=2 SV=1	0	99	FQFLSVKPLLASLSK				0.0800817	1677.07	560.029	1676.99	560.003	3	20	8.1.1.5711.2	60.8612	8734.63	8379.26	60.84	0.28	19757.2
2	18.26	18.26	18.21	tr|Q7DMU0	Storage protein OS=Triticum aestivum OX=4565 GN=Gbl1 PE=4 SV=1; Embryo globulin OS=Hordeum vulgare OX=4513 GN=Beg1 PE=2 SV=1	0	99	FQFLSVKPLLASLSK				0.0916173	1677.08	560.033	1676.99	560.003	3	17	8.1.1.5611.4	51.3902	6932.42	5790	51.56	0.47	20730
2	18.26	18.26	18.21	tr|Q7DMU0	Storage protein OS=Triticum aestivum OX=4565 GN=Gbl1 PE=4 SV=1; Embryo globulin OS=Hordeum vulgare OX=4513 GN=Beg1 PE=2 SV=1	0	76.9	FQFLSVKPLLASLSK				0.0916173	1677.08	560.033	1676.99	560.003	3	16	8.1.1.5610.3	51.2913	6932.42	3645.51	51.56	0.47	17137.5
2	18.26	18.26	18.21	tr|Q7DMU0	Storage protein OS=Triticum aestivum OX=4565 GN=Gbl1 PE=4 SV=1; Embryo globulin OS=Hordeum vulgare OX=4513 GN=Beg1 PE=2 SV=1	0	98.22	IIQSDHGFVR				0.041654	1170.66	391.226	1170.61	391.212	3	9	7.1.1.5096.3	29.6865	469.54	441.39	29.66	0.28	1442.67
2	18.26	18.26	18.21	tr|Q7DMU0	Storage protein OS=Triticum aestivum OX=4565 GN=Gbl1 PE=4 SV=1; Embryo globulin OS=Hordeum vulgare OX=4513 GN=Beg1 PE=2 SV=1	0	95.44	IIQSDHGFVR				0.0431189	1170.66	391.226	1170.61	391.212	3	10	5.1.1.6217.6	34.5438	338.86	327.3	34.74	0.57	1828.69
2	18.26	18.26	18.21	tr|Q7DMU0	Storage protein OS=Triticum aestivum OX=4565 GN=Gbl1 PE=4 SV=1; Embryo globulin OS=Hordeum vulgare OX=4513 GN=Beg1 PE=2 SV=1	0	91.53	IIQSDHGFVR				0.041654	1170.66	391.226	1170.61	391.212	3	9	7.1.1.5095.3	29.5919	469.54	467.65	29.66	0.28	1491.67
2	18.26	18.26	18.21	tr|Q7DMU0	Storage protein OS=Triticum aestivum OX=4565 GN=Gbl1 PE=4 SV=1; Embryo globulin OS=Hordeum vulgare OX=4513 GN=Beg1 PE=2 SV=1	0	90.32	IIQSDHGFVR				0.0431189	1170.66	391.226	1170.61	391.212	3	10	5.1.1.6215.5	34.3507	338.86	285.2	34.74	0.57	1840.62
2	18.26	18.26	18.21	tr|Q7DMU0	Storage protein OS=Triticum aestivum OX=4565 GN=Gbl1 PE=4 SV=1; Embryo globulin OS=Hordeum vulgare OX=4513 GN=Beg1 PE=2 SV=1	0	75.79	IIQSDHGFVR				0.0431189	1170.66	391.226	1170.61	391.212	3	7	5.1.1.6218.7	34.6427	338.86	331.75	34.74	0.57	1652.42
2	18.26	18.26	18.21	tr|Q7DMU0	Storage protein OS=Triticum aestivum OX=4565 GN=Gbl1 PE=4 SV=1; Embryo globulin OS=Hordeum vulgare OX=4513 GN=Beg1 PE=2 SV=1	0	75.08	IIQSDHGFVR				0.0445837	1170.66	391.227	1170.61	391.212	3	9	6.1.1.5332.3	30.5269	206.66	204.04	30.73	0.57	1517.17
2	18.26	18.26	18.21	tr|Q7DMU0	Storage protein OS=Triticum aestivum OX=4565 GN=Gbl1 PE=4 SV=1; Embryo globulin OS=Hordeum vulgare OX=4513 GN=Beg1 PE=2 SV=1	0	66.27	IIQSDHGFVR				0.0431189	1170.66	391.226	1170.61	391.212	3	8	5.1.1.6216.7	34.4534	338.86	310.48	34.74	0.57	2148.94
2	18.26	18.26	18.21	tr|Q7DMU0	Storage protein OS=Triticum aestivum OX=4565 GN=Gbl1 PE=4 SV=1; Embryo globulin OS=Hordeum vulgare OX=4513 GN=Beg1 PE=2 SV=1	0	49.11	IIQSDHGFVR				0.0445837	1170.66	391.227	1170.61	391.212	3	9	8.1.1.5411.4	32.4362	538.17	518.36	32.42	0.28	1482.42
2	18.26	18.26	18.21	tr|Q7DMU0	Storage protein OS=Triticum aestivum OX=4565 GN=Gbl1 PE=4 SV=1; Embryo globulin OS=Hordeum vulgare OX=4513 GN=Beg1 PE=2 SV=1	0	49.11	IIQSDHGFVR				0.0445837	1170.66	391.227	1170.61	391.212	3	7	8.1.1.5413.3	32.6205	538.17	286.24	32.42	0.28	989.907
2	18.26	18.26	18.21	tr|Q7DMU0	Storage protein OS=Triticum aestivum OX=4565 GN=Gbl1 PE=4 SV=1; Embryo globulin OS=Hordeum vulgare OX=4513 GN=Beg1 PE=2 SV=1	0	41.05	IIQSDHGFVR				0.0445837	1170.66	391.227	1170.61	391.212	3	7	8.1.1.5412.3	32.5265	538.17	417.93	32.42	0.28	1127.97
2	18.26	18.26	18.21	tr|Q7DMU0	Storage protein OS=Triticum aestivum OX=4565 GN=Gbl1 PE=4 SV=1; Embryo globulin OS=Hordeum vulgare OX=4513 GN=Beg1 PE=2 SV=1	0	99	ILHTISVPGK				0.0363037	1063.68	355.566	1063.64	355.554	3	13	5.1.1.6243.2	36.9882	1061.54	1054.36	37.22	0.57	3699.74
2	18.26	18.26	18.21	tr|Q7DMU0	Storage protein OS=Triticum aestivum OX=4565 GN=Gbl1 PE=4 SV=1; Embryo globulin OS=Hordeum vulgare OX=4513 GN=Beg1 PE=2 SV=1	0	99	ILHTISVPGK				0.0363037	1063.68	355.566	1063.64	355.554	3	14	5.1.1.6244.3	37.0873	1061.54	1061.17	37.22	0.57	5086.78
2	18.26	18.26	18.21	tr|Q7DMU0	Storage protein OS=Triticum aestivum OX=4565 GN=Gbl1 PE=4 SV=1; Embryo globulin OS=Hordeum vulgare OX=4513 GN=Beg1 PE=2 SV=1	0	99	LAVVLEGEGEVQIVCPH	Carbamidomethyl(C)@15		cleaved H-L@C-term	-0.00266725	1847.94	616.988	1847.95	616.989	3	17	5.1.1.6534.3	64.9631	117.913	117.913			9850.68
2	18.26	18.26	18.21	tr|Q7DMU0	Storage protein OS=Triticum aestivum OX=4565 GN=Gbl1 PE=4 SV=1; Embryo globulin OS=Hordeum vulgare OX=4513 GN=Beg1 PE=2 SV=1	0	99	LAVVLEGEGEVQIVCPH	Carbamidomethyl(C)@15		cleaved H-L@C-term	0.00465641	1847.95	616.99	1847.95	616.989	3	22	5.1.1.6587.5	69.9849	60.5152	60.5152			8890.65
2	18.26	18.26	18.21	tr|Q7DMU0	Storage protein OS=Triticum aestivum OX=4565 GN=Gbl1 PE=4 SV=1; Embryo globulin OS=Hordeum vulgare OX=4513 GN=Beg1 PE=2 SV=1	0	99	LAVVLEGEGEVQIVCPH	Carbamidomethyl(C)@15		cleaved H-L@C-term	0.00721969	1847.95	616.991	1847.95	616.989	3	21	5.1.1.6588.5	70.0798	53.4162	53.4162			9304.91
2	18.26	18.26	18.21	tr|Q7DMU0	Storage protein OS=Triticum aestivum OX=4565 GN=Gbl1 PE=4 SV=1; Embryo globulin OS=Hordeum vulgare OX=4513 GN=Beg1 PE=2 SV=1	0	99	LAVVLEGEGEVQIVCPH	Carbamidomethyl(C)@15		cleaved H-L@C-term	0.00392404	1847.95	616.99	1847.95	616.989	3	20	5.1.1.6622.5	73.3028	40.5888	40.5888			7683.61
2	18.26	18.26	18.21	tr|Q7DMU0	Storage protein OS=Triticum aestivum OX=4565 GN=Gbl1 PE=4 SV=1; Embryo globulin OS=Hordeum vulgare OX=4513 GN=Beg1 PE=2 SV=1	0	99	LAVVLEGEGEVQIVCPH	Carbamidomethyl(C)@15		cleaved H-L@C-term	0.00758587	1847.95	616.991	1847.95	616.989	3	22	5.1.1.6623.7	73.4061	40.5797	40.5797			7629.61
2	18.26	18.26	18.21	tr|Q7DMU0	Storage protein OS=Triticum aestivum OX=4565 GN=Gbl1 PE=4 SV=1; Embryo globulin OS=Hordeum vulgare OX=4513 GN=Beg1 PE=2 SV=1	0	99	LAVVLEGEGEVQIVCPH	Carbamidomethyl(C)@15		cleaved H-L@C-term	-0.000470152	1847.94	616.989	1847.95	616.989	3	21	5.1.1.6624.6	73.4972	40.2068	40.2068			7466.1
2	18.26	18.26	18.21	tr|Q7DMU0	Storage protein OS=Triticum aestivum OX=4565 GN=Gbl1 PE=4 SV=1; Embryo globulin OS=Hordeum vulgare OX=4513 GN=Beg1 PE=2 SV=1	0	99	LAVVLEGEGEVQIVCPH	Carbamidomethyl(C)@15		cleaved H-L@C-term	0.00300858	1847.95	616.99	1847.95	616.989	3	22	5.1.1.6625.5	73.5879	45.5986	45.5986			7492.35
2	18.26	18.26	18.21	tr|Q7DMU0	Storage protein OS=Triticum aestivum OX=4565 GN=Gbl1 PE=4 SV=1; Embryo globulin OS=Hordeum vulgare OX=4513 GN=Beg1 PE=2 SV=1	0	99	LAVVLEGEGEVQIVCPH	Carbamidomethyl(C)@15		cleaved H-L@C-term	0.00557186	1847.95	616.991	1847.95	616.989	3	20	5.1.1.6626.6	73.687	43.4376	43.4376			7186.03
2	18.26	18.26	18.21	tr|Q7DMU0	Storage protein OS=Triticum aestivum OX=4565 GN=Gbl1 PE=4 SV=1; Embryo globulin OS=Hordeum vulgare OX=4513 GN=Beg1 PE=2 SV=1	0	99	LAVVLEGEGEVQIVCPH	Carbamidomethyl(C)@15		cleaved H-L@C-term	-0.0037658	1847.94	616.988	1847.95	616.989	3	20	5.1.1.6627.7	73.7861	41.1429	41.1429			7223.35
2	18.26	18.26	18.21	tr|Q7DMU0	Storage protein OS=Triticum aestivum OX=4565 GN=Gbl1 PE=4 SV=1; Embryo globulin OS=Hordeum vulgare OX=4513 GN=Beg1 PE=2 SV=1	0	99	LAVVLEGEGEVQIVCPH	Carbamidomethyl(C)@15		cleaved H-L@C-term	0.000445305	1847.95	616.989	1847.95	616.989	3	21	5.1.1.6628.6	73.8769	40.6342	40.6342			7202.85
2	18.26	18.26	18.21	tr|Q7DMU0	Storage protein OS=Triticum aestivum OX=4565 GN=Gbl1 PE=4 SV=1; Embryo globulin OS=Hordeum vulgare OX=4513 GN=Beg1 PE=2 SV=1	0	99	LAVVLEGEGEVQIVCPH	Carbamidomethyl(C)@15		cleaved H-L@C-term	-0.000836335	1847.94	616.989	1847.95	616.989	3	21	5.1.1.6629.7	73.9759	40.781	40.781			7455.6
2	18.26	18.26	18.21	tr|Q7DMU0	Storage protein OS=Triticum aestivum OX=4565 GN=Gbl1 PE=4 SV=1; Embryo globulin OS=Hordeum vulgare OX=4513 GN=Beg1 PE=2 SV=1	0	99	LAVVLEGEGEVQIVCPH	Carbamidomethyl(C)@15		cleaved H-L@C-term	0.00465641	1847.95	616.99	1847.95	616.989	3	24	5.1.1.6630.7	74.071	37.686	37.686			7457.29
2	18.26	18.26	18.21	tr|Q7DMU0	Storage protein OS=Triticum aestivum OX=4565 GN=Gbl1 PE=4 SV=1; Embryo globulin OS=Hordeum vulgare OX=4513 GN=Beg1 PE=2 SV=1	0	99	LAVVLEGEGEVQIVCPH	Carbamidomethyl(C)@15		cleaved H-L@C-term	0.00227622	1847.95	616.99	1847.95	616.989	3	21	5.1.1.6631.7	74.166	42.4034	42.4034			7549.85
2	18.26	18.26	18.21	tr|Q7DMU0	Storage protein OS=Triticum aestivum OX=4565 GN=Gbl1 PE=4 SV=1; Embryo globulin OS=Hordeum vulgare OX=4513 GN=Beg1 PE=2 SV=1	0	99	LAVVLEGEGEVQIVCPH	Carbamidomethyl(C)@15		cleaved H-L@C-term	0.00300858	1847.95	616.99	1847.95	616.989	3	21	5.1.1.6632.7	74.2608	40.8737	40.8737			7345.35
2	18.26	18.26	18.21	tr|Q7DMU0	Storage protein OS=Triticum aestivum OX=4565 GN=Gbl1 PE=4 SV=1; Embryo globulin OS=Hordeum vulgare OX=4513 GN=Beg1 PE=2 SV=1	0	99	LAVVLEGEGEVQIVCPH	Carbamidomethyl(C)@15		cleaved H-L@C-term	0.00245931	1847.95	616.99	1847.95	616.989	3	21	5.1.1.6633.8	74.3599	38.5621	38.5621			7298.35
2	18.26	18.26	18.21	tr|Q7DMU0	Storage protein OS=Triticum aestivum OX=4565 GN=Gbl1 PE=4 SV=1; Embryo globulin OS=Hordeum vulgare OX=4513 GN=Beg1 PE=2 SV=1	0	99	LAVVLEGEGEVQIVCPH	Carbamidomethyl(C)@15		cleaved H-L@C-term	-0.00431507	1847.94	616.987	1847.95	616.989	3	21	5.1.1.6634.6	74.4465	39.2287	39.2287			7718.11
2	18.26	18.26	18.21	tr|Q7DMU0	Storage protein OS=Triticum aestivum OX=4565 GN=Gbl1 PE=4 SV=1; Embryo globulin OS=Hordeum vulgare OX=4513 GN=Beg1 PE=2 SV=1	0	99	LAVVLEGEGEVQIVCPH	Carbamidomethyl(C)@15		cleaved H-L@C-term	-0.00193488	1847.94	616.988	1847.95	616.989	3	21	5.1.1.6635.8	74.5498	37.5618	37.5618			7871.87
2	18.26	18.26	18.21	tr|Q7DMU0	Storage protein OS=Triticum aestivum OX=4565 GN=Gbl1 PE=4 SV=1; Embryo globulin OS=Hordeum vulgare OX=4513 GN=Beg1 PE=2 SV=1	0	99	LAVVLEGEGEVQIVCPH	Carbamidomethyl(C)@15		cleaved H-L@C-term	-0.0037658	1847.94	616.988	1847.95	616.989	3	20	5.1.1.6636.7	74.6406	37.8195	37.8195			7435.1
2	18.26	18.26	18.21	tr|Q7DMU0	Storage protein OS=Triticum aestivum OX=4565 GN=Gbl1 PE=4 SV=1; Embryo globulin OS=Hordeum vulgare OX=4513 GN=Beg1 PE=2 SV=1	0	99	LAVVLEGEGEVQIVCPH	Carbamidomethyl(C)@15		cleaved H-L@C-term	0.00282549	1847.95	616.99	1847.95	616.989	3	21	5.1.1.6638.6	74.8262	39.7762	39.7762			7283.35
2	18.26	18.26	18.21	tr|Q7DMU0	Storage protein OS=Triticum aestivum OX=4565 GN=Gbl1 PE=4 SV=1; Embryo globulin OS=Hordeum vulgare OX=4513 GN=Beg1 PE=2 SV=1	0	99	LAVVLEGEGEVQIVCPH	Carbamidomethyl(C)@15		cleaved H-L@C-term	-0.00559671	1847.94	616.987	1847.95	616.989	3	20	5.1.1.6639.6	74.921	38.8464	38.8464			7123.84
2	18.26	18.26	18.21	tr|Q7DMU0	Storage protein OS=Triticum aestivum OX=4565 GN=Gbl1 PE=4 SV=1; Embryo globulin OS=Hordeum vulgare OX=4513 GN=Beg1 PE=2 SV=1	0	99	LAVVLEGEGEVQIVCPH	Carbamidomethyl(C)@15		cleaved H-L@C-term	-0.00504744	1847.94	616.987	1847.95	616.989	3	21	5.1.1.6640.7	75.0201	37.8021	37.8021			7227.35
2	18.26	18.26	18.21	tr|Q7DMU0	Storage protein OS=Triticum aestivum OX=4565 GN=Gbl1 PE=4 SV=1; Embryo globulin OS=Hordeum vulgare OX=4513 GN=Beg1 PE=2 SV=1	0	99	LAVVLEGEGEVQIVCPH	Carbamidomethyl(C)@15		cleaved H-L@C-term	7.91218e-05	1847.95	616.989	1847.95	616.989	3	21	5.1.1.6641.6	75.111	37.6773	37.6773			7251.6
2	18.26	18.26	18.21	tr|Q7DMU0	Storage protein OS=Triticum aestivum OX=4565 GN=Gbl1 PE=4 SV=1; Embryo globulin OS=Hordeum vulgare OX=4513 GN=Beg1 PE=2 SV=1	0	99	LAVVLEGEGEVQIVCPH	Carbamidomethyl(C)@15		cleaved H-L@C-term	-0.000470152	1847.94	616.989	1847.95	616.989	3	20	5.1.1.6642.7	75.2099	40.6342	40.6342			7000.34
2	18.26	18.26	18.21	tr|Q7DMU0	Storage protein OS=Triticum aestivum OX=4565 GN=Gbl1 PE=4 SV=1; Embryo globulin OS=Hordeum vulgare OX=4513 GN=Beg1 PE=2 SV=1	0	99	LAVVLEGEGEVQIVCPH	Carbamidomethyl(C)@15		cleaved H-L@C-term	-0.000836335	1847.94	616.989	1847.95	616.989	3	19	5.1.1.6643.6	75.3008	38.5797	38.5797			7037.34
2	18.26	18.26	18.21	tr|Q7DMU0	Storage protein OS=Triticum aestivum OX=4565 GN=Gbl1 PE=4 SV=1; Embryo globulin OS=Hordeum vulgare OX=4513 GN=Beg1 PE=2 SV=1	0	99	LAVVLEGEGEVQIVCPH	Carbamidomethyl(C)@15		cleaved H-L@C-term	0.000628396	1847.95	616.989	1847.95	616.989	3	22	5.1.1.6644.5	75.3916	42.1839	42.1839			7154.72
2	18.26	18.26	18.21	tr|Q7DMU0	Storage protein OS=Triticum aestivum OX=4565 GN=Gbl1 PE=4 SV=1; Embryo globulin OS=Hordeum vulgare OX=4513 GN=Beg1 PE=2 SV=1	0	99	LAVVLEGEGEVQIVCPH	Carbamidomethyl(C)@15		cleaved H-L@C-term	-0.00285034	1847.94	616.988	1847.95	616.989	3	21	5.1.1.6645.6	75.4904	42.9713	42.9713			6879.34
2	18.26	18.26	18.21	tr|Q7DMU0	Storage protein OS=Triticum aestivum OX=4565 GN=Gbl1 PE=4 SV=1; Embryo globulin OS=Hordeum vulgare OX=4513 GN=Beg1 PE=2 SV=1	0	99	LAVVLEGEGEVQIVCPH	Carbamidomethyl(C)@15		cleaved H-L@C-term	-0.00651217	1847.94	616.987	1847.95	616.989	3	19	5.1.1.6646.7	75.5894	40.5979	40.5979			7027.34
2	18.26	18.26	18.21	tr|Q7DMU0	Storage protein OS=Triticum aestivum OX=4565 GN=Gbl1 PE=4 SV=1; Embryo globulin OS=Hordeum vulgare OX=4513 GN=Beg1 PE=2 SV=1	0	99	LAVVLEGEGEVQIVCPH	Carbamidomethyl(C)@15		cleaved H-L@C-term	-0.00154736	1847.94	924.979	1847.95	924.98	2	20	5.1.1.6647.20	75.7383	1711.7	1625.53	75	2.85	6178.56
2	18.26	18.26	18.21	tr|Q7DMU0	Storage protein OS=Triticum aestivum OX=4565 GN=Gbl1 PE=4 SV=1; Embryo globulin OS=Hordeum vulgare OX=4513 GN=Beg1 PE=2 SV=1	0	99	LAVVLEGEGEVQIVCPH	Carbamidomethyl(C)@15		cleaved H-L@C-term	0.000445305	1847.95	616.989	1847.95	616.989	3	20	5.1.1.6648.7	75.7792	36.1284	36.1284			7037.09
2	18.26	18.26	18.21	tr|Q7DMU0	Storage protein OS=Triticum aestivum OX=4565 GN=Gbl1 PE=4 SV=1; Embryo globulin OS=Hordeum vulgare OX=4513 GN=Beg1 PE=2 SV=1	0	99	LAVVLEGEGEVQIVCPH	Carbamidomethyl(C)@15		cleaved H-L@C-term	0.00245931	1847.95	616.99	1847.95	616.989	3	21	5.1.1.6649.7	75.874	36.0863	36.0863			7361.33
2	18.26	18.26	18.21	tr|Q7DMU0	Storage protein OS=Triticum aestivum OX=4565 GN=Gbl1 PE=4 SV=1; Embryo globulin OS=Hordeum vulgare OX=4513 GN=Beg1 PE=2 SV=1	0	99	LAVVLEGEGEVQIVCPH	Carbamidomethyl(C)@15		cleaved H-L@C-term	-0.00431507	1847.94	616.987	1847.95	616.989	3	21	5.1.1.6651.6	76.0598	36.8104	36.8104			6843.34
2	18.26	18.26	18.21	tr|Q7DMU0	Storage protein OS=Triticum aestivum OX=4565 GN=Gbl1 PE=4 SV=1; Embryo globulin OS=Hordeum vulgare OX=4513 GN=Beg1 PE=2 SV=1	0	99	LAVVLEGEGEVQIVCPH	Carbamidomethyl(C)@15		cleaved H-L@C-term	0.0982218	1848.04	617.022	1847.95	616.989	3	25	7.1.1.5393.7	57.876	20413.7	14548	58.51	2.28	30326.5
2	18.26	18.26	18.21	tr|Q7DMU0	Storage protein OS=Triticum aestivum OX=4565 GN=Gbl1 PE=4 SV=1; Embryo globulin OS=Hordeum vulgare OX=4513 GN=Beg1 PE=2 SV=1	0	99	LAVVLEGEGEVQIVCPH	Carbamidomethyl(C)@15		cleaved H-L@C-term	0.0982218	1848.04	617.022	1847.95	616.989	3	23	7.1.1.5394.6	57.9667	20413.7	14518.9	58.51	2.28	31085.6
2	18.26	18.26	18.21	tr|Q7DMU0	Storage protein OS=Triticum aestivum OX=4565 GN=Gbl1 PE=4 SV=1; Embryo globulin OS=Hordeum vulgare OX=4513 GN=Beg1 PE=2 SV=1	0	99	LAVVLEGEGEVQIVCPH	Carbamidomethyl(C)@15		cleaved H-L@C-term	0.0982218	1848.04	617.022	1847.95	616.989	3	22	7.1.1.5395.7	58.0658	20413.7	15353.9	58.51	2.28	30332.8
2	18.26	18.26	18.21	tr|Q7DMU0	Storage protein OS=Triticum aestivum OX=4565 GN=Gbl1 PE=4 SV=1; Embryo globulin OS=Hordeum vulgare OX=4513 GN=Beg1 PE=2 SV=1	0	99	LAVVLEGEGEVQIVCPH	Carbamidomethyl(C)@15		cleaved H-L@C-term	0.0982218	1848.04	617.022	1847.95	616.989	3	22	7.1.1.5396.7	58.1607	20413.7	16302	58.51	2.28	31584.8
2	18.26	18.26	18.21	tr|Q7DMU0	Storage protein OS=Triticum aestivum OX=4565 GN=Gbl1 PE=4 SV=1; Embryo globulin OS=Hordeum vulgare OX=4513 GN=Beg1 PE=2 SV=1	0	99	LAVVLEGEGEVQIVCPH	Carbamidomethyl(C)@15		cleaved H-L@C-term	0.0982218	1848.04	617.022	1847.95	616.989	3	23	7.1.1.5397.7	58.2557	20413.7	17667.2	58.51	2.28	32425.9
2	18.26	18.26	18.21	tr|Q7DMU0	Storage protein OS=Triticum aestivum OX=4565 GN=Gbl1 PE=4 SV=1; Embryo globulin OS=Hordeum vulgare OX=4513 GN=Beg1 PE=2 SV=1	0	99	LAVVLEGEGEVQIVCPH	Carbamidomethyl(C)@15		cleaved H-L@C-term	0.0982218	1848.04	617.022	1847.95	616.989	3	23	7.1.1.5398.7	58.3504	20413.7	19108.3	58.51	2.28	34850.4
2	18.26	18.26	18.21	tr|Q7DMU0	Storage protein OS=Triticum aestivum OX=4565 GN=Gbl1 PE=4 SV=1; Embryo globulin OS=Hordeum vulgare OX=4513 GN=Beg1 PE=2 SV=1	0	99	LAVVLEGEGEVQIVCPH	Carbamidomethyl(C)@15		cleaved H-L@C-term	0.0982218	1848.04	617.022	1847.95	616.989	3	25	7.1.1.5399.6	58.4411	20413.7	19788.2	58.51	2.28	36780.2
2	18.26	18.26	18.21	tr|Q7DMU0	Storage protein OS=Triticum aestivum OX=4565 GN=Gbl1 PE=4 SV=1; Embryo globulin OS=Hordeum vulgare OX=4513 GN=Beg1 PE=2 SV=1	0	99	LAVVLEGEGEVQIVCPH	Carbamidomethyl@N-term; Carbamidomethyl(C)@15		cleaved H-L@C-term	0.105139	1905.07	636.031	1904.97	635.996	3	19	7.1.1.5401.5	58.6265	4708.92	4636.36	58.7	2.09	14084.1
2	18.26	18.26	18.21	tr|Q7DMU0	Storage protein OS=Triticum aestivum OX=4565 GN=Gbl1 PE=4 SV=1; Embryo globulin OS=Hordeum vulgare OX=4513 GN=Beg1 PE=2 SV=1	0	99	LAVVLEGEGEVQIVCPH	Carbamidomethyl(C)@15		cleaved H-L@C-term	0.0982218	1848.04	617.022	1847.95	616.989	3	23	7.1.1.5402.6	58.7255	20413.7	18372.7	58.51	2.28	36235
2	18.26	18.26	18.21	tr|Q7DMU0	Storage protein OS=Triticum aestivum OX=4565 GN=Gbl1 PE=4 SV=1; Embryo globulin OS=Hordeum vulgare OX=4513 GN=Beg1 PE=2 SV=1	0	99	LAVVLEGEGEVQIVCPH	Carbamidomethyl(C)@15		cleaved H-L@C-term	0.0982218	1848.04	617.022	1847.95	616.989	3	22	7.1.1.5403.4	58.812	20413.7	18163.8	58.51	2.28	36278
2	18.26	18.26	18.21	tr|Q7DMU0	Storage protein OS=Triticum aestivum OX=4565 GN=Gbl1 PE=4 SV=1; Embryo globulin OS=Hordeum vulgare OX=4513 GN=Beg1 PE=2 SV=1	0	99	LAVVLEGEGEVQIVCPH	Carbamidomethyl(C)@15		cleaved H-L@C-term	0.0982218	1848.04	617.022	1847.95	616.989	3	23	7.1.1.5404.5	58.9108	20413.7	17365.1	58.51	2.28	35759.2
2	18.26	18.26	18.21	tr|Q7DMU0	Storage protein OS=Triticum aestivum OX=4565 GN=Gbl1 PE=4 SV=1; Embryo globulin OS=Hordeum vulgare OX=4513 GN=Beg1 PE=2 SV=1	0	99	LAVVLEGEGEVQIVCPH	Carbamidomethyl(C)@15		cleaved H-L@C-term	0.0982218	1848.04	617.022	1847.95	616.989	3	24	7.1.1.5407.3	59.1868	20413.7	14198.5	58.51	2.28	27189.7
2	18.26	18.26	18.21	tr|Q7DMU0	Storage protein OS=Triticum aestivum OX=4565 GN=Gbl1 PE=4 SV=1; Embryo globulin OS=Hordeum vulgare OX=4513 GN=Beg1 PE=2 SV=1	0	99	LAVVLEGEGEVQIVCPH	Carbamidomethyl(C)@15		cleaved H-L@C-term	0.0982218	1848.04	617.022	1847.95	616.989	3	22	7.1.1.5408.3	59.2816	20413.7	13885.9	58.51	2.28	27396.2
2	18.26	18.26	18.21	tr|Q7DMU0	Storage protein OS=Triticum aestivum OX=4565 GN=Gbl1 PE=4 SV=1; Embryo globulin OS=Hordeum vulgare OX=4513 GN=Beg1 PE=2 SV=1	0	99	LAVVLEGEGEVQIVCPH	Carbamidomethyl(C)@15		cleaved H-L@C-term	0.0982218	1848.04	617.022	1847.95	616.989	3	22	7.1.1.5409.4	59.3807	20413.7	13868.7	58.51	2.28	29020
2	18.26	18.26	18.21	tr|Q7DMU0	Storage protein OS=Triticum aestivum OX=4565 GN=Gbl1 PE=4 SV=1; Embryo globulin OS=Hordeum vulgare OX=4513 GN=Beg1 PE=2 SV=1	0	99	LAVVLEGEGEVQIVCPH	Carbamidomethyl(C)@15		cleaved H-L@C-term	0.0982218	1848.04	617.022	1847.95	616.989	3	23	7.1.1.5410.4	59.4756	20413.7	13280.9	58.51	2.28	29867.5
2	18.26	18.26	18.21	tr|Q7DMU0	Storage protein OS=Triticum aestivum OX=4565 GN=Gbl1 PE=4 SV=1; Embryo globulin OS=Hordeum vulgare OX=4513 GN=Beg1 PE=2 SV=1	0	99	LAVVLEGEGEVQIVCPH	Carbamidomethyl(C)@15		cleaved H-L@C-term	0.0982218	1848.04	617.022	1847.95	616.989	3	23	7.1.1.5411.4	59.5705	20413.7	12668.7	58.51	2.28	28793.3
2	18.26	18.26	18.21	tr|Q7DMU0	Storage protein OS=Triticum aestivum OX=4565 GN=Gbl1 PE=4 SV=1; Embryo globulin OS=Hordeum vulgare OX=4513 GN=Beg1 PE=2 SV=1	0	99	LAVVLEGEGEVQIVCPH	Carbamidomethyl(C)@15		cleaved H-L@C-term	0.0982218	1848.04	617.022	1847.95	616.989	3	21	7.1.1.5412.4	59.6651	20413.7	12231.2	58.51	2.28	27052.8
2	18.26	18.26	18.21	tr|Q7DMU0	Storage protein OS=Triticum aestivum OX=4565 GN=Gbl1 PE=4 SV=1; Embryo globulin OS=Hordeum vulgare OX=4513 GN=Beg1 PE=2 SV=1	0	99	LAVVLEGEGEVQIVCPH	Carbamidomethyl(C)@15		cleaved H-L@C-term	0.0982218	1848.04	617.022	1847.95	616.989	3	24	7.1.1.5413.4	59.7598	20413.7	11796	58.51	2.28	25697.7
2	18.26	18.26	18.21	tr|Q7DMU0	Storage protein OS=Triticum aestivum OX=4565 GN=Gbl1 PE=4 SV=1; Embryo globulin OS=Hordeum vulgare OX=4513 GN=Beg1 PE=2 SV=1	0	99	LAVVLEGEGEVQIVCPH	Carbamidomethyl(C)@15		cleaved H-L@C-term	0.0982218	1848.04	617.022	1847.95	616.989	3	21	7.1.1.5414.4	59.8544	20413.7	11185.8	58.51	2.28	25616.9
2	18.26	18.26	18.21	tr|Q7DMU0	Storage protein OS=Triticum aestivum OX=4565 GN=Gbl1 PE=4 SV=1; Embryo globulin OS=Hordeum vulgare OX=4513 GN=Beg1 PE=2 SV=1	0	99	LAVVLEGEGEVQIVCPH	Carbamidomethyl(C)@15		cleaved H-L@C-term	0.0982218	1848.04	617.022	1847.95	616.989	3	22	7.1.1.5415.5	59.9537	20413.7	11260.7	58.51	2.28	24741.1
2	18.26	18.26	18.21	tr|Q7DMU0	Storage protein OS=Triticum aestivum OX=4565 GN=Gbl1 PE=4 SV=1; Embryo globulin OS=Hordeum vulgare OX=4513 GN=Beg1 PE=2 SV=1	0	99	LAVVLEGEGEVQIVCPH	Carbamidomethyl(C)@15		cleaved H-L@C-term	0.100602	1848.05	617.023	1847.95	616.989	3	20	7.1.1.5416.5	60.0485	13506.4	11891.4	60.4	1.14	24650.9
2	18.26	18.26	18.21	tr|Q7DMU0	Storage protein OS=Triticum aestivum OX=4565 GN=Gbl1 PE=4 SV=1; Embryo globulin OS=Hordeum vulgare OX=4513 GN=Beg1 PE=2 SV=1	0	99	LAVVLEGEGEVQIVCPH	Carbamidomethyl(C)@15		cleaved H-L@C-term	0.100602	1848.05	617.023	1847.95	616.989	3	22	7.1.1.5417.5	60.1433	13506.4	12125.7	60.4	1.14	25802.4
2	18.26	18.26	18.21	tr|Q7DMU0	Storage protein OS=Triticum aestivum OX=4565 GN=Gbl1 PE=4 SV=1; Embryo globulin OS=Hordeum vulgare OX=4513 GN=Beg1 PE=2 SV=1	0	99	LAVVLEGEGEVQIVCPH	Carbamidomethyl(C)@15		cleaved H-L@C-term	0.100602	1848.05	617.023	1847.95	616.989	3	22	7.1.1.5418.4	60.2343	13506.4	12421	60.4	1.14	27647
2	18.26	18.26	18.21	tr|Q7DMU0	Storage protein OS=Triticum aestivum OX=4565 GN=Gbl1 PE=4 SV=1; Embryo globulin OS=Hordeum vulgare OX=4513 GN=Beg1 PE=2 SV=1	0	99	LAVVLEGEGEVQIVCPH	Carbamidomethyl(C)@15		cleaved H-L@C-term	0.100602	1848.05	617.023	1847.95	616.989	3	22	7.1.1.5419.3	60.3248	13506.4	13274	60.4	1.14	27566.2
2	18.26	18.26	18.21	tr|Q7DMU0	Storage protein OS=Triticum aestivum OX=4565 GN=Gbl1 PE=4 SV=1; Embryo globulin OS=Hordeum vulgare OX=4513 GN=Beg1 PE=2 SV=1	0	99	LAVVLEGEGEVQIVCPH	Carbamidomethyl(C)@15		cleaved H-L@C-term	0.100602	1848.05	617.023	1847.95	616.989	3	23	7.1.1.5420.4	60.4235	13506.4	13465.8	60.4	1.14	28185.5
2	18.26	18.26	18.21	tr|Q7DMU0	Storage protein OS=Triticum aestivum OX=4565 GN=Gbl1 PE=4 SV=1; Embryo globulin OS=Hordeum vulgare OX=4513 GN=Beg1 PE=2 SV=1	0	99	LAVVLEGEGEVQIVCPH	Carbamidomethyl(C)@15		cleaved H-L@C-term	0.100602	1848.05	617.023	1847.95	616.989	3	19	7.1.1.5423.5	60.711	13506.4	9504.4	60.4	1.14	19570.2
2	18.26	18.26	18.21	tr|Q7DMU0	Storage protein OS=Triticum aestivum OX=4565 GN=Gbl1 PE=4 SV=1; Embryo globulin OS=Hordeum vulgare OX=4513 GN=Beg1 PE=2 SV=1	0	99	LAVVLEGEGEVQIVCPH	Carbamidomethyl(C)@15		cleaved H-L@C-term	0.100602	1848.05	617.023	1847.95	616.989	3	22	7.1.1.5424.5	60.8053	13506.4	8404.51	60.4	1.14	17816.4
2	18.26	18.26	18.21	tr|Q7DMU0	Storage protein OS=Triticum aestivum OX=4565 GN=Gbl1 PE=4 SV=1; Embryo globulin OS=Hordeum vulgare OX=4513 GN=Beg1 PE=2 SV=1	0	99	LAVVLEGEGEVQIVCPH	Carbamidomethyl(C)@15		cleaved H-L@C-term	0.100602	1848.05	617.023	1847.95	616.989	3	21	7.1.1.5425.5	60.8998	13506.4	7860.2	60.4	1.14	16669.6
2	18.26	18.26	18.21	tr|Q7DMU0	Storage protein OS=Triticum aestivum OX=4565 GN=Gbl1 PE=4 SV=1; Embryo globulin OS=Hordeum vulgare OX=4513 GN=Beg1 PE=2 SV=1	0	99	LAVVLEGEGEVQIVCPH	Carbamidomethyl(C)@15		cleaved H-L@C-term	0.120513	1848.07	925.04	1847.95	924.98	2	21	7.1.1.5426.16	61.0403	12194.5	5528.37	60.31	0.95	20830.5
2	18.26	18.26	18.21	tr|Q7DMU0	Storage protein OS=Triticum aestivum OX=4565 GN=Gbl1 PE=4 SV=1; Embryo globulin OS=Hordeum vulgare OX=4513 GN=Beg1 PE=2 SV=1	0	99	LAVVLEGEGEVQIVCPH	Carbamidomethyl(C)@15		cleaved H-L@C-term	0.100602	1848.05	617.023	1847.95	616.989	3	22	7.1.1.5427.6	61.0931	13506.4	7196.2	60.4	1.14	15715.6
2	18.26	18.26	18.21	tr|Q7DMU0	Storage protein OS=Triticum aestivum OX=4565 GN=Gbl1 PE=4 SV=1; Embryo globulin OS=Hordeum vulgare OX=4513 GN=Beg1 PE=2 SV=1	0	99	LAVVLEGEGEVQIVCPH	Carbamidomethyl(C)@15		cleaved H-L@C-term	0.100602	1848.05	617.023	1847.95	616.989	3	20	7.1.1.5428.8	61.196	13506.4	6879.12	60.4	1.14	15560.9
2	18.26	18.26	18.21	tr|Q7DMU0	Storage protein OS=Triticum aestivum OX=4565 GN=Gbl1 PE=4 SV=1; Embryo globulin OS=Hordeum vulgare OX=4513 GN=Beg1 PE=2 SV=1	0	99	LAVVLEGEGEVQIVCPH	Carbamidomethyl(C)@15		cleaved H-L@C-term	0.100602	1848.05	617.023	1847.95	616.989	3	22	7.1.1.5429.8	61.2904	13506.4	6560.33	60.4	1.14	15164.8
2	18.26	18.26	18.21	tr|Q7DMU0	Storage protein OS=Triticum aestivum OX=4565 GN=Gbl1 PE=4 SV=1; Embryo globulin OS=Hordeum vulgare OX=4513 GN=Beg1 PE=2 SV=1	0	99	LAVVLEGEGEVQIVCPH	Carbamidomethyl(C)@15		cleaved H-L@C-term	0.100602	1848.05	617.023	1847.95	616.989	3	20	7.1.1.5430.7	61.3809	13506.4	6639.21	60.4	1.14	14906.1
2	18.26	18.26	18.21	tr|Q7DMU0	Storage protein OS=Triticum aestivum OX=4565 GN=Gbl1 PE=4 SV=1; Embryo globulin OS=Hordeum vulgare OX=4513 GN=Beg1 PE=2 SV=1	0	99	LAVVLEGEGEVQIVCPH	Carbamidomethyl(C)@15		cleaved H-L@C-term	0.0987711	1848.04	617.022	1847.95	616.989	3	20	7.1.1.5431.7	61.4757	7461.82	7123.36	61.63	1.23	15599.4
2	18.26	18.26	18.21	tr|Q7DMU0	Storage protein OS=Triticum aestivum OX=4565 GN=Gbl1 PE=4 SV=1; Embryo globulin OS=Hordeum vulgare OX=4513 GN=Beg1 PE=2 SV=1	0	99	LAVVLEGEGEVQIVCPH	Carbamidomethyl(C)@15		cleaved H-L@C-term	0.0987711	1848.04	617.022	1847.95	616.989	3	21	7.1.1.5432.4	61.5581	7461.82	7399.73	61.63	1.23	17856.7
2	18.26	18.26	18.21	tr|Q7DMU0	Storage protein OS=Triticum aestivum OX=4565 GN=Gbl1 PE=4 SV=1; Embryo globulin OS=Hordeum vulgare OX=4513 GN=Beg1 PE=2 SV=1	0	99	LAVVLEGEGEVQIVCPH	Carbamidomethyl(C)@15		cleaved H-L@C-term	0.0987711	1848.04	617.022	1847.95	616.989	3	19	7.1.1.5435.3	61.8382	7461.82	5220.66	61.63	1.23	18080.7
2	18.26	18.26	18.21	tr|Q7DMU0	Storage protein OS=Triticum aestivum OX=4565 GN=Gbl1 PE=4 SV=1; Embryo globulin OS=Hordeum vulgare OX=4513 GN=Beg1 PE=2 SV=1	0	99	LAVVLEGEGEVQIVCPH	Carbamidomethyl(C)@15		cleaved H-L@C-term	0.0987711	1848.04	617.022	1847.95	616.989	3	20	7.1.1.5436.3	61.9325	7461.82	4868.73	61.63	1.23	16251.9
2	18.26	18.26	18.21	tr|Q7DMU0	Storage protein OS=Triticum aestivum OX=4565 GN=Gbl1 PE=4 SV=1; Embryo globulin OS=Hordeum vulgare OX=4513 GN=Beg1 PE=2 SV=1	0	99	LAVVLEGEGEVQIVCPH	Carbamidomethyl(C)@15		cleaved H-L@C-term	0.00409494	1847.95	616.99	1847.95	616.989	3	20	7.1.1.5438.4	62.1262	7461.82	4942.33	61.63	1.23	15323.6
2	18.26	18.26	18.21	tr|Q7DMU0	Storage protein OS=Triticum aestivum OX=4565 GN=Gbl1 PE=4 SV=1; Embryo globulin OS=Hordeum vulgare OX=4513 GN=Beg1 PE=2 SV=1	0	99	LAVVLEGEGEVQIVCPH	Carbamidomethyl(C)@15		cleaved H-L@C-term	0.00409494	1847.95	616.99	1847.95	616.989	3	21	7.1.1.5440.4	62.315	7461.82	4239.79	61.63	1.23	13653.8
2	18.26	18.26	18.21	tr|Q7DMU0	Storage protein OS=Triticum aestivum OX=4565 GN=Gbl1 PE=4 SV=1; Embryo globulin OS=Hordeum vulgare OX=4513 GN=Beg1 PE=2 SV=1	0	99	LAVVLEGEGEVQIVCPH	Carbamidomethyl(C)@15		cleaved H-L@C-term	0.00409494	1847.95	616.99	1847.95	616.989	3	22	7.1.1.5441.3	62.4051	7461.82	3900.12	61.63	1.23	13223.5
2	18.26	18.26	18.21	tr|Q7DMU0	Storage protein OS=Triticum aestivum OX=4565 GN=Gbl1 PE=4 SV=1; Embryo globulin OS=Hordeum vulgare OX=4513 GN=Beg1 PE=2 SV=1	0	99	LAVVLEGEGEVQIVCPH	Carbamidomethyl(C)@15		cleaved H-L@C-term	0.00409494	1847.95	616.99	1847.95	616.989	3	22	7.1.1.5442.3	62.4995	7461.82	3543.07	61.63	1.23	13027.5
2	18.26	18.26	18.21	tr|Q7DMU0	Storage protein OS=Triticum aestivum OX=4565 GN=Gbl1 PE=4 SV=1; Embryo globulin OS=Hordeum vulgare OX=4513 GN=Beg1 PE=2 SV=1	0	99	LAVVLEGEGEVQIVCPH	Carbamidomethyl(C)@15		cleaved H-L@C-term	0.00171478	1847.95	616.99	1847.95	616.989	3	21	7.1.1.5454.6	63.6461	5954.95	3810.18	64.47	1.32	11023.7
2	18.26	18.26	18.21	tr|Q7DMU0	Storage protein OS=Triticum aestivum OX=4565 GN=Gbl1 PE=4 SV=1; Embryo globulin OS=Hordeum vulgare OX=4513 GN=Beg1 PE=2 SV=1	0	99	LAVVLEGEGEVQIVCPH	Carbamidomethyl(C)@15		cleaved H-L@C-term	0.00171478	1847.95	616.99	1847.95	616.989	3	22	7.1.1.5455.4	63.7318	5954.95	4072.56	64.47	1.32	11906.5
2	18.26	18.26	18.21	tr|Q7DMU0	Storage protein OS=Triticum aestivum OX=4565 GN=Gbl1 PE=4 SV=1; Embryo globulin OS=Hordeum vulgare OX=4513 GN=Beg1 PE=2 SV=1	0	99	LAVVLEGEGEVQIVCPH	Carbamidomethyl(C)@15		cleaved H-L@C-term	0.00171478	1847.95	616.99	1847.95	616.989	3	21	7.1.1.5457.4	63.92	5954.95	4583.1	64.47	1.32	12077
2	18.26	18.26	18.21	tr|Q7DMU0	Storage protein OS=Triticum aestivum OX=4565 GN=Gbl1 PE=4 SV=1; Embryo globulin OS=Hordeum vulgare OX=4513 GN=Beg1 PE=2 SV=1	0	99	LAVVLEGEGEVQIVCPH	Carbamidomethyl(C)@15		cleaved H-L@C-term	0.00171478	1847.95	616.99	1847.95	616.989	3	22	7.1.1.5458.3	64.0105	5954.95	4813.54	64.47	1.32	12084.2
2	18.26	18.26	18.21	tr|Q7DMU0	Storage protein OS=Triticum aestivum OX=4565 GN=Gbl1 PE=4 SV=1; Embryo globulin OS=Hordeum vulgare OX=4513 GN=Beg1 PE=2 SV=1	0	99	LAVVLEGEGEVQIVCPH	Carbamidomethyl(C)@15		cleaved H-L@C-term	0.00171478	1847.95	616.99	1847.95	616.989	3	22	7.1.1.5459.3	64.1039	5954.95	5105.62	64.47	1.32	11760.2
2	18.26	18.26	18.21	tr|Q7DMU0	Storage protein OS=Triticum aestivum OX=4565 GN=Gbl1 PE=4 SV=1; Embryo globulin OS=Hordeum vulgare OX=4513 GN=Beg1 PE=2 SV=1	0	99	LAVVLEGEGEVQIVCPH	Carbamidomethyl(C)@15		cleaved H-L@C-term	0.00171478	1847.95	616.99	1847.95	616.989	3	22	7.1.1.5460.3	64.1976	5954.95	4846.93	64.47	1.32	11441.5
2	18.26	18.26	18.21	tr|Q7DMU0	Storage protein OS=Triticum aestivum OX=4565 GN=Gbl1 PE=4 SV=1; Embryo globulin OS=Hordeum vulgare OX=4513 GN=Beg1 PE=2 SV=1	0	99	LAVVLEGEGEVQIVCPH	Carbamidomethyl(C)@15		cleaved H-L@C-term	0.00171478	1847.95	616.99	1847.95	616.989	3	22	7.1.1.5461.3	64.2914	5954.95	5059.93	64.47	1.32	11488.3
2	18.26	18.26	18.21	tr|Q7DMU0	Storage protein OS=Triticum aestivum OX=4565 GN=Gbl1 PE=4 SV=1; Embryo globulin OS=Hordeum vulgare OX=4513 GN=Beg1 PE=2 SV=1	0	99	LAVVLEGEGEVQIVCPH	Carbamidomethyl(C)@15		cleaved H-L@C-term	0.00171478	1847.95	616.99	1847.95	616.989	3	22	7.1.1.5462.3	64.3856	5954.95	5391.64	64.47	1.32	12579.3
2	18.26	18.26	18.21	tr|Q7DMU0	Storage protein OS=Triticum aestivum OX=4565 GN=Gbl1 PE=4 SV=1; Embryo globulin OS=Hordeum vulgare OX=4513 GN=Beg1 PE=2 SV=1	0	99	LAVVLEGEGEVQIVCPH	Carbamidomethyl(C)@15		cleaved H-L@C-term	0.00171478	1847.95	616.99	1847.95	616.989	3	23	7.1.1.5463.5	64.4886	5954.95	5864.13	64.47	1.32	13172.3
2	18.26	18.26	18.21	tr|Q7DMU0	Storage protein OS=Triticum aestivum OX=4565 GN=Gbl1 PE=4 SV=1; Embryo globulin OS=Hordeum vulgare OX=4513 GN=Beg1 PE=2 SV=1	0	99	LAVVLEGEGEVQIVCPH	Carbamidomethyl(C)@15		cleaved H-L@C-term	0.00171478	1847.95	616.99	1847.95	616.989	3	21	7.1.1.5464.4	64.5792	5954.95	5395.99	64.47	1.32	12697
2	18.26	18.26	18.21	tr|Q7DMU0	Storage protein OS=Triticum aestivum OX=4565 GN=Gbl1 PE=4 SV=1; Embryo globulin OS=Hordeum vulgare OX=4513 GN=Beg1 PE=2 SV=1	0	99	LAVVLEGEGEVQIVCPH	Carbamidomethyl(C)@15		cleaved H-L@C-term	0.00171478	1847.95	616.99	1847.95	616.989	3	22	7.1.1.5465.4	64.6736	5954.95	4539.17	64.47	1.32	11620.2
2	18.26	18.26	18.21	tr|Q7DMU0	Storage protein OS=Triticum aestivum OX=4565 GN=Gbl1 PE=4 SV=1; Embryo globulin OS=Hordeum vulgare OX=4513 GN=Beg1 PE=2 SV=1	0	99	LAVVLEGEGEVQIVCPH	Carbamidomethyl(C)@15		cleaved H-L@C-term	-0.00616895	1847.94	924.977	1847.95	924.98	2	20	7.1.1.5466.20	64.835	3454.24	2847.46	64.38	0.85	11960.7
2	18.26	18.26	18.21	tr|Q7DMU0	Storage protein OS=Triticum aestivum OX=4565 GN=Gbl1 PE=4 SV=1; Embryo globulin OS=Hordeum vulgare OX=4513 GN=Beg1 PE=2 SV=1	0	99	LAVVLEGEGEVQIVCPH	Carbamidomethyl(C)@15		cleaved H-L@C-term	0.00647509	1847.95	616.991	1847.95	616.989	3	21	7.1.1.5467.4	64.8628	4825.39	4160.16	65.6	1.32	11133.2
2	18.26	18.26	18.21	tr|Q7DMU0	Storage protein OS=Triticum aestivum OX=4565 GN=Gbl1 PE=4 SV=1; Embryo globulin OS=Hordeum vulgare OX=4513 GN=Beg1 PE=2 SV=1	0	99	LAVVLEGEGEVQIVCPH	Carbamidomethyl(C)@15		cleaved H-L@C-term	0.00647509	1847.95	616.991	1847.95	616.989	3	23	7.1.1.5468.3	64.953	4825.39	4457.82	65.6	1.32	11470
2	18.26	18.26	18.21	tr|Q7DMU0	Storage protein OS=Triticum aestivum OX=4565 GN=Gbl1 PE=4 SV=1; Embryo globulin OS=Hordeum vulgare OX=4513 GN=Beg1 PE=2 SV=1	0	99	LAVVLEGEGEVQIVCPH	Carbamidomethyl(C)@15		cleaved H-L@C-term	0.00647509	1847.95	616.991	1847.95	616.989	3	22	7.1.1.5469.5	65.0559	4825.39	4519.88	65.6	1.32	11399.2
2	18.26	18.26	18.21	tr|Q7DMU0	Storage protein OS=Triticum aestivum OX=4565 GN=Gbl1 PE=4 SV=1; Embryo globulin OS=Hordeum vulgare OX=4513 GN=Beg1 PE=2 SV=1	0	99	LAVVLEGEGEVQIVCPH	Carbamidomethyl(C)@15		cleaved H-L@C-term	0.00647509	1847.95	616.991	1847.95	616.989	3	23	7.1.1.5470.3	65.1421	4825.39	4656.65	65.6	1.32	11452.7
2	18.26	18.26	18.21	tr|Q7DMU0	Storage protein OS=Triticum aestivum OX=4565 GN=Gbl1 PE=4 SV=1; Embryo globulin OS=Hordeum vulgare OX=4513 GN=Beg1 PE=2 SV=1	0	99	LAVVLEGEGEVQIVCPH	Carbamidomethyl(C)@15		cleaved H-L@C-term	0.00647509	1847.95	616.991	1847.95	616.989	3	23	7.1.1.5471.5	65.245	4825.39	4809.97	65.6	1.32	11660
2	18.26	18.26	18.21	tr|Q7DMU0	Storage protein OS=Triticum aestivum OX=4565 GN=Gbl1 PE=4 SV=1; Embryo globulin OS=Hordeum vulgare OX=4513 GN=Beg1 PE=2 SV=1	0	99	LAVVLEGEGEVQIVCPH	Carbamidomethyl(C)@15		cleaved H-L@C-term	0.00647509	1847.95	616.991	1847.95	616.989	3	23	7.1.1.5472.3	65.3314	4825.39	4765.8	65.6	1.32	11619.4
2	18.26	18.26	18.21	tr|Q7DMU0	Storage protein OS=Triticum aestivum OX=4565 GN=Gbl1 PE=4 SV=1; Embryo globulin OS=Hordeum vulgare OX=4513 GN=Beg1 PE=2 SV=1	0	99	LAVVLEGEGEVQIVCPH	Carbamidomethyl(C)@15		cleaved H-L@C-term	0.00647509	1847.95	616.991	1847.95	616.989	3	23	7.1.1.5473.4	65.43	4825.39	4782.99	65.6	1.32	11406.9
2	18.26	18.26	18.21	tr|Q7DMU0	Storage protein OS=Triticum aestivum OX=4565 GN=Gbl1 PE=4 SV=1; Embryo globulin OS=Hordeum vulgare OX=4513 GN=Beg1 PE=2 SV=1	0	99	LAVVLEGEGEVQIVCPH	Carbamidomethyl(C)@15		cleaved H-L@C-term	0.00647509	1847.95	616.991	1847.95	616.989	3	22	7.1.1.5474.6	65.533	4825.39	4777.53	65.6	1.32	11903.5
2	18.26	18.26	18.21	tr|Q7DMU0	Storage protein OS=Triticum aestivum OX=4565 GN=Gbl1 PE=4 SV=1; Embryo globulin OS=Hordeum vulgare OX=4513 GN=Beg1 PE=2 SV=1	0	99	LAVVLEGEGEVQIVCPH	Carbamidomethyl(C)@15		cleaved H-L@C-term	0.00647509	1847.95	616.991	1847.95	616.989	3	22	7.1.1.5475.4	65.6195	4825.39	4745.87	65.6	1.32	12752.3
2	18.26	18.26	18.21	tr|Q7DMU0	Storage protein OS=Triticum aestivum OX=4565 GN=Gbl1 PE=4 SV=1; Embryo globulin OS=Hordeum vulgare OX=4513 GN=Beg1 PE=2 SV=1	0	99	LAVVLEGEGEVQIVCPH	Carbamidomethyl(C)@15		cleaved H-L@C-term	0.00647509	1847.95	616.991	1847.95	616.989	3	23	7.1.1.5476.5	65.7184	4825.39	4485.59	65.6	1.32	13060.6
2	18.26	18.26	18.21	tr|Q7DMU0	Storage protein OS=Triticum aestivum OX=4565 GN=Gbl1 PE=4 SV=1; Embryo globulin OS=Hordeum vulgare OX=4513 GN=Beg1 PE=2 SV=1	0	99	LAVVLEGEGEVQIVCPH	Carbamidomethyl(C)@15		cleaved H-L@C-term	0.00647509	1847.95	616.991	1847.95	616.989	3	22	7.1.1.5477.6	65.8173	4825.39	4488.34	65.6	1.32	13711.7
2	18.26	18.26	18.21	tr|Q7DMU0	Storage protein OS=Triticum aestivum OX=4565 GN=Gbl1 PE=4 SV=1; Embryo globulin OS=Hordeum vulgare OX=4513 GN=Beg1 PE=2 SV=1	0	99	LAVVLEGEGEVQIVCPH	Carbamidomethyl(C)@15		cleaved H-L@C-term	0.00647509	1847.95	616.991	1847.95	616.989	3	22	7.1.1.5478.5	65.9077	4825.39	4500.95	65.6	1.32	14109.8
2	18.26	18.26	18.21	tr|Q7DMU0	Storage protein OS=Triticum aestivum OX=4565 GN=Gbl1 PE=4 SV=1; Embryo globulin OS=Hordeum vulgare OX=4513 GN=Beg1 PE=2 SV=1	0	99	LAVVLEGEGEVQIVCPH	Carbamidomethyl(C)@15		cleaved H-L@C-term	0.00647509	1847.95	616.991	1847.95	616.989	3	23	7.1.1.5479.6	66.0066	4825.39	4421.28	65.6	1.32	14308.8
2	18.26	18.26	18.21	tr|Q7DMU0	Storage protein OS=Triticum aestivum OX=4565 GN=Gbl1 PE=4 SV=1; Embryo globulin OS=Hordeum vulgare OX=4513 GN=Beg1 PE=2 SV=1	0	99	LAVVLEGEGEVQIVCPH	Carbamidomethyl(C)@15		cleaved H-L@C-term	0.00647509	1847.95	616.991	1847.95	616.989	3	22	7.1.1.5480.8	66.1095	4825.39	4125.74	65.6	1.32	14133.6
2	18.26	18.26	18.21	tr|Q7DMU0	Storage protein OS=Triticum aestivum OX=4565 GN=Gbl1 PE=4 SV=1; Embryo globulin OS=Hordeum vulgare OX=4513 GN=Beg1 PE=2 SV=1	0	99	LAVVLEGEGEVQIVCPH	Carbamidomethyl(C)@15		cleaved H-L@C-term	0.00281331	1847.95	616.99	1847.95	616.989	3	23	7.1.1.5481.7	66.1998	5148.62	4221.99	66.45	1.04	14876.3
2	18.26	18.26	18.21	tr|Q7DMU0	Storage protein OS=Triticum aestivum OX=4565 GN=Gbl1 PE=4 SV=1; Embryo globulin OS=Hordeum vulgare OX=4513 GN=Beg1 PE=2 SV=1	0	99	LAVVLEGEGEVQIVCPH	Carbamidomethyl(C)@15		cleaved H-L@C-term	0.00281331	1847.95	616.99	1847.95	616.989	3	23	7.1.1.5486.6	66.6684	5148.62	4042.72	66.45	1.04	15170.6
2	18.26	18.26	18.21	tr|Q7DMU0	Storage protein OS=Triticum aestivum OX=4565 GN=Gbl1 PE=4 SV=1; Embryo globulin OS=Hordeum vulgare OX=4513 GN=Beg1 PE=2 SV=1	0	99	LAVVLEGEGEVQIVCPH	Carbamidomethyl(C)@15		cleaved H-L@C-term	0.00281331	1847.95	616.99	1847.95	616.989	3	22	7.1.1.5487.7	66.7671	5148.62	4089.5	66.45	1.04	14137.6
2	18.26	18.26	18.21	tr|Q7DMU0	Storage protein OS=Triticum aestivum OX=4565 GN=Gbl1 PE=4 SV=1; Embryo globulin OS=Hordeum vulgare OX=4513 GN=Beg1 PE=2 SV=1	0	99	LAVVLEGEGEVQIVCPH	Carbamidomethyl(C)@15		cleaved H-L@C-term	5.60246e-05	1847.95	924.98	1847.95	924.98	2	23	7.1.1.5487.17	66.8088	3288.66	2715.34	66.55	1.04	18216.4
2	18.26	18.26	18.21	tr|Q7DMU0	Storage protein OS=Triticum aestivum OX=4565 GN=Gbl1 PE=4 SV=1; Embryo globulin OS=Hordeum vulgare OX=4513 GN=Beg1 PE=2 SV=1	0	99	LAVVLEGEGEVQIVCPH	Carbamidomethyl(C)@15		cleaved H-L@C-term	0.00281331	1847.95	616.99	1847.95	616.989	3	21	7.1.1.5488.7	66.8618	5148.62	4220.82	66.45	1.04	13226.5
2	18.26	18.26	18.21	tr|Q7DMU0	Storage protein OS=Triticum aestivum OX=4565 GN=Gbl1 PE=4 SV=1; Embryo globulin OS=Hordeum vulgare OX=4513 GN=Beg1 PE=2 SV=1	0	99	LAVVLEGEGEVQIVCPH	Carbamidomethyl(C)@15		cleaved H-L@C-term	0.00281331	1847.95	616.99	1847.95	616.989	3	21	7.1.1.5489.7	66.9561	5148.62	4139.75	66.45	1.04	12284
2	18.26	18.26	18.21	tr|Q7DMU0	Storage protein OS=Triticum aestivum OX=4565 GN=Gbl1 PE=4 SV=1; Embryo globulin OS=Hordeum vulgare OX=4513 GN=Beg1 PE=2 SV=1	0	99	LAVVLEGEGEVQIVCPH	Carbamidomethyl(C)@15		cleaved H-L@C-term	0.00281331	1847.95	616.99	1847.95	616.989	3	24	7.1.1.5490.7	67.0507	5148.62	4150.95	66.45	1.04	11706.2
2	18.26	18.26	18.21	tr|Q7DMU0	Storage protein OS=Triticum aestivum OX=4565 GN=Gbl1 PE=4 SV=1; Embryo globulin OS=Hordeum vulgare OX=4513 GN=Beg1 PE=2 SV=1	0	99	LAVVLEGEGEVQIVCPH	Carbamidomethyl(C)@15		cleaved H-L@C-term	0.00409494	1847.95	616.99	1847.95	616.989	3	22	7.1.1.5491.6	67.1411	5084.84	4372.27	67.4	1.33	11766
2	18.26	18.26	18.21	tr|Q7DMU0	Storage protein OS=Triticum aestivum OX=4565 GN=Gbl1 PE=4 SV=1; Embryo globulin OS=Hordeum vulgare OX=4513 GN=Beg1 PE=2 SV=1	0	99	LAVVLEGEGEVQIVCPH	Carbamidomethyl(C)@15		cleaved H-L@C-term	0.00409494	1847.95	616.99	1847.95	616.989	3	23	7.1.1.5492.7	67.2398	5084.84	4814.25	67.4	1.33	12363.5
2	18.26	18.26	18.21	tr|Q7DMU0	Storage protein OS=Triticum aestivum OX=4565 GN=Gbl1 PE=4 SV=1; Embryo globulin OS=Hordeum vulgare OX=4513 GN=Beg1 PE=2 SV=1	0	99	LAVVLEGEGEVQIVCPH	Carbamidomethyl(C)@15		cleaved H-L@C-term	0.00409494	1847.95	616.99	1847.95	616.989	3	22	7.1.1.5493.6	67.3306	5084.84	5045.71	67.4	1.33	12920.3
2	18.26	18.26	18.21	tr|Q7DMU0	Storage protein OS=Triticum aestivum OX=4565 GN=Gbl1 PE=4 SV=1; Embryo globulin OS=Hordeum vulgare OX=4513 GN=Beg1 PE=2 SV=1	0	99	LAVVLEGEGEVQIVCPH	Carbamidomethyl(E)@8; Carbamidomethyl(C)@15		cleaved H-L@C-term	0.0089369	1904.98	635.999	1904.97	635.996	3	20	7.1.1.5493.7	67.3347	1441.86	1365.77	67.49	1.23	6985.34
2	18.26	18.26	18.21	tr|Q7DMU0	Storage protein OS=Triticum aestivum OX=4565 GN=Gbl1 PE=4 SV=1; Embryo globulin OS=Hordeum vulgare OX=4513 GN=Beg1 PE=2 SV=1	0	99	LAVVLEGEGEVQIVCPH	Carbamidomethyl(E)@10; Carbamidomethyl(C)@15		cleaved H-L@C-term	0.0089369	1904.98	635.999	1904.97	635.996	3	20	7.1.1.5493.7	67.3347	1441.86	1365.77	67.49	1.23	6985.34
2	18.26	18.26	18.21	tr|Q7DMU0	Storage protein OS=Triticum aestivum OX=4565 GN=Gbl1 PE=4 SV=1; Embryo globulin OS=Hordeum vulgare OX=4513 GN=Beg1 PE=2 SV=1	0	99	LAVVLEGEGEVQIVCPH	Carbamidomethyl(C)@15		cleaved H-L@C-term	0.00409494	1847.95	616.99	1847.95	616.989	3	22	7.1.1.5494.6	67.4251	5084.84	5049.01	67.4	1.33	12502.8
2	18.26	18.26	18.21	tr|Q7DMU0	Storage protein OS=Triticum aestivum OX=4565 GN=Gbl1 PE=4 SV=1; Embryo globulin OS=Hordeum vulgare OX=4513 GN=Beg1 PE=2 SV=1	0	99	LAVVLEGEGEVQIVCPH	Carbamidomethyl(C)@15		cleaved H-L@C-term	0.00409494	1847.95	616.99	1847.95	616.989	3	22	7.1.1.5495.6	67.5202	5084.84	4885.25	67.4	1.33	12205.8
2	18.26	18.26	18.21	tr|Q7DMU0	Storage protein OS=Triticum aestivum OX=4565 GN=Gbl1 PE=4 SV=1; Embryo globulin OS=Hordeum vulgare OX=4513 GN=Beg1 PE=2 SV=1	0	99	LAVVLEGEGEVQIVCPH	Carbamidomethyl(C)@15		cleaved H-L@C-term	0.00409494	1847.95	616.99	1847.95	616.989	3	22	7.1.1.5496.6	67.6149	5084.84	4632.35	67.4	1.33	11523.5
2	18.26	18.26	18.21	tr|Q7DMU0	Storage protein OS=Triticum aestivum OX=4565 GN=Gbl1 PE=4 SV=1; Embryo globulin OS=Hordeum vulgare OX=4513 GN=Beg1 PE=2 SV=1	0	99	LAVVLEGEGEVQIVCPH	Carbamidomethyl(C)@15		cleaved H-L@C-term	0.00409494	1847.95	616.99	1847.95	616.989	3	22	7.1.1.5497.5	67.7053	5084.84	4390.57	67.4	1.33	11555.7
2	18.26	18.26	18.21	tr|Q7DMU0	Storage protein OS=Triticum aestivum OX=4565 GN=Gbl1 PE=4 SV=1; Embryo globulin OS=Hordeum vulgare OX=4513 GN=Beg1 PE=2 SV=1	0	99	LAVVLEGEGEVQIVCPH	Carbamidomethyl(C)@15		cleaved H-L@C-term	0.00409494	1847.95	616.99	1847.95	616.989	3	24	7.1.1.5498.5	67.8002	5084.84	4136.86	67.4	1.33	10892.2
2	18.26	18.26	18.21	tr|Q7DMU0	Storage protein OS=Triticum aestivum OX=4565 GN=Gbl1 PE=4 SV=1; Embryo globulin OS=Hordeum vulgare OX=4513 GN=Beg1 PE=2 SV=1	0	99	LAVVLEGEGEVQIVCPH	Carbamidomethyl(C)@15		cleaved H-L@C-term	0.00427803	1847.95	616.99	1847.95	616.989	3	22	7.1.1.5499.5	67.8947	4475.12	4045.9	68.25	0.76	10216.7
2	18.26	18.26	18.21	tr|Q7DMU0	Storage protein OS=Triticum aestivum OX=4565 GN=Gbl1 PE=4 SV=1; Embryo globulin OS=Hordeum vulgare OX=4513 GN=Beg1 PE=2 SV=1	0	99	LAVVLEGEGEVQIVCPH	Carbamidomethyl(C)@15		cleaved H-L@C-term	0.00427803	1847.95	616.99	1847.95	616.989	3	22	7.1.1.5500.5	67.9895	4475.12	4066.04	68.25	0.76	9837.43
2	18.26	18.26	18.21	tr|Q7DMU0	Storage protein OS=Triticum aestivum OX=4565 GN=Gbl1 PE=4 SV=1; Embryo globulin OS=Hordeum vulgare OX=4513 GN=Beg1 PE=2 SV=1	0	99	LAVVLEGEGEVQIVCPH	Carbamidomethyl(C)@15		cleaved H-L@C-term	0.00427803	1847.95	616.99	1847.95	616.989	3	22	7.1.1.5501.5	68.0842	4475.12	4129.01	68.25	0.76	10323.2
2	18.26	18.26	18.21	tr|Q7DMU0	Storage protein OS=Triticum aestivum OX=4565 GN=Gbl1 PE=4 SV=1; Embryo globulin OS=Hordeum vulgare OX=4513 GN=Beg1 PE=2 SV=1	0	99	LAVVLEGEGEVQIVCPH	Carbamidomethyl(C)@15		cleaved H-L@C-term	0.00427803	1847.95	616.99	1847.95	616.989	3	23	7.1.1.5502.6	68.1831	4475.12	4403.76	68.25	0.76	11297.2
2	18.26	18.26	18.21	tr|Q7DMU0	Storage protein OS=Triticum aestivum OX=4565 GN=Gbl1 PE=4 SV=1; Embryo globulin OS=Hordeum vulgare OX=4513 GN=Beg1 PE=2 SV=1	0	99	LAVVLEGEGEVQIVCPH	Carbamidomethyl(C)@15		cleaved H-L@C-term	0.00427803	1847.95	616.99	1847.95	616.989	3	22	7.1.1.5503.6	68.278	4475.12	4474.16	68.25	0.76	11220.5
2	18.26	18.26	18.21	tr|Q7DMU0	Storage protein OS=Triticum aestivum OX=4565 GN=Gbl1 PE=4 SV=1; Embryo globulin OS=Hordeum vulgare OX=4513 GN=Beg1 PE=2 SV=1	0	99	LAVVLEGEGEVQIVCPH	Carbamidomethyl(C)@15		cleaved H-L@C-term	0.00427803	1847.95	616.99	1847.95	616.989	3	22	7.1.1.5504.4	68.3644	4475.12	4380.65	68.25	0.76	10748.2
2	18.26	18.26	18.21	tr|Q7DMU0	Storage protein OS=Triticum aestivum OX=4565 GN=Gbl1 PE=4 SV=1; Embryo globulin OS=Hordeum vulgare OX=4513 GN=Beg1 PE=2 SV=1	0	99	LAVVLEGEGEVQIVCPH	Carbamidomethyl(C)@15		cleaved H-L@C-term	0.00427803	1847.95	616.99	1847.95	616.989	3	23	7.1.1.5505.5	68.4632	4475.12	3955.18	68.25	0.76	10423.2
2	18.26	18.26	18.21	tr|Q7DMU0	Storage protein OS=Triticum aestivum OX=4565 GN=Gbl1 PE=4 SV=1; Embryo globulin OS=Hordeum vulgare OX=4513 GN=Beg1 PE=2 SV=1	0	99	LAVVLEGEGEVQIVCPH	Carbamidomethyl(C)@15		cleaved H-L@C-term	0.00427803	1847.95	616.99	1847.95	616.989	3	21	7.1.1.5506.5	68.5579	4475.12	3810.83	68.25	0.76	9987.24
2	18.26	18.26	18.21	tr|Q7DMU0	Storage protein OS=Triticum aestivum OX=4565 GN=Gbl1 PE=4 SV=1; Embryo globulin OS=Hordeum vulgare OX=4513 GN=Beg1 PE=2 SV=1	0	99	LAVVLEGEGEVQIVCPH	Carbamidomethyl(C)@15		cleaved H-L@C-term	0.00317949	1847.95	616.99	1847.95	616.989	3	23	7.1.1.5507.4	68.6483	4505.91	3985.1	68.82	0.57	9991.43
2	18.26	18.26	18.21	tr|Q7DMU0	Storage protein OS=Triticum aestivum OX=4565 GN=Gbl1 PE=4 SV=1; Embryo globulin OS=Hordeum vulgare OX=4513 GN=Beg1 PE=2 SV=1	0	99	LAVVLEGEGEVQIVCPH	Carbamidomethyl(C)@15		cleaved H-L@C-term	0.00317949	1847.95	616.99	1847.95	616.989	3	23	7.1.1.5508.5	68.7472	4505.91	4251.88	68.82	0.57	10812.5
2	18.26	18.26	18.21	tr|Q7DMU0	Storage protein OS=Triticum aestivum OX=4565 GN=Gbl1 PE=4 SV=1; Embryo globulin OS=Hordeum vulgare OX=4513 GN=Beg1 PE=2 SV=1	0	99	LAVVLEGEGEVQIVCPH	Carbamidomethyl(C)@15		cleaved H-L@C-term	0.00317949	1847.95	616.99	1847.95	616.989	3	21	7.1.1.5509.5	68.8418	4505.91	4497.02	68.82	0.57	11242.5
2	18.26	18.26	18.21	tr|Q7DMU0	Storage protein OS=Triticum aestivum OX=4565 GN=Gbl1 PE=4 SV=1; Embryo globulin OS=Hordeum vulgare OX=4513 GN=Beg1 PE=2 SV=1	0	99	LAVVLEGEGEVQIVCPH	Carbamidomethyl(C)@15		cleaved H-L@C-term	0.00317949	1847.95	616.99	1847.95	616.989	3	22	7.1.1.5510.5	68.9368	4505.91	4465.12	68.82	0.57	11519.7
2	18.26	18.26	18.21	tr|Q7DMU0	Storage protein OS=Triticum aestivum OX=4565 GN=Gbl1 PE=4 SV=1; Embryo globulin OS=Hordeum vulgare OX=4513 GN=Beg1 PE=2 SV=1	0	99	LAVVLEGEGEVQIVCPH	Carbamidomethyl(C)@15		cleaved H-L@C-term	0.00317949	1847.95	616.99	1847.95	616.989	3	22	7.1.1.5511.7	69.0397	4505.91	4430.76	68.82	0.57	11323.5
2	18.26	18.26	18.21	tr|Q7DMU0	Storage protein OS=Triticum aestivum OX=4565 GN=Gbl1 PE=4 SV=1; Embryo globulin OS=Hordeum vulgare OX=4513 GN=Beg1 PE=2 SV=1	0	99	LAVVLEGEGEVQIVCPH	Carbamidomethyl(C)@15		cleaved H-L@C-term	0.00427803	1847.95	616.99	1847.95	616.989	3	21	7.1.1.5512.6	69.1306	4434.92	4398.27	69.29	1.33	11146.7
2	18.26	18.26	18.21	tr|Q7DMU0	Storage protein OS=Triticum aestivum OX=4565 GN=Gbl1 PE=4 SV=1; Embryo globulin OS=Hordeum vulgare OX=4513 GN=Beg1 PE=2 SV=1	0	99	LAVVLEGEGEVQIVCPH	Carbamidomethyl(C)@15		cleaved H-L@C-term	0.00427803	1847.95	616.99	1847.95	616.989	3	21	7.1.1.5513.6	69.2255	4434.92	4395.75	69.29	1.33	11182.2
2	18.26	18.26	18.21	tr|Q7DMU0	Storage protein OS=Triticum aestivum OX=4565 GN=Gbl1 PE=4 SV=1; Embryo globulin OS=Hordeum vulgare OX=4513 GN=Beg1 PE=2 SV=1	0	99	LAVVLEGEGEVQIVCPH	Carbamidomethyl(C)@15		cleaved H-L@C-term	0.00427803	1847.95	616.99	1847.95	616.989	3	21	7.1.1.5514.8	69.3285	4434.92	4303.13	69.29	1.33	11224.5
2	18.26	18.26	18.21	tr|Q7DMU0	Storage protein OS=Triticum aestivum OX=4565 GN=Gbl1 PE=4 SV=1; Embryo globulin OS=Hordeum vulgare OX=4513 GN=Beg1 PE=2 SV=1	0	99	LAVVLEGEGEVQIVCPH	Carbamidomethyl(C)@15		cleaved H-L@C-term	0.00427803	1847.95	616.99	1847.95	616.989	3	23	7.1.1.5515.5	69.4108	4434.92	4276.75	69.29	1.33	11071
2	18.26	18.26	18.21	tr|Q7DMU0	Storage protein OS=Triticum aestivum OX=4565 GN=Gbl1 PE=4 SV=1; Embryo globulin OS=Hordeum vulgare OX=4513 GN=Beg1 PE=2 SV=1	0	99	LAVVLEGEGEVQIVCPH	Carbamidomethyl(C)@15		cleaved H-L@C-term	0.00427803	1847.95	616.99	1847.95	616.989	3	23	7.1.1.5516.6	69.5096	4434.92	4165.4	69.29	1.33	10558.2
2	18.26	18.26	18.21	tr|Q7DMU0	Storage protein OS=Triticum aestivum OX=4565 GN=Gbl1 PE=4 SV=1; Embryo globulin OS=Hordeum vulgare OX=4513 GN=Beg1 PE=2 SV=1	0	99	LAVVLEGEGEVQIVCPH	Carbamidomethyl(C)@15		cleaved H-L@C-term	0.00427803	1847.95	616.99	1847.95	616.989	3	24	7.1.1.5517.6	69.6044	4434.92	4138.91	69.29	1.33	10141.4
2	18.26	18.26	18.21	tr|Q7DMU0	Storage protein OS=Triticum aestivum OX=4565 GN=Gbl1 PE=4 SV=1; Embryo globulin OS=Hordeum vulgare OX=4513 GN=Beg1 PE=2 SV=1	0	99	LAVVLEGEGEVQIVCPH	Carbamidomethyl(C)@15		cleaved H-L@C-term	0.00427803	1847.95	616.99	1847.95	616.989	3	20	7.1.1.5518.6	69.6993	4434.92	4114.39	69.29	1.33	10096.9
2	18.26	18.26	18.21	tr|Q7DMU0	Storage protein OS=Triticum aestivum OX=4565 GN=Gbl1 PE=4 SV=1; Embryo globulin OS=Hordeum vulgare OX=4513 GN=Beg1 PE=2 SV=1	0	99	LAVVLEGEGEVQIVCPH	Carbamidomethyl(C)@15		cleaved H-L@C-term	0.00427803	1847.95	616.99	1847.95	616.989	3	22	7.1.1.5519.7	69.7982	4434.92	4085.97	69.29	1.33	9752.17
2	18.26	18.26	18.21	tr|Q7DMU0	Storage protein OS=Triticum aestivum OX=4565 GN=Gbl1 PE=4 SV=1; Embryo globulin OS=Hordeum vulgare OX=4513 GN=Beg1 PE=2 SV=1	0	99	LAVVLEGEGEVQIVCPH	Carbamidomethyl(C)@15		cleaved H-L@C-term	0.00427803	1847.95	616.99	1847.95	616.989	3	22	7.1.1.5520.6	69.8888	4434.92	4096.82	69.29	1.33	9652.92
2	18.26	18.26	18.21	tr|Q7DMU0	Storage protein OS=Triticum aestivum OX=4565 GN=Gbl1 PE=4 SV=1; Embryo globulin OS=Hordeum vulgare OX=4513 GN=Beg1 PE=2 SV=1	0	99	LAVVLEGEGEVQIVCPH	Carbamidomethyl(C)@15		cleaved H-L@C-term	0.00427803	1847.95	616.99	1847.95	616.989	3	21	7.1.1.5521.7	69.988	4434.92	4041.04	69.29	1.33	9639.23
2	18.26	18.26	18.21	tr|Q7DMU0	Storage protein OS=Triticum aestivum OX=4565 GN=Gbl1 PE=4 SV=1; Embryo globulin OS=Hordeum vulgare OX=4513 GN=Beg1 PE=2 SV=1	0	99	LAVVLEGEGEVQIVCPH	Carbamidomethyl(C)@15		cleaved H-L@C-term	0.00427803	1847.95	616.99	1847.95	616.989	3	20	7.1.1.5522.7	70.0827	4434.92	4019.97	69.29	1.33	10125.9
2	18.26	18.26	18.21	tr|Q7DMU0	Storage protein OS=Triticum aestivum OX=4565 GN=Gbl1 PE=4 SV=1; Embryo globulin OS=Hordeum vulgare OX=4513 GN=Beg1 PE=2 SV=1	0	99	LAVVLEGEGEVQIVCPH	Carbamidomethyl(C)@15		cleaved H-L@C-term	0.00427803	1847.95	616.99	1847.95	616.989	3	21	7.1.1.5523.5	70.1693	4434.92	4041.72	69.29	1.33	10157.4
2	18.26	18.26	18.21	tr|Q7DMU0	Storage protein OS=Triticum aestivum OX=4565 GN=Gbl1 PE=4 SV=1; Embryo globulin OS=Hordeum vulgare OX=4513 GN=Beg1 PE=2 SV=1	0	99	LAVVLEGEGEVQIVCPH	Carbamidomethyl(C)@15		cleaved H-L@C-term	0.00427803	1847.95	616.99	1847.95	616.989	3	22	7.1.1.5524.5	70.264	4434.92	4041.57	69.29	1.33	10453
2	18.26	18.26	18.21	tr|Q7DMU0	Storage protein OS=Triticum aestivum OX=4565 GN=Gbl1 PE=4 SV=1; Embryo globulin OS=Hordeum vulgare OX=4513 GN=Beg1 PE=2 SV=1	0	99	LAVVLEGEGEVQIVCPH	Carbamidomethyl(C)@15		cleaved H-L@C-term	0.00281331	1847.95	616.99	1847.95	616.989	3	22	7.1.1.5525.7	70.367	4516.33	4197.9	71.09	1.8	9962.43
2	18.26	18.26	18.21	tr|Q7DMU0	Storage protein OS=Triticum aestivum OX=4565 GN=Gbl1 PE=4 SV=1; Embryo globulin OS=Hordeum vulgare OX=4513 GN=Beg1 PE=2 SV=1	0	99	LAVVLEGEGEVQIVCPH	Carbamidomethyl(C)@15		cleaved H-L@C-term	0.00281331	1847.95	616.99	1847.95	616.989	3	22	7.1.1.5526.7	70.4621	4516.33	4139.35	71.09	1.8	9666.42
2	18.26	18.26	18.21	tr|Q7DMU0	Storage protein OS=Triticum aestivum OX=4565 GN=Gbl1 PE=4 SV=1; Embryo globulin OS=Hordeum vulgare OX=4513 GN=Beg1 PE=2 SV=1	0	99	LAVVLEGEGEVQIVCPH	Carbamidomethyl(C)@15		cleaved H-L@C-term	0.00281331	1847.95	616.99	1847.95	616.989	3	22	7.1.1.5527.6	70.5525	4516.33	3964.21	71.09	1.8	9516.67
2	18.26	18.26	18.21	tr|Q7DMU0	Storage protein OS=Triticum aestivum OX=4565 GN=Gbl1 PE=4 SV=1; Embryo globulin OS=Hordeum vulgare OX=4513 GN=Beg1 PE=2 SV=1	0	99	LAVVLEGEGEVQIVCPH	Carbamidomethyl(C)@15; Carbamidomethyl(H)@17		cleaved H-L@C-term	0.00673984	1904.97	635.998	1904.97	635.996	3	20	7.1.1.5527.7	70.5567	1003.3	828.97	70.52	1.33	5111.28
2	18.26	18.26	18.21	tr|Q7DMU0	Storage protein OS=Triticum aestivum OX=4565 GN=Gbl1 PE=4 SV=1; Embryo globulin OS=Hordeum vulgare OX=4513 GN=Beg1 PE=2 SV=1	0	99	LAVVLEGEGEVQIVCPH	Carbamidomethyl(C)@15		cleaved H-L@C-term	0.00281331	1847.95	616.99	1847.95	616.989	3	21	7.1.1.5528.7	70.6514	4516.33	3857.54	71.09	1.8	9304.16
2	18.26	18.26	18.21	tr|Q7DMU0	Storage protein OS=Triticum aestivum OX=4565 GN=Gbl1 PE=4 SV=1; Embryo globulin OS=Hordeum vulgare OX=4513 GN=Beg1 PE=2 SV=1	0	99	LAVVLEGEGEVQIVCPH	Carbamidomethyl(C)@15		cleaved H-L@C-term	0.00281331	1847.95	616.99	1847.95	616.989	3	21	7.1.1.5529.7	70.7461	4516.33	3836.84	71.09	1.8	9506.42
2	18.26	18.26	18.21	tr|Q7DMU0	Storage protein OS=Triticum aestivum OX=4565 GN=Gbl1 PE=4 SV=1; Embryo globulin OS=Hordeum vulgare OX=4513 GN=Beg1 PE=2 SV=1	0	99	LAVVLEGEGEVQIVCPH	Carbamidomethyl(C)@15		cleaved H-L@C-term	0.00281331	1847.95	616.99	1847.95	616.989	3	23	7.1.1.5530.7	70.841	4516.33	3940.35	71.09	1.8	10137.4
2	18.26	18.26	18.21	tr|Q7DMU0	Storage protein OS=Triticum aestivum OX=4565 GN=Gbl1 PE=4 SV=1; Embryo globulin OS=Hordeum vulgare OX=4513 GN=Beg1 PE=2 SV=1	0	99	LAVVLEGEGEVQIVCPH	Carbamidomethyl(C)@15		cleaved H-L@C-term	0.00281331	1847.95	616.99	1847.95	616.989	3	23	7.1.1.5531.7	70.9357	4516.33	4128.47	71.09	1.8	10077.4
2	18.26	18.26	18.21	tr|Q7DMU0	Storage protein OS=Triticum aestivum OX=4565 GN=Gbl1 PE=4 SV=1; Embryo globulin OS=Hordeum vulgare OX=4513 GN=Beg1 PE=2 SV=1	0	99	LAVVLEGEGEVQIVCPH	Carbamidomethyl(C)@15		cleaved H-L@C-term	0.00281331	1847.95	616.99	1847.95	616.989	3	23	7.1.1.5532.6	71.0263	4516.33	4346.29	71.09	1.8	10260.9
2	18.26	18.26	18.21	tr|Q7DMU0	Storage protein OS=Triticum aestivum OX=4565 GN=Gbl1 PE=4 SV=1; Embryo globulin OS=Hordeum vulgare OX=4513 GN=Beg1 PE=2 SV=1	0	99	LAVVLEGEGEVQIVCPH	Carbamidomethyl(C)@15		cleaved H-L@C-term	0.00281331	1847.95	616.99	1847.95	616.989	3	24	7.1.1.5533.7	71.1252	4516.33	4420.82	71.09	1.8	10234.4
2	18.26	18.26	18.21	tr|Q7DMU0	Storage protein OS=Triticum aestivum OX=4565 GN=Gbl1 PE=4 SV=1; Embryo globulin OS=Hordeum vulgare OX=4513 GN=Beg1 PE=2 SV=1	0	99	LAVVLEGEGEVQIVCPH	Carbamidomethyl(C)@15		cleaved H-L@C-term	0.00281331	1847.95	616.99	1847.95	616.989	3	23	7.1.1.5534.7	71.22	4516.33	4157.07	71.09	1.8	10173.7
2	18.26	18.26	18.21	tr|Q7DMU0	Storage protein OS=Triticum aestivum OX=4565 GN=Gbl1 PE=4 SV=1; Embryo globulin OS=Hordeum vulgare OX=4513 GN=Beg1 PE=2 SV=1	0	99	LAVVLEGEGEVQIVCPH	Carbamidomethyl(C)@15		cleaved H-L@C-term	0.00281331	1847.95	616.99	1847.95	616.989	3	23	7.1.1.5535.6	71.3105	4516.33	3960.94	71.09	1.8	9436.16
2	18.26	18.26	18.21	tr|Q7DMU0	Storage protein OS=Triticum aestivum OX=4565 GN=Gbl1 PE=4 SV=1; Embryo globulin OS=Hordeum vulgare OX=4513 GN=Beg1 PE=2 SV=1	0	99	LAVVLEGEGEVQIVCPH	Carbamidomethyl(C)@15		cleaved H-L@C-term	0.00281331	1847.95	616.99	1847.95	616.989	3	21	7.1.1.5536.5	71.4011	4516.33	3851.47	71.09	1.8	9254.41
2	18.26	18.26	18.21	tr|Q7DMU0	Storage protein OS=Triticum aestivum OX=4565 GN=Gbl1 PE=4 SV=1; Embryo globulin OS=Hordeum vulgare OX=4513 GN=Beg1 PE=2 SV=1	0	99	LAVVLEGEGEVQIVCPH	Carbamidomethyl(C)@15		cleaved H-L@C-term	0.00501038	1847.95	616.991	1847.95	616.989	3	21	7.1.1.5537.7	71.5042	4118.25	3942.3	71.76	0.95	9315.41
2	18.26	18.26	18.21	tr|Q7DMU0	Storage protein OS=Triticum aestivum OX=4565 GN=Gbl1 PE=4 SV=1; Embryo globulin OS=Hordeum vulgare OX=4513 GN=Beg1 PE=2 SV=1	0	99	LAVVLEGEGEVQIVCPH	Carbamidomethyl(C)@15		cleaved H-L@C-term	0.00501038	1847.95	616.991	1847.95	616.989	3	23	7.1.1.5538.7	71.5991	4118.25	4002.45	71.76	0.95	9506.67
2	18.26	18.26	18.21	tr|Q7DMU0	Storage protein OS=Triticum aestivum OX=4565 GN=Gbl1 PE=4 SV=1; Embryo globulin OS=Hordeum vulgare OX=4513 GN=Beg1 PE=2 SV=1	0	99	LAVVLEGEGEVQIVCPH	Carbamidomethyl(C)@15		cleaved H-L@C-term	0.00501038	1847.95	616.991	1847.95	616.989	3	23	7.1.1.5539.6	71.6896	4118.25	4084.37	71.76	0.95	9731.55
2	18.26	18.26	18.21	tr|Q7DMU0	Storage protein OS=Triticum aestivum OX=4565 GN=Gbl1 PE=4 SV=1; Embryo globulin OS=Hordeum vulgare OX=4513 GN=Beg1 PE=2 SV=1	0	99	LAVVLEGEGEVQIVCPH	Carbamidomethyl(C)@15		cleaved H-L@C-term	0.00501038	1847.95	616.991	1847.95	616.989	3	21	7.1.1.5540.6	71.7849	4118.25	4077.77	71.76	0.95	9780.67
2	18.26	18.26	18.21	tr|Q7DMU0	Storage protein OS=Triticum aestivum OX=4565 GN=Gbl1 PE=4 SV=1; Embryo globulin OS=Hordeum vulgare OX=4513 GN=Beg1 PE=2 SV=1	0	99	LAVVLEGEGEVQIVCPH	Carbamidomethyl(C)@15		cleaved H-L@C-term	0.00501038	1847.95	616.991	1847.95	616.989	3	23	7.1.1.5541.7	71.8838	4118.25	3893.21	71.76	0.95	9337.66
2	18.26	18.26	18.21	tr|Q7DMU0	Storage protein OS=Triticum aestivum OX=4565 GN=Gbl1 PE=4 SV=1; Embryo globulin OS=Hordeum vulgare OX=4513 GN=Beg1 PE=2 SV=1	0	99	LAVVLEGEGEVQIVCPH	Carbamidomethyl(C)@15		cleaved H-L@C-term	0.00501038	1847.95	616.991	1847.95	616.989	3	23	7.1.1.5542.8	71.9828	4118.25	3665.38	71.76	0.95	9236.16
2	18.26	18.26	18.21	tr|Q7DMU0	Storage protein OS=Triticum aestivum OX=4565 GN=Gbl1 PE=4 SV=1; Embryo globulin OS=Hordeum vulgare OX=4513 GN=Beg1 PE=2 SV=1	0	99	LAVVLEGEGEVQIVCPH	Carbamidomethyl(C)@15		cleaved H-L@C-term	0.00501038	1847.95	616.991	1847.95	616.989	3	23	7.1.1.5543.7	72.0735	4118.25	3539.82	71.76	0.95	8805.21
2	18.26	18.26	18.21	tr|Q7DMU0	Storage protein OS=Triticum aestivum OX=4565 GN=Gbl1 PE=4 SV=1; Embryo globulin OS=Hordeum vulgare OX=4513 GN=Beg1 PE=2 SV=1	0	99	LAVVLEGEGEVQIVCPH	Carbamidomethyl(C)@15		cleaved H-L@C-term	0.00501038	1847.95	616.991	1847.95	616.989	3	21	7.1.1.5544.7	72.1684	4118.25	3529.82	71.76	0.95	8539.38
2	18.26	18.26	18.21	tr|Q7DMU0	Storage protein OS=Triticum aestivum OX=4565 GN=Gbl1 PE=4 SV=1; Embryo globulin OS=Hordeum vulgare OX=4513 GN=Beg1 PE=2 SV=1	0	99	LAVVLEGEGEVQIVCPH	Carbamidomethyl(C)@15		cleaved H-L@C-term	0.00427803	1847.95	616.99	1847.95	616.989	3	20	7.1.1.5545.8	72.2672	4000.62	3745.17	72.89	1.33	8383.13
2	18.26	18.26	18.21	tr|Q7DMU0	Storage protein OS=Triticum aestivum OX=4565 GN=Gbl1 PE=4 SV=1; Embryo globulin OS=Hordeum vulgare OX=4513 GN=Beg1 PE=2 SV=1	0	99	LAVVLEGEGEVQIVCPH	Carbamidomethyl(C)@15		cleaved H-L@C-term	0.00427803	1847.95	616.99	1847.95	616.989	3	21	7.1.1.5546.8	72.3624	4000.62	3819.69	72.89	1.33	8565.39
2	18.26	18.26	18.21	tr|Q7DMU0	Storage protein OS=Triticum aestivum OX=4565 GN=Gbl1 PE=4 SV=1; Embryo globulin OS=Hordeum vulgare OX=4513 GN=Beg1 PE=2 SV=1	0	99	LAVVLEGEGEVQIVCPH	Carbamidomethyl(C)@15		cleaved H-L@C-term	0.00427803	1847.95	616.99	1847.95	616.989	3	20	7.1.1.5547.6	72.4486	4000.62	3861.42	72.89	1.33	9049.15
2	18.26	18.26	18.21	tr|Q7DMU0	Storage protein OS=Triticum aestivum OX=4565 GN=Gbl1 PE=4 SV=1; Embryo globulin OS=Hordeum vulgare OX=4513 GN=Beg1 PE=2 SV=1	0	99	LAVVLEGEGEVQIVCPH	Carbamidomethyl(C)@15		cleaved H-L@C-term	0.00427803	1847.95	616.99	1847.95	616.989	3	22	7.1.1.5548.8	72.552	4000.62	3787.1	72.89	1.33	8909.15
2	18.26	18.26	18.21	tr|Q7DMU0	Storage protein OS=Triticum aestivum OX=4565 GN=Gbl1 PE=4 SV=1; Embryo globulin OS=Hordeum vulgare OX=4513 GN=Beg1 PE=2 SV=1	0	99	LAVVLEGEGEVQIVCPH	Carbamidomethyl(C)@15		cleaved H-L@C-term	0.00427803	1847.95	616.99	1847.95	616.989	3	22	7.1.1.5549.7	72.6427	4000.62	3745.04	72.89	1.33	8938.4
2	18.26	18.26	18.21	tr|Q7DMU0	Storage protein OS=Triticum aestivum OX=4565 GN=Gbl1 PE=4 SV=1; Embryo globulin OS=Hordeum vulgare OX=4513 GN=Beg1 PE=2 SV=1	0	99	LAVVLEGEGEVQIVCPH	Carbamidomethyl(C)@15		cleaved H-L@C-term	0.00427803	1847.95	616.99	1847.95	616.989	3	22	7.1.1.5550.6	72.7335	4000.62	3777.48	72.89	1.33	9131.16
2	18.26	18.26	18.21	tr|Q7DMU0	Storage protein OS=Triticum aestivum OX=4565 GN=Gbl1 PE=4 SV=1; Embryo globulin OS=Hordeum vulgare OX=4513 GN=Beg1 PE=2 SV=1	0	99	LAVVLEGEGEVQIVCPH	Carbamidomethyl(C)@15		cleaved H-L@C-term	0.00427803	1847.95	616.99	1847.95	616.989	3	21	7.1.1.5551.5	72.8241	4000.62	3914.63	72.89	1.33	9364.16
2	18.26	18.26	18.21	tr|Q7DMU0	Storage protein OS=Triticum aestivum OX=4565 GN=Gbl1 PE=4 SV=1; Embryo globulin OS=Hordeum vulgare OX=4513 GN=Beg1 PE=2 SV=1	0	99	LAVVLEGEGEVQIVCPH	Carbamidomethyl(C)@15		cleaved H-L@C-term	0.00427803	1847.95	616.99	1847.95	616.989	3	21	7.1.1.5552.7	72.9274	4000.62	3960.6	72.89	1.33	9559.42
2	18.26	18.26	18.21	tr|Q7DMU0	Storage protein OS=Triticum aestivum OX=4565 GN=Gbl1 PE=4 SV=1; Embryo globulin OS=Hordeum vulgare OX=4513 GN=Beg1 PE=2 SV=1	0	99	LAVVLEGEGEVQIVCPH	Carbamidomethyl(C)@15		cleaved H-L@C-term	0.00427803	1847.95	616.99	1847.95	616.989	3	23	7.1.1.5553.7	73.0222	4000.62	3832.2	72.89	1.33	9393.66
2	18.26	18.26	18.21	tr|Q7DMU0	Storage protein OS=Triticum aestivum OX=4565 GN=Gbl1 PE=4 SV=1; Embryo globulin OS=Hordeum vulgare OX=4513 GN=Beg1 PE=2 SV=1	0	99	LAVVLEGEGEVQIVCPH	Carbamidomethyl(C)@15		cleaved H-L@C-term	0.00427803	1847.95	616.99	1847.95	616.989	3	22	7.1.1.5554.8	73.1213	4000.62	3632.95	72.89	1.33	8885.15
2	18.26	18.26	18.21	tr|Q7DMU0	Storage protein OS=Triticum aestivum OX=4565 GN=Gbl1 PE=4 SV=1; Embryo globulin OS=Hordeum vulgare OX=4513 GN=Beg1 PE=2 SV=1	0	99	LAVVLEGEGEVQIVCPH	Carbamidomethyl(C)@15		cleaved H-L@C-term	0.00427803	1847.95	616.99	1847.95	616.989	3	21	7.1.1.5555.6	73.2077	4000.62	3449.27	72.89	1.33	8660.14
2	18.26	18.26	18.21	tr|Q7DMU0	Storage protein OS=Triticum aestivum OX=4565 GN=Gbl1 PE=4 SV=1; Embryo globulin OS=Hordeum vulgare OX=4513 GN=Beg1 PE=2 SV=1	0	99	LAVVLEGEGEVQIVCPH	Carbamidomethyl(C)@15		cleaved H-L@C-term	0.00427803	1847.95	616.99	1847.95	616.989	3	20	7.1.1.5556.7	73.3066	4000.62	3447.51	72.89	1.33	8310.13
2	18.26	18.26	18.21	tr|Q7DMU0	Storage protein OS=Triticum aestivum OX=4565 GN=Gbl1 PE=4 SV=1; Embryo globulin OS=Hordeum vulgare OX=4513 GN=Beg1 PE=2 SV=1	0	99	LAVVLEGEGEVQIVCPH	Carbamidomethyl(C)@15		cleaved H-L@C-term	0.00427803	1847.95	616.99	1847.95	616.989	3	20	7.1.1.5557.7	73.4014	4000.62	3505.14	72.89	1.33	8451.64
2	18.26	18.26	18.21	tr|Q7DMU0	Storage protein OS=Triticum aestivum OX=4565 GN=Gbl1 PE=4 SV=1; Embryo globulin OS=Hordeum vulgare OX=4513 GN=Beg1 PE=2 SV=1	0	99	LAVVLEGEGEVQIVCPH	Carbamidomethyl(C)@15		cleaved H-L@C-term	0.00519347	1847.95	616.991	1847.95	616.989	3	20	7.1.1.5558.7	73.4965	3906.04	3589.66	74.13	1.14	8580.14
2	18.26	18.26	18.21	tr|Q7DMU0	Storage protein OS=Triticum aestivum OX=4565 GN=Gbl1 PE=4 SV=1; Embryo globulin OS=Hordeum vulgare OX=4513 GN=Beg1 PE=2 SV=1	0	99	LAVVLEGEGEVQIVCPH	Carbamidomethyl(C)@15		cleaved H-L@C-term	-0.00507043	1847.94	924.977	1847.95	924.98	2	19	7.1.1.5559.20	73.6454	2422.5	2106.55	72.99	1.04	7327.85
2	18.26	18.26	18.21	tr|Q7DMU0	Storage protein OS=Triticum aestivum OX=4565 GN=Gbl1 PE=4 SV=1; Embryo globulin OS=Hordeum vulgare OX=4513 GN=Beg1 PE=2 SV=1	0	99	LAVVLEGEGEVQIVCPH	Carbamidomethyl(C)@15		cleaved H-L@C-term	0.00519347	1847.95	616.991	1847.95	616.989	3	23	7.1.1.5560.8	73.6903	3906.04	3462.83	74.13	1.14	8462.14
2	18.26	18.26	18.21	tr|Q7DMU0	Storage protein OS=Triticum aestivum OX=4565 GN=Gbl1 PE=4 SV=1; Embryo globulin OS=Hordeum vulgare OX=4513 GN=Beg1 PE=2 SV=1	0	99	LAVVLEGEGEVQIVCPH	Carbamidomethyl(C)@15		cleaved H-L@C-term	0.00519347	1847.95	616.991	1847.95	616.989	3	21	7.1.1.5561.7	73.7809	3906.04	3467.03	74.13	1.14	8425.63
2	18.26	18.26	18.21	tr|Q7DMU0	Storage protein OS=Triticum aestivum OX=4565 GN=Gbl1 PE=4 SV=1; Embryo globulin OS=Hordeum vulgare OX=4513 GN=Beg1 PE=2 SV=1	0	99	LAVVLEGEGEVQIVCPH	Carbamidomethyl(C)@15		cleaved H-L@C-term	0.00519347	1847.95	616.991	1847.95	616.989	3	22	7.1.1.5562.8	73.8802	3906.04	3510.82	74.13	1.14	8777.21
2	18.26	18.26	18.21	tr|Q7DMU0	Storage protein OS=Triticum aestivum OX=4565 GN=Gbl1 PE=4 SV=1; Embryo globulin OS=Hordeum vulgare OX=4513 GN=Beg1 PE=2 SV=1	0	99	LAVVLEGEGEVQIVCPH	Carbamidomethyl(C)@15		cleaved H-L@C-term	0.00519347	1847.95	616.991	1847.95	616.989	3	24	7.1.1.5563.7	73.9708	3906.04	3649.29	74.13	1.14	8727.89
2	18.26	18.26	18.21	tr|Q7DMU0	Storage protein OS=Triticum aestivum OX=4565 GN=Gbl1 PE=4 SV=1; Embryo globulin OS=Hordeum vulgare OX=4513 GN=Beg1 PE=2 SV=1	0	99	LAVVLEGEGEVQIVCPH	Carbamidomethyl(C)@15		cleaved H-L@C-term	0.00519347	1847.95	616.991	1847.95	616.989	3	21	7.1.1.5564.8	74.0699	3906.04	3820.6	74.13	1.14	9105.4
2	18.26	18.26	18.21	tr|Q7DMU0	Storage protein OS=Triticum aestivum OX=4565 GN=Gbl1 PE=4 SV=1; Embryo globulin OS=Hordeum vulgare OX=4513 GN=Beg1 PE=2 SV=1	0	99	LAVVLEGEGEVQIVCPH	Carbamidomethyl(C)@15		cleaved H-L@C-term	0.00519347	1847.95	616.991	1847.95	616.989	3	21	7.1.1.5565.8	74.1648	3906.04	3859.44	74.13	1.14	9242.16
2	18.26	18.26	18.21	tr|Q7DMU0	Storage protein OS=Triticum aestivum OX=4565 GN=Gbl1 PE=4 SV=1; Embryo globulin OS=Hordeum vulgare OX=4513 GN=Beg1 PE=2 SV=1	0	99	LAVVLEGEGEVQIVCPH	Carbamidomethyl(C)@15		cleaved H-L@C-term	0.00519347	1847.95	616.991	1847.95	616.989	3	23	7.1.1.5566.7	74.2556	3906.04	3693.87	74.13	1.14	8829.15
2	18.26	18.26	18.21	tr|Q7DMU0	Storage protein OS=Triticum aestivum OX=4565 GN=Gbl1 PE=4 SV=1; Embryo globulin OS=Hordeum vulgare OX=4513 GN=Beg1 PE=2 SV=1	0	99	LAVVLEGEGEVQIVCPH	Carbamidomethyl(C)@15		cleaved H-L@C-term	0.00519347	1847.95	616.991	1847.95	616.989	3	21	7.1.1.5567.5	74.3421	3906.04	3495.55	74.13	1.14	8535.39
2	18.26	18.26	18.21	tr|Q7DMU0	Storage protein OS=Triticum aestivum OX=4565 GN=Gbl1 PE=4 SV=1; Embryo globulin OS=Hordeum vulgare OX=4513 GN=Beg1 PE=2 SV=1	0	99	LAVVLEGEGEVQIVCPH	Carbamidomethyl(C)@15		cleaved H-L@C-term	0.00519347	1847.95	616.991	1847.95	616.989	3	22	7.1.1.5568.6	74.4411	3906.04	3397.16	74.13	1.14	7933.56
2	18.26	18.26	18.21	tr|Q7DMU0	Storage protein OS=Triticum aestivum OX=4565 GN=Gbl1 PE=4 SV=1; Embryo globulin OS=Hordeum vulgare OX=4513 GN=Beg1 PE=2 SV=1	0	99	LAVVLEGEGEVQIVCPH	Carbamidomethyl(C)@15		cleaved H-L@C-term	0.00519347	1847.95	616.991	1847.95	616.989	3	19	7.1.1.5569.8	74.5443	3906.04	3337.16	74.13	1.14	7592.36
2	18.26	18.26	18.21	tr|Q7DMU0	Storage protein OS=Triticum aestivum OX=4565 GN=Gbl1 PE=4 SV=1; Embryo globulin OS=Hordeum vulgare OX=4513 GN=Beg1 PE=2 SV=1	0	99	LAVVLEGEGEVQIVCPH	Carbamidomethyl(C)@15		cleaved H-L@C-term	0.00592582	1847.95	616.991	1847.95	616.989	3	21	7.1.1.5570.8	74.6392	3622.62	3400.44	75.27	1.23	8091.87
2	18.26	18.26	18.21	tr|Q7DMU0	Storage protein OS=Triticum aestivum OX=4565 GN=Gbl1 PE=4 SV=1; Embryo globulin OS=Hordeum vulgare OX=4513 GN=Beg1 PE=2 SV=1	0	99	LAVVLEGEGEVQIVCPH	Carbamidomethyl(C)@15		cleaved H-L@C-term	0.00592582	1847.95	616.991	1847.95	616.989	3	21	7.1.1.5571.7	74.7299	3622.62	3507.22	75.27	1.23	8284.38
2	18.26	18.26	18.21	tr|Q7DMU0	Storage protein OS=Triticum aestivum OX=4565 GN=Gbl1 PE=4 SV=1; Embryo globulin OS=Hordeum vulgare OX=4513 GN=Beg1 PE=2 SV=1	0	99	LAVVLEGEGEVQIVCPH	Carbamidomethyl(C)@15		cleaved H-L@C-term	0.00592582	1847.95	616.991	1847.95	616.989	3	21	7.1.1.5572.6	74.8205	3622.62	3598.26	75.27	1.23	8714.14
2	18.26	18.26	18.21	tr|Q7DMU0	Storage protein OS=Triticum aestivum OX=4565 GN=Gbl1 PE=4 SV=1; Embryo globulin OS=Hordeum vulgare OX=4513 GN=Beg1 PE=2 SV=1	0	99	LAVVLEGEGEVQIVCPH	Carbamidomethyl(C)@15		cleaved H-L@C-term	0.00592582	1847.95	616.991	1847.95	616.989	3	23	7.1.1.5573.8	74.9239	3622.62	3482.72	75.27	1.23	8626.14
2	18.26	18.26	18.21	tr|Q7DMU0	Storage protein OS=Triticum aestivum OX=4565 GN=Gbl1 PE=4 SV=1; Embryo globulin OS=Hordeum vulgare OX=4513 GN=Beg1 PE=2 SV=1	0	99	LAVVLEGEGEVQIVCPH	Carbamidomethyl(C)@15		cleaved H-L@C-term	0.00592582	1847.95	616.991	1847.95	616.989	3	21	7.1.1.5574.7	75.0145	3622.62	3353.31	75.27	1.23	8620.89
2	18.26	18.26	18.21	tr|Q7DMU0	Storage protein OS=Triticum aestivum OX=4565 GN=Gbl1 PE=4 SV=1; Embryo globulin OS=Hordeum vulgare OX=4513 GN=Beg1 PE=2 SV=1	0	99	LAVVLEGEGEVQIVCPH	Carbamidomethyl(C)@15		cleaved H-L@C-term	0.00592582	1847.95	616.991	1847.95	616.989	3	20	7.1.1.5575.10	75.1215	3622.62	3330.95	75.27	1.23	8367.63
2	18.26	18.26	18.21	tr|Q7DMU0	Storage protein OS=Triticum aestivum OX=4565 GN=Gbl1 PE=4 SV=1; Embryo globulin OS=Hordeum vulgare OX=4513 GN=Beg1 PE=2 SV=1	0	99	LAVVLEGEGEVQIVCPH	Carbamidomethyl(C)@15		cleaved H-L@C-term	0.00592582	1847.95	616.991	1847.95	616.989	3	21	7.1.1.5576.7	75.2038	3622.62	3462.79	75.27	1.23	8340.13
2	18.26	18.26	18.21	tr|Q7DMU0	Storage protein OS=Triticum aestivum OX=4565 GN=Gbl1 PE=4 SV=1; Embryo globulin OS=Hordeum vulgare OX=4513 GN=Beg1 PE=2 SV=1	0	99	LAVVLEGEGEVQIVCPH	Carbamidomethyl(C)@15		cleaved H-L@C-term	0.00592582	1847.95	616.991	1847.95	616.989	3	23	7.1.1.5577.7	75.2985	3622.62	3571.23	75.27	1.23	8238.38
2	18.26	18.26	18.21	tr|Q7DMU0	Storage protein OS=Triticum aestivum OX=4565 GN=Gbl1 PE=4 SV=1; Embryo globulin OS=Hordeum vulgare OX=4513 GN=Beg1 PE=2 SV=1	0	99	LAVVLEGEGEVQIVCPH	Carbamidomethyl(C)@15		cleaved H-L@C-term	0.00592582	1847.95	616.991	1847.95	616.989	3	20	7.1.1.5578.5	75.3852	3622.62	3478.86	75.27	1.23	8227.38
2	18.26	18.26	18.21	tr|Q7DMU0	Storage protein OS=Triticum aestivum OX=4565 GN=Gbl1 PE=4 SV=1; Embryo globulin OS=Hordeum vulgare OX=4513 GN=Beg1 PE=2 SV=1	0	99	LAVVLEGEGEVQIVCPH	Carbamidomethyl(C)@15		cleaved H-L@C-term	0.00592582	1847.95	616.991	1847.95	616.989	3	21	7.1.1.5579.8	75.4923	3622.62	3183.65	75.27	1.23	7973.87
2	18.26	18.26	18.21	tr|Q7DMU0	Storage protein OS=Triticum aestivum OX=4565 GN=Gbl1 PE=4 SV=1; Embryo globulin OS=Hordeum vulgare OX=4513 GN=Beg1 PE=2 SV=1	0	99	LAVVLEGEGEVQIVCPH	Carbamidomethyl(C)@15		cleaved H-L@C-term	0.00354567	1847.95	616.99	1847.95	616.989	3	22	7.1.1.5580.7	75.583	3420.2	2923.11	75.93	1.04	8030.33
2	18.26	18.26	18.21	tr|Q7DMU0	Storage protein OS=Triticum aestivum OX=4565 GN=Gbl1 PE=4 SV=1; Embryo globulin OS=Hordeum vulgare OX=4513 GN=Beg1 PE=2 SV=1	0	99	LAVVLEGEGEVQIVCPH	Carbamidomethyl(C)@15		cleaved H-L@C-term	0.00354567	1847.95	616.99	1847.95	616.989	3	22	7.1.1.5581.8	75.6819	3420.2	3057.26	75.93	1.04	7943.12
2	18.26	18.26	18.21	tr|Q7DMU0	Storage protein OS=Triticum aestivum OX=4565 GN=Gbl1 PE=4 SV=1; Embryo globulin OS=Hordeum vulgare OX=4513 GN=Beg1 PE=2 SV=1	0	99	LAVVLEGEGEVQIVCPH	Carbamidomethyl(C)@15		cleaved H-L@C-term	0.00354567	1847.95	616.99	1847.95	616.989	3	23	7.1.1.5582.8	75.7767	3420.2	3252.27	75.93	1.04	8118.12
2	18.26	18.26	18.21	tr|Q7DMU0	Storage protein OS=Triticum aestivum OX=4565 GN=Gbl1 PE=4 SV=1; Embryo globulin OS=Hordeum vulgare OX=4513 GN=Beg1 PE=2 SV=1	0	99	LAVVLEGEGEVQIVCPH	Carbamidomethyl(C)@15		cleaved H-L@C-term	0.00354567	1847.95	616.99	1847.95	616.989	3	23	7.1.1.5583.8	75.8716	3420.2	3418.42	75.93	1.04	7877.12
2	18.26	18.26	18.21	tr|Q7DMU0	Storage protein OS=Triticum aestivum OX=4565 GN=Gbl1 PE=4 SV=1; Embryo globulin OS=Hordeum vulgare OX=4513 GN=Beg1 PE=2 SV=1	0	99	LAVVLEGEGEVQIVCPH	Carbamidomethyl(C)@15		cleaved H-L@C-term	0.00354567	1847.95	616.99	1847.95	616.989	3	19	7.1.1.5584.6	75.9581	3420.2	3353.55	75.93	1.04	7814.73
2	18.26	18.26	18.21	tr|Q7DMU0	Storage protein OS=Triticum aestivum OX=4565 GN=Gbl1 PE=4 SV=1; Embryo globulin OS=Hordeum vulgare OX=4513 GN=Beg1 PE=2 SV=1	0	99	LAVVLEGEGEVQIVCPH	Carbamidomethyl(C)@15		cleaved H-L@C-term	0.00354567	1847.95	616.99	1847.95	616.989	3	22	7.1.1.5585.5	76.0489	3420.2	3178.36	75.93	1.04	7910.62
2	18.26	18.26	18.21	tr|Q7DMU0	Storage protein OS=Triticum aestivum OX=4565 GN=Gbl1 PE=4 SV=1; Embryo globulin OS=Hordeum vulgare OX=4513 GN=Beg1 PE=2 SV=1	0	99	LAVVLEGEGEVQIVCPH	Carbamidomethyl(C)@15		cleaved H-L@C-term	0.00354567	1847.95	616.99	1847.95	616.989	3	23	7.1.1.5586.9	76.1603	3420.2	3048.99	75.93	1.04	7583.42
2	18.26	18.26	18.21	tr|Q7DMU0	Storage protein OS=Triticum aestivum OX=4565 GN=Gbl1 PE=4 SV=1; Embryo globulin OS=Hordeum vulgare OX=4513 GN=Beg1 PE=2 SV=1	0	99	LAVVLEGEGEVQIVCPH	Carbamidomethyl(C)@15		cleaved H-L@C-term	0.00354567	1847.95	616.99	1847.95	616.989	3	21	7.1.1.5587.10	76.2594	3420.2	2977.88	75.93	1.04	7738.86
2	18.26	18.26	18.21	tr|Q7DMU0	Storage protein OS=Triticum aestivum OX=4565 GN=Gbl1 PE=4 SV=1; Embryo globulin OS=Hordeum vulgare OX=4513 GN=Beg1 PE=2 SV=1	0	99	LAVVLEGEGEVQIVCPH	Carbamidomethyl(C)@15		cleaved H-L@C-term	0.00354567	1847.95	616.99	1847.95	616.989	3	21	7.1.1.5588.8	76.3458	3420.2	2988.46	75.93	1.04	7762.36
2	18.26	18.26	18.21	tr|Q7DMU0	Storage protein OS=Triticum aestivum OX=4565 GN=Gbl1 PE=4 SV=1; Embryo globulin OS=Hordeum vulgare OX=4513 GN=Beg1 PE=2 SV=1	0	99	LAVVLEGEGEVQIVCPH	Carbamidomethyl(C)@15		cleaved H-L@C-term	0.00354567	1847.95	616.99	1847.95	616.989	3	21	7.1.1.5589.7	76.4366	3420.2	2963.13	75.93	1.04	7666.86
2	18.26	18.26	18.21	tr|Q7DMU0	Storage protein OS=Triticum aestivum OX=4565 GN=Gbl1 PE=4 SV=1; Embryo globulin OS=Hordeum vulgare OX=4513 GN=Beg1 PE=2 SV=1	0	99	LAVVLEGEGEVQIVCPH	Carbamidomethyl(C)@15		cleaved H-L@C-term	0.00354567	1847.95	616.99	1847.95	616.989	3	20	7.1.1.5590.7	76.5313	3420.2	2914.45	75.93	1.04	7510.36
2	18.26	18.26	18.21	tr|Q7DMU0	Storage protein OS=Triticum aestivum OX=4565 GN=Gbl1 PE=4 SV=1; Embryo globulin OS=Hordeum vulgare OX=4513 GN=Beg1 PE=2 SV=1	0	99	LAVVLEGEGEVQIVCPH	Deamidated(Q)@12; Carbamidomethyl(C)@15		cleaved H-L@C-term	0.0191953	1848.95	617.323	1848.93	617.317	3	19	7.1.1.5601.9	77.5835	1598.03	1401.91	76.5	1.42	7068.84
2	18.26	18.26	18.21	tr|Q7DMU0	Storage protein OS=Triticum aestivum OX=4565 GN=Gbl1 PE=4 SV=1; Embryo globulin OS=Hordeum vulgare OX=4513 GN=Beg1 PE=2 SV=1	0	99	LAVVLEGEGEVQIVCPH	Carbamidomethyl(C)@15		cleaved H-L@C-term	0.122466	1848.07	925.041	1847.95	924.98	2	21	6.1.1.5616.19	57.6843	12967.9	12377.8	56.84	1.99	31322.1
2	18.26	18.26	18.21	tr|Q7DMU0	Storage protein OS=Triticum aestivum OX=4565 GN=Gbl1 PE=4 SV=1; Embryo globulin OS=Hordeum vulgare OX=4513 GN=Beg1 PE=2 SV=1	0	99	LAVVLEGEGEVQIVCPH	Carbamidomethyl(C)@15		cleaved H-L@C-term	0.0993204	1848.04	617.022	1847.95	616.989	3	20	6.1.1.5619.6	57.9143	17948.8	14835.5	58.55	2.84	26548.7
2	18.26	18.26	18.21	tr|Q7DMU0	Storage protein OS=Triticum aestivum OX=4565 GN=Gbl1 PE=4 SV=1; Embryo globulin OS=Hordeum vulgare OX=4513 GN=Beg1 PE=2 SV=1	0	99	LAVVLEGEGEVQIVCPH	Carbamidomethyl(C)@15		cleaved H-L@C-term	0.0993204	1848.04	617.022	1847.95	616.989	3	21	6.1.1.5620.6	58.0091	17948.8	15482.8	58.55	2.84	29016.8
2	18.26	18.26	18.21	tr|Q7DMU0	Storage protein OS=Triticum aestivum OX=4565 GN=Gbl1 PE=4 SV=1; Embryo globulin OS=Hordeum vulgare OX=4513 GN=Beg1 PE=2 SV=1	0	99	LAVVLEGEGEVQIVCPH	Carbamidomethyl(C)@15		cleaved H-L@C-term	0.0993204	1848.04	617.022	1847.95	616.989	3	23	6.1.1.5621.6	58.1038	17948.8	16270.9	58.55	2.84	30792.3
2	18.26	18.26	18.21	tr|Q7DMU0	Storage protein OS=Triticum aestivum OX=4565 GN=Gbl1 PE=4 SV=1; Embryo globulin OS=Hordeum vulgare OX=4513 GN=Beg1 PE=2 SV=1	0	99	LAVVLEGEGEVQIVCPH	Carbamidomethyl(C)@15		cleaved H-L@C-term	0.0993204	1848.04	617.022	1847.95	616.989	3	22	6.1.1.5622.8	58.2071	17948.8	17129.5	58.55	2.84	32694.6
2	18.26	18.26	18.21	tr|Q7DMU0	Storage protein OS=Triticum aestivum OX=4565 GN=Gbl1 PE=4 SV=1; Embryo globulin OS=Hordeum vulgare OX=4513 GN=Beg1 PE=2 SV=1	0	99	LAVVLEGEGEVQIVCPH	Carbamidomethyl(C)@15		cleaved H-L@C-term	0.0993204	1848.04	617.022	1847.95	616.989	3	22	6.1.1.5628.4	58.7588	17948.8	16909.5	58.55	2.84	34221.7
2	18.26	18.26	18.21	tr|Q7DMU0	Storage protein OS=Triticum aestivum OX=4565 GN=Gbl1 PE=4 SV=1; Embryo globulin OS=Hordeum vulgare OX=4513 GN=Beg1 PE=2 SV=1	0	99	LAVVLEGEGEVQIVCPH	Carbamidomethyl(C)@15		cleaved H-L@C-term	0.0993204	1848.04	617.022	1847.95	616.989	3	22	6.1.1.5630.5	58.9526	17948.8	15645.2	58.55	2.84	32732.1
2	18.26	18.26	18.21	tr|Q7DMU0	Storage protein OS=Triticum aestivum OX=4565 GN=Gbl1 PE=4 SV=1; Embryo globulin OS=Hordeum vulgare OX=4513 GN=Beg1 PE=2 SV=1	0	99	LAVVLEGEGEVQIVCPH	Carbamidomethyl(C)@15		cleaved H-L@C-term	0.0993204	1848.04	617.022	1847.95	616.989	3	22	6.1.1.5632.4	59.138	17948.8	14341.2	58.55	2.84	26841.7
2	18.26	18.26	18.21	tr|Q7DMU0	Storage protein OS=Triticum aestivum OX=4565 GN=Gbl1 PE=4 SV=1; Embryo globulin OS=Hordeum vulgare OX=4513 GN=Beg1 PE=2 SV=1	0	99	LAVVLEGEGEVQIVCPH	Carbamidomethyl(C)@15		cleaved H-L@C-term	0.0993204	1848.04	617.022	1847.95	616.989	3	21	6.1.1.5633.4	59.2328	17948.8	14070.2	58.55	2.84	25980.2
2	18.26	18.26	18.21	tr|Q7DMU0	Storage protein OS=Triticum aestivum OX=4565 GN=Gbl1 PE=4 SV=1; Embryo globulin OS=Hordeum vulgare OX=4513 GN=Beg1 PE=2 SV=1	0	99	LAVVLEGEGEVQIVCPH	Carbamidomethyl(C)@15		cleaved H-L@C-term	0.0993204	1848.04	617.022	1847.95	616.989	3	22	6.1.1.5634.5	59.3319	17948.8	13786.9	58.55	2.84	24369.4
2	18.26	18.26	18.21	tr|Q7DMU0	Storage protein OS=Triticum aestivum OX=4565 GN=Gbl1 PE=4 SV=1; Embryo globulin OS=Hordeum vulgare OX=4513 GN=Beg1 PE=2 SV=1	0	99	LAVVLEGEGEVQIVCPH	Carbamidomethyl(C)@15		cleaved H-L@C-term	0.0993204	1848.04	617.022	1847.95	616.989	3	23	6.1.1.5635.5	59.4267	17948.8	13489	58.55	2.84	25957.9
2	18.26	18.26	18.21	tr|Q7DMU0	Storage protein OS=Triticum aestivum OX=4565 GN=Gbl1 PE=4 SV=1; Embryo globulin OS=Hordeum vulgare OX=4513 GN=Beg1 PE=2 SV=1	0	99	LAVVLEGEGEVQIVCPH	Carbamidomethyl(C)@15		cleaved H-L@C-term	0.0993204	1848.04	617.022	1847.95	616.989	3	23	6.1.1.5636.6	59.5257	17948.8	13090.9	58.55	2.84	27045.7
2	18.26	18.26	18.21	tr|Q7DMU0	Storage protein OS=Triticum aestivum OX=4565 GN=Gbl1 PE=4 SV=1; Embryo globulin OS=Hordeum vulgare OX=4513 GN=Beg1 PE=2 SV=1	0	99	LAVVLEGEGEVQIVCPH	Carbamidomethyl(C)@15		cleaved H-L@C-term	0.0993204	1848.04	617.022	1847.95	616.989	3	21	6.1.1.5637.3	59.6079	17948.8	12759.8	58.55	2.84	28216.2
2	18.26	18.26	18.21	tr|Q7DMU0	Storage protein OS=Triticum aestivum OX=4565 GN=Gbl1 PE=4 SV=1; Embryo globulin OS=Hordeum vulgare OX=4513 GN=Beg1 PE=2 SV=1	0	99	LAVVLEGEGEVQIVCPH	Carbamidomethyl(C)@15		cleaved H-L@C-term	0.0993204	1848.04	617.022	1847.95	616.989	3	23	6.1.1.5639.4	59.8017	17948.8	12257.8	58.55	2.84	24763.1
2	18.26	18.26	18.21	tr|Q7DMU0	Storage protein OS=Triticum aestivum OX=4565 GN=Gbl1 PE=4 SV=1; Embryo globulin OS=Hordeum vulgare OX=4513 GN=Beg1 PE=2 SV=1	0	99	LAVVLEGEGEVQIVCPH	Carbamidomethyl(C)@15		cleaved H-L@C-term	0.0993204	1848.04	617.022	1847.95	616.989	3	21	6.1.1.5640.4	59.8964	17948.8	12107.9	58.55	2.84	23774.4
2	18.26	18.26	18.21	tr|Q7DMU0	Storage protein OS=Triticum aestivum OX=4565 GN=Gbl1 PE=4 SV=1; Embryo globulin OS=Hordeum vulgare OX=4513 GN=Beg1 PE=2 SV=1	0	99	LAVVLEGEGEVQIVCPH	Carbamidomethyl(C)@15		cleaved H-L@C-term	0.0993204	1848.04	617.022	1847.95	616.989	3	21	6.1.1.5641.4	59.9913	17948.8	11878.2	58.55	2.84	23715.3
2	18.26	18.26	18.21	tr|Q7DMU0	Storage protein OS=Triticum aestivum OX=4565 GN=Gbl1 PE=4 SV=1; Embryo globulin OS=Hordeum vulgare OX=4513 GN=Beg1 PE=2 SV=1	0	99	LAVVLEGEGEVQIVCPH	Carbamidomethyl(C)@15		cleaved H-L@C-term	0.0993204	1848.04	617.022	1847.95	616.989	3	21	6.1.1.5642.4	60.0866	17948.8	11323.7	58.55	2.84	25491.2
2	18.26	18.26	18.21	tr|Q7DMU0	Storage protein OS=Triticum aestivum OX=4565 GN=Gbl1 PE=4 SV=1; Embryo globulin OS=Hordeum vulgare OX=4513 GN=Beg1 PE=2 SV=1	0	99	LAVVLEGEGEVQIVCPH	Carbamidomethyl(C)@15		cleaved H-L@C-term	0.0993204	1848.04	617.022	1847.95	616.989	3	22	6.1.1.5644.4	60.2763	17948.8	10250.7	58.55	2.84	26923.7
2	18.26	18.26	18.21	tr|Q7DMU0	Storage protein OS=Triticum aestivum OX=4565 GN=Gbl1 PE=4 SV=1; Embryo globulin OS=Hordeum vulgare OX=4513 GN=Beg1 PE=2 SV=1	0	99	LAVVLEGEGEVQIVCPH	Carbamidomethyl(C)@15		cleaved H-L@C-term	0.0993204	1848.04	617.022	1847.95	616.989	3	20	6.1.1.5647.6	60.5682	17948.8	8999.26	58.55	2.84	17993.9
2	18.26	18.26	18.21	tr|Q7DMU0	Storage protein OS=Triticum aestivum OX=4565 GN=Gbl1 PE=4 SV=1; Embryo globulin OS=Hordeum vulgare OX=4513 GN=Beg1 PE=2 SV=1	0	99	LAVVLEGEGEVQIVCPH	Carbamidomethyl(C)@15		cleaved H-L@C-term	0.0993204	1848.04	617.022	1847.95	616.989	3	21	6.1.1.5648.7	60.6673	17948.8	8405.04	58.55	2.84	16678.6
2	18.26	18.26	18.21	tr|Q7DMU0	Storage protein OS=Triticum aestivum OX=4565 GN=Gbl1 PE=4 SV=1; Embryo globulin OS=Hordeum vulgare OX=4513 GN=Beg1 PE=2 SV=1	0	99	LAVVLEGEGEVQIVCPH	Carbamidomethyl(C)@15		cleaved H-L@C-term	0.0993204	1848.04	617.022	1847.95	616.989	3	22	6.1.1.5649.6	60.7578	17948.8	7862.66	58.55	2.84	16551.6
2	18.26	18.26	18.21	tr|Q7DMU0	Storage protein OS=Triticum aestivum OX=4565 GN=Gbl1 PE=4 SV=1; Embryo globulin OS=Hordeum vulgare OX=4513 GN=Beg1 PE=2 SV=1	0	99	LAVVLEGEGEVQIVCPH	Carbamidomethyl(C)@15		cleaved H-L@C-term	0.0993204	1848.04	617.022	1847.95	616.989	3	19	6.1.1.5650.8	60.861	17948.8	7400	58.55	2.84	16948.9
2	18.26	18.26	18.21	tr|Q7DMU0	Storage protein OS=Triticum aestivum OX=4565 GN=Gbl1 PE=4 SV=1; Embryo globulin OS=Hordeum vulgare OX=4513 GN=Beg1 PE=2 SV=1	0	99	LAVVLEGEGEVQIVCPH	Carbamidomethyl(C)@15		cleaved H-L@C-term	0.0993204	1848.04	617.022	1847.95	616.989	3	21	6.1.1.5651.7	60.9515	17948.8	7256.51	58.55	2.84	16647.6
2	18.26	18.26	18.21	tr|Q7DMU0	Storage protein OS=Triticum aestivum OX=4565 GN=Gbl1 PE=4 SV=1; Embryo globulin OS=Hordeum vulgare OX=4513 GN=Beg1 PE=2 SV=1	0	99	LAVVLEGEGEVQIVCPH	Carbamidomethyl(C)@15		cleaved H-L@C-term	0.0993204	1848.04	617.022	1847.95	616.989	3	21	6.1.1.5652.6	61.0418	17948.8	7113.32	58.55	2.84	16381.4
2	18.26	18.26	18.21	tr|Q7DMU0	Storage protein OS=Triticum aestivum OX=4565 GN=Gbl1 PE=4 SV=1; Embryo globulin OS=Hordeum vulgare OX=4513 GN=Beg1 PE=2 SV=1	0	99	LAVVLEGEGEVQIVCPH	Carbamidomethyl(C)@15		cleaved H-L@C-term	0.0993204	1848.04	617.022	1847.95	616.989	3	20	6.1.1.5653.6	61.1362	17948.8	6980.48	58.55	2.84	16896.6
2	18.26	18.26	18.21	tr|Q7DMU0	Storage protein OS=Triticum aestivum OX=4565 GN=Gbl1 PE=4 SV=1; Embryo globulin OS=Hordeum vulgare OX=4513 GN=Beg1 PE=2 SV=1	0	99	LAVVLEGEGEVQIVCPH	Carbamidomethyl(C)@15		cleaved H-L@C-term	0.0993204	1848.04	617.022	1847.95	616.989	3	20	6.1.1.5654.4	61.2225	17948.8	6897.93	58.55	2.84	16510.4
2	18.26	18.26	18.21	tr|Q7DMU0	Storage protein OS=Triticum aestivum OX=4565 GN=Gbl1 PE=4 SV=1; Embryo globulin OS=Hordeum vulgare OX=4513 GN=Beg1 PE=2 SV=1	0	99	LAVVLEGEGEVQIVCPH	Carbamidomethyl(C)@15		cleaved H-L@C-term	0.0993204	1848.04	617.022	1847.95	616.989	3	20	6.1.1.5655.6	61.3256	17948.8	6799.4	58.55	2.84	17699.2
2	18.26	18.26	18.21	tr|Q7DMU0	Storage protein OS=Triticum aestivum OX=4565 GN=Gbl1 PE=4 SV=1; Embryo globulin OS=Hordeum vulgare OX=4513 GN=Beg1 PE=2 SV=1	0	99	LAVVLEGEGEVQIVCPH	Carbamidomethyl(C)@15		cleaved H-L@C-term	0.0993204	1848.04	617.022	1847.95	616.989	3	22	6.1.1.5656.6	61.4204	17948.8	6587.91	58.55	2.84	19355
2	18.26	18.26	18.21	tr|Q7DMU0	Storage protein OS=Triticum aestivum OX=4565 GN=Gbl1 PE=4 SV=1; Embryo globulin OS=Hordeum vulgare OX=4513 GN=Beg1 PE=2 SV=1	0	99	LAVVLEGEGEVQIVCPH	Carbamidomethyl(C)@15		cleaved H-L@C-term	0.0993204	1848.04	617.022	1847.95	616.989	3	19	6.1.1.5660.4	61.7882	17948.8	5021.41	58.55	2.84	19709.2
2	18.26	18.26	18.21	tr|Q7DMU0	Storage protein OS=Triticum aestivum OX=4565 GN=Gbl1 PE=4 SV=1; Embryo globulin OS=Hordeum vulgare OX=4513 GN=Beg1 PE=2 SV=1	0	99	LAVVLEGEGEVQIVCPH	Carbamidomethyl(C)@15		cleaved H-L@C-term	0.0993204	1848.04	617.022	1847.95	616.989	3	21	6.1.1.5661.6	61.8907	17948.8	4850.91	58.55	2.84	18737.7
2	18.26	18.26	18.21	tr|Q7DMU0	Storage protein OS=Triticum aestivum OX=4565 GN=Gbl1 PE=4 SV=1; Embryo globulin OS=Hordeum vulgare OX=4513 GN=Beg1 PE=2 SV=1	0	99	LAVVLEGEGEVQIVCPH	Carbamidomethyl(C)@15		cleaved H-L@C-term	0.100602	1848.05	617.023	1847.95	616.989	3	21	7.1.1.5421.3	60.5138	13506.4	13054.3	60.4	1.14	26944.2
2	18.26	18.26	18.21	tr|Q7DMU0	Storage protein OS=Triticum aestivum OX=4565 GN=Gbl1 PE=4 SV=1; Embryo globulin OS=Hordeum vulgare OX=4513 GN=Beg1 PE=2 SV=1	0	99	LAVVLEGEGEVQIVCPH	Carbamidomethyl(C)@15; Carbamidomethyl(H)@17		cleaved H-L@C-term	0.00106409	1904.97	635.996	1904.97	635.996	3	15	7.1.1.5557.8	73.4056	1061.98	866.8	74.32	1.8	4391.26
2	18.26	18.26	18.21	tr|Q7DMU0	Storage protein OS=Triticum aestivum OX=4565 GN=Gbl1 PE=4 SV=1; Embryo globulin OS=Hordeum vulgare OX=4513 GN=Beg1 PE=2 SV=1	0	99	LAVVLEGEGEVQIVCPH	Carbamidomethyl(C)@15		cleaved H-L@C-term	0.121367	1848.07	925.04	1847.95	924.98	2	21	6.1.1.5618.17	57.8655	16404.4	13418.4	58.55	3.41	26895.1
2	18.26	18.26	18.21	tr|Q7DMU0	Storage protein OS=Triticum aestivum OX=4565 GN=Gbl1 PE=4 SV=1; Embryo globulin OS=Hordeum vulgare OX=4513 GN=Beg1 PE=2 SV=1	0	99	LAVVLEGEGEVQIVCPH	Carbamidomethyl(C)@15		cleaved H-L@C-term	0.0993204	1848.04	617.022	1847.95	616.989	3	20	6.1.1.5631.3	59.0391	17948.8	14996.1	58.55	2.84	29633.8
2	18.26	18.26	18.21	tr|Q7DMU0	Storage protein OS=Triticum aestivum OX=4565 GN=Gbl1 PE=4 SV=1; Embryo globulin OS=Hordeum vulgare OX=4513 GN=Beg1 PE=2 SV=1	0	99	LAVVLEGEGEVQIVCPH	Carbamidomethyl(C)@15		cleaved H-L@C-term	0.122466	1848.07	925.041	1847.95	924.98	2	21	6.1.1.5602.21	56.3669	12967.9	11515.1	56.84	1.99	34082.7
2	18.26	18.26	18.21	tr|Q7DMU0	Storage protein OS=Triticum aestivum OX=4565 GN=Gbl1 PE=4 SV=1; Embryo globulin OS=Hordeum vulgare OX=4513 GN=Beg1 PE=2 SV=1	0	99	LAVVLEGEGEVQIVCPH	Carbamidomethyl(C)@15		cleaved H-L@C-term	0.121367	1848.07	925.04	1847.95	924.98	2	21	6.1.1.5617.18	57.7748	16404.4	12843.3	58.55	3.41	28929.6
2	18.26	18.26	18.21	tr|Q7DMU0	Storage protein OS=Triticum aestivum OX=4565 GN=Gbl1 PE=4 SV=1; Embryo globulin OS=Hordeum vulgare OX=4513 GN=Beg1 PE=2 SV=1	0	99	LAVVLEGEGEVQIVCPH	Carbamidomethyl(C)@15		cleaved H-L@C-term	0.00528113	1847.95	924.982	1847.95	924.98	2	17	6.1.1.5725.21	67.9999	2258.64	2244.51	68.19	1.7	9372.91
2	18.26	18.26	18.21	tr|Q7DMU0	Storage protein OS=Triticum aestivum OX=4565 GN=Gbl1 PE=4 SV=1; Embryo globulin OS=Hordeum vulgare OX=4513 GN=Beg1 PE=2 SV=1	0	99	LAVVLEGEGEVQIVCPH	Carbamidomethyl(C)@15		cleaved H-L@C-term	0.00217524	1847.95	616.99	1847.95	616.989	3	21	6.1.1.5746.7	69.9299	46.2854	46.2854			9596.17
2	18.26	18.26	18.21	tr|Q7DMU0	Storage protein OS=Triticum aestivum OX=4565 GN=Gbl1 PE=4 SV=1; Embryo globulin OS=Hordeum vulgare OX=4513 GN=Beg1 PE=2 SV=1	0	99	LAVVLEGEGEVQIVCPH	Carbamidomethyl(C)@15		cleaved H-L@C-term	-0.00441609	1847.94	616.987	1847.95	616.989	3	24	6.1.1.5747.7	70.0246	50.3808	50.3808			9696.92
2	18.26	18.26	18.21	tr|Q7DMU0	Storage protein OS=Triticum aestivum OX=4565 GN=Gbl1 PE=4 SV=1; Embryo globulin OS=Hordeum vulgare OX=4513 GN=Beg1 PE=2 SV=1	0	99	LAVVLEGEGEVQIVCPH	Carbamidomethyl(C)@15		cleaved H-L@C-term	-0.00533156	1847.94	616.987	1847.95	616.989	3	22	6.1.1.5748.7	70.1196	46.7994	46.7994			10283.9
2	18.26	18.26	18.21	tr|Q7DMU0	Storage protein OS=Triticum aestivum OX=4565 GN=Gbl1 PE=4 SV=1; Embryo globulin OS=Hordeum vulgare OX=4513 GN=Beg1 PE=2 SV=1	0	99	LAVVLEGEGEVQIVCPH	Carbamidomethyl(C)@15		cleaved H-L@C-term	0.000161218	1847.95	616.989	1847.95	616.989	3	20	6.1.1.5749.6	70.2099	52.5012	52.5012			9800.68
2	18.26	18.26	18.21	tr|Q7DMU0	Storage protein OS=Triticum aestivum OX=4565 GN=Gbl1 PE=4 SV=1; Embryo globulin OS=Hordeum vulgare OX=4513 GN=Beg1 PE=2 SV=1	0	99	LAVVLEGEGEVQIVCPH	Carbamidomethyl(C)@15		cleaved H-L@C-term	0.00107668	1847.95	616.989	1847.95	616.989	3	21	6.1.1.5750.5	70.3005	48.0831	48.0831			9968.18
2	18.26	18.26	18.21	tr|Q7DMU0	Storage protein OS=Triticum aestivum OX=4565 GN=Gbl1 PE=4 SV=1; Embryo globulin OS=Hordeum vulgare OX=4513 GN=Beg1 PE=2 SV=1	0	99	LAVVLEGEGEVQIVCPH	Carbamidomethyl(C)@15		cleaved H-L@C-term	-0.00295135	1847.94	616.988	1847.95	616.989	3	22	6.1.1.5751.6	70.3995	49.0165	49.0165			9799.93
2	18.26	18.26	18.21	tr|Q7DMU0	Storage protein OS=Triticum aestivum OX=4565 GN=Gbl1 PE=4 SV=1; Embryo globulin OS=Hordeum vulgare OX=4513 GN=Beg1 PE=2 SV=1	0	99	LAVVLEGEGEVQIVCPH	Carbamidomethyl(C)@15		cleaved H-L@C-term	-0.0104581	1847.93	616.986	1847.95	616.989	3	22	6.1.1.5752.7	70.4983	49.5715	49.5715			10105.2
2	18.26	18.26	18.21	tr|Q7DMU0	Storage protein OS=Triticum aestivum OX=4565 GN=Gbl1 PE=4 SV=1; Embryo globulin OS=Hordeum vulgare OX=4513 GN=Beg1 PE=2 SV=1	0	99	LAVVLEGEGEVQIVCPH	Carbamidomethyl(C)@15		cleaved H-L@C-term	-0.00734557	1847.94	616.986	1847.95	616.989	3	21	6.1.1.5753.8	70.5976	47.3613	47.3613			9564.67
2	18.26	18.26	18.21	tr|Q7DMU0	Storage protein OS=Triticum aestivum OX=4565 GN=Gbl1 PE=4 SV=1; Embryo globulin OS=Hordeum vulgare OX=4513 GN=Beg1 PE=2 SV=1	0	99	LAVVLEGEGEVQIVCPH	Carbamidomethyl(C)@15		cleaved H-L@C-term	-0.00112043	1847.94	616.989	1847.95	616.989	3	24	6.1.1.5754.6	70.6838	54.8154	54.8154			9567.17
2	18.26	18.26	18.21	tr|Q7DMU0	Storage protein OS=Triticum aestivum OX=4565 GN=Gbl1 PE=4 SV=1; Embryo globulin OS=Hordeum vulgare OX=4513 GN=Beg1 PE=2 SV=1	0	99	LAVVLEGEGEVQIVCPH	Carbamidomethyl(C)@15		cleaved H-L@C-term	-0.00734557	1847.94	616.986	1847.95	616.989	3	21	6.1.1.5755.6	70.7783	53.1531	53.1531			9314.91
2	18.26	18.26	18.21	tr|Q7DMU0	Storage protein OS=Triticum aestivum OX=4565 GN=Gbl1 PE=4 SV=1; Embryo globulin OS=Hordeum vulgare OX=4513 GN=Beg1 PE=2 SV=1	0	99	LAVVLEGEGEVQIVCPH	Carbamidomethyl(C)@15		cleaved H-L@C-term	-0.000571152	1847.94	616.989	1847.95	616.989	3	19	6.1.1.5756.7	70.877	48.7992	48.7992			9164.41
2	18.26	18.26	18.21	tr|Q7DMU0	Storage protein OS=Triticum aestivum OX=4565 GN=Gbl1 PE=4 SV=1; Embryo globulin OS=Hordeum vulgare OX=4513 GN=Beg1 PE=2 SV=1	0	99	LAVVLEGEGEVQIVCPH	Carbamidomethyl(C)@15		cleaved H-L@C-term	-0.00826104	1847.94	616.986	1847.95	616.989	3	23	6.1.1.5757.7	70.9717	47.7507	47.7507			9130.91
2	18.26	18.26	18.21	tr|Q7DMU0	Storage protein OS=Triticum aestivum OX=4565 GN=Gbl1 PE=4 SV=1; Embryo globulin OS=Hordeum vulgare OX=4513 GN=Beg1 PE=2 SV=1	0	99	LAVVLEGEGEVQIVCPH	Carbamidomethyl(C)@15		cleaved H-L@C-term	-0.0067963	1847.94	616.987	1847.95	616.989	3	23	6.1.1.5758.6	71.0624	43.9008	43.9008			9023.4
2	18.26	18.26	18.21	tr|Q7DMU0	Storage protein OS=Triticum aestivum OX=4565 GN=Gbl1 PE=4 SV=1; Embryo globulin OS=Hordeum vulgare OX=4513 GN=Beg1 PE=2 SV=1	0	99	LAVVLEGEGEVQIVCPH	Carbamidomethyl(C)@15		cleaved H-L@C-term	-0.00459919	1847.94	616.987	1847.95	616.989	3	21	6.1.1.5759.5	71.1531	47.301	47.301			8729.39
2	18.26	18.26	18.21	tr|Q7DMU0	Storage protein OS=Triticum aestivum OX=4565 GN=Gbl1 PE=4 SV=1; Embryo globulin OS=Hordeum vulgare OX=4513 GN=Beg1 PE=2 SV=1	0	99	LAVVLEGEGEVQIVCPH	Carbamidomethyl(C)@15		cleaved H-L@C-term	0.00199214	1847.95	616.99	1847.95	616.989	3	21	6.1.1.5760.6	71.2519	44.8573	44.8573			8735.39
2	18.26	18.26	18.21	tr|Q7DMU0	Storage protein OS=Triticum aestivum OX=4565 GN=Gbl1 PE=4 SV=1; Embryo globulin OS=Hordeum vulgare OX=4513 GN=Beg1 PE=2 SV=1	0	99	LAVVLEGEGEVQIVCPH	Carbamidomethyl(C)@15		cleaved H-L@C-term	-0.000571152	1847.94	616.989	1847.95	616.989	3	20	6.1.1.5761.6	71.3467	42.5491	42.5491			8663.39
2	18.26	18.26	18.21	tr|Q7DMU0	Storage protein OS=Triticum aestivum OX=4565 GN=Gbl1 PE=4 SV=1; Embryo globulin OS=Hordeum vulgare OX=4513 GN=Beg1 PE=2 SV=1	0	99	LAVVLEGEGEVQIVCPH	Carbamidomethyl(C)@15		cleaved H-L@C-term	-0.00166971	1847.94	616.988	1847.95	616.989	3	19	6.1.1.5762.7	71.4455	41.809	41.809			8992.4
2	18.26	18.26	18.21	tr|Q7DMU0	Storage protein OS=Triticum aestivum OX=4565 GN=Gbl1 PE=4 SV=1; Embryo globulin OS=Hordeum vulgare OX=4513 GN=Beg1 PE=2 SV=1	0	99	LAVVLEGEGEVQIVCPH	Carbamidomethyl(C)@15		cleaved H-L@C-term	-0.00459919	1847.94	616.987	1847.95	616.989	3	19	6.1.1.5763.5	71.532	39.528	39.528			9141.16
2	18.26	18.26	18.21	tr|Q7DMU0	Storage protein OS=Triticum aestivum OX=4565 GN=Gbl1 PE=4 SV=1; Embryo globulin OS=Hordeum vulgare OX=4513 GN=Beg1 PE=2 SV=1	0	99	LAVVLEGEGEVQIVCPH	Carbamidomethyl(C)@15		cleaved H-L@C-term	-0.00404991	1847.94	616.988	1847.95	616.989	3	21	6.1.1.5764.7	71.6351	40.7628	40.7628			8771.64
2	18.26	18.26	18.21	tr|Q7DMU0	Storage protein OS=Triticum aestivum OX=4565 GN=Gbl1 PE=4 SV=1; Embryo globulin OS=Hordeum vulgare OX=4513 GN=Beg1 PE=2 SV=1	0	99	LAVVLEGEGEVQIVCPH	Carbamidomethyl(C)@15		cleaved H-L@C-term	0.000710496	1847.95	616.989	1847.95	616.989	3	22	6.1.1.5765.8	71.7341	41.4606	41.4606			9090.15
2	18.26	18.26	18.21	tr|Q7DMU0	Storage protein OS=Triticum aestivum OX=4565 GN=Gbl1 PE=4 SV=1; Embryo globulin OS=Hordeum vulgare OX=4513 GN=Beg1 PE=2 SV=1	0	99	LAVVLEGEGEVQIVCPH	Carbamidomethyl(C)@15		cleaved H-L@C-term	-0.00221898	1847.94	616.988	1847.95	616.989	3	23	6.1.1.5766.7	71.825	38.2978	38.2978			8760.89
2	18.26	18.26	18.21	tr|Q7DMU0	Storage protein OS=Triticum aestivum OX=4565 GN=Gbl1 PE=4 SV=1; Embryo globulin OS=Hordeum vulgare OX=4513 GN=Beg1 PE=2 SV=1	0	99	LAVVLEGEGEVQIVCPH	Carbamidomethyl(C)@15		cleaved H-L@C-term	0.000710496	1847.95	616.989	1847.95	616.989	3	20	6.1.1.5767.8	71.9238	40.8828	40.8828			8686.89
2	18.26	18.26	18.21	tr|Q7DMU0	Storage protein OS=Triticum aestivum OX=4565 GN=Gbl1 PE=4 SV=1; Embryo globulin OS=Hordeum vulgare OX=4513 GN=Beg1 PE=2 SV=1	0	99	LAVVLEGEGEVQIVCPH	Carbamidomethyl(C)@15		cleaved H-L@C-term	0.000710496	1847.95	616.989	1847.95	616.989	3	23	6.1.1.5768.8	72.0185	38.7084	38.7084			8826.4
2	18.26	18.26	18.21	tr|Q7DMU0	Storage protein OS=Triticum aestivum OX=4565 GN=Gbl1 PE=4 SV=1; Embryo globulin OS=Hordeum vulgare OX=4513 GN=Beg1 PE=2 SV=1	0	99	LAVVLEGEGEVQIVCPH	Carbamidomethyl(C)@15		cleaved H-L@C-term	-0.00862722	1847.94	616.986	1847.95	616.989	3	22	6.1.1.5769.5	72.1008	37.5531	37.5531			8971.15
2	18.26	18.26	18.21	tr|Q7DMU0	Storage protein OS=Triticum aestivum OX=4565 GN=Gbl1 PE=4 SV=1; Embryo globulin OS=Hordeum vulgare OX=4513 GN=Beg1 PE=2 SV=1	0	99	LAVVLEGEGEVQIVCPH	Carbamidomethyl(C)@15		cleaved H-L@C-term	-0.00295135	1847.94	616.988	1847.95	616.989	3	20	6.1.1.5770.6	72.2001	37.4122	37.4122			8829.89
2	18.26	18.26	18.21	tr|Q7DMU0	Storage protein OS=Triticum aestivum OX=4565 GN=Gbl1 PE=4 SV=1; Embryo globulin OS=Hordeum vulgare OX=4513 GN=Beg1 PE=2 SV=1	0	99	LAVVLEGEGEVQIVCPH	Carbamidomethyl(C)@15		cleaved H-L@C-term	0.00162596	1847.95	616.99	1847.95	616.989	3	21	6.1.1.5771.8	72.3035	40.1888	40.1888			8842.4
2	18.26	18.26	18.21	tr|Q7DMU0	Storage protein OS=Triticum aestivum OX=4565 GN=Gbl1 PE=4 SV=1; Embryo globulin OS=Hordeum vulgare OX=4513 GN=Beg1 PE=2 SV=1	0	99	LAVVLEGEGEVQIVCPH	Carbamidomethyl(C)@15		cleaved H-L@C-term	-0.00166971	1847.94	616.988	1847.95	616.989	3	22	6.1.1.5772.6	72.39	41.5836	41.5836			8840.15
2	18.26	18.26	18.21	tr|Q7DMU0	Storage protein OS=Triticum aestivum OX=4565 GN=Gbl1 PE=4 SV=1; Embryo globulin OS=Hordeum vulgare OX=4513 GN=Beg1 PE=2 SV=1	0	99	LAVVLEGEGEVQIVCPH	Carbamidomethyl(C)@15		cleaved H-L@C-term	-0.00972578	1847.94	616.986	1847.95	616.989	3	22	6.1.1.5773.6	72.4848	39.5101	39.5101			8777.9
2	18.26	18.26	18.21	tr|Q7DMU0	Storage protein OS=Triticum aestivum OX=4565 GN=Gbl1 PE=4 SV=1; Embryo globulin OS=Hordeum vulgare OX=4513 GN=Beg1 PE=2 SV=1	0	99	LAVVLEGEGEVQIVCPH	Carbamidomethyl(C)@15		cleaved H-L@C-term	-0.00350063	1847.94	616.988	1847.95	616.989	3	20	6.1.1.5774.6	72.5796	40.4427	40.4427			8682.39
2	18.26	18.26	18.21	tr|Q7DMU0	Storage protein OS=Triticum aestivum OX=4565 GN=Gbl1 PE=4 SV=1; Embryo globulin OS=Hordeum vulgare OX=4513 GN=Beg1 PE=2 SV=1	0	99	LAVVLEGEGEVQIVCPH	Carbamidomethyl(C)@15		cleaved H-L@C-term	-0.00295135	1847.94	616.988	1847.95	616.989	3	21	6.1.1.5775.6	72.6744	37.7934	37.7934			8346.88
2	18.26	18.26	18.21	tr|Q7DMU0	Storage protein OS=Triticum aestivum OX=4565 GN=Gbl1 PE=4 SV=1; Embryo globulin OS=Hordeum vulgare OX=4513 GN=Beg1 PE=2 SV=1	0	99	LAVVLEGEGEVQIVCPH	Carbamidomethyl(C)@15		cleaved H-L@C-term	-0.00789485	1847.94	616.986	1847.95	616.989	3	23	6.1.1.5776.7	72.7735	38.1971	38.1971			8051.87
2	18.26	18.26	18.21	tr|Q7DMU0	Storage protein OS=Triticum aestivum OX=4565 GN=Gbl1 PE=4 SV=1; Embryo globulin OS=Hordeum vulgare OX=4513 GN=Beg1 PE=2 SV=1	0	99	LAVVLEGEGEVQIVCPH	Carbamidomethyl(C)@15		cleaved H-L@C-term	-0.000571152	1847.94	616.989	1847.95	616.989	3	20	6.1.1.5777.6	72.8644	38.1796	38.1796			7866.12
2	18.26	18.26	18.21	tr|Q7DMU0	Storage protein OS=Triticum aestivum OX=4565 GN=Gbl1 PE=4 SV=1; Embryo globulin OS=Hordeum vulgare OX=4513 GN=Beg1 PE=2 SV=1	0	99	LAVVLEGEGEVQIVCPH	Carbamidomethyl(C)@15		cleaved H-L@C-term	-0.00313445	1847.94	616.988	1847.95	616.989	3	21	6.1.1.5778.7	72.9632	39.7941	39.7941			8265.63
2	18.26	18.26	18.21	tr|Q7DMU0	Storage protein OS=Triticum aestivum OX=4565 GN=Gbl1 PE=4 SV=1; Embryo globulin OS=Hordeum vulgare OX=4513 GN=Beg1 PE=2 SV=1	0	99	LAVVLEGEGEVQIVCPH	Carbamidomethyl(C)@15		cleaved H-L@C-term	-0.00588083	1847.94	616.987	1847.95	616.989	3	21	6.1.1.5779.7	73.0581	36.8104	36.8104			8439.63
2	18.26	18.26	18.21	tr|Q7DMU0	Storage protein OS=Triticum aestivum OX=4565 GN=Gbl1 PE=4 SV=1; Embryo globulin OS=Hordeum vulgare OX=4513 GN=Beg1 PE=2 SV=1	0	99	LAVVLEGEGEVQIVCPH	Carbamidomethyl(C)@15		cleaved H-L@C-term	-0.00203589	1847.94	616.988	1847.95	616.989	3	21	6.1.1.5780.8	73.1571	38.0532	38.0532			9079.65
2	18.26	18.26	18.21	tr|Q7DMU0	Storage protein OS=Triticum aestivum OX=4565 GN=Gbl1 PE=4 SV=1; Embryo globulin OS=Hordeum vulgare OX=4513 GN=Beg1 PE=2 SV=1	0	99	LAVVLEGEGEVQIVCPH	Carbamidomethyl(C)@15		cleaved H-L@C-term	-0.0119229	1847.93	616.985	1847.95	616.989	3	23	6.1.1.5781.6	73.2434	37.9187	37.9187			9079.9
2	18.26	18.26	18.21	tr|Q7DMU0	Storage protein OS=Triticum aestivum OX=4565 GN=Gbl1 PE=4 SV=1; Embryo globulin OS=Hordeum vulgare OX=4513 GN=Beg1 PE=2 SV=1	0	99	LAVVLEGEGEVQIVCPH	Carbamidomethyl(C)@15		cleaved H-L@C-term	-0.00459919	1847.94	616.987	1847.95	616.989	3	22	6.1.1.5782.7	73.3427	34.5501	34.5501			8755.33
2	18.26	18.26	18.21	tr|Q7DMU0	Storage protein OS=Triticum aestivum OX=4565 GN=Gbl1 PE=4 SV=1; Embryo globulin OS=Hordeum vulgare OX=4513 GN=Beg1 PE=2 SV=1	0	99	LAVVLEGEGEVQIVCPH	Carbamidomethyl(C)@15		cleaved H-L@C-term	-0.00533156	1847.94	616.987	1847.95	616.989	3	23	6.1.1.5783.8	73.4416	39.9011	39.9011			8312.38
2	18.26	18.26	18.21	tr|Q7DMU0	Storage protein OS=Triticum aestivum OX=4565 GN=Gbl1 PE=4 SV=1; Embryo globulin OS=Hordeum vulgare OX=4513 GN=Beg1 PE=2 SV=1	0	99	LAVVLEGEGEVQIVCPH	Carbamidomethyl(C)@15		cleaved H-L@C-term	-0.00295135	1847.94	616.988	1847.95	616.989	3	21	6.1.1.5784.7	73.5322	38.8552	38.8552			8115.37
2	18.26	18.26	18.21	tr|Q7DMU0	Storage protein OS=Triticum aestivum OX=4565 GN=Gbl1 PE=4 SV=1; Embryo globulin OS=Hordeum vulgare OX=4513 GN=Beg1 PE=2 SV=1	0	99	LAVVLEGEGEVQIVCPH	Carbamidomethyl(C)@15		cleaved H-L@C-term	-0.00459919	1847.94	616.987	1847.95	616.989	3	22	6.1.1.5785.8	73.631	38.1796	38.1796			8212.13
2	18.26	18.26	18.21	tr|Q7DMU0	Storage protein OS=Triticum aestivum OX=4565 GN=Gbl1 PE=4 SV=1; Embryo globulin OS=Hordeum vulgare OX=4513 GN=Beg1 PE=2 SV=1	0	99	LAVVLEGEGEVQIVCPH	Carbamidomethyl(C)@15		cleaved H-L@C-term	-0.00533156	1847.94	616.987	1847.95	616.989	3	23	6.1.1.5786.7	73.7218	33.5666	33.5666			7800.86
2	18.26	18.26	18.21	tr|Q7DMU0	Storage protein OS=Triticum aestivum OX=4565 GN=Gbl1 PE=4 SV=1; Embryo globulin OS=Hordeum vulgare OX=4513 GN=Beg1 PE=2 SV=1	0	99	LAVVLEGEGEVQIVCPH	Carbamidomethyl(C)@15		cleaved H-L@C-term	-0.00258517	1847.94	616.988	1847.95	616.989	3	22	6.1.1.5787.7	73.8167	35.6609	35.6609			7891.62
2	18.26	18.26	18.21	tr|Q7DMU0	Storage protein OS=Triticum aestivum OX=4565 GN=Gbl1 PE=4 SV=1; Embryo globulin OS=Hordeum vulgare OX=4513 GN=Beg1 PE=2 SV=1	0	99	LAVVLEGEGEVQIVCPH	Carbamidomethyl(C)@15		cleaved H-L@C-term	0.00107668	1847.95	616.989	1847.95	616.989	3	21	6.1.1.5788.8	73.9157	36.5528	36.5528			7818.61
2	18.26	18.26	18.21	tr|Q7DMU0	Storage protein OS=Triticum aestivum OX=4565 GN=Gbl1 PE=4 SV=1; Embryo globulin OS=Hordeum vulgare OX=4513 GN=Beg1 PE=2 SV=1	0	99	LAVVLEGEGEVQIVCPH	Carbamidomethyl(C)@15		cleaved H-L@C-term	-0.00258517	1847.94	616.988	1847.95	616.989	3	22	6.1.1.5789.6	74.002	38.1796	38.1796			8105.12
2	18.26	18.26	18.21	tr|Q7DMU0	Storage protein OS=Triticum aestivum OX=4565 GN=Gbl1 PE=4 SV=1; Embryo globulin OS=Hordeum vulgare OX=4513 GN=Beg1 PE=2 SV=1	0	99	LAVVLEGEGEVQIVCPH	Carbamidomethyl(C)@15		cleaved H-L@C-term	-0.0067963	1847.94	616.987	1847.95	616.989	3	22	6.1.1.5790.8	74.1053	32.9051	32.9051			8216.13
2	18.26	18.26	18.21	tr|Q7DMU0	Storage protein OS=Triticum aestivum OX=4565 GN=Gbl1 PE=4 SV=1; Embryo globulin OS=Hordeum vulgare OX=4513 GN=Beg1 PE=2 SV=1	0	99	LAVVLEGEGEVQIVCPH	Carbamidomethyl(C)@15		cleaved H-L@C-term	-0.00258517	1847.94	616.988	1847.95	616.989	3	19	6.1.1.5791.8	74.2002	36.4672	36.4672			7997.12
2	18.26	18.26	18.21	tr|Q7DMU0	Storage protein OS=Triticum aestivum OX=4565 GN=Gbl1 PE=4 SV=1; Embryo globulin OS=Hordeum vulgare OX=4513 GN=Beg1 PE=2 SV=1	0	99	LAVVLEGEGEVQIVCPH	Carbamidomethyl(C)@15		cleaved H-L@C-term	0.00833266	1847.95	924.984	1847.95	924.98	2	21	6.1.1.5792.21	74.3492	2201.7	1916.06	73.02	2.28	6611.83
2	18.26	18.26	18.21	tr|Q7DMU0	Storage protein OS=Triticum aestivum OX=4565 GN=Gbl1 PE=4 SV=1; Embryo globulin OS=Hordeum vulgare OX=4513 GN=Beg1 PE=2 SV=1	0	99	LAVVLEGEGEVQIVCPH	Carbamidomethyl(C)@15		cleaved H-L@C-term	-0.00789485	1847.94	616.986	1847.95	616.989	3	20	6.1.1.5793.7	74.3855	37.712	37.712			7350.35
2	18.26	18.26	18.21	tr|Q7DMU0	Storage protein OS=Triticum aestivum OX=4565 GN=Gbl1 PE=4 SV=1; Embryo globulin OS=Hordeum vulgare OX=4513 GN=Beg1 PE=2 SV=1	0	99	LAVVLEGEGEVQIVCPH	Carbamidomethyl(C)@15		cleaved H-L@C-term	0.000710496	1847.95	616.989	1847.95	616.989	3	22	6.1.1.5794.6	74.4762	36.238	36.238			7810.11
2	18.26	18.26	18.21	tr|Q7DMU0	Storage protein OS=Triticum aestivum OX=4565 GN=Gbl1 PE=4 SV=1; Embryo globulin OS=Hordeum vulgare OX=4513 GN=Beg1 PE=2 SV=1	0	99	LAVVLEGEGEVQIVCPH	Carbamidomethyl(C)@15		cleaved H-L@C-term	-0.00954268	1847.94	616.986	1847.95	616.989	3	20	6.1.1.5795.7	74.5753	32.4112	32.4112			8303.13
2	18.26	18.26	18.21	tr|Q7DMU0	Storage protein OS=Triticum aestivum OX=4565 GN=Gbl1 PE=4 SV=1; Embryo globulin OS=Hordeum vulgare OX=4513 GN=Beg1 PE=2 SV=1	0	99	LAVVLEGEGEVQIVCPH	Carbamidomethyl(C)@15		cleaved H-L@C-term	-0.00258517	1847.94	616.988	1847.95	616.989	3	21	6.1.1.5796.7	74.6701	34.1086	34.1086			8608.14
2	18.26	18.26	18.21	tr|Q7DMU0	Storage protein OS=Triticum aestivum OX=4565 GN=Gbl1 PE=4 SV=1; Embryo globulin OS=Hordeum vulgare OX=4513 GN=Beg1 PE=2 SV=1	0	99	LAVVLEGEGEVQIVCPH	Carbamidomethyl(C)@15		cleaved H-L@C-term	-0.000571152	1847.94	616.989	1847.95	616.989	3	20	6.1.1.5797.6	74.761	33.3929	33.3929			8648.14
2	18.26	18.26	18.21	tr|Q7DMU0	Storage protein OS=Triticum aestivum OX=4565 GN=Gbl1 PE=4 SV=1; Embryo globulin OS=Hordeum vulgare OX=4513 GN=Beg1 PE=2 SV=1	0	99	LAVVLEGEGEVQIVCPH	Carbamidomethyl(C)@15		cleaved H-L@C-term	-0.00459919	1847.94	616.987	1847.95	616.989	3	22	6.1.1.5798.6	74.8558	38.5797	38.5797			8292.69
2	18.26	18.26	18.21	tr|Q7DMU0	Storage protein OS=Triticum aestivum OX=4565 GN=Gbl1 PE=4 SV=1; Embryo globulin OS=Hordeum vulgare OX=4513 GN=Beg1 PE=2 SV=1	0	99	LAVVLEGEGEVQIVCPH	Carbamidomethyl(C)@15		cleaved H-L@C-term	-0.00624702	1847.94	616.987	1847.95	616.989	3	20	6.1.1.5799.9	74.9629	40.0446	40.0446			7805.12
2	18.26	18.26	18.21	tr|Q7DMU0	Storage protein OS=Triticum aestivum OX=4565 GN=Gbl1 PE=4 SV=1; Embryo globulin OS=Hordeum vulgare OX=4513 GN=Beg1 PE=2 SV=1	0	99	LAVVLEGEGEVQIVCPH	Carbamidomethyl(C)@15		cleaved H-L@C-term	0.0996867	1848.04	617.022	1847.95	616.989	3	20	8.1.1.5881.6	76.9736	5490.31	4629.14	76.28	0.95	10829.2
2	18.26	18.26	18.21	tr|Q7DMU0	Storage protein OS=Triticum aestivum OX=4565 GN=Gbl1 PE=4 SV=1; Embryo globulin OS=Hordeum vulgare OX=4513 GN=Beg1 PE=2 SV=1	0	99	LAVVLEGEGEVQIVCPH	Carbamidomethyl(C)@15		cleaved H-L@C-term	0.0978556	1848.04	617.022	1847.95	616.989	3	25	8.1.1.5694.6	59.2658	32342.7	30668.6	59.43	1.7	60938
2	18.26	18.26	18.21	tr|Q7DMU0	Storage protein OS=Triticum aestivum OX=4565 GN=Gbl1 PE=4 SV=1; Embryo globulin OS=Hordeum vulgare OX=4513 GN=Beg1 PE=2 SV=1	0	99	LAVVLEGEGEVQIVCPH	Carbamidomethyl(C)@15; Carbamidomethyl(H)@17		cleaved H-L@C-term	0.104224	1905.07	636.031	1904.97	635.996	3	21	8.1.1.5701.3	59.9166	6286.61	4991.12	59.34	1.33	15788.9
2	18.26	18.26	18.21	tr|Q7DMU0	Storage protein OS=Triticum aestivum OX=4565 GN=Gbl1 PE=4 SV=1; Embryo globulin OS=Hordeum vulgare OX=4513 GN=Beg1 PE=2 SV=1	0	99	LAVVLEGEGEVQIVCPH	Carbamidomethyl(C)@15		cleaved H-L@C-term	0.0956583	1848.04	617.021	1847.95	616.989	3	20	8.1.1.5734.3	63.0412	9392.79	6877.76	63.69	1.23	14705.8
2	18.26	18.26	18.21	tr|Q7DMU0	Storage protein OS=Triticum aestivum OX=4565 GN=Gbl1 PE=4 SV=1; Embryo globulin OS=Hordeum vulgare OX=4513 GN=Beg1 PE=2 SV=1	0	99	LAVVLEGEGEVQIVCPH	Carbamidomethyl(C)@15		cleaved H-L@C-term	0.0956583	1848.04	617.021	1847.95	616.989	3	19	8.1.1.5735.3	63.1355	9392.79	7056.2	63.69	1.23	14892.1
2	18.26	18.26	18.21	tr|Q7DMU0	Storage protein OS=Triticum aestivum OX=4565 GN=Gbl1 PE=4 SV=1; Embryo globulin OS=Hordeum vulgare OX=4513 GN=Beg1 PE=2 SV=1	0	99	LAVVLEGEGEVQIVCPH	Carbamidomethyl(C)@15		cleaved H-L@C-term	0.0956583	1848.04	617.021	1847.95	616.989	3	22	8.1.1.5736.3	63.2301	9392.79	7098.26	63.69	1.23	15901.4
2	18.26	18.26	18.21	tr|Q7DMU0	Storage protein OS=Triticum aestivum OX=4565 GN=Gbl1 PE=4 SV=1; Embryo globulin OS=Hordeum vulgare OX=4513 GN=Beg1 PE=2 SV=1	0	99	LAVVLEGEGEVQIVCPH	Carbamidomethyl(C)@15		cleaved H-L@C-term	0.0956583	1848.04	617.021	1847.95	616.989	3	22	8.1.1.5737.3	63.3246	9392.79	7487.88	63.69	1.23	16921.4
2	18.26	18.26	18.21	tr|Q7DMU0	Storage protein OS=Triticum aestivum OX=4565 GN=Gbl1 PE=4 SV=1; Embryo globulin OS=Hordeum vulgare OX=4513 GN=Beg1 PE=2 SV=1	0	99	LAVVLEGEGEVQIVCPH	Carbamidomethyl(C)@15		cleaved H-L@C-term	0.0956583	1848.04	617.021	1847.95	616.989	3	22	8.1.1.5738.6	63.4316	9392.79	7647.3	63.69	1.23	16527.1
2	18.26	18.26	18.21	tr|Q7DMU0	Storage protein OS=Triticum aestivum OX=4565 GN=Gbl1 PE=4 SV=1; Embryo globulin OS=Hordeum vulgare OX=4513 GN=Beg1 PE=2 SV=1	0	99	LAVVLEGEGEVQIVCPH	Carbamidomethyl(C)@15		cleaved H-L@C-term	0.0956583	1848.04	617.021	1847.95	616.989	3	20	8.1.1.5739.5	63.5221	9392.79	8414.61	63.69	1.23	17307.7
2	18.26	18.26	18.21	tr|Q7DMU0	Storage protein OS=Triticum aestivum OX=4565 GN=Gbl1 PE=4 SV=1; Embryo globulin OS=Hordeum vulgare OX=4513 GN=Beg1 PE=2 SV=1	0	99	LAVVLEGEGEVQIVCPH	Carbamidomethyl(C)@15		cleaved H-L@C-term	0.0956583	1848.04	617.021	1847.95	616.989	3	20	8.1.1.5740.3	63.6084	9392.79	8975.81	63.69	1.23	19059
2	18.26	18.26	18.21	tr|Q7DMU0	Storage protein OS=Triticum aestivum OX=4565 GN=Gbl1 PE=4 SV=1; Embryo globulin OS=Hordeum vulgare OX=4513 GN=Beg1 PE=2 SV=1	0	99	LAVVLEGEGEVQIVCPH	Carbamidomethyl(C)@15		cleaved H-L@C-term	0.0956583	1848.04	617.021	1847.95	616.989	3	22	8.1.1.5741.5	63.7112	9392.79	9294.42	63.69	1.23	20234.2
2	18.26	18.26	18.21	tr|Q7DMU0	Storage protein OS=Triticum aestivum OX=4565 GN=Gbl1 PE=4 SV=1; Embryo globulin OS=Hordeum vulgare OX=4513 GN=Beg1 PE=2 SV=1	0	99	LAVVLEGEGEVQIVCPH	Carbamidomethyl(C)@15		cleaved H-L@C-term	0.0956583	1848.04	617.021	1847.95	616.989	3	20	8.1.1.5742.3	63.7975	9392.79	8968.5	63.69	1.23	20735
2	18.26	18.26	18.21	tr|Q7DMU0	Storage protein OS=Triticum aestivum OX=4565 GN=Gbl1 PE=4 SV=1; Embryo globulin OS=Hordeum vulgare OX=4513 GN=Beg1 PE=2 SV=1	0	99	LAVVLEGEGEVQIVCPH	Carbamidomethyl(C)@15		cleaved H-L@C-term	0.0956583	1848.04	617.021	1847.95	616.989	3	20	8.1.1.5743.3	63.892	9392.79	8899.6	63.69	1.23	19457
2	18.26	18.26	18.21	tr|Q7DMU0	Storage protein OS=Triticum aestivum OX=4565 GN=Gbl1 PE=4 SV=1; Embryo globulin OS=Hordeum vulgare OX=4513 GN=Beg1 PE=2 SV=1	0	99	LAVVLEGEGEVQIVCPH	Carbamidomethyl(C)@15		cleaved H-L@C-term	0.0978556	1848.04	617.022	1847.95	616.989	3	24	8.1.1.5800.5	69.2887	7789.64	7687.84	70.02	1.52	16623.6
2	18.26	18.26	18.21	tr|Q7DMU0	Storage protein OS=Triticum aestivum OX=4565 GN=Gbl1 PE=4 SV=1; Embryo globulin OS=Hordeum vulgare OX=4513 GN=Beg1 PE=2 SV=1	0	99	LAVVLEGEGEVQIVCPH	Carbamidomethyl(C)@15		cleaved H-L@C-term	0.0998698	1848.05	617.022	1847.95	616.989	3	24	8.1.1.5820.4	71.1801	7390.19	7143.01	70.97	1.42	14876.8
2	18.26	18.26	18.21	tr|Q7DMU0	Storage protein OS=Triticum aestivum OX=4565 GN=Gbl1 PE=4 SV=1; Embryo globulin OS=Hordeum vulgare OX=4513 GN=Beg1 PE=2 SV=1	0	99	LAVVLEGEGEVQIVCPH	Carbamidomethyl(C)@15		cleaved H-L@C-term	0.0974894	1848.04	617.021	1847.95	616.989	3	23	8.1.1.5846.8	73.6633	6659.18	5664.09	72.87	1.14	13369.5
2	18.26	18.26	18.21	tr|Q7DMU0	Storage protein OS=Triticum aestivum OX=4565 GN=Gbl1 PE=4 SV=1; Embryo globulin OS=Hordeum vulgare OX=4513 GN=Beg1 PE=2 SV=1	0	99	LAVVLEGEGEVQIVCPH	Carbamidomethyl(C)@15		cleaved H-L@C-term	0.0978556	1848.04	617.022	1847.95	616.989	3	22	8.1.1.5868.8	75.749	6027.21	4843.69	74.96	1.14	11911
2	18.26	18.26	18.21	tr|Q7DMU0	Storage protein OS=Triticum aestivum OX=4565 GN=Gbl1 PE=4 SV=1; Embryo globulin OS=Hordeum vulgare OX=4513 GN=Beg1 PE=2 SV=1	0	99	LAVVLEGEGEVQIVCPH	Carbamidomethyl(C)@15		cleaved H-L@C-term	0.0987711	1848.04	617.022	1847.95	616.989	3	21	8.1.1.5882.7	77.0726	4998.72	4755.11	77.23	1.04	10715.5
2	18.26	18.26	18.21	tr|Q7DMU0	Storage protein OS=Triticum aestivum OX=4565 GN=Gbl1 PE=4 SV=1; Embryo globulin OS=Hordeum vulgare OX=4513 GN=Beg1 PE=2 SV=1	0	99	LAVVLEGEGEVQIVCPH	Carbamidomethyl(C)@15		cleaved H-L@C-term	0.0987711	1848.04	617.022	1847.95	616.989	3	21	8.1.1.5886.9	77.4606	4998.72	4703.39	77.23	1.04	10871.5
2	18.26	18.26	18.21	tr|Q7DMU0	Storage protein OS=Triticum aestivum OX=4565 GN=Gbl1 PE=4 SV=1; Embryo globulin OS=Hordeum vulgare OX=4513 GN=Beg1 PE=2 SV=1	0	99	LAVVLEGEGEVQIVCPH	Carbamidomethyl(C)@15		cleaved H-L@C-term	0.101518	1848.05	617.023	1847.95	616.989	3	22	8.1.1.5894.9	78.2198	4943.05	4719.5	78.27	1.33	10903.5
2	18.26	18.26	18.21	tr|Q7DMU0	Storage protein OS=Triticum aestivum OX=4565 GN=Gbl1 PE=4 SV=1; Embryo globulin OS=Hordeum vulgare OX=4513 GN=Beg1 PE=2 SV=1	0	99	LAVVLEGEGEVQIVCPH	Carbamidomethyl(C)@15		cleaved H-L@C-term	0.101518	1848.05	617.023	1847.95	616.989	3	21	8.1.1.5906.7	79.3499	4943.05	3874.74	78.27	1.33	9332.91
2	18.26	18.26	18.21	tr|Q7DMU0	Storage protein OS=Triticum aestivum OX=4565 GN=Gbl1 PE=4 SV=1; Embryo globulin OS=Hordeum vulgare OX=4513 GN=Beg1 PE=2 SV=1	0	99	LAVVLEGEGEVQIVCPH	Carbamidomethyl(C)@15		cleaved H-L@C-term	0.0978556	1848.04	617.022	1847.95	616.989	3	23	8.1.1.5860.6	74.9827	6027.21	5970.67	74.96	1.14	13008.3
2	18.26	18.26	18.21	tr|Q7DMU0	Storage protein OS=Triticum aestivum OX=4565 GN=Gbl1 PE=4 SV=1; Embryo globulin OS=Hordeum vulgare OX=4513 GN=Beg1 PE=2 SV=1	0	99	LAVVLEGEGEVQIVCPH	Carbamidomethyl(C)@15		cleaved H-L@C-term	0.0996867	1848.04	617.022	1847.95	616.989	3	22	8.1.1.5876.5	76.4952	5490.31	5276	76.28	0.95	11417.7
2	18.26	18.26	18.21	tr|Q7DMU0	Storage protein OS=Triticum aestivum OX=4565 GN=Gbl1 PE=4 SV=1; Embryo globulin OS=Hordeum vulgare OX=4513 GN=Beg1 PE=2 SV=1	0	99	LAVVLEGEGEVQIVCPH	Carbamidomethyl(C)@15		cleaved H-L@C-term	0.0996867	1848.04	617.022	1847.95	616.989	3	21	8.1.1.5874.7	76.314	5490.31	5407.71	76.28	0.95	11957
2	18.26	18.26	18.21	tr|Q7DMU0	Storage protein OS=Triticum aestivum OX=4565 GN=Gbl1 PE=4 SV=1; Embryo globulin OS=Hordeum vulgare OX=4513 GN=Beg1 PE=2 SV=1	0	99	LAVVLEGEGEVQIVCPH	Carbamidomethyl(C)@15		cleaved H-L@C-term	0.0963908	1848.04	617.021	1847.95	616.989	3	24	8.1.1.5782.6	67.5881	8205.47	7943.68	67.37	1.23	18506.4
2	18.26	18.26	18.21	tr|Q7DMU0	Storage protein OS=Triticum aestivum OX=4565 GN=Gbl1 PE=4 SV=1; Embryo globulin OS=Hordeum vulgare OX=4513 GN=Beg1 PE=2 SV=1	0	99	LAVVLEGEGEVQIVCPH	Carbamidomethyl(C)@15		cleaved H-L@C-term	0.0978556	1848.04	617.022	1847.95	616.989	3	23	8.1.1.5809.7	70.1501	7789.64	7367.14	70.02	1.52	16024.4
2	18.26	18.26	18.21	tr|Q7DMU0	Storage protein OS=Triticum aestivum OX=4565 GN=Gbl1 PE=4 SV=1; Embryo globulin OS=Hordeum vulgare OX=4513 GN=Beg1 PE=2 SV=1	0	99	LAVVLEGEGEVQIVCPH	Carbamidomethyl(C)@15		cleaved H-L@C-term	0.0998698	1848.05	617.022	1847.95	616.989	3	23	8.1.1.5822.7	71.382	7390.19	6881.53	70.97	1.42	15281.1
2	18.26	18.26	18.21	tr|Q7DMU0	Storage protein OS=Triticum aestivum OX=4565 GN=Gbl1 PE=4 SV=1; Embryo globulin OS=Hordeum vulgare OX=4513 GN=Beg1 PE=2 SV=1	0	99	LAVVLEGEGEVQIVCPH	Carbamidomethyl(C)@15		cleaved H-L@C-term	0.0974894	1848.04	617.021	1847.95	616.989	3	22	8.1.1.5843.7	73.3746	6659.18	6073.33	72.87	1.14	13841.8
2	18.26	18.26	18.21	tr|Q7DMU0	Storage protein OS=Triticum aestivum OX=4565 GN=Gbl1 PE=4 SV=1; Embryo globulin OS=Hordeum vulgare OX=4513 GN=Beg1 PE=2 SV=1	0	99	LAVVLEGEGEVQIVCPH	Carbamidomethyl(C)@15		cleaved H-L@C-term	0.0978556	1848.04	617.022	1847.95	616.989	3	21	8.1.1.5858.7	74.7972	6027.21	5728.29	74.96	1.14	12659
2	18.26	18.26	18.21	tr|Q7DMU0	Storage protein OS=Triticum aestivum OX=4565 GN=Gbl1 PE=4 SV=1; Embryo globulin OS=Hordeum vulgare OX=4513 GN=Beg1 PE=2 SV=1	0	99	LAVVLEGEGEVQIVCPH	Carbamidomethyl(C)@15		cleaved H-L@C-term	0.101518	1848.05	617.023	1847.95	616.989	3	22	8.1.1.5895.10	78.3189	4943.05	4909.4	78.27	1.33	10908.5
2	18.26	18.26	18.21	tr|Q7DMU0	Storage protein OS=Triticum aestivum OX=4565 GN=Gbl1 PE=4 SV=1; Embryo globulin OS=Hordeum vulgare OX=4513 GN=Beg1 PE=2 SV=1	0	99	LAVVLEGEGEVQIVCPH	Carbamidomethyl(C)@15		cleaved H-L@C-term	0.101518	1848.05	617.023	1847.95	616.989	3	20	8.1.1.5904.8	79.1645	4943.05	4168.67	78.27	1.33	9882.93
2	18.26	18.26	18.21	tr|Q7DMU0	Storage protein OS=Triticum aestivum OX=4565 GN=Gbl1 PE=4 SV=1; Embryo globulin OS=Hordeum vulgare OX=4513 GN=Beg1 PE=2 SV=1	0	99	LAVVLEGEGEVQIVCPH	Carbamidomethyl(C)@15		cleaved H-L@C-term	0.115264	1848.06	925.038	1847.95	924.98	2	22	5.1.1.6486.20	60.4824	124.548	124.548			38079.8
2	18.26	18.26	18.21	tr|Q7DMU0	Storage protein OS=Triticum aestivum OX=4565 GN=Gbl1 PE=4 SV=1; Embryo globulin OS=Hordeum vulgare OX=4513 GN=Beg1 PE=2 SV=1	0	99	LAVVLEGEGEVQIVCPH	Carbamidomethyl(C)@15		cleaved H-L@C-term	0.11856	1848.06	925.039	1847.95	924.98	2	22	5.1.1.6489.20	60.7669	124.605	124.605			30876.8
2	18.26	18.26	18.21	tr|Q7DMU0	Storage protein OS=Triticum aestivum OX=4565 GN=Gbl1 PE=4 SV=1; Embryo globulin OS=Hordeum vulgare OX=4513 GN=Beg1 PE=2 SV=1	0	99	LAVVLEGEGEVQIVCPH	Carbamidomethyl(C)@15		cleaved H-L@C-term	0.0978556	1848.04	617.022	1847.95	616.989	3	23	8.1.1.5690.9	58.8996	32342.7	28867	59.43	1.7	56310.6
2	18.26	18.26	18.21	tr|Q7DMU0	Storage protein OS=Triticum aestivum OX=4565 GN=Gbl1 PE=4 SV=1; Embryo globulin OS=Hordeum vulgare OX=4513 GN=Beg1 PE=2 SV=1	0	99	LAVVLEGEGEVQIVCPH	Carbamidomethyl(C)@15		cleaved H-L@C-term	0.0978556	1848.04	617.022	1847.95	616.989	3	24	8.1.1.5697.3	59.5375	32342.7	28478.8	59.43	1.7	49921.4
2	18.26	18.26	18.21	tr|Q7DMU0	Storage protein OS=Triticum aestivum OX=4565 GN=Gbl1 PE=4 SV=1; Embryo globulin OS=Hordeum vulgare OX=4513 GN=Beg1 PE=2 SV=1	0	99	LAVVLEGEGEVQIVCPH	Carbamidomethyl(C)@15		cleaved H-L@C-term	0.0978556	1848.04	617.022	1847.95	616.989	3	22	8.1.1.5802.5	69.4784	7789.64	6889.93	70.02	1.52	16585.1
2	18.26	18.26	18.21	tr|Q7DMU0	Storage protein OS=Triticum aestivum OX=4565 GN=Gbl1 PE=4 SV=1; Embryo globulin OS=Hordeum vulgare OX=4513 GN=Beg1 PE=2 SV=1	0	99	LAVVLEGEGEVQIVCPH	Carbamidomethyl(C)@15		cleaved H-L@C-term	0.0998698	1848.05	617.022	1847.95	616.989	3	21	8.1.1.5823.4	71.4644	7390.19	6926.51	70.97	1.42	15111.3
2	18.26	18.26	18.21	tr|Q7DMU0	Storage protein OS=Triticum aestivum OX=4565 GN=Gbl1 PE=4 SV=1; Embryo globulin OS=Hordeum vulgare OX=4513 GN=Beg1 PE=2 SV=1	0	99	LAVVLEGEGEVQIVCPH	Carbamidomethyl(C)@15		cleaved H-L@C-term	0.0996867	1848.04	617.022	1847.95	616.989	3	21	8.1.1.5880.9	76.8914	5490.31	4587.58	76.28	0.95	10638.7
2	18.26	18.26	18.21	tr|Q7DMU0	Storage protein OS=Triticum aestivum OX=4565 GN=Gbl1 PE=4 SV=1; Embryo globulin OS=Hordeum vulgare OX=4513 GN=Beg1 PE=2 SV=1	0	99	LAVVLEGEGEVQIVCPH	Carbamidomethyl(C)@15		cleaved H-L@C-term	0.0987711	1848.04	617.022	1847.95	616.989	3	21	8.1.1.5883.7	77.1675	4998.72	4956.23	77.23	1.04	11376.7
2	18.26	18.26	18.21	tr|Q7DMU0	Storage protein OS=Triticum aestivum OX=4565 GN=Gbl1 PE=4 SV=1; Embryo globulin OS=Hordeum vulgare OX=4513 GN=Beg1 PE=2 SV=1	0	99	LAVVLEGEGEVQIVCPH	Carbamidomethyl(C)@15		cleaved H-L@C-term	0.101518	1848.05	617.023	1847.95	616.989	3	21	8.1.1.5893.8	78.1207	4943.05	4537.63	78.27	1.33	11151
2	18.26	18.26	18.21	tr|Q7DMU0	Storage protein OS=Triticum aestivum OX=4565 GN=Gbl1 PE=4 SV=1; Embryo globulin OS=Hordeum vulgare OX=4513 GN=Beg1 PE=2 SV=1	0	99	LAVVLEGEGEVQIVCPH	Carbamidomethyl@N-term; Carbamidomethyl(C)@15		cleaved H-L@C-term	0.00106409	1904.97	635.996	1904.97	635.996	3	14	7.1.1.5563.8	73.975	1061.98	960.81	74.32	1.8	4596.09
2	18.26	18.26	18.21	tr|Q7DMU0	Storage protein OS=Triticum aestivum OX=4565 GN=Gbl1 PE=4 SV=1; Embryo globulin OS=Hordeum vulgare OX=4513 GN=Beg1 PE=2 SV=1	0	99	LAVVLEGEGEVQIVCPH	Carbamidomethyl(C)@15		cleaved H-L@C-term	0.0956583	1848.04	617.021	1847.95	616.989	3	21	8.1.1.5746.5	64.1832	9392.79	9148.71	63.69	1.23	18039.7
2	18.26	18.26	18.21	tr|Q7DMU0	Storage protein OS=Triticum aestivum OX=4565 GN=Gbl1 PE=4 SV=1; Embryo globulin OS=Hordeum vulgare OX=4513 GN=Beg1 PE=2 SV=1	0	99	LAVVLEGEGEVQIVCPH	Carbamidomethyl(C)@15		cleaved H-L@C-term	0.0978556	1848.04	617.022	1847.95	616.989	3	22	8.1.1.5799.9	69.2107	7789.64	7636.26	70.02	1.52	16410.4
2	18.26	18.26	18.21	tr|Q7DMU0	Storage protein OS=Triticum aestivum OX=4565 GN=Gbl1 PE=4 SV=1; Embryo globulin OS=Hordeum vulgare OX=4513 GN=Beg1 PE=2 SV=1	0	99	LAVVLEGEGEVQIVCPH	Carbamidomethyl(C)@15		cleaved H-L@C-term	0.0978556	1848.04	617.022	1847.95	616.989	3	21	8.1.1.5808.5	70.0469	7789.64	7580.38	70.02	1.52	16488.6
2	18.26	18.26	18.21	tr|Q7DMU0	Storage protein OS=Triticum aestivum OX=4565 GN=Gbl1 PE=4 SV=1; Embryo globulin OS=Hordeum vulgare OX=4513 GN=Beg1 PE=2 SV=1	0	99	LAVVLEGEGEVQIVCPH	Carbamidomethyl(C)@15		cleaved H-L@C-term	0.0998698	1848.05	617.022	1847.95	616.989	3	22	8.1.1.5821.8	71.2917	7390.19	6897.79	70.97	1.42	15261.6
2	18.26	18.26	18.21	tr|Q7DMU0	Storage protein OS=Triticum aestivum OX=4565 GN=Gbl1 PE=4 SV=1; Embryo globulin OS=Hordeum vulgare OX=4513 GN=Beg1 PE=2 SV=1	0	99	LAVVLEGEGEVQIVCPH	Carbamidomethyl(C)@15		cleaved H-L@C-term	0.0998698	1848.05	617.022	1847.95	616.989	3	23	8.1.1.5828.8	71.9552	7390.19	6265.57	70.97	1.42	14383.6
2	18.26	18.26	18.21	tr|Q7DMU0	Storage protein OS=Triticum aestivum OX=4565 GN=Gbl1 PE=4 SV=1; Embryo globulin OS=Hordeum vulgare OX=4513 GN=Beg1 PE=2 SV=1	0	99	LAVVLEGEGEVQIVCPH	Carbamidomethyl(C)@15		cleaved H-L@C-term	0.0974894	1848.04	617.021	1847.95	616.989	3	22	8.1.1.5842.7	73.2798	6659.18	6440.76	72.87	1.14	13955.3
2	18.26	18.26	18.21	tr|Q7DMU0	Storage protein OS=Triticum aestivum OX=4565 GN=Gbl1 PE=4 SV=1; Embryo globulin OS=Hordeum vulgare OX=4513 GN=Beg1 PE=2 SV=1	0	99	LAVVLEGEGEVQIVCPH	Carbamidomethyl(C)@15		cleaved H-L@C-term	0.101518	1848.05	617.023	1847.95	616.989	3	20	8.1.1.5901.7	78.8758	4943.05	4495.42	78.27	1.33	10036.9
2	18.26	18.26	18.21	tr|Q7DMU0	Storage protein OS=Triticum aestivum OX=4565 GN=Gbl1 PE=4 SV=1; Embryo globulin OS=Hordeum vulgare OX=4513 GN=Beg1 PE=2 SV=1	0	99	LAVVLEGEGEVQIVCPH	Carbamidomethyl(C)@15		cleaved H-L@C-term	0.122954	1848.07	925.041	1847.95	924.98	2	20	5.1.1.6482.19	60.0986	117.02	117.02			29426
2	18.26	18.26	18.21	tr|Q7DMU0	Storage protein OS=Triticum aestivum OX=4565 GN=Gbl1 PE=4 SV=1; Embryo globulin OS=Hordeum vulgare OX=4513 GN=Beg1 PE=2 SV=1	0	98.92	LAVVLEGEGEVQIVCPH	Carbamidomethyl(C)@15		cleaved H-L@C-term	0.0974894	1848.04	617.021	1847.95	616.989	3	22	8.1.1.5751.3	64.6472	10526.4	9700.36	64.54	1.04	21001.3
2	18.26	18.26	18.21	tr|Q7DMU0	Storage protein OS=Triticum aestivum OX=4565 GN=Gbl1 PE=4 SV=1; Embryo globulin OS=Hordeum vulgare OX=4513 GN=Beg1 PE=2 SV=1	0	98.92	LAVVLEGEGEVQIVCPH	Carbamidomethyl(C)@15		cleaved H-L@C-term	0.0974894	1848.04	617.021	1847.95	616.989	3	23	8.1.1.5757.4	65.2193	9466.32	9414.75	65.2	0.95	18382.2
2	18.26	18.26	18.21	tr|Q7DMU0	Storage protein OS=Triticum aestivum OX=4565 GN=Gbl1 PE=4 SV=1; Embryo globulin OS=Hordeum vulgare OX=4513 GN=Beg1 PE=2 SV=1	0	98.92	LAVVLEGEGEVQIVCPH	Carbamidomethyl(C)@15		cleaved H-L@C-term	0.0963908	1848.04	617.021	1847.95	616.989	3	25	8.1.1.5778.5	67.2056	8205.47	7796.78	67.37	1.23	21188.3
2	18.26	18.26	18.21	tr|Q7DMU0	Storage protein OS=Triticum aestivum OX=4565 GN=Gbl1 PE=4 SV=1; Embryo globulin OS=Hordeum vulgare OX=4513 GN=Beg1 PE=2 SV=1	0	98.92	LAVVLEGEGEVQIVCPH	Carbamidomethyl(C)@15		cleaved H-L@C-term	0.0963908	1848.04	617.021	1847.95	616.989	3	25	8.1.1.5780.7	67.4031	8205.47	8167.06	67.37	1.23	19696.7
2	18.26	18.26	18.21	tr|Q7DMU0	Storage protein OS=Triticum aestivum OX=4565 GN=Gbl1 PE=4 SV=1; Embryo globulin OS=Hordeum vulgare OX=4513 GN=Beg1 PE=2 SV=1	0	98.92	LAVVLEGEGEVQIVCPH	Carbamidomethyl(C)@15		cleaved H-L@C-term	0.0998698	1848.05	617.022	1847.95	616.989	3	22	8.1.1.5792.7	68.5394	7927.7	7231.34	68.41	0.47	16307.1
2	18.26	18.26	18.21	tr|Q7DMU0	Storage protein OS=Triticum aestivum OX=4565 GN=Gbl1 PE=4 SV=1; Embryo globulin OS=Hordeum vulgare OX=4513 GN=Beg1 PE=2 SV=1	0	98.92	LAVVLEGEGEVQIVCPH	Carbamidomethyl(C)@15		cleaved H-L@C-term	0.0978556	1848.04	617.022	1847.95	616.989	3	21	8.1.1.5806.6	69.8614	7789.64	7251.04	70.02	1.52	16139.4
2	18.26	18.26	18.21	tr|Q7DMU0	Storage protein OS=Triticum aestivum OX=4565 GN=Gbl1 PE=4 SV=1; Embryo globulin OS=Hordeum vulgare OX=4513 GN=Beg1 PE=2 SV=1	0	98.92	LAVVLEGEGEVQIVCPH	Carbamidomethyl(C)@15		cleaved H-L@C-term	0.0978556	1848.04	617.022	1847.95	616.989	3	21	8.1.1.5807.5	69.9522	7789.64	7420.22	70.02	1.52	16083.4
2	18.26	18.26	18.21	tr|Q7DMU0	Storage protein OS=Triticum aestivum OX=4565 GN=Gbl1 PE=4 SV=1; Embryo globulin OS=Hordeum vulgare OX=4513 GN=Beg1 PE=2 SV=1	0	98.92	LAVVLEGEGEVQIVCPH	Carbamidomethyl(C)@15		cleaved H-L@C-term	0.0998698	1848.05	617.022	1847.95	616.989	3	21	8.1.1.5815.6	70.7142	7390.19	7355.47	70.97	1.42	15770.6
2	18.26	18.26	18.21	tr|Q7DMU0	Storage protein OS=Triticum aestivum OX=4565 GN=Gbl1 PE=4 SV=1; Embryo globulin OS=Hordeum vulgare OX=4513 GN=Beg1 PE=2 SV=1	0	98.92	LAVVLEGEGEVQIVCPH	Carbamidomethyl(C)@15		cleaved H-L@C-term	0.11917	1848.06	925.039	1847.95	924.98	2	21	8.1.1.5831.20	72.29	4741.46	4526.96	71.54	1.42	12493.5
2	18.26	18.26	18.21	tr|Q7DMU0	Storage protein OS=Triticum aestivum OX=4565 GN=Gbl1 PE=4 SV=1; Embryo globulin OS=Hordeum vulgare OX=4513 GN=Beg1 PE=2 SV=1	0	98.92	LAVVLEGEGEVQIVCPH	Carbamidomethyl(C)@15		cleaved H-L@C-term	0.0974894	1848.04	617.021	1847.95	616.989	3	22	8.1.1.5840.8	73.094	6659.18	6525.35	72.87	1.14	13635.8
2	18.26	18.26	18.21	tr|Q7DMU0	Storage protein OS=Triticum aestivum OX=4565 GN=Gbl1 PE=4 SV=1; Embryo globulin OS=Hordeum vulgare OX=4513 GN=Beg1 PE=2 SV=1	0	98.92	LAVVLEGEGEVQIVCPH	Carbamidomethyl(C)@15		cleaved H-L@C-term	0.0974894	1848.04	617.021	1847.95	616.989	3	21	8.1.1.5841.6	73.1805	6659.18	6626.34	72.87	1.14	13593.9
2	18.26	18.26	18.21	tr|Q7DMU0	Storage protein OS=Triticum aestivum OX=4565 GN=Gbl1 PE=4 SV=1; Embryo globulin OS=Hordeum vulgare OX=4513 GN=Beg1 PE=2 SV=1	0	98.92	LAVVLEGEGEVQIVCPH	Carbamidomethyl(C)@15		cleaved H-L@C-term	0.0978556	1848.04	617.022	1847.95	616.989	3	21	8.1.1.5859.8	74.8962	6027.21	5855.69	74.96	1.14	12808.2
2	18.26	18.26	18.21	tr|Q7DMU0	Storage protein OS=Triticum aestivum OX=4565 GN=Gbl1 PE=4 SV=1; Embryo globulin OS=Hordeum vulgare OX=4513 GN=Beg1 PE=2 SV=1	0	98.92	LAVVLEGEGEVQIVCPH	Carbamidomethyl(C)@15		cleaved H-L@C-term	0.0978556	1848.04	617.022	1847.95	616.989	3	21	8.1.1.5861.5	75.0731	6027.21	5999.29	74.96	1.14	12809.7
2	18.26	18.26	18.21	tr|Q7DMU0	Storage protein OS=Triticum aestivum OX=4565 GN=Gbl1 PE=4 SV=1; Embryo globulin OS=Hordeum vulgare OX=4513 GN=Beg1 PE=2 SV=1	0	98.92	LAVVLEGEGEVQIVCPH	Carbamidomethyl(C)@15		cleaved H-L@C-term	0.0978556	1848.04	617.022	1847.95	616.989	3	21	8.1.1.5863.6	75.2667	6027.21	5733.83	74.96	1.14	12352.2
2	18.26	18.26	18.21	tr|Q7DMU0	Storage protein OS=Triticum aestivum OX=4565 GN=Gbl1 PE=4 SV=1; Embryo globulin OS=Hordeum vulgare OX=4513 GN=Beg1 PE=2 SV=1	0	98.92	LAVVLEGEGEVQIVCPH	Carbamidomethyl(C)@15		cleaved H-L@C-term	0.0978556	1848.04	617.022	1847.95	616.989	3	20	8.1.1.5865.7	75.4603	6027.21	5198.69	74.96	1.14	11652
2	18.26	18.26	18.21	tr|Q7DMU0	Storage protein OS=Triticum aestivum OX=4565 GN=Gbl1 PE=4 SV=1; Embryo globulin OS=Hordeum vulgare OX=4513 GN=Beg1 PE=2 SV=1	0	98.92	LAVVLEGEGEVQIVCPH	Carbamidomethyl(C)@15		cleaved H-L@C-term	0.0996867	1848.04	617.022	1847.95	616.989	3	22	8.1.1.5872.9	76.1325	5490.31	5457.76	76.28	0.95	12117.8
2	18.26	18.26	18.21	tr|Q7DMU0	Storage protein OS=Triticum aestivum OX=4565 GN=Gbl1 PE=4 SV=1; Embryo globulin OS=Hordeum vulgare OX=4513 GN=Beg1 PE=2 SV=1	0	98.92	LAVVLEGEGEVQIVCPH	Carbamidomethyl(C)@15		cleaved H-L@C-term	0.0996867	1848.04	617.022	1847.95	616.989	3	21	8.1.1.5878.7	76.6933	5490.31	5013.99	76.28	0.95	11245.7
2	18.26	18.26	18.21	tr|Q7DMU0	Storage protein OS=Triticum aestivum OX=4565 GN=Gbl1 PE=4 SV=1; Embryo globulin OS=Hordeum vulgare OX=4513 GN=Beg1 PE=2 SV=1	0	98.92	LAVVLEGEGEVQIVCPH	Carbamidomethyl(C)@15		cleaved H-L@C-term	0.0987711	1848.04	617.022	1847.95	616.989	3	21	8.1.1.5884.6	77.2583	4998.72	4966.04	77.23	1.04	11764.5
2	18.26	18.26	18.21	tr|Q7DMU0	Storage protein OS=Triticum aestivum OX=4565 GN=Gbl1 PE=4 SV=1; Embryo globulin OS=Hordeum vulgare OX=4513 GN=Beg1 PE=2 SV=1	0	98.92	LAVVLEGEGEVQIVCPH	Carbamidomethyl(C)@15		cleaved H-L@C-term	0.0987711	1848.04	617.022	1847.95	616.989	3	21	8.1.1.5889.9	77.7451	4998.72	4565.93	77.23	1.04	10374.7
2	18.26	18.26	18.21	tr|Q7DMU0	Storage protein OS=Triticum aestivum OX=4565 GN=Gbl1 PE=4 SV=1; Embryo globulin OS=Hordeum vulgare OX=4513 GN=Beg1 PE=2 SV=1	0	98.92	LAVVLEGEGEVQIVCPH	Carbamidomethyl(C)@15		cleaved H-L@C-term	0.101518	1848.05	617.023	1847.95	616.989	3	20	8.1.1.5896.8	78.4055	4943.05	4869.67	78.27	1.33	10463.2
2	18.26	18.26	18.21	tr|Q7DMU0	Storage protein OS=Triticum aestivum OX=4565 GN=Gbl1 PE=4 SV=1; Embryo globulin OS=Hordeum vulgare OX=4513 GN=Beg1 PE=2 SV=1	0	98.92	LAVVLEGEGEVQIVCPH	Carbamidomethyl(C)@15		cleaved H-L@C-term	0.101518	1848.05	617.023	1847.95	616.989	3	20	8.1.1.5897.9	78.5045	4943.05	4680.97	78.27	1.33	10353.9
2	18.26	18.26	18.21	tr|Q7DMU0	Storage protein OS=Triticum aestivum OX=4565 GN=Gbl1 PE=4 SV=1; Embryo globulin OS=Hordeum vulgare OX=4513 GN=Beg1 PE=2 SV=1	0	98.92	LAVVLEGEGEVQIVCPH	Carbamidomethyl(C)@15		cleaved H-L@C-term	0.101518	1848.05	617.023	1847.95	616.989	3	20	8.1.1.5899.7	78.6859	4943.05	4566.37	78.27	1.33	10074.7
2	18.26	18.26	18.21	tr|Q7DMU0	Storage protein OS=Triticum aestivum OX=4565 GN=Gbl1 PE=4 SV=1; Embryo globulin OS=Hordeum vulgare OX=4513 GN=Beg1 PE=2 SV=1	0	98.92	LAVVLEGEGEVQIVCPH	Carbamidomethyl(C)@15		cleaved H-L@C-term	0.101518	1848.05	617.023	1847.95	616.989	3	19	8.1.1.5900.5	78.7726	4943.05	4576.1	78.27	1.33	10098.9
2	18.26	18.26	18.21	tr|Q7DMU0	Storage protein OS=Triticum aestivum OX=4565 GN=Gbl1 PE=4 SV=1; Embryo globulin OS=Hordeum vulgare OX=4513 GN=Beg1 PE=2 SV=1	0	98.92	LAVVLEGEGEVQIVCPH	Carbamidomethyl(C)@15		cleaved H-L@C-term	0.101518	1848.05	617.023	1847.95	616.989	3	20	8.1.1.5902.8	78.9748	4943.05	4365.4	78.27	1.33	10039.4
2	18.26	18.26	18.21	tr|Q7DMU0	Storage protein OS=Triticum aestivum OX=4565 GN=Gbl1 PE=4 SV=1; Embryo globulin OS=Hordeum vulgare OX=4513 GN=Beg1 PE=2 SV=1	0	98.92	LAVVLEGEGEVQIVCPH	Carbamidomethyl(C)@15		cleaved H-L@C-term	0.101518	1848.05	617.023	1847.95	616.989	3	21	8.1.1.5903.9	79.0739	4943.05	4289.98	78.27	1.33	10163.2
2	18.26	18.26	18.21	tr|Q7DMU0	Storage protein OS=Triticum aestivum OX=4565 GN=Gbl1 PE=4 SV=1; Embryo globulin OS=Hordeum vulgare OX=4513 GN=Beg1 PE=2 SV=1	0	98.3	LAVVLEGEGEVQIVCPH	Carbamidomethyl(C)@15		cleaved H-L@C-term	0.0974894	1848.04	617.021	1847.95	616.989	3	21	8.1.1.5752.3	64.7419	10526.4	9207.85	64.54	1.04	19668.7
2	18.26	18.26	18.21	tr|Q7DMU0	Storage protein OS=Triticum aestivum OX=4565 GN=Gbl1 PE=4 SV=1; Embryo globulin OS=Hordeum vulgare OX=4513 GN=Beg1 PE=2 SV=1	0	98.3	LAVVLEGEGEVQIVCPH	Carbamidomethyl(C)@15		cleaved H-L@C-term	0.0974894	1848.04	617.021	1847.95	616.989	3	21	8.1.1.5753.4	64.8408	10526.4	8871.12	64.54	1.04	18603.1
2	18.26	18.26	18.21	tr|Q7DMU0	Storage protein OS=Triticum aestivum OX=4565 GN=Gbl1 PE=4 SV=1; Embryo globulin OS=Hordeum vulgare OX=4513 GN=Beg1 PE=2 SV=1	0	98.3	LAVVLEGEGEVQIVCPH	Carbamidomethyl(C)@15		cleaved H-L@C-term	0.0974894	1848.04	617.021	1847.95	616.989	3	21	8.1.1.5756.3	65.1203	9466.32	8989.44	65.2	0.95	19521.7
2	18.26	18.26	18.21	tr|Q7DMU0	Storage protein OS=Triticum aestivum OX=4565 GN=Gbl1 PE=4 SV=1; Embryo globulin OS=Hordeum vulgare OX=4513 GN=Beg1 PE=2 SV=1	0	98.3	LAVVLEGEGEVQIVCPH	Carbamidomethyl(C)@15		cleaved H-L@C-term	0.0963908	1848.04	617.021	1847.95	616.989	3	22	8.1.1.5777.6	67.1151	8205.47	7649.87	67.37	1.23	20807.7
2	18.26	18.26	18.21	tr|Q7DMU0	Storage protein OS=Triticum aestivum OX=4565 GN=Gbl1 PE=4 SV=1; Embryo globulin OS=Hordeum vulgare OX=4513 GN=Beg1 PE=2 SV=1	0	98.3	LAVVLEGEGEVQIVCPH	Carbamidomethyl(C)@15		cleaved H-L@C-term	0.0963908	1848.04	617.021	1847.95	616.989	3	22	8.1.1.5787.5	68.0576	8205.47	7325.94	67.37	1.23	17649.9
2	18.26	18.26	18.21	tr|Q7DMU0	Storage protein OS=Triticum aestivum OX=4565 GN=Gbl1 PE=4 SV=1; Embryo globulin OS=Hordeum vulgare OX=4513 GN=Beg1 PE=2 SV=1	0	98.3	LAVVLEGEGEVQIVCPH	Carbamidomethyl(C)@15		cleaved H-L@C-term	0.0978556	1848.04	617.022	1847.95	616.989	3	21	8.1.1.5803.7	69.5816	7789.64	6570.62	70.02	1.52	16307.1
2	18.26	18.26	18.21	tr|Q7DMU0	Storage protein OS=Triticum aestivum OX=4565 GN=Gbl1 PE=4 SV=1; Embryo globulin OS=Hordeum vulgare OX=4513 GN=Beg1 PE=2 SV=1	0	98.3	LAVVLEGEGEVQIVCPH	Carbamidomethyl(C)@15		cleaved H-L@C-term	0.0978556	1848.04	617.022	1847.95	616.989	3	21	8.1.1.5810.5	70.2366	7789.64	7210.22	70.02	1.52	15809.1
2	18.26	18.26	18.21	tr|Q7DMU0	Storage protein OS=Triticum aestivum OX=4565 GN=Gbl1 PE=4 SV=1; Embryo globulin OS=Hordeum vulgare OX=4513 GN=Beg1 PE=2 SV=1	0	98.3	LAVVLEGEGEVQIVCPH	Carbamidomethyl(C)@15		cleaved H-L@C-term	0.0978556	1848.04	617.022	1847.95	616.989	3	20	8.1.1.5814.6	70.6198	7789.64	7074.56	70.02	1.52	15184.6
2	18.26	18.26	18.21	tr|Q7DMU0	Storage protein OS=Triticum aestivum OX=4565 GN=Gbl1 PE=4 SV=1; Embryo globulin OS=Hordeum vulgare OX=4513 GN=Beg1 PE=2 SV=1	0	98.3	LAVVLEGEGEVQIVCPH	Carbamidomethyl(C)@15		cleaved H-L@C-term	0.0998698	1848.05	617.022	1847.95	616.989	3	20	8.1.1.5816.7	70.8131	7390.19	7335.69	70.97	1.42	16061.9
2	18.26	18.26	18.21	tr|Q7DMU0	Storage protein OS=Triticum aestivum OX=4565 GN=Gbl1 PE=4 SV=1; Embryo globulin OS=Hordeum vulgare OX=4513 GN=Beg1 PE=2 SV=1	0	98.3	LAVVLEGEGEVQIVCPH	Carbamidomethyl(C)@15		cleaved H-L@C-term	0.0974894	1848.04	617.021	1847.95	616.989	3	20	8.1.1.5837.7	72.8052	6659.18	6433.92	72.87	1.14	13672.5
2	18.26	18.26	18.21	tr|Q7DMU0	Storage protein OS=Triticum aestivum OX=4565 GN=Gbl1 PE=4 SV=1; Embryo globulin OS=Hordeum vulgare OX=4513 GN=Beg1 PE=2 SV=1	0	98.3	LAVVLEGEGEVQIVCPH	Carbamidomethyl(C)@15		cleaved H-L@C-term	0.0974894	1848.04	617.021	1847.95	616.989	3	20	8.1.1.5844.7	73.4694	6659.18	5724.49	72.87	1.14	13422.5
2	18.26	18.26	18.21	tr|Q7DMU0	Storage protein OS=Triticum aestivum OX=4565 GN=Gbl1 PE=4 SV=1; Embryo globulin OS=Hordeum vulgare OX=4513 GN=Beg1 PE=2 SV=1	0	98.3	LAVVLEGEGEVQIVCPH	Carbamidomethyl(C)@15		cleaved H-L@C-term	0.0974894	1848.04	617.021	1847.95	616.989	3	20	8.1.1.5845.7	73.5644	6659.18	5671.78	72.87	1.14	13085.5
2	18.26	18.26	18.21	tr|Q7DMU0	Storage protein OS=Triticum aestivum OX=4565 GN=Gbl1 PE=4 SV=1; Embryo globulin OS=Hordeum vulgare OX=4513 GN=Beg1 PE=2 SV=1	0	98.3	LAVVLEGEGEVQIVCPH	Carbamidomethyl(C)@15		cleaved H-L@C-term	0.0978556	1848.04	617.022	1847.95	616.989	3	20	8.1.1.5866.7	75.5553	6027.21	5078.02	74.96	1.14	11573.5
2	18.26	18.26	18.21	tr|Q7DMU0	Storage protein OS=Triticum aestivum OX=4565 GN=Gbl1 PE=4 SV=1; Embryo globulin OS=Hordeum vulgare OX=4513 GN=Beg1 PE=2 SV=1	0	98.3	LAVVLEGEGEVQIVCPH	Carbamidomethyl(C)@15		cleaved H-L@C-term	0.0978556	1848.04	617.022	1847.95	616.989	3	20	8.1.1.5867.7	75.6501	6027.21	4940.68	74.96	1.14	11754.2
2	18.26	18.26	18.21	tr|Q7DMU0	Storage protein OS=Triticum aestivum OX=4565 GN=Gbl1 PE=4 SV=1; Embryo globulin OS=Hordeum vulgare OX=4513 GN=Beg1 PE=2 SV=1	0	98.3	LAVVLEGEGEVQIVCPH	Carbamidomethyl(C)@15		cleaved H-L@C-term	0.0996867	1848.04	617.022	1847.95	616.989	3	20	8.1.1.5875.7	76.4088	5490.31	5254.73	76.28	0.95	11470.2
2	18.26	18.26	18.21	tr|Q7DMU0	Storage protein OS=Triticum aestivum OX=4565 GN=Gbl1 PE=4 SV=1; Embryo globulin OS=Hordeum vulgare OX=4513 GN=Beg1 PE=2 SV=1	0	98.3	LAVVLEGEGEVQIVCPH	Carbamidomethyl(C)@15		cleaved H-L@C-term	0.0996867	1848.04	617.022	1847.95	616.989	3	19	8.1.1.5877.7	76.5984	5490.31	5199.28	76.28	0.95	11186
2	18.26	18.26	18.21	tr|Q7DMU0	Storage protein OS=Triticum aestivum OX=4565 GN=Gbl1 PE=4 SV=1; Embryo globulin OS=Hordeum vulgare OX=4513 GN=Beg1 PE=2 SV=1	0	98.3	LAVVLEGEGEVQIVCPH	Carbamidomethyl(C)@15		cleaved H-L@C-term	0.0996867	1848.04	617.022	1847.95	616.989	3	20	8.1.1.5879.7	76.788	5490.31	4779.85	76.28	0.95	10842.7
2	18.26	18.26	18.21	tr|Q7DMU0	Storage protein OS=Triticum aestivum OX=4565 GN=Gbl1 PE=4 SV=1; Embryo globulin OS=Hordeum vulgare OX=4513 GN=Beg1 PE=2 SV=1	0	98.3	LAVVLEGEGEVQIVCPH	Carbamidomethyl(C)@15		cleaved H-L@C-term	0.0987711	1848.04	617.022	1847.95	616.989	3	20	8.1.1.5887.7	77.5471	4998.72	4689.27	77.23	1.04	10756.7
2	18.26	18.26	18.21	tr|Q7DMU0	Storage protein OS=Triticum aestivum OX=4565 GN=Gbl1 PE=4 SV=1; Embryo globulin OS=Hordeum vulgare OX=4513 GN=Beg1 PE=2 SV=1	0	98.3	LAVVLEGEGEVQIVCPH	Carbamidomethyl(C)@15		cleaved H-L@C-term	0.0987711	1848.04	617.022	1847.95	616.989	3	20	8.1.1.5888.8	77.646	4998.72	4714.15	77.23	1.04	10606.2
2	18.26	18.26	18.21	tr|Q7DMU0	Storage protein OS=Triticum aestivum OX=4565 GN=Gbl1 PE=4 SV=1; Embryo globulin OS=Hordeum vulgare OX=4513 GN=Beg1 PE=2 SV=1	0	98.3	LAVVLEGEGEVQIVCPH	Carbamidomethyl(C)@15		cleaved H-L@C-term	0.0987711	1848.04	617.022	1847.95	616.989	3	20	8.1.1.5891.10	77.939	4998.72	4373.6	77.23	1.04	10224.2
2	18.26	18.26	18.21	tr|Q7DMU0	Storage protein OS=Triticum aestivum OX=4565 GN=Gbl1 PE=4 SV=1; Embryo globulin OS=Hordeum vulgare OX=4513 GN=Beg1 PE=2 SV=1	0	98.22	LAVVLEGEGEVQIVCPH	Carbamidomethyl(C)@15		cleaved H-L@C-term	0.0201987	1847.97	616.996	1847.95	616.989	3	19	5.1.1.6706.8	81.2904	27.9129	27.9129			5122.28
2	18.26	18.26	18.21	tr|Q7DMU0	Storage protein OS=Triticum aestivum OX=4565 GN=Gbl1 PE=4 SV=1; Embryo globulin OS=Hordeum vulgare OX=4513 GN=Beg1 PE=2 SV=1	0	98.22	LAVVLEGEGEVQIVCPH	Carbamidomethyl(C)@15		cleaved H-L@C-term	0.016537	1847.96	616.995	1847.95	616.989	3	18	5.1.1.6707.6	81.377	26.8894	26.8894			5166.53
2	18.26	18.26	18.21	tr|Q7DMU0	Storage protein OS=Triticum aestivum OX=4565 GN=Gbl1 PE=4 SV=1; Embryo globulin OS=Hordeum vulgare OX=4513 GN=Beg1 PE=2 SV=1	0	98.22	LAVVLEGEGEVQIVCPH	Carbamidomethyl(C)@15		cleaved H-L@C-term	0.0103121	1847.96	616.992	1847.95	616.989	3	16	5.1.1.6708.8	81.4802	27.2432	27.2432			5193.03
2	18.26	18.26	18.21	tr|Q7DMU0	Storage protein OS=Triticum aestivum OX=4565 GN=Gbl1 PE=4 SV=1; Embryo globulin OS=Hordeum vulgare OX=4513 GN=Beg1 PE=2 SV=1	0	98.22	LAVVLEGEGEVQIVCPH	Carbamidomethyl(C)@15		cleaved H-L@C-term	0.0123261	1847.96	616.993	1847.95	616.989	3	20	5.1.1.6709.9	81.5791	25.9074	25.9074			4873.77
2	18.26	18.26	18.21	tr|Q7DMU0	Storage protein OS=Triticum aestivum OX=4565 GN=Gbl1 PE=4 SV=1; Embryo globulin OS=Hordeum vulgare OX=4513 GN=Beg1 PE=2 SV=1	0	98.22	LAVVLEGEGEVQIVCPH	Carbamidomethyl(C)@15		cleaved H-L@C-term	0.00848129	1847.95	616.992	1847.95	616.989	3	21	5.1.1.6710.7	81.6659	24.5211	24.5211			4928.28
2	18.26	18.26	18.21	tr|Q7DMU0	Storage protein OS=Triticum aestivum OX=4565 GN=Gbl1 PE=4 SV=1; Embryo globulin OS=Hordeum vulgare OX=4513 GN=Beg1 PE=2 SV=1	0	98.22	LAVVLEGEGEVQIVCPH	Carbamidomethyl(C)@15		cleaved H-L@C-term	0.0136077	1847.96	616.994	1847.95	616.989	3	19	5.1.1.6711.7	81.7607	26.4687	26.4687			4697.52
2	18.26	18.26	18.21	tr|Q7DMU0	Storage protein OS=Triticum aestivum OX=4565 GN=Gbl1 PE=4 SV=1; Embryo globulin OS=Hordeum vulgare OX=4513 GN=Beg1 PE=2 SV=1	0	98.22	LAVVLEGEGEVQIVCPH	Carbamidomethyl(C)@15		cleaved H-L@C-term	-0.0166602	1847.93	924.971	1847.95	924.98	2	18	5.1.1.6728.21	83.4314	904.42	893.59	83.52	1.71	3522.23
2	18.26	18.26	18.21	tr|Q7DMU0	Storage protein OS=Triticum aestivum OX=4565 GN=Gbl1 PE=4 SV=1; Embryo globulin OS=Hordeum vulgare OX=4513 GN=Beg1 PE=2 SV=1	0	98.22	LAVVLEGEGEVQIVCPH	Carbamidomethyl(C)@15		cleaved H-L@C-term	0.0117768	1847.96	616.993	1847.95	616.989	3	18	5.1.1.6758.10	86.2344	1265.2	862.72	87.53	2.85	3676.24
2	18.26	18.26	18.21	tr|Q7DMU0	Storage protein OS=Triticum aestivum OX=4565 GN=Gbl1 PE=4 SV=1; Embryo globulin OS=Hordeum vulgare OX=4513 GN=Beg1 PE=2 SV=1	0	98.22	LAVVLEGEGEVQIVCPH	Carbamidomethyl(C)@15		cleaved H-L@C-term	-0.0105574	1847.93	924.975	1847.95	924.98	2	18	5.1.1.6759.20	86.371	831.58	476.88	85.52	2.28	2850.21
2	18.26	18.26	18.21	tr|Q7DMU0	Storage protein OS=Triticum aestivum OX=4565 GN=Gbl1 PE=4 SV=1; Embryo globulin OS=Hordeum vulgare OX=4513 GN=Beg1 PE=2 SV=1	0	98.22	LAVVLEGEGEVQIVCPH	Carbamidomethyl(C)@15		cleaved H-L@C-term	0.0117768	1847.96	616.993	1847.95	616.989	3	18	5.1.1.6760.8	86.416	1265.2	903.78	87.53	2.85	3801.24
2	18.26	18.26	18.21	tr|Q7DMU0	Storage protein OS=Triticum aestivum OX=4565 GN=Gbl1 PE=4 SV=1; Embryo globulin OS=Hordeum vulgare OX=4513 GN=Beg1 PE=2 SV=1	0	98.22	LAVVLEGEGEVQIVCPH	Carbamidomethyl(C)@15		cleaved H-L@C-term	0.0117768	1847.96	616.993	1847.95	616.989	3	20	5.1.1.6761.8	86.5109	1265.2	963.93	87.53	2.85	3816.24
2	18.26	18.26	18.21	tr|Q7DMU0	Storage protein OS=Triticum aestivum OX=4565 GN=Gbl1 PE=4 SV=1; Embryo globulin OS=Hordeum vulgare OX=4513 GN=Beg1 PE=2 SV=1	0	98.22	LAVVLEGEGEVQIVCPH	Carbamidomethyl(C)@15		cleaved H-L@C-term	0.0117768	1847.96	616.993	1847.95	616.989	3	19	5.1.1.6763.9	86.7053	1265.2	1071.03	87.53	2.85	3710.24
2	18.26	18.26	18.21	tr|Q7DMU0	Storage protein OS=Triticum aestivum OX=4565 GN=Gbl1 PE=4 SV=1; Embryo globulin OS=Hordeum vulgare OX=4513 GN=Beg1 PE=2 SV=1	0	98.22	LAVVLEGEGEVQIVCPH	Carbamidomethyl(C)@15		cleaved H-L@C-term	0.0117768	1847.96	616.993	1847.95	616.989	3	19	5.1.1.6764.8	86.7961	1265.2	1091.81	87.53	2.85	3747.49
2	18.26	18.26	18.21	tr|Q7DMU0	Storage protein OS=Triticum aestivum OX=4565 GN=Gbl1 PE=4 SV=1; Embryo globulin OS=Hordeum vulgare OX=4513 GN=Beg1 PE=2 SV=1	0	98.22	LAVVLEGEGEVQIVCPH	Carbamidomethyl(C)@15		cleaved H-L@C-term	0.0117768	1847.96	616.993	1847.95	616.989	3	20	5.1.1.6765.8	86.8913	1265.2	1113.57	87.53	2.85	3671.3
2	18.26	18.26	18.21	tr|Q7DMU0	Storage protein OS=Triticum aestivum OX=4565 GN=Gbl1 PE=4 SV=1; Embryo globulin OS=Hordeum vulgare OX=4513 GN=Beg1 PE=2 SV=1	0	98.22	LAVVLEGEGEVQIVCPH	Carbamidomethyl(C)@15		cleaved H-L@C-term	0.0117768	1847.96	616.993	1847.95	616.989	3	18	5.1.1.6766.11	86.9989	1265.2	1138.06	87.53	2.85	3711.74
2	18.26	18.26	18.21	tr|Q7DMU0	Storage protein OS=Triticum aestivum OX=4565 GN=Gbl1 PE=4 SV=1; Embryo globulin OS=Hordeum vulgare OX=4513 GN=Beg1 PE=2 SV=1	0	98.22	LAVVLEGEGEVQIVCPH	Carbamidomethyl(C)@15		cleaved H-L@C-term	0.0117768	1847.96	616.993	1847.95	616.989	3	19	5.1.1.6767.9	87.0855	1265.2	1157.65	87.53	2.85	3747.24
2	18.26	18.26	18.21	tr|Q7DMU0	Storage protein OS=Triticum aestivum OX=4565 GN=Gbl1 PE=4 SV=1; Embryo globulin OS=Hordeum vulgare OX=4513 GN=Beg1 PE=2 SV=1	0	98.22	LAVVLEGEGEVQIVCPH	Carbamidomethyl(C)@15		cleaved H-L@C-term	0.0117768	1847.96	616.993	1847.95	616.989	3	18	5.1.1.6768.8	87.1764	1265.2	1178.2	87.53	2.85	3710.24
2	18.26	18.26	18.21	tr|Q7DMU0	Storage protein OS=Triticum aestivum OX=4565 GN=Gbl1 PE=4 SV=1; Embryo globulin OS=Hordeum vulgare OX=4513 GN=Beg1 PE=2 SV=1	0	98.22	LAVVLEGEGEVQIVCPH	Carbamidomethyl(C)@15		cleaved H-L@C-term	0.0117768	1847.96	616.993	1847.95	616.989	3	18	5.1.1.6769.9	87.2756	1265.2	1201.93	87.53	2.85	3757.8
2	18.26	18.26	18.21	tr|Q7DMU0	Storage protein OS=Triticum aestivum OX=4565 GN=Gbl1 PE=4 SV=1; Embryo globulin OS=Hordeum vulgare OX=4513 GN=Beg1 PE=2 SV=1	0	98.22	LAVVLEGEGEVQIVCPH	Carbamidomethyl(C)@15		cleaved H-L@C-term	0.0117768	1847.96	616.993	1847.95	616.989	3	18	5.1.1.6770.11	87.379	1265.2	1228.6	87.53	2.85	3756.49
2	18.26	18.26	18.21	tr|Q7DMU0	Storage protein OS=Triticum aestivum OX=4565 GN=Gbl1 PE=4 SV=1; Embryo globulin OS=Hordeum vulgare OX=4513 GN=Beg1 PE=2 SV=1	0	98.22	LAVVLEGEGEVQIVCPH	Carbamidomethyl(C)@15		cleaved H-L@C-term	0.0117768	1847.96	616.993	1847.95	616.989	3	21	5.1.1.6771.10	87.4699	1265.2	1252.07	87.53	2.85	3897.06
2	18.26	18.26	18.21	tr|Q7DMU0	Storage protein OS=Triticum aestivum OX=4565 GN=Gbl1 PE=4 SV=1; Embryo globulin OS=Hordeum vulgare OX=4513 GN=Beg1 PE=2 SV=1	0	98.22	LAVVLEGEGEVQIVCPH	Carbamidomethyl(C)@15		cleaved H-L@C-term	0.0117768	1847.96	616.993	1847.95	616.989	3	18	5.1.1.6772.6	87.5484	1265.2	1255.67	87.53	2.85	4141.25
2	18.26	18.26	18.21	tr|Q7DMU0	Storage protein OS=Triticum aestivum OX=4565 GN=Gbl1 PE=4 SV=1; Embryo globulin OS=Hordeum vulgare OX=4513 GN=Beg1 PE=2 SV=1	0	98.22	LAVVLEGEGEVQIVCPH	Carbamidomethyl(C)@15		cleaved H-L@C-term	0.0117768	1847.96	616.993	1847.95	616.989	3	18	5.1.1.6773.8	87.6519	1265.2	1219.92	87.53	2.85	4206.76
2	18.26	18.26	18.21	tr|Q7DMU0	Storage protein OS=Triticum aestivum OX=4565 GN=Gbl1 PE=4 SV=1; Embryo globulin OS=Hordeum vulgare OX=4513 GN=Beg1 PE=2 SV=1	0	98.22	LAVVLEGEGEVQIVCPH	Carbamidomethyl(C)@15		cleaved H-L@C-term	0.0117768	1847.96	616.993	1847.95	616.989	3	21	5.1.1.6774.8	87.7469	1265.2	1187.07	87.53	2.85	4455.51
2	18.26	18.26	18.21	tr|Q7DMU0	Storage protein OS=Triticum aestivum OX=4565 GN=Gbl1 PE=4 SV=1; Embryo globulin OS=Hordeum vulgare OX=4513 GN=Beg1 PE=2 SV=1	0	98.22	LAVVLEGEGEVQIVCPH	Carbamidomethyl(C)@15		cleaved H-L@C-term	0.0117768	1847.96	616.993	1847.95	616.989	3	20	5.1.1.6775.8	87.8421	1265.2	1174.04	87.53	2.85	4828.52
2	18.26	18.26	18.21	tr|Q7DMU0	Storage protein OS=Triticum aestivum OX=4565 GN=Gbl1 PE=4 SV=1; Embryo globulin OS=Hordeum vulgare OX=4513 GN=Beg1 PE=2 SV=1	0	98.22	LAVVLEGEGEVQIVCPH	Carbamidomethyl(C)@15		cleaved H-L@C-term	0.0117768	1847.96	616.993	1847.95	616.989	3	19	5.1.1.6776.8	87.9372	1265.2	1193.74	87.53	2.85	5115.03
2	18.26	18.26	18.21	tr|Q7DMU0	Storage protein OS=Triticum aestivum OX=4565 GN=Gbl1 PE=4 SV=1; Embryo globulin OS=Hordeum vulgare OX=4513 GN=Beg1 PE=2 SV=1	0	98.22	LAVVLEGEGEVQIVCPH	Carbamidomethyl(C)@15		cleaved H-L@C-term	0.0117768	1847.96	616.993	1847.95	616.989	3	20	5.1.1.6777.6	88.0238	1265.2	1211.68	87.53	2.85	5502.04
2	18.26	18.26	18.21	tr|Q7DMU0	Storage protein OS=Triticum aestivum OX=4565 GN=Gbl1 PE=4 SV=1; Embryo globulin OS=Hordeum vulgare OX=4513 GN=Beg1 PE=2 SV=1	0	98.22	LAVVLEGEGEVQIVCPH	Carbamidomethyl(C)@15		cleaved H-L@C-term	0.0117768	1847.96	616.993	1847.95	616.989	3	20	5.1.1.6778.8	88.1271	1265.2	1201.51	87.53	2.85	5405.04
2	18.26	18.26	18.21	tr|Q7DMU0	Storage protein OS=Triticum aestivum OX=4565 GN=Gbl1 PE=4 SV=1; Embryo globulin OS=Hordeum vulgare OX=4513 GN=Beg1 PE=2 SV=1	0	98.22	LAVVLEGEGEVQIVCPH	Carbamidomethyl(C)@15		cleaved H-L@C-term	0.0117768	1847.96	616.993	1847.95	616.989	3	21	5.1.1.6779.8	88.2222	1265.2	1137.36	87.53	2.85	5427.54
2	18.26	18.26	18.21	tr|Q7DMU0	Storage protein OS=Triticum aestivum OX=4565 GN=Gbl1 PE=4 SV=1; Embryo globulin OS=Hordeum vulgare OX=4513 GN=Beg1 PE=2 SV=1	0	98.22	LAVVLEGEGEVQIVCPH	Carbamidomethyl(C)@15		cleaved H-L@C-term	0.0117768	1847.96	616.993	1847.95	616.989	3	19	5.1.1.6780.8	88.3173	1265.2	1073.29	87.53	2.85	5029.53
2	18.26	18.26	18.21	tr|Q7DMU0	Storage protein OS=Triticum aestivum OX=4565 GN=Gbl1 PE=4 SV=1; Embryo globulin OS=Hordeum vulgare OX=4513 GN=Beg1 PE=2 SV=1	0	98.22	LAVVLEGEGEVQIVCPH	Carbamidomethyl(C)@15		cleaved H-L@C-term	0.0117768	1847.96	616.993	1847.95	616.989	3	18	5.1.1.6781.8	88.4122	1265.2	1026.5	87.53	2.85	4894.28
2	18.26	18.26	18.21	tr|Q7DMU0	Storage protein OS=Triticum aestivum OX=4565 GN=Gbl1 PE=4 SV=1; Embryo globulin OS=Hordeum vulgare OX=4513 GN=Beg1 PE=2 SV=1	0	98.22	LAVVLEGEGEVQIVCPH	Carbamidomethyl(C)@15		cleaved H-L@C-term	0.0117768	1847.96	616.993	1847.95	616.989	3	19	5.1.1.6782.8	88.5071	1265.2	1008.33	87.53	2.85	4894.03
2	18.26	18.26	18.21	tr|Q7DMU0	Storage protein OS=Triticum aestivum OX=4565 GN=Gbl1 PE=4 SV=1; Embryo globulin OS=Hordeum vulgare OX=4513 GN=Beg1 PE=2 SV=1	0	98.22	LAVVLEGEGEVQIVCPH	Carbamidomethyl(C)@15		cleaved H-L@C-term	-0.00836044	1847.94	924.976	1847.95	924.98	2	19	5.1.1.6783.20	88.6522	953	782.94	88.94	1.71	3779.49
2	18.26	18.26	18.21	tr|Q7DMU0	Storage protein OS=Triticum aestivum OX=4565 GN=Gbl1 PE=4 SV=1; Embryo globulin OS=Hordeum vulgare OX=4513 GN=Beg1 PE=2 SV=1	0	98.22	LAVVLEGEGEVQIVCPH	Carbamidomethyl(C)@15		cleaved H-L@C-term	-0.00836044	1847.94	924.976	1847.95	924.98	2	19	5.1.1.6784.20	88.7472	953	834.22	88.94	1.71	3835.18
2	18.26	18.26	18.21	tr|Q7DMU0	Storage protein OS=Triticum aestivum OX=4565 GN=Gbl1 PE=4 SV=1; Embryo globulin OS=Hordeum vulgare OX=4513 GN=Beg1 PE=2 SV=1	0	98.22	LAVVLEGEGEVQIVCPH	Carbamidomethyl(C)@15		cleaved H-L@C-term	0.0117768	1847.96	616.993	1847.95	616.989	3	21	5.1.1.6785.7	88.7878	1265.2	980.78	87.53	2.85	4863.52
2	18.26	18.26	18.21	tr|Q7DMU0	Storage protein OS=Triticum aestivum OX=4565 GN=Gbl1 PE=4 SV=1; Embryo globulin OS=Hordeum vulgare OX=4513 GN=Beg1 PE=2 SV=1	0	98.22	LAVVLEGEGEVQIVCPH	Carbamidomethyl(C)@15		cleaved H-L@C-term	0.0117768	1847.96	616.993	1847.95	616.989	3	18	5.1.1.6786.7	88.8828	1265.2	982.27	87.53	2.85	4913.03
2	18.26	18.26	18.21	tr|Q7DMU0	Storage protein OS=Triticum aestivum OX=4565 GN=Gbl1 PE=4 SV=1; Embryo globulin OS=Hordeum vulgare OX=4513 GN=Beg1 PE=2 SV=1	0	98.22	LAVVLEGEGEVQIVCPH	Carbamidomethyl(C)@15		cleaved H-L@C-term	-0.00836044	1847.94	924.976	1847.95	924.98	2	19	5.1.1.6787.21	89.0361	953	895.68	88.94	1.71	3946.24
2	18.26	18.26	18.21	tr|Q7DMU0	Storage protein OS=Triticum aestivum OX=4565 GN=Gbl1 PE=4 SV=1; Embryo globulin OS=Hordeum vulgare OX=4513 GN=Beg1 PE=2 SV=1	0	98.22	LAVVLEGEGEVQIVCPH	Carbamidomethyl(C)@15		cleaved H-L@C-term	0.0126922	1847.96	616.993	1847.95	616.989	3	18	5.1.1.6788.10	89.0849	1316.39	1072.73	89.79	2.84	4795.77
2	18.26	18.26	18.21	tr|Q7DMU0	Storage protein OS=Triticum aestivum OX=4565 GN=Gbl1 PE=4 SV=1; Embryo globulin OS=Hordeum vulgare OX=4513 GN=Beg1 PE=2 SV=1	0	98.22	LAVVLEGEGEVQIVCPH	Carbamidomethyl(C)@15		cleaved H-L@C-term	0.0126922	1847.96	616.993	1847.95	616.989	3	21	5.1.1.6789.9	89.1757	1316.39	1131.19	89.79	2.84	4857.2
2	18.26	18.26	18.21	tr|Q7DMU0	Storage protein OS=Triticum aestivum OX=4565 GN=Gbl1 PE=4 SV=1; Embryo globulin OS=Hordeum vulgare OX=4513 GN=Beg1 PE=2 SV=1	0	98.22	LAVVLEGEGEVQIVCPH	Carbamidomethyl(C)@15		cleaved H-L@C-term	0.0126922	1847.96	616.993	1847.95	616.989	3	21	5.1.1.6790.8	89.2664	1316.39	1185.48	89.79	2.84	4803.83
2	18.26	18.26	18.21	tr|Q7DMU0	Storage protein OS=Triticum aestivum OX=4565 GN=Gbl1 PE=4 SV=1; Embryo globulin OS=Hordeum vulgare OX=4513 GN=Beg1 PE=2 SV=1	0	98.22	LAVVLEGEGEVQIVCPH	Carbamidomethyl(C)@15		cleaved H-L@C-term	0.0126922	1847.96	616.993	1847.95	616.989	3	20	5.1.1.6791.8	89.3612	1316.39	1235.36	89.79	2.84	4709.02
2	18.26	18.26	18.21	tr|Q7DMU0	Storage protein OS=Triticum aestivum OX=4565 GN=Gbl1 PE=4 SV=1; Embryo globulin OS=Hordeum vulgare OX=4513 GN=Beg1 PE=2 SV=1	0	98.22	LAVVLEGEGEVQIVCPH	Carbamidomethyl(C)@15		cleaved H-L@C-term	0.0126922	1847.96	616.993	1847.95	616.989	3	19	5.1.1.6793.9	89.5552	1316.39	1309.03	89.79	2.84	4681.52
2	18.26	18.26	18.21	tr|Q7DMU0	Storage protein OS=Triticum aestivum OX=4565 GN=Gbl1 PE=4 SV=1; Embryo globulin OS=Hordeum vulgare OX=4513 GN=Beg1 PE=2 SV=1	0	98.22	LAVVLEGEGEVQIVCPH	Carbamidomethyl(C)@15		cleaved H-L@C-term	0.0126922	1847.96	616.993	1847.95	616.989	3	20	5.1.1.6795.11	89.7532	1316.39	1272.58	89.79	2.84	4583.01
2	18.26	18.26	18.21	tr|Q7DMU0	Storage protein OS=Triticum aestivum OX=4565 GN=Gbl1 PE=4 SV=1; Embryo globulin OS=Hordeum vulgare OX=4513 GN=Beg1 PE=2 SV=1	0	98.22	LAVVLEGEGEVQIVCPH	Carbamidomethyl(C)@15		cleaved H-L@C-term	0.0126922	1847.96	616.993	1847.95	616.989	3	19	5.1.1.6797.8	89.93	1316.39	1212.31	89.79	2.84	4484.26
2	18.26	18.26	18.21	tr|Q7DMU0	Storage protein OS=Triticum aestivum OX=4565 GN=Gbl1 PE=4 SV=1; Embryo globulin OS=Hordeum vulgare OX=4513 GN=Beg1 PE=2 SV=1	0	98.22	LAVVLEGEGEVQIVCPH	Carbamidomethyl(C)@15		cleaved H-L@C-term	0.0126922	1847.96	616.993	1847.95	616.989	3	19	5.1.1.6798.11	90.037	1316.39	1169.84	89.79	2.84	4280.51
2	18.26	18.26	18.21	tr|Q7DMU0	Storage protein OS=Triticum aestivum OX=4565 GN=Gbl1 PE=4 SV=1; Embryo globulin OS=Hordeum vulgare OX=4513 GN=Beg1 PE=2 SV=1	0	98.22	LAVVLEGEGEVQIVCPH	Carbamidomethyl(C)@15		cleaved H-L@C-term	0.0126922	1847.96	616.993	1847.95	616.989	3	18	5.1.1.6799.9	90.1234	1316.39	1136.54	89.79	2.84	4137.32
2	18.26	18.26	18.21	tr|Q7DMU0	Storage protein OS=Triticum aestivum OX=4565 GN=Gbl1 PE=4 SV=1; Embryo globulin OS=Hordeum vulgare OX=4513 GN=Beg1 PE=2 SV=1	0	98.22	LAVVLEGEGEVQIVCPH	Carbamidomethyl(C)@15		cleaved H-L@C-term	0.0126922	1847.96	616.993	1847.95	616.989	3	17	5.1.1.6804.8	90.5915	1316.39	920.19	89.79	2.84	3872.24
2	18.26	18.26	18.21	tr|Q7DMU0	Storage protein OS=Triticum aestivum OX=4565 GN=Gbl1 PE=4 SV=1; Embryo globulin OS=Hordeum vulgare OX=4513 GN=Beg1 PE=2 SV=1	0	98.22	LAVVLEGEGEVQIVCPH	Carbamidomethyl(C)@15		cleaved H-L@C-term	0.0126922	1847.96	616.993	1847.95	616.989	3	18	5.1.1.6805.10	90.6941	1316.39	864.07	89.79	2.84	3921.25
2	18.26	18.26	18.21	tr|Q7DMU0	Storage protein OS=Triticum aestivum OX=4565 GN=Gbl1 PE=4 SV=1; Embryo globulin OS=Hordeum vulgare OX=4513 GN=Beg1 PE=2 SV=1	0	98.22	LAVVLEGEGEVQIVCPH	Carbamidomethyl(C)@15		cleaved H-L@C-term	-0.0120221	1847.93	924.974	1847.95	924.98	2	21	5.1.1.7939.20	109.273	1654.73	1629.78	109.2	0.85	8187.38
2	18.26	18.26	18.21	tr|Q7DMU0	Storage protein OS=Triticum aestivum OX=4565 GN=Gbl1 PE=4 SV=1; Embryo globulin OS=Hordeum vulgare OX=4513 GN=Beg1 PE=2 SV=1	0	98.22	LAVVLEGEGEVQIVCPH	Carbamidomethyl(C)@15		cleaved H-L@C-term	0.0104952	1847.96	616.992	1847.95	616.989	3	18	5.1.1.7946.6	109.877	24.6744	24.6744			3225.22
2	18.26	18.26	18.21	tr|Q7DMU0	Storage protein OS=Triticum aestivum OX=4565 GN=Gbl1 PE=4 SV=1; Embryo globulin OS=Hordeum vulgare OX=4513 GN=Beg1 PE=2 SV=1	0	97.59	LAVVLEGEGEVQIVCPH	Carbamidomethyl(C)@15		cleaved H-L@C-term	0.0978556	1848.04	617.022	1847.95	616.989	3	23	8.1.1.5691.7	58.9857	32342.7	28910.6	59.43	1.7	54893.6
2	18.26	18.26	18.21	tr|Q7DMU0	Storage protein OS=Triticum aestivum OX=4565 GN=Gbl1 PE=4 SV=1; Embryo globulin OS=Hordeum vulgare OX=4513 GN=Beg1 PE=2 SV=1	0	97.33	LAVVLEGEGEVQIVCPH	Carbamidomethyl(C)@15		cleaved H-L@C-term	0.0974894	1848.04	617.021	1847.95	616.989	3	22	8.1.1.5761.4	65.5981	9466.32	9095.36	65.2	0.95	19423.2
2	18.26	18.26	18.21	tr|Q7DMU0	Storage protein OS=Triticum aestivum OX=4565 GN=Gbl1 PE=4 SV=1; Embryo globulin OS=Hordeum vulgare OX=4513 GN=Beg1 PE=2 SV=1	0	96.96	LAVVLEGEGEVQIVCPH	Carbamidomethyl(C)@15		cleaved H-L@C-term	0.153886	1848.1	617.04	1847.95	616.989	3	12	4.1.1.2781.7	72.6071	895.68	822.68	72.69	1.43	4471.26
2	18.26	18.26	18.21	tr|Q7DMU0	Storage protein OS=Triticum aestivum OX=4565 GN=Gbl1 PE=4 SV=1; Embryo globulin OS=Hordeum vulgare OX=4513 GN=Beg1 PE=2 SV=1	0	96.96	LAVVLEGEGEVQIVCPH	Carbamidomethyl(C)@15		cleaved H-L@C-term	0.157914	1848.1	617.042	1847.95	616.989	3	10	4.1.1.2853.7	79.452	619.43	612.58	79.5	2	3148.22
2	18.26	18.26	18.21	tr|Q7DMU0	Storage protein OS=Triticum aestivum OX=4565 GN=Gbl1 PE=4 SV=1; Embryo globulin OS=Hordeum vulgare OX=4513 GN=Beg1 PE=2 SV=1	0	96.96	LAVVLEGEGEVQIVCPH	Carbamidomethyl(C)@15		cleaved H-L@C-term	0.157914	1848.1	617.042	1847.95	616.989	3	11	4.1.1.2862.8	80.3114	619.43	388.93	79.5	2	3405.23
2	18.26	18.26	18.21	tr|Q7DMU0	Storage protein OS=Triticum aestivum OX=4565 GN=Gbl1 PE=4 SV=1; Embryo globulin OS=Hordeum vulgare OX=4513 GN=Beg1 PE=2 SV=1	0	96.96	LAVVLEGEGEVQIVCPH	Carbamidomethyl(C)@15		cleaved H-L@C-term	0.157914	1848.1	617.042	1847.95	616.989	3	12	4.1.1.2863.10	80.4148	619.43	373.26	79.5	2	3184.22
2	18.26	18.26	18.21	tr|Q7DMU0	Storage protein OS=Triticum aestivum OX=4565 GN=Gbl1 PE=4 SV=1; Embryo globulin OS=Hordeum vulgare OX=4513 GN=Beg1 PE=2 SV=1	0	96.96	LAVVLEGEGEVQIVCPH	Carbamidomethyl(C)@15		cleaved H-L@C-term	0.157914	1848.1	617.042	1847.95	616.989	3	12	4.1.1.2864.8	80.5015	619.43	382.36	79.5	2	3416.23
2	18.26	18.26	18.21	tr|Q7DMU0	Storage protein OS=Triticum aestivum OX=4565 GN=Gbl1 PE=4 SV=1; Embryo globulin OS=Hordeum vulgare OX=4513 GN=Beg1 PE=2 SV=1	0	96.76	LAVVLEGEGEVQIVCPH	Carbamidomethyl(C)@15		cleaved H-L@C-term	0.116363	1848.06	925.038	1847.95	924.98	2	21	5.1.1.6483.21	60.2019	110.235	110.235			32700.1
2	18.26	18.26	18.21	tr|Q7DMU0	Storage protein OS=Triticum aestivum OX=4565 GN=Gbl1 PE=4 SV=1; Embryo globulin OS=Hordeum vulgare OX=4513 GN=Beg1 PE=2 SV=1	0	96.76	LAVVLEGEGEVQIVCPH	Carbamidomethyl(C)@15		cleaved H-L@C-term	0.11856	1848.06	925.039	1847.95	924.98	2	21	5.1.1.6488.19	60.6679	124.548	124.548			35074.4
2	18.26	18.26	18.21	tr|Q7DMU0	Storage protein OS=Triticum aestivum OX=4565 GN=Gbl1 PE=4 SV=1; Embryo globulin OS=Hordeum vulgare OX=4513 GN=Beg1 PE=2 SV=1	0	96.11	LAVVLEGEGEVQIVCPH	Carbamidomethyl(C)@15		cleaved H-L@C-term	0.0978556	1848.04	617.022	1847.95	616.989	3	23	8.1.1.5689.7	58.7963	32342.7	28533.5	59.43	1.7	55521.1
2	18.26	18.26	18.21	tr|Q7DMU0	Storage protein OS=Triticum aestivum OX=4565 GN=Gbl1 PE=4 SV=1; Embryo globulin OS=Hordeum vulgare OX=4513 GN=Beg1 PE=2 SV=1	0	96.07	LAVVLEGEGEVQIVCPH	Carbamidomethyl(C)@15		cleaved H-L@C-term	0.0126922	1847.96	616.993	1847.95	616.989	3	16	5.1.1.6801.11	90.321	1316.39	1063.12	89.79	2.84	3983.25
2	18.26	18.26	18.21	tr|Q7DMU0	Storage protein OS=Triticum aestivum OX=4565 GN=Gbl1 PE=4 SV=1; Embryo globulin OS=Hordeum vulgare OX=4513 GN=Beg1 PE=2 SV=1	0	95.8	LAVVLEGEGEVQIVCPH	Carbamidomethyl(C)@15		cleaved H-L@C-term	0.0974894	1848.04	617.021	1847.95	616.989	3	21	8.1.1.5745.3	64.0807	10526.4	9125.02	64.54	1.04	18070.7
2	18.26	18.26	18.21	tr|Q7DMU0	Storage protein OS=Triticum aestivum OX=4565 GN=Gbl1 PE=4 SV=1; Embryo globulin OS=Hordeum vulgare OX=4513 GN=Beg1 PE=2 SV=1	0	95.8	LAVVLEGEGEVQIVCPH	Carbamidomethyl(C)@15		cleaved H-L@C-term	0.0974894	1848.04	617.021	1847.95	616.989	3	21	8.1.1.5754.5	64.9395	10526.4	8557.45	64.54	1.04	19051.5
2	18.26	18.26	18.21	tr|Q7DMU0	Storage protein OS=Triticum aestivum OX=4565 GN=Gbl1 PE=4 SV=1; Embryo globulin OS=Hordeum vulgare OX=4513 GN=Beg1 PE=2 SV=1	0	95.8	LAVVLEGEGEVQIVCPH	Carbamidomethyl(C)@15		cleaved H-L@C-term	0.0974894	1848.04	617.021	1847.95	616.989	3	21	8.1.1.5760.5	65.5074	9466.32	9311.73	65.2	0.95	19022.7
2	18.26	18.26	18.21	tr|Q7DMU0	Storage protein OS=Triticum aestivum OX=4565 GN=Gbl1 PE=4 SV=1; Embryo globulin OS=Hordeum vulgare OX=4513 GN=Beg1 PE=2 SV=1	0	95.8	LAVVLEGEGEVQIVCPH	Carbamidomethyl(C)@15		cleaved H-L@C-term	0.0974894	1848.04	617.021	1847.95	616.989	3	21	8.1.1.5762.4	65.6927	9466.32	8613.93	65.2	0.95	18787
2	18.26	18.26	18.21	tr|Q7DMU0	Storage protein OS=Triticum aestivum OX=4565 GN=Gbl1 PE=4 SV=1; Embryo globulin OS=Hordeum vulgare OX=4513 GN=Beg1 PE=2 SV=1	0	95.8	LAVVLEGEGEVQIVCPH	Carbamidomethyl(C)@15		cleaved H-L@C-term	0.0974894	1848.04	617.021	1847.95	616.989	3	21	8.1.1.5763.4	65.7872	9466.32	7830.41	65.2	0.95	18231.2
2	18.26	18.26	18.21	tr|Q7DMU0	Storage protein OS=Triticum aestivum OX=4565 GN=Gbl1 PE=4 SV=1; Embryo globulin OS=Hordeum vulgare OX=4513 GN=Beg1 PE=2 SV=1	0	95.8	LAVVLEGEGEVQIVCPH	Carbamidomethyl(C)@15		cleaved H-L@C-term	0.0963908	1848.04	617.021	1847.95	616.989	3	21	8.1.1.5776.6	67.0207	8205.47	7640.98	67.37	1.23	21108.8
2	18.26	18.26	18.21	tr|Q7DMU0	Storage protein OS=Triticum aestivum OX=4565 GN=Gbl1 PE=4 SV=1; Embryo globulin OS=Hordeum vulgare OX=4513 GN=Beg1 PE=2 SV=1	0	95.8	LAVVLEGEGEVQIVCPH	Carbamidomethyl(C)@15		cleaved H-L@C-term	0.0963908	1848.04	617.021	1847.95	616.989	3	22	8.1.1.5784.5	67.7733	8205.47	7596.41	67.37	1.23	18299.6
2	18.26	18.26	18.21	tr|Q7DMU0	Storage protein OS=Triticum aestivum OX=4565 GN=Gbl1 PE=4 SV=1; Embryo globulin OS=Hordeum vulgare OX=4513 GN=Beg1 PE=2 SV=1	0	95.8	LAVVLEGEGEVQIVCPH	Carbamidomethyl(C)@15		cleaved H-L@C-term	0.0963908	1848.04	617.021	1847.95	616.989	3	22	8.1.1.5785.6	67.8725	8205.47	7424.07	67.37	1.23	17902.9
2	18.26	18.26	18.21	tr|Q7DMU0	Storage protein OS=Triticum aestivum OX=4565 GN=Gbl1 PE=4 SV=1; Embryo globulin OS=Hordeum vulgare OX=4513 GN=Beg1 PE=2 SV=1	0	95.8	LAVVLEGEGEVQIVCPH	Carbamidomethyl(C)@15		cleaved H-L@C-term	0.0963908	1848.04	617.021	1847.95	616.989	3	21	8.1.1.5786.5	67.9628	8205.47	7401.16	67.37	1.23	17503.7
2	18.26	18.26	18.21	tr|Q7DMU0	Storage protein OS=Triticum aestivum OX=4565 GN=Gbl1 PE=4 SV=1; Embryo globulin OS=Hordeum vulgare OX=4513 GN=Beg1 PE=2 SV=1	0	95.8	LAVVLEGEGEVQIVCPH	Carbamidomethyl(C)@15		cleaved H-L@C-term	0.0998698	1848.05	617.022	1847.95	616.989	3	21	8.1.1.5793.7	68.634	7927.7	6819.1	68.41	0.47	15831.1
2	18.26	18.26	18.21	tr|Q7DMU0	Storage protein OS=Triticum aestivum OX=4565 GN=Gbl1 PE=4 SV=1; Embryo globulin OS=Hordeum vulgare OX=4513 GN=Beg1 PE=2 SV=1	0	95.8	LAVVLEGEGEVQIVCPH	Carbamidomethyl(C)@15		cleaved H-L@C-term	0.0978556	1848.04	617.022	1847.95	616.989	3	22	8.1.1.5801.5	69.3835	7789.64	7283.74	70.02	1.52	16564.1
2	18.26	18.26	18.21	tr|Q7DMU0	Storage protein OS=Triticum aestivum OX=4565 GN=Gbl1 PE=4 SV=1; Embryo globulin OS=Hordeum vulgare OX=4513 GN=Beg1 PE=2 SV=1	0	95.8	LAVVLEGEGEVQIVCPH	Carbamidomethyl(C)@15		cleaved H-L@C-term	0.0978556	1848.04	617.022	1847.95	616.989	3	20	8.1.1.5811.5	70.3316	7789.64	7128.5	70.02	1.52	15003.1
2	18.26	18.26	18.21	tr|Q7DMU0	Storage protein OS=Triticum aestivum OX=4565 GN=Gbl1 PE=4 SV=1; Embryo globulin OS=Hordeum vulgare OX=4513 GN=Beg1 PE=2 SV=1	0	95.8	LAVVLEGEGEVQIVCPH	Carbamidomethyl(C)@15		cleaved H-L@C-term	0.0978556	1848.04	617.022	1847.95	616.989	3	21	8.1.1.5812.7	70.4346	7789.64	6989.74	70.02	1.52	14718.6
2	18.26	18.26	18.21	tr|Q7DMU0	Storage protein OS=Triticum aestivum OX=4565 GN=Gbl1 PE=4 SV=1; Embryo globulin OS=Hordeum vulgare OX=4513 GN=Beg1 PE=2 SV=1	0	95.8	LAVVLEGEGEVQIVCPH	Carbamidomethyl(C)@15		cleaved H-L@C-term	0.0998698	1848.05	617.022	1847.95	616.989	3	22	8.1.1.5819.7	71.0978	7390.19	7029.35	70.97	1.42	14500.6
2	18.26	18.26	18.21	tr|Q7DMU0	Storage protein OS=Triticum aestivum OX=4565 GN=Gbl1 PE=4 SV=1; Embryo globulin OS=Hordeum vulgare OX=4513 GN=Beg1 PE=2 SV=1	0	95.8	LAVVLEGEGEVQIVCPH	Carbamidomethyl(C)@15		cleaved H-L@C-term	0.11917	1848.06	925.039	1847.95	924.98	2	19	8.1.1.5824.21	71.6303	4741.46	4735.64	71.54	1.42	13356.8
2	18.26	18.26	18.21	tr|Q7DMU0	Storage protein OS=Triticum aestivum OX=4565 GN=Gbl1 PE=4 SV=1; Embryo globulin OS=Hordeum vulgare OX=4513 GN=Beg1 PE=2 SV=1	0	95.8	LAVVLEGEGEVQIVCPH	Carbamidomethyl(C)@15		cleaved H-L@C-term	0.0998698	1848.05	617.022	1847.95	616.989	3	22	8.1.1.5825.7	71.6665	7390.19	6716.58	70.97	1.42	14647.1
2	18.26	18.26	18.21	tr|Q7DMU0	Storage protein OS=Triticum aestivum OX=4565 GN=Gbl1 PE=4 SV=1; Embryo globulin OS=Hordeum vulgare OX=4513 GN=Beg1 PE=2 SV=1	0	95.8	LAVVLEGEGEVQIVCPH	Carbamidomethyl(C)@15		cleaved H-L@C-term	0.0998698	1848.05	617.022	1847.95	616.989	3	19	8.1.1.5826.5	71.7529	7390.19	6321.8	70.97	1.42	14817.6
2	18.26	18.26	18.21	tr|Q7DMU0	Storage protein OS=Triticum aestivum OX=4565 GN=Gbl1 PE=4 SV=1; Embryo globulin OS=Hordeum vulgare OX=4513 GN=Beg1 PE=2 SV=1	0	95.8	LAVVLEGEGEVQIVCPH	Carbamidomethyl(C)@15		cleaved H-L@C-term	0.0998698	1848.05	617.022	1847.95	616.989	3	20	8.1.1.5827.7	71.8563	7390.19	6058.92	70.97	1.42	14633.8
2	18.26	18.26	18.21	tr|Q7DMU0	Storage protein OS=Triticum aestivum OX=4565 GN=Gbl1 PE=4 SV=1; Embryo globulin OS=Hordeum vulgare OX=4513 GN=Beg1 PE=2 SV=1	0	95.8	LAVVLEGEGEVQIVCPH	Carbamidomethyl(C)@15		cleaved H-L@C-term	0.0974894	1848.04	617.021	1847.95	616.989	3	21	8.1.1.5836.7	72.7101	6659.18	6249.46	72.87	1.14	14076.8
2	18.26	18.26	18.21	tr|Q7DMU0	Storage protein OS=Triticum aestivum OX=4565 GN=Gbl1 PE=4 SV=1; Embryo globulin OS=Hordeum vulgare OX=4513 GN=Beg1 PE=2 SV=1	0	95.8	LAVVLEGEGEVQIVCPH	Carbamidomethyl(C)@15		cleaved H-L@C-term	0.0978556	1848.04	617.022	1847.95	616.989	3	20	8.1.1.5857.8	74.7066	6027.21	5672.1	74.96	1.14	12248.8
2	18.26	18.26	18.21	tr|Q7DMU0	Storage protein OS=Triticum aestivum OX=4565 GN=Gbl1 PE=4 SV=1; Embryo globulin OS=Hordeum vulgare OX=4513 GN=Beg1 PE=2 SV=1	0	95.8	LAVVLEGEGEVQIVCPH	Carbamidomethyl(C)@15		cleaved H-L@C-term	0.0978556	1848.04	617.022	1847.95	616.989	3	20	8.1.1.5862.6	75.1721	6027.21	5889.57	74.96	1.14	12772.8
2	18.26	18.26	18.21	tr|Q7DMU0	Storage protein OS=Triticum aestivum OX=4565 GN=Gbl1 PE=4 SV=1; Embryo globulin OS=Hordeum vulgare OX=4513 GN=Beg1 PE=2 SV=1	0	95.8	LAVVLEGEGEVQIVCPH	Carbamidomethyl(C)@15		cleaved H-L@C-term	0.0978556	1848.04	617.022	1847.95	616.989	3	21	8.1.1.5864.8	75.3698	6027.21	5390.64	74.96	1.14	11991.2
2	18.26	18.26	18.21	tr|Q7DMU0	Storage protein OS=Triticum aestivum OX=4565 GN=Gbl1 PE=4 SV=1; Embryo globulin OS=Hordeum vulgare OX=4513 GN=Beg1 PE=2 SV=1	0	95.8	LAVVLEGEGEVQIVCPH	Carbamidomethyl(C)@15		cleaved H-L@C-term	0.0996867	1848.04	617.022	1847.95	616.989	3	21	8.1.1.5873.7	76.2192	5490.31	5449.94	76.28	0.95	12433.5
2	18.26	18.26	18.21	tr|Q7DMU0	Storage protein OS=Triticum aestivum OX=4565 GN=Gbl1 PE=4 SV=1; Embryo globulin OS=Hordeum vulgare OX=4513 GN=Beg1 PE=2 SV=1	0	95.8	LAVVLEGEGEVQIVCPH	Carbamidomethyl(C)@15		cleaved H-L@C-term	0.0987711	1848.04	617.022	1847.95	616.989	3	21	8.1.1.5890.8	77.8359	4998.72	4373.2	77.23	1.04	10113.7
2	18.26	18.26	18.21	tr|Q7DMU0	Storage protein OS=Triticum aestivum OX=4565 GN=Gbl1 PE=4 SV=1; Embryo globulin OS=Hordeum vulgare OX=4513 GN=Beg1 PE=2 SV=1	0	93.44	LAVVLEGEGEVQIVCPH	Carbamidomethyl(C)@15		cleaved H-L@C-term	0.0956583	1848.04	617.021	1847.95	616.989	3	20	8.1.1.5744.5	63.9947	9392.79	8961.53	63.69	1.23	17942.4
2	18.26	18.26	18.21	tr|Q7DMU0	Storage protein OS=Triticum aestivum OX=4565 GN=Gbl1 PE=4 SV=1; Embryo globulin OS=Hordeum vulgare OX=4513 GN=Beg1 PE=2 SV=1	0	93.44	LAVVLEGEGEVQIVCPH	Carbamidomethyl(C)@15		cleaved H-L@C-term	0.0974894	1848.04	617.021	1847.95	616.989	3	19	8.1.1.5747.5	64.2776	10526.4	8976.04	64.54	1.04	18383.9
2	18.26	18.26	18.21	tr|Q7DMU0	Storage protein OS=Triticum aestivum OX=4565 GN=Gbl1 PE=4 SV=1; Embryo globulin OS=Hordeum vulgare OX=4513 GN=Beg1 PE=2 SV=1	0	93.44	LAVVLEGEGEVQIVCPH	Carbamidomethyl(C)@15		cleaved H-L@C-term	0.0974894	1848.04	617.021	1847.95	616.989	3	20	8.1.1.5748.4	64.3677	10526.4	9786.73	64.54	1.04	19454.2
2	18.26	18.26	18.21	tr|Q7DMU0	Storage protein OS=Triticum aestivum OX=4565 GN=Gbl1 PE=4 SV=1; Embryo globulin OS=Hordeum vulgare OX=4513 GN=Beg1 PE=2 SV=1	0	93.44	LAVVLEGEGEVQIVCPH	Carbamidomethyl(C)@15		cleaved H-L@C-term	0.0974894	1848.04	617.021	1847.95	616.989	3	22	8.1.1.5749.4	64.4622	10526.4	10109.2	64.54	1.04	20389.5
2	18.26	18.26	18.21	tr|Q7DMU0	Storage protein OS=Triticum aestivum OX=4565 GN=Gbl1 PE=4 SV=1; Embryo globulin OS=Hordeum vulgare OX=4513 GN=Beg1 PE=2 SV=1	0	93.44	LAVVLEGEGEVQIVCPH	Carbamidomethyl(C)@15		cleaved H-L@C-term	0.0974894	1848.04	617.021	1847.95	616.989	3	20	8.1.1.5758.4	65.3139	9466.32	9169.76	65.2	0.95	18828.2
2	18.26	18.26	18.21	tr|Q7DMU0	Storage protein OS=Triticum aestivum OX=4565 GN=Gbl1 PE=4 SV=1; Embryo globulin OS=Hordeum vulgare OX=4513 GN=Beg1 PE=2 SV=1	0	93.44	LAVVLEGEGEVQIVCPH	Carbamidomethyl(C)@15; Carbamidomethyl(H)@17		cleaved H-L@C-term	0.10221	1905.07	636.03	1904.97	635.996	3	20	8.1.1.5773.7	66.7413	1917.9	1645.85	66.8	0.66	8410.88
2	18.26	18.26	18.21	tr|Q7DMU0	Storage protein OS=Triticum aestivum OX=4565 GN=Gbl1 PE=4 SV=1; Embryo globulin OS=Hordeum vulgare OX=4513 GN=Beg1 PE=2 SV=1	0	93.44	LAVVLEGEGEVQIVCPH	Carbamidomethyl(C)@15		cleaved H-L@C-term	0.0963908	1848.04	617.021	1847.95	616.989	3	19	8.1.1.5779.5	67.3001	8205.47	8065.29	67.37	1.23	20920.8
2	18.26	18.26	18.21	tr|Q7DMU0	Storage protein OS=Triticum aestivum OX=4565 GN=Gbl1 PE=4 SV=1; Embryo globulin OS=Hordeum vulgare OX=4513 GN=Beg1 PE=2 SV=1	0	93.44	LAVVLEGEGEVQIVCPH	Carbamidomethyl(C)@15		cleaved H-L@C-term	0.0963908	1848.04	617.021	1847.95	616.989	3	21	8.1.1.5781.5	67.4894	8205.47	8165	67.37	1.23	19129.4
2	18.26	18.26	18.21	tr|Q7DMU0	Storage protein OS=Triticum aestivum OX=4565 GN=Gbl1 PE=4 SV=1; Embryo globulin OS=Hordeum vulgare OX=4513 GN=Beg1 PE=2 SV=1	0	93.44	LAVVLEGEGEVQIVCPH	Carbamidomethyl(C)@15		cleaved H-L@C-term	0.0963908	1848.04	617.021	1847.95	616.989	3	20	8.1.1.5783.6	67.6828	8205.47	7690.11	67.37	1.23	18649.2
2	18.26	18.26	18.21	tr|Q7DMU0	Storage protein OS=Triticum aestivum OX=4565 GN=Gbl1 PE=4 SV=1; Embryo globulin OS=Hordeum vulgare OX=4513 GN=Beg1 PE=2 SV=1	0	93.44	LAVVLEGEGEVQIVCPH	Carbamidomethyl(C)@15		cleaved H-L@C-term	0.0963908	1848.04	617.021	1847.95	616.989	3	20	8.1.1.5788.4	68.1483	8205.47	7321.34	67.37	1.23	17195.9
2	18.26	18.26	18.21	tr|Q7DMU0	Storage protein OS=Triticum aestivum OX=4565 GN=Gbl1 PE=4 SV=1; Embryo globulin OS=Hordeum vulgare OX=4513 GN=Beg1 PE=2 SV=1	0	93.44	LAVVLEGEGEVQIVCPH	Carbamidomethyl(C)@15		cleaved H-L@C-term	0.0998698	1848.05	617.022	1847.95	616.989	3	20	8.1.1.5790.6	68.3458	7927.7	7685.14	68.41	0.47	17317.2
2	18.26	18.26	18.21	tr|Q7DMU0	Storage protein OS=Triticum aestivum OX=4565 GN=Gbl1 PE=4 SV=1; Embryo globulin OS=Hordeum vulgare OX=4513 GN=Beg1 PE=2 SV=1	0	93.44	LAVVLEGEGEVQIVCPH	Carbamidomethyl(C)@15		cleaved H-L@C-term	0.0998698	1848.05	617.022	1847.95	616.989	3	23	8.1.1.5791.6	68.4408	7927.7	7784	68.41	0.47	16861.4
2	18.26	18.26	18.21	tr|Q7DMU0	Storage protein OS=Triticum aestivum OX=4565 GN=Gbl1 PE=4 SV=1; Embryo globulin OS=Hordeum vulgare OX=4513 GN=Beg1 PE=2 SV=1	0	93.44	LAVVLEGEGEVQIVCPH	Carbamidomethyl(C)@15; Carbamidomethyl(H)@17		cleaved H-L@C-term	0.0981814	1905.06	636.029	1904.97	635.996	3	19	8.1.1.5793.8	68.6381	1665.12	1605.16	68.51	1.23	7280.1
2	18.26	18.26	18.21	tr|Q7DMU0	Storage protein OS=Triticum aestivum OX=4565 GN=Gbl1 PE=4 SV=1; Embryo globulin OS=Hordeum vulgare OX=4513 GN=Beg1 PE=2 SV=1	0	93.44	LAVVLEGEGEVQIVCPH	Carbamidomethyl(C)@15; Carbamidomethyl(H)@17		cleaved H-L@C-term	0.10221	1905.07	636.03	1904.97	635.996	3	17	8.1.1.5794.7	68.7287	1681.73	1629.15	68.79	1.04	7723.61
2	18.26	18.26	18.21	tr|Q7DMU0	Storage protein OS=Triticum aestivum OX=4565 GN=Gbl1 PE=4 SV=1; Embryo globulin OS=Hordeum vulgare OX=4513 GN=Beg1 PE=2 SV=1	0	93.44	LAVVLEGEGEVQIVCPH	Carbamidomethyl(C)@15		cleaved H-L@C-term	0.0978556	1848.04	617.022	1847.95	616.989	3	21	8.1.1.5804.6	69.6721	7789.64	6692.57	70.02	1.52	15810.9
2	18.26	18.26	18.21	tr|Q7DMU0	Storage protein OS=Triticum aestivum OX=4565 GN=Gbl1 PE=4 SV=1; Embryo globulin OS=Hordeum vulgare OX=4513 GN=Beg1 PE=2 SV=1	0	93.44	LAVVLEGEGEVQIVCPH	Carbamidomethyl(C)@15		cleaved H-L@C-term	0.0978556	1848.04	617.022	1847.95	616.989	3	21	8.1.1.5805.6	69.7669	7789.64	6843.27	70.02	1.52	15718.9
2	18.26	18.26	18.21	tr|Q7DMU0	Storage protein OS=Triticum aestivum OX=4565 GN=Gbl1 PE=4 SV=1; Embryo globulin OS=Hordeum vulgare OX=4513 GN=Beg1 PE=2 SV=1	0	93.44	LAVVLEGEGEVQIVCPH	Carbamidomethyl(C)@15		cleaved H-L@C-term	0.0978556	1848.04	617.022	1847.95	616.989	3	19	8.1.1.5813.7	70.5293	7789.64	6972.49	70.02	1.52	14579.8
2	18.26	18.26	18.21	tr|Q7DMU0	Storage protein OS=Triticum aestivum OX=4565 GN=Gbl1 PE=4 SV=1; Embryo globulin OS=Hordeum vulgare OX=4513 GN=Beg1 PE=2 SV=1	0	93.44	LAVVLEGEGEVQIVCPH	Carbamidomethyl(C)@15		cleaved H-L@C-term	0.0998698	1848.05	617.022	1847.95	616.989	3	20	8.1.1.5817.9	70.9164	7390.19	7168.19	70.97	1.42	15977.9
2	18.26	18.26	18.21	tr|Q7DMU0	Storage protein OS=Triticum aestivum OX=4565 GN=Gbl1 PE=4 SV=1; Embryo globulin OS=Hordeum vulgare OX=4513 GN=Beg1 PE=2 SV=1	0	93.44	LAVVLEGEGEVQIVCPH	Carbamidomethyl(C)@15		cleaved H-L@C-term	0.0998698	1848.05	617.022	1847.95	616.989	3	20	8.1.1.5818.6	70.9988	7390.19	7046.99	70.97	1.42	15349.6
2	18.26	18.26	18.21	tr|Q7DMU0	Storage protein OS=Triticum aestivum OX=4565 GN=Gbl1 PE=4 SV=1; Embryo globulin OS=Hordeum vulgare OX=4513 GN=Beg1 PE=2 SV=1	0	93.44	LAVVLEGEGEVQIVCPH	Carbamidomethyl(C)@15		cleaved H-L@C-term	0.0974894	1848.04	617.021	1847.95	616.989	3	19	8.1.1.5835.7	72.6154	6659.18	6117.17	72.87	1.14	13834.3
2	18.26	18.26	18.21	tr|Q7DMU0	Storage protein OS=Triticum aestivum OX=4565 GN=Gbl1 PE=4 SV=1; Embryo globulin OS=Hordeum vulgare OX=4513 GN=Beg1 PE=2 SV=1	0	93.44	LAVVLEGEGEVQIVCPH	Carbamidomethyl(C)@15		cleaved H-L@C-term	0.0974894	1848.04	617.021	1847.95	616.989	3	21	8.1.1.5838.8	72.9043	6659.18	6625.97	72.87	1.14	14041.5
2	18.26	18.26	18.21	tr|Q7DMU0	Storage protein OS=Triticum aestivum OX=4565 GN=Gbl1 PE=4 SV=1; Embryo globulin OS=Hordeum vulgare OX=4513 GN=Beg1 PE=2 SV=1	0	93.44	LAVVLEGEGEVQIVCPH	Carbamidomethyl@N-term; Carbamidomethyl(C)@15		cleaved H-L@C-term	0.108252	1905.07	636.032	1904.97	635.996	3	17	8.1.1.5842.8	73.2839	43.167	43.167			6286.44
2	18.26	18.26	18.21	tr|Q7DMU0	Storage protein OS=Triticum aestivum OX=4565 GN=Gbl1 PE=4 SV=1; Embryo globulin OS=Hordeum vulgare OX=4513 GN=Beg1 PE=2 SV=1	0	93.44	LAVVLEGEGEVQIVCPH	Carbamidomethyl(C)@15; Carbamidomethyl(H)@17		cleaved H-L@C-term	0.103125	1905.07	636.03	1904.97	635.996	3	17	8.1.1.5882.8	77.0768	1284	1034.03	76.76	0.95	5202.28
2	18.26	18.26	18.21	tr|Q7DMU0	Storage protein OS=Triticum aestivum OX=4565 GN=Gbl1 PE=4 SV=1; Embryo globulin OS=Hordeum vulgare OX=4513 GN=Beg1 PE=2 SV=1	0	93.44	LAVVLEGEGEVQIVCPH	Carbamidomethyl(C)@15		cleaved H-L@C-term	0.101518	1848.05	617.023	1847.95	616.989	3	19	8.1.1.5905.8	79.2592	4943.05	3956.65	78.27	1.33	9567.42
2	18.26	18.26	18.21	tr|Q7DMU0	Storage protein OS=Triticum aestivum OX=4565 GN=Gbl1 PE=4 SV=1; Embryo globulin OS=Hordeum vulgare OX=4513 GN=Beg1 PE=2 SV=1	0	88.27	LAVVLEGEGEVQIVCPH	Carbamidomethyl(C)@15		cleaved H-L@C-term	-0.00836044	1847.94	924.976	1847.95	924.98	2	15	5.1.1.6794.21	89.7	953	623.22	88.94	1.71	3674.24
2	18.26	18.26	18.21	tr|Q7DMU0	Storage protein OS=Triticum aestivum OX=4565 GN=Gbl1 PE=4 SV=1; Embryo globulin OS=Hordeum vulgare OX=4513 GN=Beg1 PE=2 SV=1	0	88.27	LAVVLEGEGEVQIVCPH	Carbamidomethyl(C)@15		cleaved H-L@C-term	-0.0101913	1847.93	924.975	1847.95	924.98	2	16	5.1.1.6802.21	90.457	727.56	658.37	90.64	1.7	3918.5
2	18.26	18.26	18.21	tr|Q7DMU0	Storage protein OS=Triticum aestivum OX=4565 GN=Gbl1 PE=4 SV=1; Embryo globulin OS=Hordeum vulgare OX=4513 GN=Beg1 PE=2 SV=1	0	88.27	LAVVLEGEGEVQIVCPH	Carbamidomethyl(C)@15		cleaved H-L@C-term	-0.0101913	1847.93	924.975	1847.95	924.98	2	15	5.1.1.6806.21	90.8342	727.56	623.39	90.64	1.7	3136.22
2	18.26	18.26	18.21	tr|Q7DMU0	Storage protein OS=Triticum aestivum OX=4565 GN=Gbl1 PE=4 SV=1; Embryo globulin OS=Hordeum vulgare OX=4513 GN=Beg1 PE=2 SV=1	0	88.27	LAVVLEGEGEVQIVCPH	Carbamidomethyl(C)@15		cleaved H-L@C-term	0.0126922	1847.96	616.993	1847.95	616.989	3	15	5.1.1.6810.3	91.136	1316.39	629.04	89.79	2.84	3497.23
2	18.26	18.26	18.21	tr|Q7DMU0	Storage protein OS=Triticum aestivum OX=4565 GN=Gbl1 PE=4 SV=1; Embryo globulin OS=Hordeum vulgare OX=4513 GN=Beg1 PE=2 SV=1	0	88.27	LAVVLEGEGEVQIVCPH	Carbamidomethyl(C)@15		cleaved H-L@C-term	0.0126922	1847.96	616.993	1847.95	616.989	3	15	5.1.1.6815.4	91.6112	1316.39	480.83	89.79	2.84	2634.21
2	18.26	18.26	18.21	tr|Q7DMU0	Storage protein OS=Triticum aestivum OX=4565 GN=Gbl1 PE=4 SV=1; Embryo globulin OS=Hordeum vulgare OX=4513 GN=Beg1 PE=2 SV=1	0	88.27	LAVVLEGEGEVQIVCPH	Carbamidomethyl(C)@15		cleaved H-L@C-term	-0.0101913	1847.93	924.975	1847.95	924.98	2	17	5.1.1.6818.16	91.9565	727.56	328.76	90.64	1.7	2591.14
2	18.26	18.26	18.21	tr|Q7DMU0	Storage protein OS=Triticum aestivum OX=4565 GN=Gbl1 PE=4 SV=1; Embryo globulin OS=Hordeum vulgare OX=4513 GN=Beg1 PE=2 SV=1	0	84.69	LAVVLEGEGEVQIVCPH	Carbamidomethyl(C)@15		cleaved H-L@C-term	0.0974894	1848.04	617.021	1847.95	616.989	3	20	8.1.1.5750.4	64.5567	10526.4	10379.5	64.54	1.04	20905.5
2	18.26	18.26	18.21	tr|Q7DMU0	Storage protein OS=Triticum aestivum OX=4565 GN=Gbl1 PE=4 SV=1; Embryo globulin OS=Hordeum vulgare OX=4513 GN=Beg1 PE=2 SV=1	0	84.69	LAVVLEGEGEVQIVCPH	Carbamidomethyl(C)@15		cleaved H-L@C-term	0.119536	1848.06	925.04	1847.95	924.98	2	19	8.1.1.5755.20	65.0965	7078.49	6384.9	64.54	1.42	17293.7
2	18.26	18.26	18.21	tr|Q7DMU0	Storage protein OS=Triticum aestivum OX=4565 GN=Gbl1 PE=4 SV=1; Embryo globulin OS=Hordeum vulgare OX=4513 GN=Beg1 PE=2 SV=1	0	84.69	LAVVLEGEGEVQIVCPH	Carbamidomethyl(C)@15		cleaved H-L@C-term	0.0974894	1848.04	617.021	1847.95	616.989	3	19	8.1.1.5759.2	65.4002	9466.32	9049.3	65.2	0.95	17957.9
2	18.26	18.26	18.21	tr|Q7DMU0	Storage protein OS=Triticum aestivum OX=4565 GN=Gbl1 PE=4 SV=1; Embryo globulin OS=Hordeum vulgare OX=4513 GN=Beg1 PE=2 SV=1	0	84.69	LAVVLEGEGEVQIVCPH	Carbamidomethyl(C)@15; Carbamidomethyl(H)@17		cleaved H-L@C-term	0.0989139	1905.07	636.029	1904.97	635.996	3	19	8.1.1.5765.6	65.9851	2392.65	2375.58	66.05	1.04	8053.11
2	18.26	18.26	18.21	tr|Q7DMU0	Storage protein OS=Triticum aestivum OX=4565 GN=Gbl1 PE=4 SV=1; Embryo globulin OS=Hordeum vulgare OX=4513 GN=Beg1 PE=2 SV=1	0	84.69	LAVVLEGEGEVQIVCPH	Carbamidomethyl(C)@15		cleaved H-L@C-term	0.0974894	1848.04	617.021	1847.95	616.989	3	19	8.1.1.5839.7	72.9949	6659.18	6535.71	72.87	1.14	13366
2	18.26	18.26	18.21	tr|Q7DMU0	Storage protein OS=Triticum aestivum OX=4565 GN=Gbl1 PE=4 SV=1; Embryo globulin OS=Hordeum vulgare OX=4513 GN=Beg1 PE=2 SV=1	0	84.69	LAVVLEGEGEVQIVCPH	Carbamidomethyl@N-term; Carbamidomethyl(C)@15		cleaved H-L@C-term	0.0976321	1905.06	636.029	1904.97	635.996	3	16	8.1.1.5849.8	73.9479	39.528	39.528			6088.31
2	18.26	18.26	18.21	tr|Q7DMU0	Storage protein OS=Triticum aestivum OX=4565 GN=Gbl1 PE=4 SV=1; Embryo globulin OS=Hordeum vulgare OX=4513 GN=Beg1 PE=2 SV=1	0	84.69	LAVVLEGEGEVQIVCPH	Carbamidomethyl(C)@15; Carbamidomethyl(H)@17		cleaved H-L@C-term	0.100745	1905.07	636.03	1904.97	635.996	3	16	8.1.1.5851.9	74.1419	1404.62	1270.57	74.48	1.14	5996.31
2	18.26	18.26	18.21	tr|Q7DMU0	Storage protein OS=Triticum aestivum OX=4565 GN=Gbl1 PE=4 SV=1; Embryo globulin OS=Hordeum vulgare OX=4513 GN=Beg1 PE=2 SV=1	0	84.69	LAVVLEGEGEVQIVCPH	Carbamidomethyl@N-term; Carbamidomethyl(C)@15		cleaved H-L@C-term	0.103125	1905.07	636.03	1904.97	635.996	3	17	8.1.1.5880.10	76.8956	1284	1087.18	76.76	0.95	5112.28
2	18.26	18.26	18.21	tr|Q7DMU0	Storage protein OS=Triticum aestivum OX=4565 GN=Gbl1 PE=4 SV=1; Embryo globulin OS=Hordeum vulgare OX=4513 GN=Beg1 PE=2 SV=1	0	84.69	LAVVLEGEGEVQIVCPH	Carbamidomethyl(C)@15		cleaved H-L@C-term	0.0987711	1848.04	617.022	1847.95	616.989	3	18	8.1.1.5885.7	77.3572	4998.72	4830.03	77.23	1.04	11411.7
2	18.26	18.26	18.21	tr|Q7DMU0	Storage protein OS=Triticum aestivum OX=4565 GN=Gbl1 PE=4 SV=1; Embryo globulin OS=Hordeum vulgare OX=4513 GN=Beg1 PE=2 SV=1	0	84.69	LAVVLEGEGEVQIVCPH	Carbamidomethyl(C)@15; Carbamidomethyl(H)@17		cleaved H-L@C-term	0.103125	1905.07	636.03	1904.97	635.996	3	16	8.1.1.5885.8	77.3614	1284	927.75	76.76	0.95	5995.56
2	18.26	18.26	18.21	tr|Q7DMU0	Storage protein OS=Triticum aestivum OX=4565 GN=Gbl1 PE=4 SV=1; Embryo globulin OS=Hordeum vulgare OX=4513 GN=Beg1 PE=2 SV=1	0	84.69	LAVVLEGEGEVQIVCPH	Carbamidomethyl(C)@15		cleaved H-L@C-term	0.101518	1848.05	617.023	1847.95	616.989	3	19	8.1.1.5898.9	78.5995	4943.05	4574.88	78.27	1.33	9940.18
2	18.26	18.26	18.21	tr|Q7DMU0	Storage protein OS=Triticum aestivum OX=4565 GN=Gbl1 PE=4 SV=1; Embryo globulin OS=Hordeum vulgare OX=4513 GN=Beg1 PE=2 SV=1	0	77.95	LAVVLEGEGEVQIVCPH	Carbamidomethyl(C)@15		cleaved H-L@C-term	-0.0101913	1847.93	924.975	1847.95	924.98	2	15	5.1.1.6800.21	90.2679	727.56	622.57	90.64	1.7	4269.01
2	18.26	18.26	18.21	tr|Q7DMU0	Storage protein OS=Triticum aestivum OX=4565 GN=Gbl1 PE=4 SV=1; Embryo globulin OS=Hordeum vulgare OX=4513 GN=Beg1 PE=2 SV=1	0	77.95	LAVVLEGEGEVQIVCPH	Carbamidomethyl(C)@15		cleaved H-L@C-term	-0.0101913	1847.93	924.975	1847.95	924.98	2	13	5.1.1.6803.21	90.5515	727.56	692.09	90.64	1.7	3446.73
2	18.26	18.26	18.21	tr|Q7DMU0	Storage protein OS=Triticum aestivum OX=4565 GN=Gbl1 PE=4 SV=1; Embryo globulin OS=Hordeum vulgare OX=4513 GN=Beg1 PE=2 SV=1	0	77.95	LAVVLEGEGEVQIVCPH	Carbamidomethyl(C)@15		cleaved H-L@C-term	-0.0101913	1847.93	924.975	1847.95	924.98	2	13	5.1.1.6807.21	90.9284	727.56	569.86	90.64	1.7	2876.21
2	18.26	18.26	18.21	tr|Q7DMU0	Storage protein OS=Triticum aestivum OX=4565 GN=Gbl1 PE=4 SV=1; Embryo globulin OS=Hordeum vulgare OX=4513 GN=Beg1 PE=2 SV=1	0	77.95	LAVVLEGEGEVQIVCPH	Carbamidomethyl(C)@15		cleaved H-L@C-term	-0.0101913	1847.93	924.975	1847.95	924.98	2	14	5.1.1.6808.21	91.0226	727.56	548.13	90.64	1.7	2861.21
2	18.26	18.26	18.21	tr|Q7DMU0	Storage protein OS=Triticum aestivum OX=4565 GN=Gbl1 PE=4 SV=1; Embryo globulin OS=Hordeum vulgare OX=4513 GN=Beg1 PE=2 SV=1	0	77.95	LAVVLEGEGEVQIVCPH	Carbamidomethyl(C)@15		cleaved H-L@C-term	-0.0101913	1847.93	924.975	1847.95	924.98	2	15	5.1.1.6809.18	91.1084	727.56	529.97	90.64	1.7	2910.65
2	18.26	18.26	18.21	tr|Q7DMU0	Storage protein OS=Triticum aestivum OX=4565 GN=Gbl1 PE=4 SV=1; Embryo globulin OS=Hordeum vulgare OX=4513 GN=Beg1 PE=2 SV=1	0	77.95	LAVVLEGEGEVQIVCPH	Carbamidomethyl(C)@15		cleaved H-L@C-term	-0.0101913	1847.93	924.975	1847.95	924.98	2	14	5.1.1.6811.21	91.3052	727.56	486.46	90.64	1.7	2710.21
2	18.26	18.26	18.21	tr|Q7DMU0	Storage protein OS=Triticum aestivum OX=4565 GN=Gbl1 PE=4 SV=1; Embryo globulin OS=Hordeum vulgare OX=4513 GN=Beg1 PE=2 SV=1	0	77.95	LAVVLEGEGEVQIVCPH	Carbamidomethyl(C)@15		cleaved H-L@C-term	-0.0101913	1847.93	924.975	1847.95	924.98	2	13	5.1.1.6812.15	91.3994	727.56	464.54	90.64	1.7	2658.61
2	18.26	18.26	18.21	tr|Q7DMU0	Storage protein OS=Triticum aestivum OX=4565 GN=Gbl1 PE=4 SV=1; Embryo globulin OS=Hordeum vulgare OX=4513 GN=Beg1 PE=2 SV=1	0	77.95	LAVVLEGEGEVQIVCPH	Carbamidomethyl(C)@15		cleaved H-L@C-term	-0.0101913	1847.93	924.975	1847.95	924.98	2	15	5.1.1.6813.16	91.4852	727.56	444.59	90.64	1.7	2682.17
2	18.26	18.26	18.21	tr|Q7DMU0	Storage protein OS=Triticum aestivum OX=4565 GN=Gbl1 PE=4 SV=1; Embryo globulin OS=Hordeum vulgare OX=4513 GN=Beg1 PE=2 SV=1	0	77.95	LAVVLEGEGEVQIVCPH	Carbamidomethyl(C)@15		cleaved H-L@C-term	-0.0101913	1847.93	924.975	1847.95	924.98	2	13	5.1.1.6814.21	91.5877	727.56	426.57	90.64	1.7	2889.47
2	18.26	18.26	18.21	tr|Q7DMU0	Storage protein OS=Triticum aestivum OX=4565 GN=Gbl1 PE=4 SV=1; Embryo globulin OS=Hordeum vulgare OX=4513 GN=Beg1 PE=2 SV=1	0	77.95	LAVVLEGEGEVQIVCPH	Carbamidomethyl(C)@15		cleaved H-L@C-term	0.0126922	1847.96	616.993	1847.95	616.989	3	13	5.1.1.6816.5	91.7096	1316.39	471.17	89.79	2.84	2524.2
2	18.26	18.26	18.21	tr|Q7DMU0	Storage protein OS=Triticum aestivum OX=4565 GN=Gbl1 PE=4 SV=1; Embryo globulin OS=Hordeum vulgare OX=4513 GN=Beg1 PE=2 SV=1	0	77.95	LAVVLEGEGEVQIVCPH	Carbamidomethyl(C)@15		cleaved H-L@C-term	-0.0101913	1847.93	924.975	1847.95	924.98	2	14	5.1.1.6817.19	91.8622	727.56	363.99	90.64	1.7	2683.71
2	18.26	18.26	18.21	tr|Q7DMU0	Storage protein OS=Triticum aestivum OX=4565 GN=Gbl1 PE=4 SV=1; Embryo globulin OS=Hordeum vulgare OX=4513 GN=Beg1 PE=2 SV=1	0	77.95	LAVVLEGEGEVQIVCPH	Carbamidomethyl(C)@15		cleaved H-L@C-term	-0.0101913	1847.93	924.975	1847.95	924.98	2	16	5.1.1.6819.17	92.0591	727.56	290.41	90.64	1.7	2685.64
2	18.26	18.26	18.21	tr|Q7DMU0	Storage protein OS=Triticum aestivum OX=4565 GN=Gbl1 PE=4 SV=1; Embryo globulin OS=Hordeum vulgare OX=4513 GN=Beg1 PE=2 SV=1	0	77.95	LAVVLEGEGEVQIVCPH	Carbamidomethyl(C)@15		cleaved H-L@C-term	-0.0120221	1847.93	924.974	1847.95	924.98	2	16	5.1.1.7936.19	108.982	1654.73	1443.66	109.2	0.85	6591.33
2	18.26	18.26	18.21	tr|Q7DMU0	Storage protein OS=Triticum aestivum OX=4565 GN=Gbl1 PE=4 SV=1; Embryo globulin OS=Hordeum vulgare OX=4513 GN=Beg1 PE=2 SV=1	0	68.01	LAVVLEGEGEVQIVCPH	Carbamidomethyl(C)@15		cleaved H-L@C-term	-0.0101913	1847.93	924.975	1847.95	924.98	2	13	5.1.1.6816.19	91.768	727.56	396.45	90.64	1.7	2730.97
2	18.26	18.26	18.21	tr|Q7DMU0	Storage protein OS=Triticum aestivum OX=4565 GN=Gbl1 PE=4 SV=1; Embryo globulin OS=Hordeum vulgare OX=4513 GN=Beg1 PE=2 SV=1	0	66.08	LAVVLEGEGEVQIVCPH	Carbamidomethyl(C)@15		cleaved H-L@C-term	0.153886	1848.1	617.04	1847.95	616.989	3	10	4.1.1.2785.8	72.9913	895.68	737.14	72.69	1.43	4271.26
2	18.26	18.26	18.21	tr|Q7DMU0	Storage protein OS=Triticum aestivum OX=4565 GN=Gbl1 PE=4 SV=1; Embryo globulin OS=Hordeum vulgare OX=4513 GN=Beg1 PE=2 SV=1	0	66.08	LAVVLEGEGEVQIVCPH	Carbamidomethyl(C)@15		cleaved H-L@C-term	0.157914	1848.1	617.042	1847.95	616.989	3	10	4.1.1.2866.9	80.6956	619.43	393.8	79.5	2	2948.22
[truncated: 13,260 more rows]

## Sheet: Chymotrypsin
Supplementary File 1B. Peptides identified in developing endosperm of barley cv Sloop after chymotrypsin digestion.
[truncated: 20,567 more rows]
